# Supplementary material for: Potential bioavailability of pyrogenic organic matter resembles natural dissolved organic matter pools
Source: Copernicus journal article supplement (doi:10.5194/egusphere-2022-194), 2022-05-19
Supplement: Supplementary file 1 [file egusphere-2022-194-supplement-version2.zip]

Archive with 2 entries (2 files):
- Graham et al Table S1-S4_revised.xlsx
- SI.pdf
