# Supplementary material for: Potential bioavailability of pyrogenic organic matter resembles natural dissolved organic matter pools
Source: Copernicus journal article supplement (doi:10.5194/egusphere-2022-194), 2022-05-19
Supplement: Supplementary file 1 [file Graham et al Table S1-S4_revised.xlsx]

## Sheet: SI Table Key
Location	Heading	Unit	Description
S1	Molecular Formula	NA	Molecular Formula from the primary literature
S1	Literature Compound Name	NA	Name of the compound assigned in the primary literature. Only molecular formulae are known for compound names marked as "Unknown", which were theoretical compounds determined via FTICRMS formula assignment of charcoal leachates in the literature.
S1	Assigned IUPAC Name	NA	IUPAC name of the primary literature assigned name. Compounds with "None Designated" were interpreted or interpolated via mass spectrum or homologous series fragementation patterns, and therefore we did not assign an IUPAC name. * - indicates IUPAC name is just an example compound; the common name from the literature represents a group of compounds rather than one single compound.
S1	Literature Assigned Compound Class	NA	Compound class assigned by the primary literature source
S1	References	NA	Primary literature sources
S1	Literature Method	NA	Major chemical compound characterization method used in primary literature
S1	Literature Material Analyzed	NA	Description of pyrogenic source material compounds were derived from in the literature
S2 S3 S4	Molecular Formula	NA	Molecular Formula assigned by primary literature for table S1, S2 and Identified by an algorithm in Kujawinski and Behn 2006 and modified as described in Tfaily et al., 2017 for S3, S4
S2 S3 S4	Group	NA	Known (PyOM) or Inferred compound chemical class (NOM) as per Kim et al., 2003
S2 S3 S4	𝚫GCox	kJ/ mol-C	Gibbs free energy of the carbon oxidation half reaction at pH. Calculated as per Song et al., 2020
S2 S3 S4	𝚫Gd	kJ/compound mol	Gibbs free energy of the carbon oxidation half reaction per compound mol at pH. Calculated as per Song et al., 2020
S2 S3 S4	𝚫GCat	kJ/ mol-C	Gibbs energies of catabolic reactions. Calculated as per Song et al., 2020
S2 S3 S4	𝚫Gan	kJ/ mol-C	Gibbs energies of catabolic and anabolic reactions. Calculated as per Song et al., 2020
S2 S3 S4	𝚫Gdis	kJ/ mol-C	Dissipation energy. Calculated as per Song et al., 2020
S2 S3 S4	λ	unitless	The parameter lambda as calculated as per Song et al., 2020
S2 S3 S4	CUE	unitless	Carbon Use Efficiency
S2 S3 S4	Aerobic Respiration	mol-O2/C-mol-biomass/h	Rate of aerobic respiration
S2 S3 S4	Aerobic Respiration, C limited	mol-O2/C-mol-biomass/h	Rate of aerobic respiration under carbon limitation
S2 S3 S4	Aerobic Respiration, O limited	mol-O2/C-mol-biomass/h	Rate of aerobic respiration under oxygen limitation

## Sheet: Table S1 PyOM Literature In
	Table S1. Table of all selected primary literature PyOM molecules and associated chemical properties. Only molecular formulae are known for compound names marked as "Unknown", which were theoretical compounds determined via FT-ICR-MS formula assignment of charcoal leachates in the literature. Compounds with "None Designated" were interpreted or interpolated via mass spectrum or homologous series …
Unique ID	Molecular Formula	Literature Compound Name	Assigned IUPAC Name	Literature Material Analyzed	Literature Method	Literature Assigned Compound Class	Compound Group Assigned as in Kim et al 2003	Compound Group Assigned as in Bailey et al 2017	Compound Group Assigned as in Rivas-Ubach et al 2018	References
1	C8H10NO5	Unknown	Unknown	plant biochar leachate	solid phase extraction, FT-ICR-MS	solid phase extraction, FT-ICR-MS	Lignin	Lignin	Other	Chen et al., 2022; Yan et al., 2022
2	C12H10NO2	Unknown	Unknown	plant biochar leachate	solid phase extraction, FT-ICR-MS	solid phase extraction, FT-ICR-MS	Other	Lignin	Other	Chen et al., 2022; Yan et al., 2022
3	C8H14N3OS	Unknown	Unknown	plant biochar leachate	solid phase extraction, FT-ICR-MS	solid phase extraction, FT-ICR-MS	Lipid	Lipid;Unsat Hydrocarbon	Protein	Chen et al., 2022
4	C9H14NO4	Unknown	Unknown	plant biochar leachate	solid phase extraction, FT-ICR-MS	solid phase extraction, FT-ICR-MS	Protein	Protein	Other	Chen et al., 2022
5	C10H18NO3	Unknown	Unknown	plant biochar leachate	solid phase extraction, FT-ICR-MS	solid phase extraction, FT-ICR-MS	Lipid;Protein	Lipid	Other	Chen et al., 2022
6	C7H5O5S	Unknown	Unknown	plant biochar leachate	solid phase extraction, FT-ICR-MS	solid phase extraction, FT-ICR-MS	Tannin	Cond Hydrocarbon	Other	Chen et al., 2022
7	C11H5O2S	Unknown	Unknown	plant biochar leachate	solid phase extraction, FT-ICR-MS	solid phase extraction, FT-ICR-MS	Cond Hydrocarbon	Cond Hydrocarbon	Other	Chen et al., 2022
8	C7H5O7	Unknown	Unknown	plant biochar leachate	solid phase extraction, FT-ICR-MS	solid phase extraction, FT-ICR-MS	Tannin	Other	Other	Chen et al., 2022; Yan et al., 2022
9	C11H5O4	Unknown	Unknown	plant biochar leachate	solid phase extraction, FT-ICR-MS	solid phase extraction, FT-ICR-MS	Cond Hydrocarbon	Cond Hydrocarbon	Other	Chen et al., 2022; Yan et al., 2022
10	C8H9O4S	Unknown	Unknown	plant biochar leachate	solid phase extraction, FT-ICR-MS	solid phase extraction, FT-ICR-MS	Lignin	Lignin	Other	Chen et al., 2022
11	C8H9O6	Unknown	Unknown	plant biochar leachate	solid phase extraction, FT-ICR-MS	solid phase extraction, FT-ICR-MS	Tannin	Tannin	Other	Chen et al., 2022; Yan et al., 2022
12	C12H9O3	Unknown	Unknown	plant biochar leachate	solid phase extraction, FT-ICR-MS	solid phase extraction, FT-ICR-MS	Cond Hydrocarbon	Cond Hydrocarbon	Other	Chen et al., 2022; Yan et al., 2022
13	C9H13O5	Unknown	Unknown	plant biochar leachate	solid phase extraction, FT-ICR-MS	solid phase extraction, FT-ICR-MS	Lignin;Amino Sugar	Lignin	Other	Chen et al., 2022; Yan et al., 2022
14	C8H13N2O4	Unknown	Unknown	plant biochar leachate	solid phase extraction, FT-ICR-MS	solid phase extraction, FT-ICR-MS	Protein	Protein	Protein	Chen et al., 2022
15	C13H13O2	Unknown	Unknown	plant biochar leachate	solid phase extraction, FT-ICR-MS	solid phase extraction, FT-ICR-MS	Other	Lignin	Other	Chen et al., 2022
16	C10H17O4	Unknown	Unknown	plant biochar leachate	solid phase extraction, FT-ICR-MS	solid phase extraction, FT-ICR-MS	Protein	Protein	Other	Chen et al., 2022; Yan et al., 2022
17	C11H8NO3	Unknown	Unknown	plant biochar leachate	solid phase extraction, FT-ICR-MS	solid phase extraction, FT-ICR-MS	Cond Hydrocarbon	Cond Hydrocarbon	Other	Chen et al., 2022; Yan et al., 2022
18	C8H12NO5	Unknown	Unknown	plant biochar leachate	solid phase extraction, FT-ICR-MS	solid phase extraction, FT-ICR-MS	Amino Sugar	Amino Sugar	Other	Chen et al., 2022
19	C9H16NO4	Unknown	Unknown	plant biochar leachate	solid phase extraction, FT-ICR-MS	solid phase extraction, FT-ICR-MS	Protein	Protein	Other	Chen et al., 2022
20	C10H3O5	Unknown	Unknown	plant biochar leachate	solid phase extraction, FT-ICR-MS	solid phase extraction, FT-ICR-MS	Cond Hydrocarbon	Cond Hydrocarbon	Other	Chen et al., 2022
21	C11H7O2S	Unknown	Unknown	plant biochar leachate	solid phase extraction, FT-ICR-MS	solid phase extraction, FT-ICR-MS	Cond Hydrocarbon	Cond Hydrocarbon	Other	Chen et al., 2022
22	C7H7O7	Unknown	Unknown	plant biochar leachate	solid phase extraction, FT-ICR-MS	solid phase extraction, FT-ICR-MS	Tannin	Tannin	Other	Chen et al., 2022
23	C11H7O4	Unknown	Unknown	plant biochar leachate	solid phase extraction, FT-ICR-MS	solid phase extraction, FT-ICR-MS	Cond Hydrocarbon	Cond Hydrocarbon	Other	Chen et al., 2022; Yan et al., 2022
24	C10H7N2O3	Unknown	Unknown	plant biochar leachate	solid phase extraction, FT-ICR-MS	solid phase extraction, FT-ICR-MS	Cond Hydrocarbon	Cond Hydrocarbon	Other	Chen et al., 2022; Yan et al., 2022
25	C8H11O6	Unknown	Unknown	plant biochar leachate	solid phase extraction, FT-ICR-MS	solid phase extraction, FT-ICR-MS	Other	Tannin	Other	Chen et al., 2022; Yan et al., 2022
26	C12H11O3	Unknown	Unknown	plant biochar leachate	solid phase extraction, FT-ICR-MS	solid phase extraction, FT-ICR-MS	Other	Lignin	Other	Chen et al., 2022; Yan et al., 2022
27	C9H15O5	Unknown	Unknown	plant biochar leachate	solid phase extraction, FT-ICR-MS	solid phase extraction, FT-ICR-MS	Amino Sugar	Amino Sugar	Other	Chen et al., 2022
28	C13H15O2	Unknown	Unknown	plant biochar leachate	solid phase extraction, FT-ICR-MS	solid phase extraction, FT-ICR-MS	Other	Lignin	Other	Chen et al., 2022
29	C11H23OS	Unknown	Unknown	plant biochar leachate	solid phase extraction, FT-ICR-MS	solid phase extraction, FT-ICR-MS	Lipid	Lipid;Unsat Hydrocarbon	Other	Chen et al., 2022
30	C10H6NO4	Unknown	Unknown	plant biochar leachate	solid phase extraction, FT-ICR-MS	solid phase extraction, FT-ICR-MS	Cond Hydrocarbon	Cond Hydrocarbon	Other	Chen et al., 2022; Yan et al., 2022
31	C11H10NO3	Unknown	Unknown	plant biochar leachate	solid phase extraction, FT-ICR-MS	solid phase extraction, FT-ICR-MS	Other	Lignin	Other	Chen et al., 2022; Yan et al., 2022
32	C10H5O5	Unknown	Unknown	plant biochar leachate	solid phase extraction, FT-ICR-MS	solid phase extraction, FT-ICR-MS	Cond Hydrocarbon	Cond Hydrocarbon	Other	Chen et al., 2022; Yan et al., 2022
33	C7H9O5S	Unknown	Unknown	plant biochar leachate	solid phase extraction, FT-ICR-MS	solid phase extraction, FT-ICR-MS	Tannin	Tannin	Other	Chen et al., 2022
34	C9H5N2O4	Unknown	Unknown	plant biochar leachate	solid phase extraction, FT-ICR-MS	solid phase extraction, FT-ICR-MS	Cond Hydrocarbon	Cond Hydrocarbon	Other	Chen et al., 2022; Yan et al., 2022
35	C7H9O7	Unknown	Unknown	plant biochar leachate	solid phase extraction, FT-ICR-MS	solid phase extraction, FT-ICR-MS	Tannin	Tannin	Other	Chen et al., 2022
36	C13H5N2O	Unknown	Unknown	plant biochar leachate	solid phase extraction, FT-ICR-MS	solid phase extraction, FT-ICR-MS	Other	Cond Hydrocarbon	Other	Chen et al., 2022
37	C11H9O4	Unknown	Unknown	plant biochar leachate	solid phase extraction, FT-ICR-MS	solid phase extraction, FT-ICR-MS	Lignin	Lignin	Other	Chen et al., 2022; Yan et al., 2022
38	C10H9N2O3	Unknown	Unknown	plant biochar leachate	solid phase extraction, FT-ICR-MS	solid phase extraction, FT-ICR-MS	Lignin	Lignin	Other	Chen et al., 2022; Yan et al., 2022
39	C8H13O6	Unknown	Unknown	plant biochar leachate	solid phase extraction, FT-ICR-MS	solid phase extraction, FT-ICR-MS	Carbohydrate	Carbohydrate	Other	Chen et al., 2022
40	C12H13O3	Unknown	Unknown	plant biochar leachate	solid phase extraction, FT-ICR-MS	solid phase extraction, FT-ICR-MS	Other	Lignin	Other	Chen et al., 2022; Yan et al., 2022
41	C13H17O2	Unknown	Unknown	plant biochar leachate	solid phase extraction, FT-ICR-MS	solid phase extraction, FT-ICR-MS	Other	Lignin	Other	Chen et al., 2022
42	C10H21O2S	Unknown	Unknown	plant biochar leachate	solid phase extraction, FT-ICR-MS	solid phase extraction, FT-ICR-MS	Lipid	Lipid	Other	Chen et al., 2022
43	C14H21O	Unknown	Unknown	plant biochar leachate	solid phase extraction, FT-ICR-MS	solid phase extraction, FT-ICR-MS	Unsat Hydrocarbon	Lipid;Unsat Hydrocarbon	Other	Chen et al., 2022
44	C9H4NO5	Unknown	Unknown	plant biochar leachate	solid phase extraction, FT-ICR-MS	solid phase extraction, FT-ICR-MS	Cond Hydrocarbon	Cond Hydrocarbon	Other	Chen et al., 2022; Yan et al., 2022
45	C10H8NO2S	Unknown	Unknown	plant biochar leachate	solid phase extraction, FT-ICR-MS	solid phase extraction, FT-ICR-MS	Cond Hydrocarbon	Lignin	Other	Chen et al., 2022
46	C10H8NO4	Unknown	Unknown	plant biochar leachate	solid phase extraction, FT-ICR-MS	solid phase extraction, FT-ICR-MS	Cond Hydrocarbon	Lignin	Other	Chen et al., 2022; Yan et al., 2022
47	C11H12NO3	Unknown	Unknown	plant biochar leachate	solid phase extraction, FT-ICR-MS	solid phase extraction, FT-ICR-MS	Other	Lignin	Other	Chen et al., 2022; Yan et al., 2022
48	C8H16NO3S	Unknown	Unknown	plant biochar leachate	solid phase extraction, FT-ICR-MS	solid phase extraction, FT-ICR-MS	Protein	Protein	Other	Chen et al., 2022
49	C9H3O4S	Unknown	Unknown	plant biochar leachate	solid phase extraction, FT-ICR-MS	solid phase extraction, FT-ICR-MS	Cond Hydrocarbon	Cond Hydrocarbon	Other	Chen et al., 2022
50	C9H3O6	Unknown	Unknown	plant biochar leachate	solid phase extraction, FT-ICR-MS	solid phase extraction, FT-ICR-MS	Cond Hydrocarbon	Cond Hydrocarbon	Other	Chen et al., 2022; Yan et al., 2022
51	C8H3N2O5	Unknown	Unknown	plant biochar leachate	solid phase extraction, FT-ICR-MS	solid phase extraction, FT-ICR-MS	Cond Hydrocarbon	Cond Hydrocarbon	Other	Chen et al., 2022
52	C10H7O5	Unknown	Unknown	plant biochar leachate	solid phase extraction, FT-ICR-MS	solid phase extraction, FT-ICR-MS	Cond Hydrocarbon	Cond Hydrocarbon	Other	Chen et al., 2022; Yan et al., 2022
53	C7H11O7	Unknown	Unknown	plant biochar leachate	solid phase extraction, FT-ICR-MS	solid phase extraction, FT-ICR-MS	Carbohydrate	Carbohydrate	Other	Chen et al., 2022
54	C11H11O4	Unknown	Unknown	plant biochar leachate	solid phase extraction, FT-ICR-MS	solid phase extraction, FT-ICR-MS	Lignin	Lignin	Other	Chen et al., 2022; Yan et al., 2022
55	C10H11N2O3	Unknown	Unknown	plant biochar leachate	solid phase extraction, FT-ICR-MS	solid phase extraction, FT-ICR-MS	Lignin	Lignin	Protein	Chen et al., 2022
56	C12H15O3	Unknown	Unknown	plant biochar leachate	solid phase extraction, FT-ICR-MS	solid phase extraction, FT-ICR-MS	Other	Lignin	Other	Chen et al., 2022
57	C11H15N2O2	Unknown	Unknown	plant biochar leachate	solid phase extraction, FT-ICR-MS	solid phase extraction, FT-ICR-MS	Other	Lignin	Protein	Chen et al., 2022
58	C14H23O	Unknown	Unknown	plant biochar leachate	solid phase extraction, FT-ICR-MS	solid phase extraction, FT-ICR-MS	Lipid	Lipid;Unsat Hydrocarbon	Other	Chen et al., 2022
59	C9H6NO5	Unknown	Unknown	plant biochar leachate	solid phase extraction, FT-ICR-MS	solid phase extraction, FT-ICR-MS	Cond Hydrocarbon	Cond Hydrocarbon	Other	Chen et al., 2022; Yan et al., 2022
60	C10H10NO4	Unknown	Unknown	plant biochar leachate	solid phase extraction, FT-ICR-MS	solid phase extraction, FT-ICR-MS	Lignin	Lignin	Other	Chen et al., 2022; Yan et al., 2022
61	C11H14NO3	Unknown	Unknown	plant biochar leachate	solid phase extraction, FT-ICR-MS	solid phase extraction, FT-ICR-MS	Other	Lignin	Other	Chen et al., 2022; Yan et al., 2022
62	C9H5O6	Unknown	Unknown	plant biochar leachate	solid phase extraction, FT-ICR-MS	solid phase extraction, FT-ICR-MS	Cond Hydrocarbon	Cond Hydrocarbon	Other	Chen et al., 2022; Yan et al., 2022
63	C6H9O6S	Unknown	Unknown	plant biochar leachate	solid phase extraction, FT-ICR-MS	solid phase extraction, FT-ICR-MS	Carbohydrate	Carbohydrate	Other	Chen et al., 2022
64	C10H9O5	Unknown	Unknown	plant biochar leachate	solid phase extraction, FT-ICR-MS	solid phase extraction, FT-ICR-MS	Lignin	Lignin	Other	Chen et al., 2022; Yan et al., 2022
65	C7H13O5S	Unknown	Unknown	plant biochar leachate	solid phase extraction, FT-ICR-MS	solid phase extraction, FT-ICR-MS	Carbohydrate	Carbohydrate	Other	Chen et al., 2022
66	C9H9N2O4	Unknown	Unknown	plant biochar leachate	solid phase extraction, FT-ICR-MS	solid phase extraction, FT-ICR-MS	Lignin	Lignin	Protein	Chen et al., 2022; Yan et al., 2022
67	C14H9O2	Unknown	Unknown	plant biochar leachate	solid phase extraction, FT-ICR-MS	solid phase extraction, FT-ICR-MS	Cond Hydrocarbon	Cond Hydrocarbon	Other	Chen et al., 2022; Yan et al., 2022
68	C11H13O4	Unknown	Unknown	plant biochar leachate	solid phase extraction, FT-ICR-MS	solid phase extraction, FT-ICR-MS	Lignin	Lignin	Other	Chen et al., 2022; Yan et al., 2022
69	C10H13N2O3	Unknown	Unknown	plant biochar leachate	solid phase extraction, FT-ICR-MS	solid phase extraction, FT-ICR-MS	Lignin	Lignin	Protein	Chen et al., 2022
70	C12H17O3	Unknown	Unknown	plant biochar leachate	solid phase extraction, FT-ICR-MS	solid phase extraction, FT-ICR-MS	Other	Lignin	Other	Chen et al., 2022
71	C13H21O2	Unknown	Unknown	plant biochar leachate	solid phase extraction, FT-ICR-MS	solid phase extraction, FT-ICR-MS	Lipid	Lipid	Other	Chen et al., 2022
72	C14H25O	Unknown	Unknown	plant biochar leachate	solid phase extraction, FT-ICR-MS	solid phase extraction, FT-ICR-MS	Lipid	Lipid;Unsat Hydrocarbon	Other	Chen et al., 2022
73	C7H4N3O3S	Unknown	Unknown	plant biochar leachate	solid phase extraction, FT-ICR-MS	solid phase extraction, FT-ICR-MS	Cond Hydrocarbon	Cond Hydrocarbon	Other	Chen et al., 2022
74	C8H4NO6	Unknown	Unknown	plant biochar leachate	solid phase extraction, FT-ICR-MS	solid phase extraction, FT-ICR-MS	Other	Cond Hydrocarbon	Other	Chen et al., 2022; Yan et al., 2022
75	C9H8NO5	Unknown	Unknown	plant biochar leachate	solid phase extraction, FT-ICR-MS	solid phase extraction, FT-ICR-MS	Lignin	Lignin	Other	Chen et al., 2022; Yan et al., 2022
76	C13H8NO2	Unknown	Unknown	plant biochar leachate	solid phase extraction, FT-ICR-MS	solid phase extraction, FT-ICR-MS	Cond Hydrocarbon	Cond Hydrocarbon	Other	Chen et al., 2022
77	C10H12NO4	Unknown	Unknown	plant biochar leachate	solid phase extraction, FT-ICR-MS	solid phase extraction, FT-ICR-MS	Lignin	Lignin	Other	Chen et al., 2022; Yan et al., 2022
78	C11H16NO3	Unknown	Unknown	plant biochar leachate	solid phase extraction, FT-ICR-MS	solid phase extraction, FT-ICR-MS	Other	Lignin	Other	Chen et al., 2022
79	C7H3N2O4S	Unknown	Unknown	plant biochar leachate	solid phase extraction, FT-ICR-MS	solid phase extraction, FT-ICR-MS	Cond Hydrocarbon	Cond Hydrocarbon	Other	Chen et al., 2022
80	C13H7OS	Unknown	Unknown	plant biochar leachate	solid phase extraction, FT-ICR-MS	solid phase extraction, FT-ICR-MS	Other	Cond Hydrocarbon	Other	Chen et al., 2022
81	C9H7O6	Unknown	Unknown	plant biochar leachate	solid phase extraction, FT-ICR-MS	solid phase extraction, FT-ICR-MS	Tannin;Cond Hydrocarbon	Cond Hydrocarbon	Other	Chen et al., 2022; Yan et al., 2022
82	C8H7N2O5	Unknown	Unknown	plant biochar leachate	solid phase extraction, FT-ICR-MS	solid phase extraction, FT-ICR-MS	Lignin	Lignin	Other	Chen et al., 2022
83	C13H7O3	Unknown	Unknown	plant biochar leachate	solid phase extraction, FT-ICR-MS	solid phase extraction, FT-ICR-MS	Cond Hydrocarbon	Cond Hydrocarbon	Other	Chen et al., 2022; Yan et al., 2022
84	C10H11O5	Unknown	Unknown	plant biochar leachate	solid phase extraction, FT-ICR-MS	solid phase extraction, FT-ICR-MS	Lignin	Lignin	Other	Chen et al., 2022; Yan et al., 2022
85	C9H11N2O4	Unknown	Unknown	plant biochar leachate	solid phase extraction, FT-ICR-MS	solid phase extraction, FT-ICR-MS	Lignin	Lignin	Protein	Chen et al., 2022; Yan et al., 2022
86	C14H11O2	Unknown	Unknown	plant biochar leachate	solid phase extraction, FT-ICR-MS	solid phase extraction, FT-ICR-MS	Unsat Hydrocarbon;Cond Hydrocarbon	Cond Hydrocarbon	Other	Chen et al., 2022; Yan et al., 2022
87	C11H15O4	Unknown	Unknown	plant biochar leachate	solid phase extraction, FT-ICR-MS	solid phase extraction, FT-ICR-MS	Lignin	Lignin	Other	Chen et al., 2022; Yan et al., 2022
88	C10H15N2O3	Unknown	Unknown	plant biochar leachate	solid phase extraction, FT-ICR-MS	solid phase extraction, FT-ICR-MS	Protein	Lipid	Protein	Chen et al., 2022
89	C15H15O	Unknown	Unknown	plant biochar leachate	solid phase extraction, FT-ICR-MS	solid phase extraction, FT-ICR-MS	Unsat Hydrocarbon	Unsat Hydrocarbon	Other	Chen et al., 2022
90	C12H19O3	Unknown	Unknown	plant biochar leachate	solid phase extraction, FT-ICR-MS	solid phase extraction, FT-ICR-MS	Lipid	Lipid	Other	Chen et al., 2022
91	C14H27O	Unknown	Unknown	plant biochar leachate	solid phase extraction, FT-ICR-MS	solid phase extraction, FT-ICR-MS	Lipid	Lipid;Unsat Hydrocarbon	Other	Chen et al., 2022
92	C8H6NO6	Unknown	Unknown	plant biochar leachate	solid phase extraction, FT-ICR-MS	solid phase extraction, FT-ICR-MS	Tannin	Cond Hydrocarbon	Other	Chen et al., 2022
93	C12H6NO3	Unknown	Unknown	plant biochar leachate	solid phase extraction, FT-ICR-MS	solid phase extraction, FT-ICR-MS	Cond Hydrocarbon	Cond Hydrocarbon	Other	Chen et al., 2022; Yan et al., 2022
94	C9H10NO5	Unknown	Unknown	plant biochar leachate	solid phase extraction, FT-ICR-MS	solid phase extraction, FT-ICR-MS	Lignin	Lignin	Other	Chen et al., 2022; Yan et al., 2022
95	C13H10NO2	Unknown	Unknown	plant biochar leachate	solid phase extraction, FT-ICR-MS	solid phase extraction, FT-ICR-MS	Cond Hydrocarbon	Cond Hydrocarbon	Other	Chen et al., 2022
96	C10H14NO4	Unknown	Unknown	plant biochar leachate	solid phase extraction, FT-ICR-MS	solid phase extraction, FT-ICR-MS	Lignin	Lignin	Other	Chen et al., 2022
97	C11H18NO3	Unknown	Unknown	plant biochar leachate	solid phase extraction, FT-ICR-MS	solid phase extraction, FT-ICR-MS	Lipid	Lipid	Other	Chen et al., 2022
98	C8H5O5S	Unknown	Unknown	plant biochar leachate	solid phase extraction, FT-ICR-MS	solid phase extraction, FT-ICR-MS	Cond Hydrocarbon	Cond Hydrocarbon	Other	Chen et al., 2022
99	C8H5O7	Unknown	Unknown	plant biochar leachate	solid phase extraction, FT-ICR-MS	solid phase extraction, FT-ICR-MS	Other	Cond Hydrocarbon	Other	Chen et al., 2022; Yan et al., 2022
100	C12H5O4	Unknown	Unknown	plant biochar leachate	solid phase extraction, FT-ICR-MS	solid phase extraction, FT-ICR-MS	Cond Hydrocarbon	Cond Hydrocarbon	Other	Chen et al., 2022; Yan et al., 2022
101	C9H9O4S	Unknown	Unknown	plant biochar leachate	solid phase extraction, FT-ICR-MS	solid phase extraction, FT-ICR-MS	Lignin	Lignin	Other	Chen et al., 2022
102	C9H9O6	Unknown	Unknown	plant biochar leachate	solid phase extraction, FT-ICR-MS	solid phase extraction, FT-ICR-MS	Tannin	Tannin	Other	Chen et al., 2022; Yan et al., 2022
103	C13H9O3	Unknown	Unknown	plant biochar leachate	solid phase extraction, FT-ICR-MS	solid phase extraction, FT-ICR-MS	Cond Hydrocarbon	Cond Hydrocarbon	Other	Chen et al., 2022; Yan et al., 2022
104	C10H13O5	Unknown	Unknown	plant biochar leachate	solid phase extraction, FT-ICR-MS	solid phase extraction, FT-ICR-MS	Lignin	Lignin	Other	Chen et al., 2022; Yan et al., 2022
105	C9H13N2O4	Unknown	Unknown	plant biochar leachate	solid phase extraction, FT-ICR-MS	solid phase extraction, FT-ICR-MS	Lignin	Lignin	Protein	Chen et al., 2022
106	C14H13O2	Unknown	Unknown	plant biochar leachate	solid phase extraction, FT-ICR-MS	solid phase extraction, FT-ICR-MS	Unsat Hydrocarbon	Lignin	Other	Chen et al., 2022; Yan et al., 2022
107	C11H17O2S	Unknown	Unknown	plant biochar leachate	solid phase extraction, FT-ICR-MS	solid phase extraction, FT-ICR-MS	Other	Lipid	Other	Chen et al., 2022
108	C11H17O4	Unknown	Unknown	plant biochar leachate	solid phase extraction, FT-ICR-MS	solid phase extraction, FT-ICR-MS	Protein	Protein	Other	Chen et al., 2022; Yan et al., 2022
109	C11H4NO4	Unknown	Unknown	plant biochar leachate	solid phase extraction, FT-ICR-MS	solid phase extraction, FT-ICR-MS	Cond Hydrocarbon	Cond Hydrocarbon	Other	Chen et al., 2022; Yan et al., 2022
110	C7H8N3O3S	Unknown	Unknown	plant biochar leachate	solid phase extraction, FT-ICR-MS	solid phase extraction, FT-ICR-MS	Lignin	Lignin	Protein	Chen et al., 2022
111	C8H8NO6	Unknown	Unknown	plant biochar leachate	solid phase extraction, FT-ICR-MS	solid phase extraction, FT-ICR-MS	Tannin	Tannin	Other	Chen et al., 2022
112	C12H8NO3	Unknown	Unknown	plant biochar leachate	solid phase extraction, FT-ICR-MS	solid phase extraction, FT-ICR-MS	Cond Hydrocarbon	Cond Hydrocarbon	Other	Chen et al., 2022; Yan et al., 2022
113	C9H12NO5	Unknown	Unknown	plant biochar leachate	solid phase extraction, FT-ICR-MS	solid phase extraction, FT-ICR-MS	Lignin	Lignin	Other	Chen et al., 2022; Yan et al., 2022
114	C13H12NO2	Unknown	Unknown	plant biochar leachate	solid phase extraction, FT-ICR-MS	solid phase extraction, FT-ICR-MS	Other	Lignin	Other	Chen et al., 2022; Yan et al., 2022
115	C10H16NO4	Unknown	Unknown	plant biochar leachate	solid phase extraction, FT-ICR-MS	solid phase extraction, FT-ICR-MS	Protein	Protein	Other	Chen et al., 2022
116	C11H20NO3	Unknown	Unknown	plant biochar leachate	solid phase extraction, FT-ICR-MS	solid phase extraction, FT-ICR-MS	Lipid	Lipid	Other	Chen et al., 2022
117	C10H20N3O2	Unknown	Unknown	plant biochar leachate	solid phase extraction, FT-ICR-MS	solid phase extraction, FT-ICR-MS	Lipid	Lipid	Protein	Chen et al., 2022
118	C7H3O6S	Unknown	Unknown	plant biochar leachate	solid phase extraction, FT-ICR-MS	solid phase extraction, FT-ICR-MS	Other	Cond Hydrocarbon	Other	Chen et al., 2022
119	C8H7O5S	Unknown	Unknown	plant biochar leachate	solid phase extraction, FT-ICR-MS	solid phase extraction, FT-ICR-MS	Lignin	Lignin	Other	Chen et al., 2022
120	C8H7O7	Unknown	Unknown	plant biochar leachate	solid phase extraction, FT-ICR-MS	solid phase extraction, FT-ICR-MS	Tannin	Tannin	Other	Chen et al., 2022
121	C12H7O4	Unknown	Unknown	plant biochar leachate	solid phase extraction, FT-ICR-MS	solid phase extraction, FT-ICR-MS	Cond Hydrocarbon	Cond Hydrocarbon	Other	Chen et al., 2022; Yan et al., 2022
122	C9H11O6	Unknown	Unknown	plant biochar leachate	solid phase extraction, FT-ICR-MS	solid phase extraction, FT-ICR-MS	Tannin	Tannin	Other	Chen et al., 2022; Yan et al., 2022
123	C8H11N2O5	Unknown	Unknown	plant biochar leachate	solid phase extraction, FT-ICR-MS	solid phase extraction, FT-ICR-MS	Lignin;Amino Sugar	Lignin	Protein	Chen et al., 2022
124	C13H11O3	Unknown	Unknown	plant biochar leachate	solid phase extraction, FT-ICR-MS	solid phase extraction, FT-ICR-MS	Other	Lignin	Other	Chen et al., 2022; Yan et al., 2022
125	C10H15O5	Unknown	Unknown	plant biochar leachate	solid phase extraction, FT-ICR-MS	solid phase extraction, FT-ICR-MS	Protein	Protein	Other	Chen et al., 2022
126	C14H15O2	Unknown	Unknown	plant biochar leachate	solid phase extraction, FT-ICR-MS	solid phase extraction, FT-ICR-MS	Unsat Hydrocarbon	Lignin	Other	Chen et al., 2022
127	C11H19O4	Unknown	Unknown	plant biochar leachate	solid phase extraction, FT-ICR-MS	solid phase extraction, FT-ICR-MS	Protein	Protein	Other	Chen et al., 2022; Yan et al., 2022
128	C15H19O	Unknown	Unknown	plant biochar leachate	solid phase extraction, FT-ICR-MS	solid phase extraction, FT-ICR-MS	Unsat Hydrocarbon	Unsat Hydrocarbon	Other	Chen et al., 2022
129	C10H6N3OS	Unknown	Unknown	plant biochar leachate	solid phase extraction, FT-ICR-MS	solid phase extraction, FT-ICR-MS	Other	Cond Hydrocarbon	Other	Chen et al., 2022
130	C11H6NO4	Unknown	Unknown	plant biochar leachate	solid phase extraction, FT-ICR-MS	solid phase extraction, FT-ICR-MS	Cond Hydrocarbon	Cond Hydrocarbon	Other	Chen et al., 2022; Yan et al., 2022
131	C8H10NO6	Unknown	Unknown	plant biochar leachate	solid phase extraction, FT-ICR-MS	solid phase extraction, FT-ICR-MS	Tannin	Tannin	Other	Chen et al., 2022
132	C12H10NO3	Unknown	Unknown	plant biochar leachate	solid phase extraction, FT-ICR-MS	solid phase extraction, FT-ICR-MS	Other	Lignin	Other	Chen et al., 2022; Yan et al., 2022
133	C9H14NO5	Unknown	Unknown	plant biochar leachate	solid phase extraction, FT-ICR-MS	solid phase extraction, FT-ICR-MS	Amino Sugar	Amino Sugar	Other	Chen et al., 2022
134	C13H14NO2	Unknown	Unknown	plant biochar leachate	solid phase extraction, FT-ICR-MS	solid phase extraction, FT-ICR-MS	Other	Lignin	Other	Chen et al., 2022
135	C10H18NO4	Unknown	Unknown	plant biochar leachate	solid phase extraction, FT-ICR-MS	solid phase extraction, FT-ICR-MS	Protein	Protein	Other	Chen et al., 2022
136	C14H18NO	Unknown	Unknown	plant biochar leachate	solid phase extraction, FT-ICR-MS	solid phase extraction, FT-ICR-MS	Unsat Hydrocarbon	Unsat Hydrocarbon	Other	Chen et al., 2022
137	C7H5O6S	Unknown	Unknown	plant biochar leachate	solid phase extraction, FT-ICR-MS	solid phase extraction, FT-ICR-MS	Tannin	Cond Hydrocarbon	Other	Chen et al., 2022
138	C11H5O5	Unknown	Unknown	plant biochar leachate	solid phase extraction, FT-ICR-MS	solid phase extraction, FT-ICR-MS	Cond Hydrocarbon	Cond Hydrocarbon	Other	Chen et al., 2022; Yan et al., 2022
139	C8H9O5S	Unknown	Unknown	plant biochar leachate	solid phase extraction, FT-ICR-MS	solid phase extraction, FT-ICR-MS	Lignin	Lignin	Other	Chen et al., 2022
140	C8H9O7	Unknown	Unknown	plant biochar leachate	solid phase extraction, FT-ICR-MS	solid phase extraction, FT-ICR-MS	Tannin	Tannin	Other	Chen et al., 2022
141	C12H9O4	Unknown	Unknown	plant biochar leachate	solid phase extraction, FT-ICR-MS	solid phase extraction, FT-ICR-MS	Cond Hydrocarbon	Cond Hydrocarbon	Other	Chen et al., 2022; Yan et al., 2022
142	C13H13OS	Unknown	Unknown	plant biochar leachate	solid phase extraction, FT-ICR-MS	solid phase extraction, FT-ICR-MS	Unsat Hydrocarbon	Unsat Hydrocarbon	Other	Chen et al., 2022
143	C9H13O6	Unknown	Unknown	plant biochar leachate	solid phase extraction, FT-ICR-MS	solid phase extraction, FT-ICR-MS	Amino Sugar	Tannin	Other	Chen et al., 2022; Yan et al., 2022
144	C13H13O3	Unknown	Unknown	plant biochar leachate	solid phase extraction, FT-ICR-MS	solid phase extraction, FT-ICR-MS	Other	Lignin	Other	Chen et al., 2022; Yan et al., 2022
145	C10H17O5	Unknown	Unknown	plant biochar leachate	solid phase extraction, FT-ICR-MS	solid phase extraction, FT-ICR-MS	Protein	Protein	Other	Chen et al., 2022; Yan et al., 2022
146	C14H17O2	Unknown	Unknown	plant biochar leachate	solid phase extraction, FT-ICR-MS	solid phase extraction, FT-ICR-MS	Unsat Hydrocarbon	Lignin	Other	Chen et al., 2022
147	C10H4NO5	Unknown	Unknown	plant biochar leachate	solid phase extraction, FT-ICR-MS	solid phase extraction, FT-ICR-MS	Cond Hydrocarbon	Cond Hydrocarbon	Other	Chen et al., 2022
148	C11H8NO4	Unknown	Unknown	plant biochar leachate	solid phase extraction, FT-ICR-MS	solid phase extraction, FT-ICR-MS	Cond Hydrocarbon	Cond Hydrocarbon	Other	Chen et al., 2022; Yan et al., 2022
149	C8H12NO6	Unknown	Unknown	plant biochar leachate	solid phase extraction, FT-ICR-MS	solid phase extraction, FT-ICR-MS	Carbohydrate	Carbohydrate	Other	Chen et al., 2022
150	C12H12NO3	Unknown	Unknown	plant biochar leachate	solid phase extraction, FT-ICR-MS	solid phase extraction, FT-ICR-MS	Other	Lignin	Other	Chen et al., 2022; Yan et al., 2022
151	C9H16NO5	Unknown	Unknown	plant biochar leachate	solid phase extraction, FT-ICR-MS	solid phase extraction, FT-ICR-MS	Amino Sugar	Amino Sugar	Other	Chen et al., 2022
152	C10H3O6	Unknown	Unknown	plant biochar leachate	solid phase extraction, FT-ICR-MS	solid phase extraction, FT-ICR-MS	Cond Hydrocarbon	Cond Hydrocarbon	Other	Chen et al., 2022
153	C7H7O6S	Unknown	Unknown	plant biochar leachate	solid phase extraction, FT-ICR-MS	solid phase extraction, FT-ICR-MS	Tannin	Tannin	Other	Chen et al., 2022
154	C11H7O5	Unknown	Unknown	plant biochar leachate	solid phase extraction, FT-ICR-MS	solid phase extraction, FT-ICR-MS	Cond Hydrocarbon	Cond Hydrocarbon	Other	Chen et al., 2022; Yan et al., 2022
155	C8H11O5S	Unknown	Unknown	plant biochar leachate	solid phase extraction, FT-ICR-MS	solid phase extraction, FT-ICR-MS	Lignin;Amino Sugar	Lignin	Other	Chen et al., 2022
156	C10H7N2O4	Unknown	Unknown	plant biochar leachate	solid phase extraction, FT-ICR-MS	solid phase extraction, FT-ICR-MS	Cond Hydrocarbon	Cond Hydrocarbon	Other	Chen et al., 2022; Yan et al., 2022
157	C8H11O7	Unknown	Unknown	plant biochar leachate	solid phase extraction, FT-ICR-MS	solid phase extraction, FT-ICR-MS	Other	Tannin	Other	Chen et al., 2022
158	C12H11O4	Unknown	Unknown	plant biochar leachate	solid phase extraction, FT-ICR-MS	solid phase extraction, FT-ICR-MS	Lignin	Lignin	Other	Chen et al., 2022; Yan et al., 2022
159	C11H11N2O3	Unknown	Unknown	plant biochar leachate	solid phase extraction, FT-ICR-MS	solid phase extraction, FT-ICR-MS	Other	Lignin	Protein	Chen et al., 2022; Yan et al., 2022
160	C9H15O6	Unknown	Unknown	plant biochar leachate	solid phase extraction, FT-ICR-MS	solid phase extraction, FT-ICR-MS	Amino Sugar	Amino Sugar	Other	Chen et al., 2022
161	C13H15O3	Unknown	Unknown	plant biochar leachate	solid phase extraction, FT-ICR-MS	solid phase extraction, FT-ICR-MS	Other	Lignin	Other	Chen et al., 2022
162	C12H15N2O2	Unknown	Unknown	plant biochar leachate	solid phase extraction, FT-ICR-MS	solid phase extraction, FT-ICR-MS	Other	Lignin	Protein	Chen et al., 2022
163	C10H6NO5	Unknown	Unknown	plant biochar leachate	solid phase extraction, FT-ICR-MS	solid phase extraction, FT-ICR-MS	Cond Hydrocarbon	Cond Hydrocarbon	Other	Chen et al., 2022; Yan et al., 2022
164	C11H10NO4	Unknown	Unknown	plant biochar leachate	solid phase extraction, FT-ICR-MS	solid phase extraction, FT-ICR-MS	Lignin	Lignin	Other	Chen et al., 2022; Yan et al., 2022
165	C7H14N3O3S	Unknown	Unknown	plant biochar leachate	solid phase extraction, FT-ICR-MS	solid phase extraction, FT-ICR-MS	Protein	Protein	Protein	Chen et al., 2022
166	C12H14NO3	Unknown	Unknown	plant biochar leachate	solid phase extraction, FT-ICR-MS	solid phase extraction, FT-ICR-MS	Other	Lignin	Other	Chen et al., 2022; Yan et al., 2022
167	C6H5O7S	Unknown	Unknown	plant biochar leachate	solid phase extraction, FT-ICR-MS	solid phase extraction, FT-ICR-MS	Other	Other	Other	Chen et al., 2022
168	C10H5O4S	Unknown	Unknown	plant biochar leachate	solid phase extraction, FT-ICR-MS	solid phase extraction, FT-ICR-MS	Cond Hydrocarbon	Cond Hydrocarbon	Other	Chen et al., 2022
169	C10H5O6	Unknown	Unknown	plant biochar leachate	solid phase extraction, FT-ICR-MS	solid phase extraction, FT-ICR-MS	Cond Hydrocarbon	Cond Hydrocarbon	Other	Chen et al., 2022; Yan et al., 2022
170	C7H9O6S	Unknown	Unknown	plant biochar leachate	solid phase extraction, FT-ICR-MS	solid phase extraction, FT-ICR-MS	Tannin	Tannin	Other	Chen et al., 2022
171	C9H5N2O5	Unknown	Unknown	plant biochar leachate	solid phase extraction, FT-ICR-MS	solid phase extraction, FT-ICR-MS	Cond Hydrocarbon	Cond Hydrocarbon	Other	Chen et al., 2022; Yan et al., 2022
172	C6H9N2O5S	Unknown	Unknown	plant biochar leachate	solid phase extraction, FT-ICR-MS	solid phase extraction, FT-ICR-MS	Carbohydrate	Carbohydrate	Protein	Chen et al., 2022
173	C6H9N2O7	Unknown	Unknown	plant biochar leachate	solid phase extraction, FT-ICR-MS	solid phase extraction, FT-ICR-MS	Other	Carbohydrate	Other	Chen et al., 2022
174	C11H9O5	Unknown	Unknown	plant biochar leachate	solid phase extraction, FT-ICR-MS	solid phase extraction, FT-ICR-MS	Lignin	Lignin	Other	Chen et al., 2022; Yan et al., 2022
175	C10H9N2O4	Unknown	Unknown	plant biochar leachate	solid phase extraction, FT-ICR-MS	solid phase extraction, FT-ICR-MS	Lignin	Lignin	Other	Chen et al., 2022; Yan et al., 2022
176	C15H9O2	Unknown	Unknown	plant biochar leachate	solid phase extraction, FT-ICR-MS	solid phase extraction, FT-ICR-MS	Cond Hydrocarbon	Cond Hydrocarbon	Other	Chen et al., 2022
177	C8H13O7	Unknown	Unknown	plant biochar leachate	solid phase extraction, FT-ICR-MS	solid phase extraction, FT-ICR-MS	Carbohydrate	Carbohydrate	Other	Chen et al., 2022
178	C12H13O4	Unknown	Unknown	plant biochar leachate	solid phase extraction, FT-ICR-MS	solid phase extraction, FT-ICR-MS	Lignin	Lignin	Other	Chen et al., 2022; Yan et al., 2022
179	C11H13N2O3	Unknown	Unknown	plant biochar leachate	solid phase extraction, FT-ICR-MS	solid phase extraction, FT-ICR-MS	Other	Lignin	Protein	Chen et al., 2022
180	C13H17O3	Unknown	Unknown	plant biochar leachate	solid phase extraction, FT-ICR-MS	solid phase extraction, FT-ICR-MS	Other	Lignin	Other	Chen et al., 2022
181	C9H4NO6	Unknown	Unknown	plant biochar leachate	solid phase extraction, FT-ICR-MS	solid phase extraction, FT-ICR-MS	Cond Hydrocarbon	Cond Hydrocarbon	Other	Chen et al., 2022; Yan et al., 2022
182	C10H8NO5	Unknown	Unknown	plant biochar leachate	solid phase extraction, FT-ICR-MS	solid phase extraction, FT-ICR-MS	Cond Hydrocarbon	Lignin	Other	Chen et al., 2022; Yan et al., 2022
183	C11H12NO4	Unknown	Unknown	plant biochar leachate	solid phase extraction, FT-ICR-MS	solid phase extraction, FT-ICR-MS	Lignin	Lignin	Other	Chen et al., 2022; Yan et al., 2022
184	C12H16NO3	Unknown	Unknown	plant biochar leachate	solid phase extraction, FT-ICR-MS	solid phase extraction, FT-ICR-MS	Other	Lignin	Other	Chen et al., 2022
185	C9H3O7	Unknown	Unknown	plant biochar leachate	solid phase extraction, FT-ICR-MS	solid phase extraction, FT-ICR-MS	Other	Cond Hydrocarbon	Other	Chen et al., 2022
186	C6H7O7S	Unknown	Unknown	plant biochar leachate	solid phase extraction, FT-ICR-MS	solid phase extraction, FT-ICR-MS	Other	Other	Other	Chen et al., 2022
187	C10H7O4S	Unknown	Unknown	plant biochar leachate	solid phase extraction, FT-ICR-MS	solid phase extraction, FT-ICR-MS	Cond Hydrocarbon	Cond Hydrocarbon	Other	Chen et al., 2022
188	C12H3N2O3	Unknown	Unknown	plant biochar leachate	solid phase extraction, FT-ICR-MS	solid phase extraction, FT-ICR-MS	Other	Cond Hydrocarbon	Other	Chen et al., 2022
189	C10H7O6	Unknown	Unknown	plant biochar leachate	solid phase extraction, FT-ICR-MS	solid phase extraction, FT-ICR-MS	Cond Hydrocarbon	Cond Hydrocarbon	Other	Chen et al., 2022; Yan et al., 2022
190	C7H11O6S	Unknown	Unknown	plant biochar leachate	solid phase extraction, FT-ICR-MS	solid phase extraction, FT-ICR-MS	Carbohydrate	Carbohydrate	Other	Chen et al., 2022
191	C9H7N2O5	Unknown	Unknown	plant biochar leachate	solid phase extraction, FT-ICR-MS	solid phase extraction, FT-ICR-MS	Cond Hydrocarbon	Cond Hydrocarbon	Other	Chen et al., 2022; Yan et al., 2022
192	C14H7O3	Unknown	Unknown	plant biochar leachate	solid phase extraction, FT-ICR-MS	solid phase extraction, FT-ICR-MS	Cond Hydrocarbon	Cond Hydrocarbon	Other	Chen et al., 2022; Yan et al., 2022
193	C11H11O5	Unknown	Unknown	plant biochar leachate	solid phase extraction, FT-ICR-MS	solid phase extraction, FT-ICR-MS	Lignin	Lignin	Other	Chen et al., 2022; Yan et al., 2022
194	C10H11N2O4	Unknown	Unknown	plant biochar leachate	solid phase extraction, FT-ICR-MS	solid phase extraction, FT-ICR-MS	Lignin	Lignin	Protein	Chen et al., 2022; Yan et al., 2022
195	C15H11O2	Unknown	Unknown	plant biochar leachate	solid phase extraction, FT-ICR-MS	solid phase extraction, FT-ICR-MS	Unsat Hydrocarbon;Cond Hydrocarbon	Cond Hydrocarbon	Other	Chen et al., 2022; Yan et al., 2022
196	C8H15O7	Unknown	Unknown	plant biochar leachate	solid phase extraction, FT-ICR-MS	solid phase extraction, FT-ICR-MS	Carbohydrate	Carbohydrate	Carbohydrate	Chen et al., 2022
197	C12H15O4	Unknown	Unknown	plant biochar leachate	solid phase extraction, FT-ICR-MS	solid phase extraction, FT-ICR-MS	Lignin	Lignin	Other	Chen et al., 2022
198	C9H19O4S	Unknown	Unknown	plant biochar leachate	solid phase extraction, FT-ICR-MS	solid phase extraction, FT-ICR-MS	Other	Protein	Other	Chen et al., 2022
199	C11H15N2O3	Unknown	Unknown	plant biochar leachate	solid phase extraction, FT-ICR-MS	solid phase extraction, FT-ICR-MS	Other	Lignin	Protein	Chen et al., 2022
200	C9H6NO4S	Unknown	Unknown	plant biochar leachate	solid phase extraction, FT-ICR-MS	solid phase extraction, FT-ICR-MS	Cond Hydrocarbon	Cond Hydrocarbon	Other	Chen et al., 2022
201	C9H6NO6	Unknown	Unknown	plant biochar leachate	solid phase extraction, FT-ICR-MS	solid phase extraction, FT-ICR-MS	Cond Hydrocarbon	Cond Hydrocarbon	Other	Chen et al., 2022; Yan et al., 2022
202	C5H10N3O5S	Unknown	Unknown	plant biochar leachate	solid phase extraction, FT-ICR-MS	solid phase extraction, FT-ICR-MS	Carbohydrate	Carbohydrate	Protein	Chen et al., 2022
203	C13H6NO3	Unknown	Unknown	plant biochar leachate	solid phase extraction, FT-ICR-MS	solid phase extraction, FT-ICR-MS	Cond Hydrocarbon	Cond Hydrocarbon	Other	Chen et al., 2022
204	C10H10NO5	Unknown	Unknown	plant biochar leachate	solid phase extraction, FT-ICR-MS	solid phase extraction, FT-ICR-MS	Lignin	Lignin	Other	Chen et al., 2022; Yan et al., 2022
205	C11H14NO4	Unknown	Unknown	plant biochar leachate	solid phase extraction, FT-ICR-MS	solid phase extraction, FT-ICR-MS	Lignin	Lignin	Other	Chen et al., 2022; Yan et al., 2022
206	C10H14N3O3	Unknown	Unknown	plant biochar leachate	solid phase extraction, FT-ICR-MS	solid phase extraction, FT-ICR-MS	Lignin	Lignin	Protein	Chen et al., 2022
207	C15H14NO	Unknown	Unknown	plant biochar leachate	solid phase extraction, FT-ICR-MS	solid phase extraction, FT-ICR-MS	Unsat Hydrocarbon	Unsat Hydrocarbon	Other	Chen et al., 2022
208	C12H18NOS	Unknown	Unknown	plant biochar leachate	solid phase extraction, FT-ICR-MS	solid phase extraction, FT-ICR-MS	Unsat Hydrocarbon	Lipid;Unsat Hydrocarbon	Other	Chen et al., 2022
209	C9H5O7	Unknown	Unknown	plant biochar leachate	solid phase extraction, FT-ICR-MS	solid phase extraction, FT-ICR-MS	Other	Cond Hydrocarbon	Other	Chen et al., 2022; Yan et al., 2022
210	C8H5N2O6	Unknown	Unknown	plant biochar leachate	solid phase extraction, FT-ICR-MS	solid phase extraction, FT-ICR-MS	Other	Cond Hydrocarbon	Other	Chen et al., 2022; Yan et al., 2022
211	C10H9O4S	Unknown	Unknown	plant biochar leachate	solid phase extraction, FT-ICR-MS	solid phase extraction, FT-ICR-MS	Lignin	Lignin	Other	Chen et al., 2022
212	C10H9O6	Unknown	Unknown	plant biochar leachate	solid phase extraction, FT-ICR-MS	solid phase extraction, FT-ICR-MS	Lignin	Lignin	Other	Chen et al., 2022; Yan et al., 2022
213	C9H9N2O5	Unknown	Unknown	plant biochar leachate	solid phase extraction, FT-ICR-MS	solid phase extraction, FT-ICR-MS	Lignin	Lignin	Protein	Chen et al., 2022
214	C14H9O3	Unknown	Unknown	plant biochar leachate	solid phase extraction, FT-ICR-MS	solid phase extraction, FT-ICR-MS	Cond Hydrocarbon	Cond Hydrocarbon	Other	Chen et al., 2022; Yan et al., 2022
215	C11H13O5	Unknown	Unknown	plant biochar leachate	solid phase extraction, FT-ICR-MS	solid phase extraction, FT-ICR-MS	Lignin	Lignin	Other	Chen et al., 2022; Yan et al., 2022
216	C10H13N2O4	Unknown	Unknown	plant biochar leachate	solid phase extraction, FT-ICR-MS	solid phase extraction, FT-ICR-MS	Lignin	Lignin	Protein	Chen et al., 2022; Yan et al., 2022
217	C15H13O2	Unknown	Unknown	plant biochar leachate	solid phase extraction, FT-ICR-MS	solid phase extraction, FT-ICR-MS	Unsat Hydrocarbon	Lignin	Other	Chen et al., 2022; Yan et al., 2022
218	C12H17O2S	Unknown	Unknown	plant biochar leachate	solid phase extraction, FT-ICR-MS	solid phase extraction, FT-ICR-MS	Other	Lignin	Other	Chen et al., 2022
219	C12H17O4	Unknown	Unknown	plant biochar leachate	solid phase extraction, FT-ICR-MS	solid phase extraction, FT-ICR-MS	Lignin	Lignin	Other	Chen et al., 2022; Yan et al., 2022
220	C11H17N2O3	Unknown	Unknown	plant biochar leachate	solid phase extraction, FT-ICR-MS	solid phase extraction, FT-ICR-MS	Other	Lipid	Protein	Chen et al., 2022
221	C8H4NO7	Unknown	Unknown	plant biochar leachate	solid phase extraction, FT-ICR-MS	solid phase extraction, FT-ICR-MS	Other	Cond Hydrocarbon	Other	Chen et al., 2022; Yan et al., 2022
222	C9H8NO6	Unknown	Unknown	plant biochar leachate	solid phase extraction, FT-ICR-MS	solid phase extraction, FT-ICR-MS	Tannin	Tannin	Other	Chen et al., 2022; Yan et al., 2022
223	C13H8NO3	Unknown	Unknown	plant biochar leachate	solid phase extraction, FT-ICR-MS	solid phase extraction, FT-ICR-MS	Cond Hydrocarbon	Cond Hydrocarbon	Other	Chen et al., 2022; Yan et al., 2022
224	C9H12N3O2S	Unknown	Unknown	plant biochar leachate	solid phase extraction, FT-ICR-MS	solid phase extraction, FT-ICR-MS	Other	Lignin	Protein	Chen et al., 2022
225	C10H12NO5	Unknown	Unknown	plant biochar leachate	solid phase extraction, FT-ICR-MS	solid phase extraction, FT-ICR-MS	Lignin	Lignin	Other	Chen et al., 2022; Yan et al., 2022
226	C14H12NO2	Unknown	Unknown	plant biochar leachate	solid phase extraction, FT-ICR-MS	solid phase extraction, FT-ICR-MS	Unsat Hydrocarbon	Lignin	Other	Chen et al., 2022
227	C11H16NO4	Unknown	Unknown	plant biochar leachate	solid phase extraction, FT-ICR-MS	solid phase extraction, FT-ICR-MS	Protein	Lignin	Other	Chen et al., 2022
228	C12H20NO3	Unknown	Unknown	plant biochar leachate	solid phase extraction, FT-ICR-MS	solid phase extraction, FT-ICR-MS	Lipid	Lipid	Other	Chen et al., 2022
229	C13H24NO2	Unknown	Unknown	plant biochar leachate	solid phase extraction, FT-ICR-MS	solid phase extraction, FT-ICR-MS	Lipid	Lipid	Other	Chen et al., 2022
230	C8H3O8	Unknown	Unknown	plant biochar leachate	solid phase extraction, FT-ICR-MS	solid phase extraction, FT-ICR-MS	Other	Other	Other	Chen et al., 2022; Yan et al., 2022
231	C9H7O5S	Unknown	Unknown	plant biochar leachate	solid phase extraction, FT-ICR-MS	solid phase extraction, FT-ICR-MS	Cond Hydrocarbon	Cond Hydrocarbon	Other	Chen et al., 2022
232	C11H3N2O4	Unknown	Unknown	plant biochar leachate	solid phase extraction, FT-ICR-MS	solid phase extraction, FT-ICR-MS	Other	Cond Hydrocarbon	Other	Chen et al., 2022
233	C9H7O7	Unknown	Unknown	plant biochar leachate	solid phase extraction, FT-ICR-MS	solid phase extraction, FT-ICR-MS	Tannin	Cond Hydrocarbon	Other	Chen et al., 2022; Yan et al., 2022
234	C13H7O4	Unknown	Unknown	plant biochar leachate	solid phase extraction, FT-ICR-MS	solid phase extraction, FT-ICR-MS	Cond Hydrocarbon	Cond Hydrocarbon	Other	Chen et al., 2022; Yan et al., 2022
235	C10H11O6	Unknown	Unknown	plant biochar leachate	solid phase extraction, FT-ICR-MS	solid phase extraction, FT-ICR-MS	Lignin	Lignin	Other	Chen et al., 2022; Yan et al., 2022
236	C9H11N2O5	Unknown	Unknown	plant biochar leachate	solid phase extraction, FT-ICR-MS	solid phase extraction, FT-ICR-MS	Lignin	Lignin	Protein	Chen et al., 2022
237	C14H11O3	Unknown	Unknown	plant biochar leachate	solid phase extraction, FT-ICR-MS	solid phase extraction, FT-ICR-MS	Cond Hydrocarbon	Cond Hydrocarbon	Other	Chen et al., 2022; Yan et al., 2022
238	C11H15O5	Unknown	Unknown	plant biochar leachate	solid phase extraction, FT-ICR-MS	solid phase extraction, FT-ICR-MS	Lignin	Lignin	Other	Chen et al., 2022; Yan et al., 2022
239	C10H15N2O4	Unknown	Unknown	plant biochar leachate	solid phase extraction, FT-ICR-MS	solid phase extraction, FT-ICR-MS	Protein	Protein	Protein	Chen et al., 2022
240	C15H15O2	Unknown	Unknown	plant biochar leachate	solid phase extraction, FT-ICR-MS	solid phase extraction, FT-ICR-MS	Unsat Hydrocarbon	Lignin	Other	Chen et al., 2022
241	C12H19O4	Unknown	Unknown	plant biochar leachate	solid phase extraction, FT-ICR-MS	solid phase extraction, FT-ICR-MS	Protein	Protein	Other	Chen et al., 2022; Yan et al., 2022
242	C15H31O	Unknown	Unknown	plant biochar leachate	solid phase extraction, FT-ICR-MS	solid phase extraction, FT-ICR-MS	Lipid	Lipid;Unsat Hydrocarbon	Other	Chen et al., 2022
243	C8H6NO7	Unknown	Unknown	plant biochar leachate	solid phase extraction, FT-ICR-MS	solid phase extraction, FT-ICR-MS	Tannin	Cond Hydrocarbon	Other	Chen et al., 2022
244	C12H6NO4	Unknown	Unknown	plant biochar leachate	solid phase extraction, FT-ICR-MS	solid phase extraction, FT-ICR-MS	Cond Hydrocarbon	Cond Hydrocarbon	Other	Chen et al., 2022; Yan et al., 2022
245	C9H10NO6	Unknown	Unknown	plant biochar leachate	solid phase extraction, FT-ICR-MS	solid phase extraction, FT-ICR-MS	Tannin	Tannin	Other	Chen et al., 2022
246	C13H10NO3	Unknown	Unknown	plant biochar leachate	solid phase extraction, FT-ICR-MS	solid phase extraction, FT-ICR-MS	Cond Hydrocarbon	Cond Hydrocarbon	Other	Chen et al., 2022; Yan et al., 2022
247	C12H10N3O2	Unknown	Unknown	plant biochar leachate	solid phase extraction, FT-ICR-MS	solid phase extraction, FT-ICR-MS	Other	Lignin	Other	Chen et al., 2022
248	C10H14NO5	Unknown	Unknown	plant biochar leachate	solid phase extraction, FT-ICR-MS	solid phase extraction, FT-ICR-MS	Lignin	Lignin	Other	Chen et al., 2022; Yan et al., 2022
249	C14H14NO2	Unknown	Unknown	plant biochar leachate	solid phase extraction, FT-ICR-MS	solid phase extraction, FT-ICR-MS	Unsat Hydrocarbon	Lignin	Other	Chen et al., 2022
250	C11H18NO4	Unknown	Unknown	plant biochar leachate	solid phase extraction, FT-ICR-MS	solid phase extraction, FT-ICR-MS	Protein	Protein	Other	Chen et al., 2022
251	C12H22NO3	Unknown	Unknown	plant biochar leachate	solid phase extraction, FT-ICR-MS	solid phase extraction, FT-ICR-MS	Lipid	Lipid	Other	Chen et al., 2022
252	C8H5O6S	Unknown	Unknown	plant biochar leachate	solid phase extraction, FT-ICR-MS	solid phase extraction, FT-ICR-MS	Other	Cond Hydrocarbon	Other	Chen et al., 2022
253	C8H5O8	Unknown	Unknown	plant biochar leachate	solid phase extraction, FT-ICR-MS	solid phase extraction, FT-ICR-MS	Other	Other	Other	Chen et al., 2022; Yan et al., 2022
254	C12H5O5	Unknown	Unknown	plant biochar leachate	solid phase extraction, FT-ICR-MS	solid phase extraction, FT-ICR-MS	Cond Hydrocarbon	Cond Hydrocarbon	Other	Chen et al., 2022; Yan et al., 2022
255	C9H9O5S	Unknown	Unknown	plant biochar leachate	solid phase extraction, FT-ICR-MS	solid phase extraction, FT-ICR-MS	Lignin	Lignin	Other	Chen et al., 2022
256	C9H9O7	Unknown	Unknown	plant biochar leachate	solid phase extraction, FT-ICR-MS	solid phase extraction, FT-ICR-MS	Tannin	Tannin	Other	Chen et al., 2022; Yan et al., 2022
257	C13H9O4	Unknown	Unknown	plant biochar leachate	solid phase extraction, FT-ICR-MS	solid phase extraction, FT-ICR-MS	Cond Hydrocarbon	Cond Hydrocarbon	Other	Chen et al., 2022; Yan et al., 2022
258	C10H13O4S	Unknown	Unknown	plant biochar leachate	solid phase extraction, FT-ICR-MS	solid phase extraction, FT-ICR-MS	Lignin	Lignin	Other	Chen et al., 2022
259	C10H13O6	Unknown	Unknown	plant biochar leachate	solid phase extraction, FT-ICR-MS	solid phase extraction, FT-ICR-MS	Lignin	Lignin	Other	Chen et al., 2022; Yan et al., 2022
260	C9H13N2O5	Unknown	Unknown	plant biochar leachate	solid phase extraction, FT-ICR-MS	solid phase extraction, FT-ICR-MS	Lignin;Amino Sugar	Lignin	Protein	Chen et al., 2022
261	C14H13O3	Unknown	Unknown	plant biochar leachate	solid phase extraction, FT-ICR-MS	solid phase extraction, FT-ICR-MS	Other	Lignin	Other	Chen et al., 2022; Yan et al., 2022
262	C11H17O5	Unknown	Unknown	plant biochar leachate	solid phase extraction, FT-ICR-MS	solid phase extraction, FT-ICR-MS	Protein	Protein	Other	Chen et al., 2022
263	C10H17N2O4	Unknown	Unknown	plant biochar leachate	solid phase extraction, FT-ICR-MS	solid phase extraction, FT-ICR-MS	Protein	Protein	Protein	Chen et al., 2022
264	C15H17O2	Unknown	Unknown	plant biochar leachate	solid phase extraction, FT-ICR-MS	solid phase extraction, FT-ICR-MS	Unsat Hydrocarbon	Lignin	Other	Chen et al., 2022
265	C12H21O4	Unknown	Unknown	plant biochar leachate	solid phase extraction, FT-ICR-MS	solid phase extraction, FT-ICR-MS	Protein	Protein	Other	Chen et al., 2022; Yan et al., 2022
266	C13H25O3	Unknown	Unknown	plant biochar leachate	solid phase extraction, FT-ICR-MS	solid phase extraction, FT-ICR-MS	Lipid	Lipid	Other	Chen et al., 2022
267	C14H29O2	Unknown	Unknown	plant biochar leachate	solid phase extraction, FT-ICR-MS	solid phase extraction, FT-ICR-MS	Lipid	Lipid	Other	Chen et al., 2022
268	C11H4NO5	Unknown	Unknown	plant biochar leachate	solid phase extraction, FT-ICR-MS	solid phase extraction, FT-ICR-MS	Cond Hydrocarbon	Cond Hydrocarbon	Other	Chen et al., 2022
269	C8H8NO7	Unknown	Unknown	plant biochar leachate	solid phase extraction, FT-ICR-MS	solid phase extraction, FT-ICR-MS	Tannin	Tannin	Other	Chen et al., 2022
270	C7H8N3O6	Unknown	Unknown	plant biochar leachate	solid phase extraction, FT-ICR-MS	solid phase extraction, FT-ICR-MS	Tannin	Tannin	Other	Chen et al., 2022
271	C12H8NO4	Unknown	Unknown	plant biochar leachate	solid phase extraction, FT-ICR-MS	solid phase extraction, FT-ICR-MS	Cond Hydrocarbon	Cond Hydrocarbon	Other	Chen et al., 2022; Yan et al., 2022
272	C9H12NO6	Unknown	Unknown	plant biochar leachate	solid phase extraction, FT-ICR-MS	solid phase extraction, FT-ICR-MS	Other	Tannin	Other	Chen et al., 2022
273	C13H12NO3	Unknown	Unknown	plant biochar leachate	solid phase extraction, FT-ICR-MS	solid phase extraction, FT-ICR-MS	Other	Lignin	Other	Chen et al., 2022; Yan et al., 2022
274	C10H16NO5	Unknown	Unknown	plant biochar leachate	solid phase extraction, FT-ICR-MS	solid phase extraction, FT-ICR-MS	Protein	Protein	Other	Chen et al., 2022
275	C11H20NO4	Unknown	Unknown	plant biochar leachate	solid phase extraction, FT-ICR-MS	solid phase extraction, FT-ICR-MS	Protein	Protein	Other	Chen et al., 2022
276	C11H3O6	Unknown	Unknown	plant biochar leachate	solid phase extraction, FT-ICR-MS	solid phase extraction, FT-ICR-MS	Other	Cond Hydrocarbon	Other	Chen et al., 2022
277	C8H7O6S	Unknown	Unknown	plant biochar leachate	solid phase extraction, FT-ICR-MS	solid phase extraction, FT-ICR-MS	Tannin	Tannin	Other	Chen et al., 2022
278	C8H7O8	Unknown	Unknown	plant biochar leachate	solid phase extraction, FT-ICR-MS	solid phase extraction, FT-ICR-MS	Tannin	Tannin	Other	Chen et al., 2022
279	C11H7N2O2S	Unknown	Unknown	plant biochar leachate	solid phase extraction, FT-ICR-MS	solid phase extraction, FT-ICR-MS	Cond Hydrocarbon	Cond Hydrocarbon	Other	Chen et al., 2022
280	C12H7O5	Unknown	Unknown	plant biochar leachate	solid phase extraction, FT-ICR-MS	solid phase extraction, FT-ICR-MS	Cond Hydrocarbon	Cond Hydrocarbon	Other	Chen et al., 2022; Yan et al., 2022
281	C9H11O5S	Unknown	Unknown	plant biochar leachate	solid phase extraction, FT-ICR-MS	solid phase extraction, FT-ICR-MS	Lignin	Lignin	Other	Chen et al., 2022
282	C11H7N2O4	Unknown	Unknown	plant biochar leachate	solid phase extraction, FT-ICR-MS	solid phase extraction, FT-ICR-MS	Cond Hydrocarbon	Cond Hydrocarbon	Other	Chen et al., 2022; Yan et al., 2022
283	C9H11O7	Unknown	Unknown	plant biochar leachate	solid phase extraction, FT-ICR-MS	solid phase extraction, FT-ICR-MS	Tannin	Tannin	Other	Chen et al., 2022
284	C13H11O4	Unknown	Unknown	plant biochar leachate	solid phase extraction, FT-ICR-MS	solid phase extraction, FT-ICR-MS	Lignin	Lignin	Other	Chen et al., 2022; Yan et al., 2022
285	C10H15O6	Unknown	Unknown	plant biochar leachate	solid phase extraction, FT-ICR-MS	solid phase extraction, FT-ICR-MS	Amino Sugar	Amino Sugar	Other	Chen et al., 2022; Yan et al., 2022
286	C14H15O3	Unknown	Unknown	plant biochar leachate	solid phase extraction, FT-ICR-MS	solid phase extraction, FT-ICR-MS	Other	Lignin	Other	Chen et al., 2022; Yan et al., 2022
287	C11H19O5	Unknown	Unknown	plant biochar leachate	solid phase extraction, FT-ICR-MS	solid phase extraction, FT-ICR-MS	Protein	Protein	Other	Chen et al., 2022
288	C15H19O2	Unknown	Unknown	plant biochar leachate	solid phase extraction, FT-ICR-MS	solid phase extraction, FT-ICR-MS	Unsat Hydrocarbon	Lignin	Other	Chen et al., 2022
289	C14H19N2O	Unknown	Unknown	plant biochar leachate	solid phase extraction, FT-ICR-MS	solid phase extraction, FT-ICR-MS	Unsat Hydrocarbon	Unsat Hydrocarbon	Other	Chen et al., 2022
290	C13H27O3	Unknown	Unknown	plant biochar leachate	solid phase extraction, FT-ICR-MS	solid phase extraction, FT-ICR-MS	Lipid	Lipid	Other	Chen et al., 2022
291	C11H6NO5	Unknown	Unknown	plant biochar leachate	solid phase extraction, FT-ICR-MS	solid phase extraction, FT-ICR-MS	Cond Hydrocarbon	Cond Hydrocarbon	Other	Chen et al., 2022; Yan et al., 2022
292	C8H10NO7	Unknown	Unknown	plant biochar leachate	solid phase extraction, FT-ICR-MS	solid phase extraction, FT-ICR-MS	Tannin	Tannin	Other	Chen et al., 2022
293	C12H10NO4	Unknown	Unknown	plant biochar leachate	solid phase extraction, FT-ICR-MS	solid phase extraction, FT-ICR-MS	Lignin	Lignin	Other	Chen et al., 2022; Yan et al., 2022
294	C16H10NO	Unknown	Unknown	plant biochar leachate	solid phase extraction, FT-ICR-MS	solid phase extraction, FT-ICR-MS	Other	Cond Hydrocarbon	Other	Chen et al., 2022
295	C9H14NO6	Unknown	Unknown	plant biochar leachate	solid phase extraction, FT-ICR-MS	solid phase extraction, FT-ICR-MS	Amino Sugar	Amino Sugar	Other	Chen et al., 2022
296	C13H14NO3	Unknown	Unknown	plant biochar leachate	solid phase extraction, FT-ICR-MS	solid phase extraction, FT-ICR-MS	Other	Lignin	Other	Chen et al., 2022; Yan et al., 2022
297	C10H18NO5	Unknown	Unknown	plant biochar leachate	solid phase extraction, FT-ICR-MS	solid phase extraction, FT-ICR-MS	Protein	Protein	Other	Chen et al., 2022
298	C7H5O7S	Unknown	Unknown	plant biochar leachate	solid phase extraction, FT-ICR-MS	solid phase extraction, FT-ICR-MS	Tannin	Other	Other	Chen et al., 2022
299	C11H5O6	Unknown	Unknown	plant biochar leachate	solid phase extraction, FT-ICR-MS	solid phase extraction, FT-ICR-MS	Cond Hydrocarbon	Cond Hydrocarbon	Other	Chen et al., 2022; Yan et al., 2022
300	C8H9O6S	Unknown	Unknown	plant biochar leachate	solid phase extraction, FT-ICR-MS	solid phase extraction, FT-ICR-MS	Tannin	Tannin	Other	Chen et al., 2022
301	C10H5N2O5	Unknown	Unknown	plant biochar leachate	solid phase extraction, FT-ICR-MS	solid phase extraction, FT-ICR-MS	Cond Hydrocarbon	Cond Hydrocarbon	Other	Chen et al., 2022; Yan et al., 2022
302	C7H9N2O5S	Unknown	Unknown	plant biochar leachate	solid phase extraction, FT-ICR-MS	solid phase extraction, FT-ICR-MS	Tannin	Tannin	Protein	Chen et al., 2022
303	C15H5O3	Unknown	Unknown	plant biochar leachate	solid phase extraction, FT-ICR-MS	solid phase extraction, FT-ICR-MS	Cond Hydrocarbon	Cond Hydrocarbon	Other	Chen et al., 2022
304	C8H9O8	Unknown	Unknown	plant biochar leachate	solid phase extraction, FT-ICR-MS	solid phase extraction, FT-ICR-MS	Tannin	Tannin	Other	Chen et al., 2022
305	C12H9O5	Unknown	Unknown	plant biochar leachate	solid phase extraction, FT-ICR-MS	solid phase extraction, FT-ICR-MS	Cond Hydrocarbon	Cond Hydrocarbon	Other	Chen et al., 2022; Yan et al., 2022
306	C11H9N2O4	Unknown	Unknown	plant biochar leachate	solid phase extraction, FT-ICR-MS	solid phase extraction, FT-ICR-MS	Lignin	Lignin	Other	Chen et al., 2022; Yan et al., 2022
307	C9H13O7	Unknown	Unknown	plant biochar leachate	solid phase extraction, FT-ICR-MS	solid phase extraction, FT-ICR-MS	Other	Tannin	Other	Chen et al., 2022
308	C13H13O4	Unknown	Unknown	plant biochar leachate	solid phase extraction, FT-ICR-MS	solid phase extraction, FT-ICR-MS	Lignin	Lignin	Other	Chen et al., 2022; Yan et al., 2022
309	C12H13N2O3	Unknown	Unknown	plant biochar leachate	solid phase extraction, FT-ICR-MS	solid phase extraction, FT-ICR-MS	Other	Lignin	Protein	Chen et al., 2022
310	C17H13O	Unknown	Unknown	plant biochar leachate	solid phase extraction, FT-ICR-MS	solid phase extraction, FT-ICR-MS	Unsat Hydrocarbon	Cond Hydrocarbon	Other	Chen et al., 2022
311	C10H17O6	Unknown	Unknown	plant biochar leachate	solid phase extraction, FT-ICR-MS	solid phase extraction, FT-ICR-MS	Amino Sugar	Amino Sugar	Other	Chen et al., 2022
312	C14H17O3	Unknown	Unknown	plant biochar leachate	solid phase extraction, FT-ICR-MS	solid phase extraction, FT-ICR-MS	Other	Lignin	Other	Chen et al., 2022
313	C13H17N2O2	Unknown	Unknown	plant biochar leachate	solid phase extraction, FT-ICR-MS	solid phase extraction, FT-ICR-MS	Other	Lignin	Protein	Chen et al., 2022
314	C15H21O2	Unknown	Unknown	plant biochar leachate	solid phase extraction, FT-ICR-MS	solid phase extraction, FT-ICR-MS	Unsat Hydrocarbon	Lignin	Other	Chen et al., 2022; Yan et al., 2022
315	C10H4NO6	Unknown	Unknown	plant biochar leachate	solid phase extraction, FT-ICR-MS	solid phase extraction, FT-ICR-MS	Cond Hydrocarbon	Cond Hydrocarbon	Other	Chen et al., 2022; Yan et al., 2022
316	C13H4N3O2	Unknown	Unknown	plant biochar leachate	solid phase extraction, FT-ICR-MS	solid phase extraction, FT-ICR-MS	Cond Hydrocarbon	Cond Hydrocarbon	Other	Chen et al., 2022
317	C11H8NO5	Unknown	Unknown	plant biochar leachate	solid phase extraction, FT-ICR-MS	solid phase extraction, FT-ICR-MS	Cond Hydrocarbon	Cond Hydrocarbon	Other	Chen et al., 2022; Yan et al., 2022
318	C8H12NO7	Unknown	Unknown	plant biochar leachate	solid phase extraction, FT-ICR-MS	solid phase extraction, FT-ICR-MS	Carbohydrate	Carbohydrate	Other	Chen et al., 2022
319	C12H12NO4	Unknown	Unknown	plant biochar leachate	solid phase extraction, FT-ICR-MS	solid phase extraction, FT-ICR-MS	Lignin	Lignin	Other	Chen et al., 2022; Yan et al., 2022
320	C11H12N3O3	Unknown	Unknown	plant biochar leachate	solid phase extraction, FT-ICR-MS	solid phase extraction, FT-ICR-MS	Other	Lignin	Protein	Chen et al., 2022
321	C13H16NO3	Unknown	Unknown	plant biochar leachate	solid phase extraction, FT-ICR-MS	solid phase extraction, FT-ICR-MS	Other	Lignin	Other	Chen et al., 2022
322	C10H3O7	Unknown	Unknown	plant biochar leachate	solid phase extraction, FT-ICR-MS	solid phase extraction, FT-ICR-MS	Cond Hydrocarbon	Cond Hydrocarbon	Other	Chen et al., 2022
323	C7H7O7S	Unknown	Unknown	plant biochar leachate	solid phase extraction, FT-ICR-MS	solid phase extraction, FT-ICR-MS	Tannin	Tannin	Other	Chen et al., 2022
324	C11H7O4S	Unknown	Unknown	plant biochar leachate	solid phase extraction, FT-ICR-MS	solid phase extraction, FT-ICR-MS	Cond Hydrocarbon	Cond Hydrocarbon	Other	Chen et al., 2022
325	C11H7O6	Unknown	Unknown	plant biochar leachate	solid phase extraction, FT-ICR-MS	solid phase extraction, FT-ICR-MS	Cond Hydrocarbon	Cond Hydrocarbon	Other	Chen et al., 2022; Yan et al., 2022
326	C8H11O6S	Unknown	Unknown	plant biochar leachate	solid phase extraction, FT-ICR-MS	solid phase extraction, FT-ICR-MS	Other	Tannin	Other	Chen et al., 2022
327	C10H7N2O5	Unknown	Unknown	plant biochar leachate	solid phase extraction, FT-ICR-MS	solid phase extraction, FT-ICR-MS	Cond Hydrocarbon	Cond Hydrocarbon	Other	Chen et al., 2022; Yan et al., 2022
328	C7H11N2O5S	Unknown	Unknown	plant biochar leachate	solid phase extraction, FT-ICR-MS	solid phase extraction, FT-ICR-MS	Carbohydrate	Carbohydrate	Protein	Chen et al., 2022
329	C8H11O8	Unknown	Unknown	plant biochar leachate	solid phase extraction, FT-ICR-MS	solid phase extraction, FT-ICR-MS	Other	Tannin	Other	Chen et al., 2022
330	C12H11O5	Unknown	Unknown	plant biochar leachate	solid phase extraction, FT-ICR-MS	solid phase extraction, FT-ICR-MS	Lignin	Lignin	Other	Chen et al., 2022; Yan et al., 2022
331	C9H15O5S	Unknown	Unknown	plant biochar leachate	solid phase extraction, FT-ICR-MS	solid phase extraction, FT-ICR-MS	Amino Sugar	Amino Sugar	Other	Chen et al., 2022
332	C11H11N2O4	Unknown	Unknown	plant biochar leachate	solid phase extraction, FT-ICR-MS	solid phase extraction, FT-ICR-MS	Lignin	Lignin	Protein	Chen et al., 2022; Yan et al., 2022
333	C16H11O2	Unknown	Unknown	plant biochar leachate	solid phase extraction, FT-ICR-MS	solid phase extraction, FT-ICR-MS	Cond Hydrocarbon	Cond Hydrocarbon	Other	Chen et al., 2022; Yan et al., 2022
334	C9H15O7	Unknown	Unknown	plant biochar leachate	solid phase extraction, FT-ICR-MS	solid phase extraction, FT-ICR-MS	Carbohydrate	Carbohydrate	Other	Chen et al., 2022
335	C13H15O4	Unknown	Unknown	plant biochar leachate	solid phase extraction, FT-ICR-MS	solid phase extraction, FT-ICR-MS	Lignin	Lignin	Other	Chen et al., 2022; Yan et al., 2022
336	C12H15N2O3	Unknown	Unknown	plant biochar leachate	solid phase extraction, FT-ICR-MS	solid phase extraction, FT-ICR-MS	Other	Lignin	Protein	Chen et al., 2022
337	C14H19O3	Unknown	Unknown	plant biochar leachate	solid phase extraction, FT-ICR-MS	solid phase extraction, FT-ICR-MS	Other	Lignin	Other	Chen et al., 2022
338	C15H23O2	Unknown	Unknown	plant biochar leachate	solid phase extraction, FT-ICR-MS	solid phase extraction, FT-ICR-MS	Other	Lipid	Other	Chen et al., 2022; Goranov et al., 2020
339	C16H27O	Unknown	Unknown	plant biochar leachate	solid phase extraction, FT-ICR-MS	solid phase extraction, FT-ICR-MS	Lipid	Lipid;Unsat Hydrocarbon	Other	Chen et al., 2022
340	C10H6NO6	Unknown	Unknown	plant biochar leachate	solid phase extraction, FT-ICR-MS	solid phase extraction, FT-ICR-MS	Cond Hydrocarbon	Cond Hydrocarbon	Other	Chen et al., 2022; Yan et al., 2022
341	C11H10NO5	Unknown	Unknown	plant biochar leachate	solid phase extraction, FT-ICR-MS	solid phase extraction, FT-ICR-MS	Lignin	Lignin	Other	Chen et al., 2022; Yan et al., 2022
342	C8H14NO5S	Unknown	Unknown	plant biochar leachate	solid phase extraction, FT-ICR-MS	solid phase extraction, FT-ICR-MS	Amino Sugar	Amino Sugar	Other	Chen et al., 2022
343	C12H14NO4	Unknown	Unknown	plant biochar leachate	solid phase extraction, FT-ICR-MS	solid phase extraction, FT-ICR-MS	Lignin	Lignin	Other	Chen et al., 2022; Yan et al., 2022
344	C13H18NO3	Unknown	Unknown	plant biochar leachate	solid phase extraction, FT-ICR-MS	solid phase extraction, FT-ICR-MS	Other	Lignin	Other	Chen et al., 2022
345	C14H22NO2	Unknown	Unknown	plant biochar leachate	solid phase extraction, FT-ICR-MS	solid phase extraction, FT-ICR-MS	Lipid	Lipid	Other	Chen et al., 2022
346	C10H5O7	Unknown	Unknown	plant biochar leachate	solid phase extraction, FT-ICR-MS	solid phase extraction, FT-ICR-MS	Cond Hydrocarbon	Cond Hydrocarbon	Other	Chen et al., 2022; Yan et al., 2022
347	C7H9O7S	Unknown	Unknown	plant biochar leachate	solid phase extraction, FT-ICR-MS	solid phase extraction, FT-ICR-MS	Tannin	Tannin	Other	Chen et al., 2022
348	C14H5O4	Unknown	Unknown	plant biochar leachate	solid phase extraction, FT-ICR-MS	solid phase extraction, FT-ICR-MS	Cond Hydrocarbon	Cond Hydrocarbon	Other	Chen et al., 2022
349	C10H9N2O3S	Unknown	Unknown	plant biochar leachate	solid phase extraction, FT-ICR-MS	solid phase extraction, FT-ICR-MS	Lignin	Lignin	Other	Chen et al., 2022
350	C11H9O6	Unknown	Unknown	plant biochar leachate	solid phase extraction, FT-ICR-MS	solid phase extraction, FT-ICR-MS	Lignin	Lignin	Other	Chen et al., 2022; Yan et al., 2022
351	C8H13O6S	Unknown	Unknown	plant biochar leachate	solid phase extraction, FT-ICR-MS	solid phase extraction, FT-ICR-MS	Carbohydrate	Carbohydrate	Other	Chen et al., 2022
352	C10H9N2O5	Unknown	Unknown	plant biochar leachate	solid phase extraction, FT-ICR-MS	solid phase extraction, FT-ICR-MS	Lignin	Lignin	Other	Chen et al., 2022; Yan et al., 2022
353	C15H9O3	Unknown	Unknown	plant biochar leachate	solid phase extraction, FT-ICR-MS	solid phase extraction, FT-ICR-MS	Cond Hydrocarbon	Cond Hydrocarbon	Other	Chen et al., 2022; Yan et al., 2022
354	C12H13O5	Unknown	Unknown	plant biochar leachate	solid phase extraction, FT-ICR-MS	solid phase extraction, FT-ICR-MS	Lignin	Lignin	Other	Chen et al., 2022; Yan et al., 2022
355	C11H13N2O4	Unknown	Unknown	plant biochar leachate	solid phase extraction, FT-ICR-MS	solid phase extraction, FT-ICR-MS	Lignin	Lignin	Protein	Chen et al., 2022
356	C16H13O2	Unknown	Unknown	plant biochar leachate	solid phase extraction, FT-ICR-MS	solid phase extraction, FT-ICR-MS	Unsat Hydrocarbon	Unsat Hydrocarbon	Other	Chen et al., 2022; Yan et al., 2022
357	C13H17O4	Unknown	Unknown	plant biochar leachate	solid phase extraction, FT-ICR-MS	solid phase extraction, FT-ICR-MS	Lignin	Lignin	Other	Chen et al., 2022
358	C12H17N2O3	Unknown	Unknown	plant biochar leachate	solid phase extraction, FT-ICR-MS	solid phase extraction, FT-ICR-MS	Other	Lignin	Protein	Chen et al., 2022
359	C14H21O3	Unknown	Unknown	plant biochar leachate	solid phase extraction, FT-ICR-MS	solid phase extraction, FT-ICR-MS	Other	Lipid	Other	Chen et al., 2022; Yan et al., 2022
360	C9H4NO7	Unknown	Unknown	plant biochar leachate	solid phase extraction, FT-ICR-MS	solid phase extraction, FT-ICR-MS	Other	Cond Hydrocarbon	Other	Chen et al., 2022
361	C10H8NO6	Unknown	Unknown	plant biochar leachate	solid phase extraction, FT-ICR-MS	solid phase extraction, FT-ICR-MS	Cond Hydrocarbon	Lignin	Other	Chen et al., 2022; Yan et al., 2022
362	C14H8NO3	Unknown	Unknown	plant biochar leachate	solid phase extraction, FT-ICR-MS	solid phase extraction, FT-ICR-MS	Cond Hydrocarbon	Cond Hydrocarbon	Other	Chen et al., 2022; Yan et al., 2022
363	C11H12NO5	Unknown	Unknown	plant biochar leachate	solid phase extraction, FT-ICR-MS	solid phase extraction, FT-ICR-MS	Lignin	Lignin	Other	Chen et al., 2022; Yan et al., 2022
364	C15H12NO2	Unknown	Unknown	plant biochar leachate	solid phase extraction, FT-ICR-MS	solid phase extraction, FT-ICR-MS	Unsat Hydrocarbon;Cond Hydrocarbon	Lignin	Other	Chen et al., 2022
365	C14H12N3O	Unknown	Unknown	plant biochar leachate	solid phase extraction, FT-ICR-MS	solid phase extraction, FT-ICR-MS	Unsat Hydrocarbon	Unsat Hydrocarbon	Other	Chen et al., 2022
366	C12H16NO4	Unknown	Unknown	plant biochar leachate	solid phase extraction, FT-ICR-MS	solid phase extraction, FT-ICR-MS	Lignin	Lignin	Other	Chen et al., 2022
367	C8H3N2O7	Unknown	Unknown	plant biochar leachate	solid phase extraction, FT-ICR-MS	solid phase extraction, FT-ICR-MS	Other	Cond Hydrocarbon	Other	Chen et al., 2022
368	C10H7O7	Unknown	Unknown	plant biochar leachate	solid phase extraction, FT-ICR-MS	solid phase extraction, FT-ICR-MS	Tannin;Cond Hydrocarbon	Cond Hydrocarbon	Other	Chen et al., 2022; Yan et al., 2022
369	C7H11O7S	Unknown	Unknown	plant biochar leachate	solid phase extraction, FT-ICR-MS	solid phase extraction, FT-ICR-MS	Carbohydrate	Carbohydrate	Other	Chen et al., 2022
370	C9H7N2O6	Unknown	Unknown	plant biochar leachate	solid phase extraction, FT-ICR-MS	solid phase extraction, FT-ICR-MS	Tannin;Cond Hydrocarbon	Cond Hydrocarbon	Other	Chen et al., 2022
371	C14H7O4	Unknown	Unknown	plant biochar leachate	solid phase extraction, FT-ICR-MS	solid phase extraction, FT-ICR-MS	Cond Hydrocarbon	Cond Hydrocarbon	Other	Chen et al., 2022; Yan et al., 2022
372	C11H11O4S	Unknown	Unknown	plant biochar leachate	solid phase extraction, FT-ICR-MS	solid phase extraction, FT-ICR-MS	Lignin	Lignin	Other	Chen et al., 2022
373	C11H11O6	Unknown	Unknown	plant biochar leachate	solid phase extraction, FT-ICR-MS	solid phase extraction, FT-ICR-MS	Lignin	Lignin	Other	Chen et al., 2022; Yan et al., 2022
374	C8H15O6S	Unknown	Unknown	plant biochar leachate	solid phase extraction, FT-ICR-MS	solid phase extraction, FT-ICR-MS	Carbohydrate	Carbohydrate	Other	Chen et al., 2022
375	C10H11N2O5	Unknown	Unknown	plant biochar leachate	solid phase extraction, FT-ICR-MS	solid phase extraction, FT-ICR-MS	Lignin	Lignin	Protein	Chen et al., 2022; Yan et al., 2022
376	C15H11O3	Unknown	Unknown	plant biochar leachate	solid phase extraction, FT-ICR-MS	solid phase extraction, FT-ICR-MS	Cond Hydrocarbon	Cond Hydrocarbon	Other	Chen et al., 2022; Yan et al., 2022
377	C14H11N2O2	Unknown	Unknown	plant biochar leachate	solid phase extraction, FT-ICR-MS	solid phase extraction, FT-ICR-MS	Unsat Hydrocarbon;Cond Hydrocarbon	Cond Hydrocarbon	Other	Chen et al., 2022
378	C12H15O5	Unknown	Unknown	plant biochar leachate	solid phase extraction, FT-ICR-MS	solid phase extraction, FT-ICR-MS	Lignin	Lignin	Other	Chen et al., 2022; Yan et al., 2022
379	C11H15N2O4	Unknown	Unknown	plant biochar leachate	solid phase extraction, FT-ICR-MS	solid phase extraction, FT-ICR-MS	Lignin	Lignin	Protein	Chen et al., 2022
380	C16H15O2	Unknown	Unknown	plant biochar leachate	solid phase extraction, FT-ICR-MS	solid phase extraction, FT-ICR-MS	Unsat Hydrocarbon	Unsat Hydrocarbon	Other	Chen et al., 2022; Yan et al., 2022
381	C15H15N2O	Unknown	Unknown	plant biochar leachate	solid phase extraction, FT-ICR-MS	solid phase extraction, FT-ICR-MS	Unsat Hydrocarbon	Unsat Hydrocarbon	Other	Chen et al., 2022
382	C13H19O4	Unknown	Unknown	plant biochar leachate	solid phase extraction, FT-ICR-MS	solid phase extraction, FT-ICR-MS	Protein	Lignin	Other	Chen et al., 2022; Yan et al., 2022
383	C12H19N2O3	Unknown	Unknown	plant biochar leachate	solid phase extraction, FT-ICR-MS	solid phase extraction, FT-ICR-MS	Lipid	Lipid	Protein	Chen et al., 2022
384	C9H6NO5S	Unknown	Unknown	plant biochar leachate	solid phase extraction, FT-ICR-MS	solid phase extraction, FT-ICR-MS	Cond Hydrocarbon	Cond Hydrocarbon	Other	Chen et al., 2022
385	C9H6NO7	Unknown	Unknown	plant biochar leachate	solid phase extraction, FT-ICR-MS	solid phase extraction, FT-ICR-MS	Other	Cond Hydrocarbon	Other	Chen et al., 2022
386	C13H6NO4	Unknown	Unknown	plant biochar leachate	solid phase extraction, FT-ICR-MS	solid phase extraction, FT-ICR-MS	Cond Hydrocarbon	Cond Hydrocarbon	Other	Chen et al., 2022; Yan et al., 2022
387	C10H10NO6	Unknown	Unknown	plant biochar leachate	solid phase extraction, FT-ICR-MS	solid phase extraction, FT-ICR-MS	Lignin	Lignin	Other	Chen et al., 2022; Yan et al., 2022
388	C14H10NO3	Unknown	Unknown	plant biochar leachate	solid phase extraction, FT-ICR-MS	solid phase extraction, FT-ICR-MS	Cond Hydrocarbon	Cond Hydrocarbon	Other	Chen et al., 2022; Yan et al., 2022
389	C11H14NO5	Unknown	Unknown	plant biochar leachate	solid phase extraction, FT-ICR-MS	solid phase extraction, FT-ICR-MS	Lignin	Lignin	Other	Chen et al., 2022
390	C12H18NO4	Unknown	Unknown	plant biochar leachate	solid phase extraction, FT-ICR-MS	solid phase extraction, FT-ICR-MS	Protein	Protein	Other	Chen et al., 2022
391	C12H22N3O2	Unknown	Unknown	plant biochar leachate	solid phase extraction, FT-ICR-MS	solid phase extraction, FT-ICR-MS	Lipid	Lipid	Protein	Chen et al., 2022
392	C14H26NO2	Unknown	Unknown	plant biochar leachate	solid phase extraction, FT-ICR-MS	solid phase extraction, FT-ICR-MS	Lipid	Lipid	Other	Chen et al., 2022
393	C9H5O6S	Unknown	Unknown	plant biochar leachate	solid phase extraction, FT-ICR-MS	solid phase extraction, FT-ICR-MS	Cond Hydrocarbon	Cond Hydrocarbon	Other	Chen et al., 2022
394	C8H5N2O5S	Unknown	Unknown	plant biochar leachate	solid phase extraction, FT-ICR-MS	solid phase extraction, FT-ICR-MS	Cond Hydrocarbon	Cond Hydrocarbon	Other	Chen et al., 2022
395	C9H5O8	Unknown	Unknown	plant biochar leachate	solid phase extraction, FT-ICR-MS	solid phase extraction, FT-ICR-MS	Other	Cond Hydrocarbon	Other	Chen et al., 2022; Yan et al., 2022
396	C8H5N2O7	Unknown	Unknown	plant biochar leachate	solid phase extraction, FT-ICR-MS	solid phase extraction, FT-ICR-MS	Other	Cond Hydrocarbon	Other	Chen et al., 2022
397	C13H5O5	Unknown	Unknown	plant biochar leachate	solid phase extraction, FT-ICR-MS	solid phase extraction, FT-ICR-MS	Cond Hydrocarbon	Cond Hydrocarbon	Other	Chen et al., 2022; Yan et al., 2022
398	C10H9O5S	Unknown	Unknown	plant biochar leachate	solid phase extraction, FT-ICR-MS	solid phase extraction, FT-ICR-MS	Lignin	Lignin	Other	Chen et al., 2022
399	C12H5N2O4	Unknown	Unknown	plant biochar leachate	solid phase extraction, FT-ICR-MS	solid phase extraction, FT-ICR-MS	Cond Hydrocarbon	Cond Hydrocarbon	Other	Chen et al., 2022
400	C10H9O7	Unknown	Unknown	plant biochar leachate	solid phase extraction, FT-ICR-MS	solid phase extraction, FT-ICR-MS	Tannin	Tannin	Other	Chen et al., 2022; Yan et al., 2022
401	C9H9N2O6	Unknown	Unknown	plant biochar leachate	solid phase extraction, FT-ICR-MS	solid phase extraction, FT-ICR-MS	Tannin	Tannin	Other	Chen et al., 2022
402	C14H9O4	Unknown	Unknown	plant biochar leachate	solid phase extraction, FT-ICR-MS	solid phase extraction, FT-ICR-MS	Cond Hydrocarbon	Cond Hydrocarbon	Other	Chen et al., 2022; Yan et al., 2022
403	C11H13O4S	Unknown	Unknown	plant biochar leachate	solid phase extraction, FT-ICR-MS	solid phase extraction, FT-ICR-MS	Lignin	Lignin	Other	Chen et al., 2022
404	C13H9N2O3	Unknown	Unknown	plant biochar leachate	solid phase extraction, FT-ICR-MS	solid phase extraction, FT-ICR-MS	Cond Hydrocarbon	Cond Hydrocarbon	Other	Chen et al., 2022
405	C11H13O6	Unknown	Unknown	plant biochar leachate	solid phase extraction, FT-ICR-MS	solid phase extraction, FT-ICR-MS	Lignin	Lignin	Other	Chen et al., 2022; Yan et al., 2022
406	C10H13N2O5	Unknown	Unknown	plant biochar leachate	solid phase extraction, FT-ICR-MS	solid phase extraction, FT-ICR-MS	Lignin	Lignin	Protein	Chen et al., 2022
407	C15H13O3	Unknown	Unknown	plant biochar leachate	solid phase extraction, FT-ICR-MS	solid phase extraction, FT-ICR-MS	Other	Lignin	Other	Chen et al., 2022; Yan et al., 2022
408	C12H17O5	Unknown	Unknown	plant biochar leachate	solid phase extraction, FT-ICR-MS	solid phase extraction, FT-ICR-MS	Lignin	Lignin	Other	Chen et al., 2022; Yan et al., 2022
409	C11H17N2O4	Unknown	Unknown	plant biochar leachate	solid phase extraction, FT-ICR-MS	solid phase extraction, FT-ICR-MS	Protein	Protein	Protein	Chen et al., 2022
410	C16H17O2	Unknown	Unknown	plant biochar leachate	solid phase extraction, FT-ICR-MS	solid phase extraction, FT-ICR-MS	Unsat Hydrocarbon	Unsat Hydrocarbon	Other	Chen et al., 2022; Yan et al., 2022
411	C13H21O4	Unknown	Unknown	plant biochar leachate	solid phase extraction, FT-ICR-MS	solid phase extraction, FT-ICR-MS	Protein	Protein	Other	Chen et al., 2022
412	C8H4NO8	Unknown	Unknown	plant biochar leachate	solid phase extraction, FT-ICR-MS	solid phase extraction, FT-ICR-MS	Other	Other	Other	Chen et al., 2022
413	C12H4NO5	Unknown	Unknown	plant biochar leachate	solid phase extraction, FT-ICR-MS	solid phase extraction, FT-ICR-MS	Cond Hydrocarbon	Cond Hydrocarbon	Other	Chen et al., 2022; Yan et al., 2022
414	C9H8NO7	Unknown	Unknown	plant biochar leachate	solid phase extraction, FT-ICR-MS	solid phase extraction, FT-ICR-MS	Tannin	Tannin	Other	Chen et al., 2022
415	C13H8NO4	Unknown	Unknown	plant biochar leachate	solid phase extraction, FT-ICR-MS	solid phase extraction, FT-ICR-MS	Cond Hydrocarbon	Cond Hydrocarbon	Other	Chen et al., 2022; Yan et al., 2022
416	C10H12NO6	Unknown	Unknown	plant biochar leachate	solid phase extraction, FT-ICR-MS	solid phase extraction, FT-ICR-MS	Lignin	Lignin	Other	Chen et al., 2022; Yan et al., 2022
417	C14H12NO3	Unknown	Unknown	plant biochar leachate	solid phase extraction, FT-ICR-MS	solid phase extraction, FT-ICR-MS	Other	Lignin	Other	Chen et al., 2022; Yan et al., 2022
418	C11H16NO5	Unknown	Unknown	plant biochar leachate	solid phase extraction, FT-ICR-MS	solid phase extraction, FT-ICR-MS	Protein	Lignin	Other	Chen et al., 2022; Yan et al., 2022
419	C12H20NO4	Unknown	Unknown	plant biochar leachate	solid phase extraction, FT-ICR-MS	solid phase extraction, FT-ICR-MS	Protein	Protein	Other	Chen et al., 2022
420	C13H24NO3	Unknown	Unknown	plant biochar leachate	solid phase extraction, FT-ICR-MS	solid phase extraction, FT-ICR-MS	Lipid	Lipid	Other	Chen et al., 2022; Yan et al., 2022
421	C8H3O7S	Unknown	Unknown	plant biochar leachate	solid phase extraction, FT-ICR-MS	solid phase extraction, FT-ICR-MS	Other	Cond Hydrocarbon	Other	Chen et al., 2022
422	C8H3O9	Unknown	Unknown	plant biochar leachate	solid phase extraction, FT-ICR-MS	solid phase extraction, FT-ICR-MS	Other	Other	Other	Chen et al., 2022; Yan et al., 2022
423	C12H3O6	Unknown	Unknown	plant biochar leachate	solid phase extraction, FT-ICR-MS	solid phase extraction, FT-ICR-MS	Other	Cond Hydrocarbon	Other	Chen et al., 2022
424	C9H7O6S	Unknown	Unknown	plant biochar leachate	solid phase extraction, FT-ICR-MS	solid phase extraction, FT-ICR-MS	Tannin;Cond Hydrocarbon	Cond Hydrocarbon	Other	Chen et al., 2022
425	C9H7O8	Unknown	Unknown	plant biochar leachate	solid phase extraction, FT-ICR-MS	solid phase extraction, FT-ICR-MS	Tannin	Cond Hydrocarbon	Other	Chen et al., 2022
426	C13H7O5	Unknown	Unknown	plant biochar leachate	solid phase extraction, FT-ICR-MS	solid phase extraction, FT-ICR-MS	Cond Hydrocarbon	Cond Hydrocarbon	Other	Chen et al., 2022; Yan et al., 2022
427	C10H11O5S	Unknown	Unknown	plant biochar leachate	solid phase extraction, FT-ICR-MS	solid phase extraction, FT-ICR-MS	Lignin	Lignin	Other	Chen et al., 2022
428	C10H11O7	Unknown	Unknown	plant biochar leachate	solid phase extraction, FT-ICR-MS	solid phase extraction, FT-ICR-MS	Tannin	Tannin	Other	Chen et al., 2022; Yan et al., 2022
429	C9H11N2O6	Unknown	Unknown	plant biochar leachate	solid phase extraction, FT-ICR-MS	solid phase extraction, FT-ICR-MS	Tannin	Tannin	Protein	Chen et al., 2022
430	C14H11O4	Unknown	Unknown	plant biochar leachate	solid phase extraction, FT-ICR-MS	solid phase extraction, FT-ICR-MS	Cond Hydrocarbon	Cond Hydrocarbon	Other	Chen et al., 2022; Yan et al., 2022
431	C13H11N2O3	Unknown	Unknown	plant biochar leachate	solid phase extraction, FT-ICR-MS	solid phase extraction, FT-ICR-MS	Other	Lignin	Other	Chen et al., 2022
432	C11H15O6	Unknown	Unknown	plant biochar leachate	solid phase extraction, FT-ICR-MS	solid phase extraction, FT-ICR-MS	Lignin;Amino Sugar	Lignin	Other	Chen et al., 2022; Yan et al., 2022
433	C10H15N2O5	Unknown	Unknown	plant biochar leachate	solid phase extraction, FT-ICR-MS	solid phase extraction, FT-ICR-MS	Protein	Protein	Protein	Chen et al., 2022
434	C15H15O3	Unknown	Unknown	plant biochar leachate	solid phase extraction, FT-ICR-MS	solid phase extraction, FT-ICR-MS	Other	Lignin	Other	Chen et al., 2022; Yan et al., 2022
435	C12H19O5	Unknown	Unknown	plant biochar leachate	solid phase extraction, FT-ICR-MS	solid phase extraction, FT-ICR-MS	Protein	Protein	Other	Chen et al., 2022
436	C11H19N2O4	Unknown	Unknown	plant biochar leachate	solid phase extraction, FT-ICR-MS	solid phase extraction, FT-ICR-MS	Protein	Protein	Protein	Chen et al., 2022
437	C16H19O2	Unknown	Unknown	plant biochar leachate	solid phase extraction, FT-ICR-MS	solid phase extraction, FT-ICR-MS	Unsat Hydrocarbon	Unsat Hydrocarbon	Other	Chen et al., 2022; Yan et al., 2022
438	C13H23O4	Unknown	Unknown	plant biochar leachate	solid phase extraction, FT-ICR-MS	solid phase extraction, FT-ICR-MS	Protein	Protein	Other	Chen et al., 2022; Yan et al., 2022
439	C15H31O2	Unknown	Unknown	plant biochar leachate	solid phase extraction, FT-ICR-MS	solid phase extraction, FT-ICR-MS	Lipid	Lipid	Other	Chen et al., 2022
440	C12H6NO5	Unknown	Unknown	plant biochar leachate	solid phase extraction, FT-ICR-MS	solid phase extraction, FT-ICR-MS	Cond Hydrocarbon	Cond Hydrocarbon	Other	Chen et al., 2022; Yan et al., 2022
441	C8H10N3O4S	Unknown	Unknown	plant biochar leachate	solid phase extraction, FT-ICR-MS	solid phase extraction, FT-ICR-MS	Lignin	Lignin	Protein	Chen et al., 2022
442	C16H6NO2	Unknown	Unknown	plant biochar leachate	solid phase extraction, FT-ICR-MS	solid phase extraction, FT-ICR-MS	Cond Hydrocarbon	Cond Hydrocarbon	Other	Chen et al., 2022
443	C9H10NO7	Unknown	Unknown	plant biochar leachate	solid phase extraction, FT-ICR-MS	solid phase extraction, FT-ICR-MS	Tannin	Tannin	Other	Chen et al., 2022
444	C15H6N3O	Unknown	Unknown	plant biochar leachate	solid phase extraction, FT-ICR-MS	solid phase extraction, FT-ICR-MS	Other	Cond Hydrocarbon	Other	Chen et al., 2022
445	C13H10NO4	Unknown	Unknown	plant biochar leachate	solid phase extraction, FT-ICR-MS	solid phase extraction, FT-ICR-MS	Cond Hydrocarbon	Cond Hydrocarbon	Other	Chen et al., 2022; Yan et al., 2022
446	C10H14NO6	Unknown	Unknown	plant biochar leachate	solid phase extraction, FT-ICR-MS	solid phase extraction, FT-ICR-MS	Lignin;Amino Sugar	Lignin	Other	Chen et al., 2022; Yan et al., 2022
447	C14H14NO3	Unknown	Unknown	plant biochar leachate	solid phase extraction, FT-ICR-MS	solid phase extraction, FT-ICR-MS	Other	Lignin	Other	Chen et al., 2022; Yan et al., 2022
448	C11H18NO5	Unknown	Unknown	plant biochar leachate	solid phase extraction, FT-ICR-MS	solid phase extraction, FT-ICR-MS	Protein	Protein	Other	Chen et al., 2022
449	C11H22N3OS	Unknown	Unknown	plant biochar leachate	solid phase extraction, FT-ICR-MS	solid phase extraction, FT-ICR-MS	Lipid	Lipid;Unsat Hydrocarbon	Other	Chen et al., 2022
450	C12H22NO4	Unknown	Unknown	plant biochar leachate	solid phase extraction, FT-ICR-MS	solid phase extraction, FT-ICR-MS	Protein	Protein	Other	Chen et al., 2022
451	C8H5O7S	Unknown	Unknown	plant biochar leachate	solid phase extraction, FT-ICR-MS	solid phase extraction, FT-ICR-MS	Other	Cond Hydrocarbon	Other	Chen et al., 2022
452	C8H5O9	Unknown	Unknown	plant biochar leachate	solid phase extraction, FT-ICR-MS	solid phase extraction, FT-ICR-MS	Other	Other	Other	Chen et al., 2022; Yan et al., 2022
453	C12H5O6	Unknown	Unknown	plant biochar leachate	solid phase extraction, FT-ICR-MS	solid phase extraction, FT-ICR-MS	Cond Hydrocarbon	Cond Hydrocarbon	Other	Chen et al., 2022; Yan et al., 2022
454	C9H9O6S	Unknown	Unknown	plant biochar leachate	solid phase extraction, FT-ICR-MS	solid phase extraction, FT-ICR-MS	Tannin	Tannin	Other	Chen et al., 2022
455	C11H5N2O5	Unknown	Unknown	plant biochar leachate	solid phase extraction, FT-ICR-MS	solid phase extraction, FT-ICR-MS	Cond Hydrocarbon	Cond Hydrocarbon	Other	Chen et al., 2022
456	C9H9O8	Unknown	Unknown	plant biochar leachate	solid phase extraction, FT-ICR-MS	solid phase extraction, FT-ICR-MS	Tannin	Tannin	Other	Chen et al., 2022
457	C13H9O5	Unknown	Unknown	plant biochar leachate	solid phase extraction, FT-ICR-MS	solid phase extraction, FT-ICR-MS	Cond Hydrocarbon	Cond Hydrocarbon	Other	Chen et al., 2022; Yan et al., 2022
458	C12H9N2O4	Unknown	Unknown	plant biochar leachate	solid phase extraction, FT-ICR-MS	solid phase extraction, FT-ICR-MS	Cond Hydrocarbon	Cond Hydrocarbon	Other	Chen et al., 2022; Yan et al., 2022
459	C10H13O7	Unknown	Unknown	plant biochar leachate	solid phase extraction, FT-ICR-MS	solid phase extraction, FT-ICR-MS	Tannin	Tannin	Other	Chen et al., 2022
460	C9H13N2O6	Unknown	Unknown	plant biochar leachate	solid phase extraction, FT-ICR-MS	solid phase extraction, FT-ICR-MS	Amino Sugar	Tannin	Protein	Chen et al., 2022
461	C14H13O4	Unknown	Unknown	plant biochar leachate	solid phase extraction, FT-ICR-MS	solid phase extraction, FT-ICR-MS	Lignin	Lignin	Other	Chen et al., 2022; Yan et al., 2022
462	C13H13N2O3	Unknown	Unknown	plant biochar leachate	solid phase extraction, FT-ICR-MS	solid phase extraction, FT-ICR-MS	Other	Lignin	Protein	Chen et al., 2022
463	C11H17O6	Unknown	Unknown	plant biochar leachate	solid phase extraction, FT-ICR-MS	solid phase extraction, FT-ICR-MS	Protein;Amino Sugar	Protein	Other	Chen et al., 2022; Yan et al., 2022
464	C15H17O3	Unknown	Unknown	plant biochar leachate	solid phase extraction, FT-ICR-MS	solid phase extraction, FT-ICR-MS	Other	Lignin	Other	Chen et al., 2022
465	C12H21O5	Unknown	Unknown	plant biochar leachate	solid phase extraction, FT-ICR-MS	solid phase extraction, FT-ICR-MS	Protein	Protein	Other	Chen et al., 2022
466	C13H25O4	Unknown	Unknown	plant biochar leachate	solid phase extraction, FT-ICR-MS	solid phase extraction, FT-ICR-MS	Protein	Protein	Other	Chen et al., 2022
467	C14H29O3	Unknown	Unknown	plant biochar leachate	solid phase extraction, FT-ICR-MS	solid phase extraction, FT-ICR-MS	Lipid	Lipid	Other	Chen et al., 2022
468	C11H4NO6	Unknown	Unknown	plant biochar leachate	solid phase extraction, FT-ICR-MS	solid phase extraction, FT-ICR-MS	Cond Hydrocarbon	Cond Hydrocarbon	Other	Chen et al., 2022
469	C12H8NO5	Unknown	Unknown	plant biochar leachate	solid phase extraction, FT-ICR-MS	solid phase extraction, FT-ICR-MS	Cond Hydrocarbon	Cond Hydrocarbon	Other	Chen et al., 2022; Yan et al., 2022
470	C9H12NO7	Unknown	Unknown	plant biochar leachate	solid phase extraction, FT-ICR-MS	solid phase extraction, FT-ICR-MS	Other	Tannin	Other	Chen et al., 2022
471	C12H12N3OS	Unknown	Unknown	plant biochar leachate	solid phase extraction, FT-ICR-MS	solid phase extraction, FT-ICR-MS	Unsat Hydrocarbon	Unsat Hydrocarbon	Other	Chen et al., 2022
472	C13H12NO4	Unknown	Unknown	plant biochar leachate	solid phase extraction, FT-ICR-MS	solid phase extraction, FT-ICR-MS	Lignin	Lignin	Other	Chen et al., 2022; Yan et al., 2022
473	C10H16NO6	Unknown	Unknown	plant biochar leachate	solid phase extraction, FT-ICR-MS	solid phase extraction, FT-ICR-MS	Amino Sugar	Amino Sugar	Other	Chen et al., 2022
474	C14H16NO3	Unknown	Unknown	plant biochar leachate	solid phase extraction, FT-ICR-MS	solid phase extraction, FT-ICR-MS	Other	Lignin	Other	Chen et al., 2022
475	C11H20NO5	Unknown	Unknown	plant biochar leachate	solid phase extraction, FT-ICR-MS	solid phase extraction, FT-ICR-MS	Protein	Protein	Other	Chen et al., 2022
476	C10H3N2O4S	Unknown	Unknown	plant biochar leachate	solid phase extraction, FT-ICR-MS	solid phase extraction, FT-ICR-MS	Cond Hydrocarbon	Cond Hydrocarbon	Other	Chen et al., 2022
477	C11H3O7	Unknown	Unknown	plant biochar leachate	solid phase extraction, FT-ICR-MS	solid phase extraction, FT-ICR-MS	Other	Cond Hydrocarbon	Other	Chen et al., 2022
478	C8H7O7S	Unknown	Unknown	plant biochar leachate	solid phase extraction, FT-ICR-MS	solid phase extraction, FT-ICR-MS	Tannin	Tannin	Other	Chen et al., 2022
479	C12H7O4S	Unknown	Unknown	plant biochar leachate	solid phase extraction, FT-ICR-MS	solid phase extraction, FT-ICR-MS	Cond Hydrocarbon	Cond Hydrocarbon	Other	Chen et al., 2022
480	C12H7O6	Unknown	Unknown	plant biochar leachate	solid phase extraction, FT-ICR-MS	solid phase extraction, FT-ICR-MS	Cond Hydrocarbon	Cond Hydrocarbon	Other	Chen et al., 2022; Yan et al., 2022
481	C9H11O6S	Unknown	Unknown	plant biochar leachate	solid phase extraction, FT-ICR-MS	solid phase extraction, FT-ICR-MS	Tannin	Tannin	Other	Chen et al., 2022
482	C11H7N2O5	Unknown	Unknown	plant biochar leachate	solid phase extraction, FT-ICR-MS	solid phase extraction, FT-ICR-MS	Cond Hydrocarbon	Cond Hydrocarbon	Other	Chen et al., 2022; Yan et al., 2022
483	C9H11O8	Unknown	Unknown	plant biochar leachate	solid phase extraction, FT-ICR-MS	solid phase extraction, FT-ICR-MS	Tannin	Tannin	Other	Chen et al., 2022
484	C13H11O5	Unknown	Unknown	plant biochar leachate	solid phase extraction, FT-ICR-MS	solid phase extraction, FT-ICR-MS	Lignin	Lignin	Other	Chen et al., 2022; Yan et al., 2022
485	C12H11N2O4	Unknown	Unknown	plant biochar leachate	solid phase extraction, FT-ICR-MS	solid phase extraction, FT-ICR-MS	Lignin	Lignin	Protein	Chen et al., 2022; Yan et al., 2022
486	C17H11O2	Unknown	Unknown	plant biochar leachate	solid phase extraction, FT-ICR-MS	solid phase extraction, FT-ICR-MS	Other	Cond Hydrocarbon	Other	Chen et al., 2022; Yan et al., 2022
487	C10H15O7	Unknown	Unknown	plant biochar leachate	solid phase extraction, FT-ICR-MS	solid phase extraction, FT-ICR-MS	Carbohydrate;Amino Sugar	Amino Sugar	Other	Chen et al., 2022
488	C14H15O4	Unknown	Unknown	plant biochar leachate	solid phase extraction, FT-ICR-MS	solid phase extraction, FT-ICR-MS	Lignin	Lignin	Other	Chen et al., 2022; Yan et al., 2022
489	C13H15N2O3	Unknown	Unknown	plant biochar leachate	solid phase extraction, FT-ICR-MS	solid phase extraction, FT-ICR-MS	Other	Lignin	Protein	Chen et al., 2022
490	C11H19O6	Unknown	Unknown	plant biochar leachate	solid phase extraction, FT-ICR-MS	solid phase extraction, FT-ICR-MS	Protein;Amino Sugar	Protein	Other	Chen et al., 2022
491	C15H19O3	Unknown	Unknown	plant biochar leachate	solid phase extraction, FT-ICR-MS	solid phase extraction, FT-ICR-MS	Other	Lignin	Other	Chen et al., 2022
492	C11H6NO6	Unknown	Unknown	plant biochar leachate	solid phase extraction, FT-ICR-MS	solid phase extraction, FT-ICR-MS	Cond Hydrocarbon	Cond Hydrocarbon	Other	Chen et al., 2022; Yan et al., 2022
493	C8H10NO8	Unknown	Unknown	plant biochar leachate	solid phase extraction, FT-ICR-MS	solid phase extraction, FT-ICR-MS	Tannin	Tannin	Other	Chen et al., 2022
494	C12H10NO5	Unknown	Unknown	plant biochar leachate	solid phase extraction, FT-ICR-MS	solid phase extraction, FT-ICR-MS	Lignin	Lignin	Other	Chen et al., 2022; Yan et al., 2022
495	C9H14NO7	Unknown	Unknown	plant biochar leachate	solid phase extraction, FT-ICR-MS	solid phase extraction, FT-ICR-MS	Carbohydrate	Carbohydrate	Other	Chen et al., 2022
496	C13H14NO4	Unknown	Unknown	plant biochar leachate	solid phase extraction, FT-ICR-MS	solid phase extraction, FT-ICR-MS	Lignin	Lignin	Other	Chen et al., 2022; Yan et al., 2022
497	C10H18NO6	Unknown	Unknown	plant biochar leachate	solid phase extraction, FT-ICR-MS	solid phase extraction, FT-ICR-MS	Amino Sugar	Amino Sugar	Other	Chen et al., 2022
498	C14H18NO3	Unknown	Unknown	plant biochar leachate	solid phase extraction, FT-ICR-MS	solid phase extraction, FT-ICR-MS	Other	Lignin	Other	Chen et al., 2022
499	C16H26NO	Unknown	Unknown	plant biochar leachate	solid phase extraction, FT-ICR-MS	solid phase extraction, FT-ICR-MS	Lipid	Lipid;Unsat Hydrocarbon	Other	Chen et al., 2022
500	C11H5O7	Unknown	Unknown	plant biochar leachate	solid phase extraction, FT-ICR-MS	solid phase extraction, FT-ICR-MS	Cond Hydrocarbon	Cond Hydrocarbon	Other	Chen et al., 2022; Yan et al., 2022
501	C8H9O7S	Unknown	Unknown	plant biochar leachate	solid phase extraction, FT-ICR-MS	solid phase extraction, FT-ICR-MS	Tannin	Tannin	Other	Chen et al., 2022
502	C10H5N2O6	Unknown	Unknown	plant biochar leachate	solid phase extraction, FT-ICR-MS	solid phase extraction, FT-ICR-MS	Cond Hydrocarbon	Cond Hydrocarbon	Other	Chen et al., 2022; Yan et al., 2022
503	C15H5O4	Unknown	Unknown	plant biochar leachate	solid phase extraction, FT-ICR-MS	solid phase extraction, FT-ICR-MS	Cond Hydrocarbon	Cond Hydrocarbon	Other	Chen et al., 2022
504	C8H9O9	Unknown	Unknown	plant biochar leachate	solid phase extraction, FT-ICR-MS	solid phase extraction, FT-ICR-MS	Other	Other	Other	Chen et al., 2022
505	C12H9O6	Unknown	Unknown	plant biochar leachate	solid phase extraction, FT-ICR-MS	solid phase extraction, FT-ICR-MS	Cond Hydrocarbon	Cond Hydrocarbon	Other	Chen et al., 2022; Yan et al., 2022
506	C11H9N2O5	Unknown	Unknown	plant biochar leachate	solid phase extraction, FT-ICR-MS	solid phase extraction, FT-ICR-MS	Lignin	Lignin	Other	Chen et al., 2022; Yan et al., 2022
507	C16H9O3	Unknown	Unknown	plant biochar leachate	solid phase extraction, FT-ICR-MS	solid phase extraction, FT-ICR-MS	Cond Hydrocarbon	Cond Hydrocarbon	Other	Chen et al., 2022; Yan et al., 2022
508	C9H13O8	Unknown	Unknown	plant biochar leachate	solid phase extraction, FT-ICR-MS	solid phase extraction, FT-ICR-MS	Other	Tannin	Other	Chen et al., 2022
509	C13H13O5	Unknown	Unknown	plant biochar leachate	solid phase extraction, FT-ICR-MS	solid phase extraction, FT-ICR-MS	Lignin	Lignin	Other	Chen et al., 2022; Yan et al., 2022
510	C12H13N2O4	Unknown	Unknown	plant biochar leachate	solid phase extraction, FT-ICR-MS	solid phase extraction, FT-ICR-MS	Lignin	Lignin	Protein	Chen et al., 2022; Yan et al., 2022
511	C10H17O7	Unknown	Unknown	plant biochar leachate	solid phase extraction, FT-ICR-MS	solid phase extraction, FT-ICR-MS	Carbohydrate;Amino Sugar	Amino Sugar	Other	Chen et al., 2022
512	C14H17O4	Unknown	Unknown	plant biochar leachate	solid phase extraction, FT-ICR-MS	solid phase extraction, FT-ICR-MS	Lignin	Lignin	Other	Chen et al., 2022; Yan et al., 2022
513	C13H17N2O3	Unknown	Unknown	plant biochar leachate	solid phase extraction, FT-ICR-MS	solid phase extraction, FT-ICR-MS	Other	Lignin	Protein	Chen et al., 2022
514	C15H21OS	Unknown	Unknown	plant biochar leachate	solid phase extraction, FT-ICR-MS	solid phase extraction, FT-ICR-MS	Unsat Hydrocarbon	Unsat Hydrocarbon	Other	Chen et al., 2022
515	C15H21O3	Unknown	Unknown	plant biochar leachate	solid phase extraction, FT-ICR-MS	solid phase extraction, FT-ICR-MS	Other	Lignin	Other	Chen et al., 2022
516	C14H21N2O2	Unknown	Unknown	plant biochar leachate	solid phase extraction, FT-ICR-MS	solid phase extraction, FT-ICR-MS	Unsat Hydrocarbon	Lipid	Protein	Chen et al., 2022
517	C10H4NO7	Unknown	Unknown	plant biochar leachate	solid phase extraction, FT-ICR-MS	solid phase extraction, FT-ICR-MS	Cond Hydrocarbon	Cond Hydrocarbon	Other	Chen et al., 2022
518	C11H8NO6	Unknown	Unknown	plant biochar leachate	solid phase extraction, FT-ICR-MS	solid phase extraction, FT-ICR-MS	Cond Hydrocarbon	Cond Hydrocarbon	Other	Chen et al., 2022; Yan et al., 2022
519	C15H8NO3	Unknown	Unknown	plant biochar leachate	solid phase extraction, FT-ICR-MS	solid phase extraction, FT-ICR-MS	Cond Hydrocarbon	Cond Hydrocarbon	Other	Chen et al., 2022
520	C12H12NO5	Unknown	Unknown	plant biochar leachate	solid phase extraction, FT-ICR-MS	solid phase extraction, FT-ICR-MS	Lignin	Lignin	Other	Chen et al., 2022; Yan et al., 2022
521	C8H16N3O4S	Unknown	Unknown	plant biochar leachate	solid phase extraction, FT-ICR-MS	solid phase extraction, FT-ICR-MS	Protein	Protein	Protein	Chen et al., 2022
522	C16H12NO2	Unknown	Unknown	plant biochar leachate	solid phase extraction, FT-ICR-MS	solid phase extraction, FT-ICR-MS	Unsat Hydrocarbon;Cond Hydrocarbon	Cond Hydrocarbon	Other	Chen et al., 2022
523	C13H16NO4	Unknown	Unknown	plant biochar leachate	solid phase extraction, FT-ICR-MS	solid phase extraction, FT-ICR-MS	Lignin	Lignin	Other	Chen et al., 2022; Yan et al., 2022
524	C14H20NO3	Unknown	Unknown	plant biochar leachate	solid phase extraction, FT-ICR-MS	solid phase extraction, FT-ICR-MS	Other	Lignin	Other	Chen et al., 2022
525	C10H3O8	Unknown	Unknown	plant biochar leachate	solid phase extraction, FT-ICR-MS	solid phase extraction, FT-ICR-MS	Other	Cond Hydrocarbon	Other	Chen et al., 2022
526	C11H7O7	Unknown	Unknown	plant biochar leachate	solid phase extraction, FT-ICR-MS	solid phase extraction, FT-ICR-MS	Cond Hydrocarbon	Cond Hydrocarbon	Other	Chen et al., 2022; Yan et al., 2022
527	C8H11O7S	Unknown	Unknown	plant biochar leachate	solid phase extraction, FT-ICR-MS	solid phase extraction, FT-ICR-MS	Other	Tannin	Other	Chen et al., 2022
528	C10H7N2O6	Unknown	Unknown	plant biochar leachate	solid phase extraction, FT-ICR-MS	solid phase extraction, FT-ICR-MS	Cond Hydrocarbon	Cond Hydrocarbon	Other	Chen et al., 2022
529	C15H7O4	Unknown	Unknown	plant biochar leachate	solid phase extraction, FT-ICR-MS	solid phase extraction, FT-ICR-MS	Cond Hydrocarbon	Cond Hydrocarbon	Other	Chen et al., 2022; Yan et al., 2022
530	C12H11O6	Unknown	Unknown	plant biochar leachate	solid phase extraction, FT-ICR-MS	solid phase extraction, FT-ICR-MS	Lignin	Lignin	Other	Chen et al., 2022; Yan et al., 2022
531	C9H15O6S	Unknown	Unknown	plant biochar leachate	solid phase extraction, FT-ICR-MS	solid phase extraction, FT-ICR-MS	Amino Sugar	Amino Sugar	Other	Chen et al., 2022
532	C11H11N2O5	Unknown	Unknown	plant biochar leachate	solid phase extraction, FT-ICR-MS	solid phase extraction, FT-ICR-MS	Lignin	Lignin	Protein	Chen et al., 2022; Yan et al., 2022
533	C16H11O3	Unknown	Unknown	plant biochar leachate	solid phase extraction, FT-ICR-MS	solid phase extraction, FT-ICR-MS	Cond Hydrocarbon	Cond Hydrocarbon	Other	Chen et al., 2022; Yan et al., 2022
534	C9H15O8	Unknown	Unknown	plant biochar leachate	solid phase extraction, FT-ICR-MS	solid phase extraction, FT-ICR-MS	Carbohydrate	Carbohydrate	Carbohydrate	Chen et al., 2022
535	C13H15O5	Unknown	Unknown	plant biochar leachate	solid phase extraction, FT-ICR-MS	solid phase extraction, FT-ICR-MS	Lignin	Lignin	Other	Chen et al., 2022; Yan et al., 2022
536	C12H15N2O4	Unknown	Unknown	plant biochar leachate	solid phase extraction, FT-ICR-MS	solid phase extraction, FT-ICR-MS	Lignin	Lignin	Protein	Chen et al., 2022; Yan et al., 2022
537	C17H15O2	Unknown	Unknown	plant biochar leachate	solid phase extraction, FT-ICR-MS	solid phase extraction, FT-ICR-MS	Unsat Hydrocarbon	Unsat Hydrocarbon	Other	Chen et al., 2022
538	C14H19O4	Unknown	Unknown	plant biochar leachate	solid phase extraction, FT-ICR-MS	solid phase extraction, FT-ICR-MS	Lignin	Lignin	Other	Chen et al., 2022
539	C13H19N2O3	Unknown	Unknown	plant biochar leachate	solid phase extraction, FT-ICR-MS	solid phase extraction, FT-ICR-MS	Other	Lignin	Protein	Chen et al., 2022
540	C10H6NO7	Unknown	Unknown	plant biochar leachate	solid phase extraction, FT-ICR-MS	solid phase extraction, FT-ICR-MS	Cond Hydrocarbon	Cond Hydrocarbon	Other	Chen et al., 2022; Yan et al., 2022
541	C11H10NO6	Unknown	Unknown	plant biochar leachate	solid phase extraction, FT-ICR-MS	solid phase extraction, FT-ICR-MS	Lignin	Lignin	Other	Chen et al., 2022; Yan et al., 2022
542	C8H14NO6S	Unknown	Unknown	plant biochar leachate	solid phase extraction, FT-ICR-MS	solid phase extraction, FT-ICR-MS	Carbohydrate	Carbohydrate	Other	Chen et al., 2022
543	C15H10NO3	Unknown	Unknown	plant biochar leachate	solid phase extraction, FT-ICR-MS	solid phase extraction, FT-ICR-MS	Cond Hydrocarbon	Cond Hydrocarbon	Other	Chen et al., 2022; Yan et al., 2022
544	C12H14NO3S	Unknown	Unknown	plant biochar leachate	solid phase extraction, FT-ICR-MS	solid phase extraction, FT-ICR-MS	Other	Lignin	Other	Chen et al., 2022
545	C12H14NO5	Unknown	Unknown	plant biochar leachate	solid phase extraction, FT-ICR-MS	solid phase extraction, FT-ICR-MS	Lignin	Lignin	Other	Chen et al., 2022; Yan et al., 2022
546	C16H14NO2	Unknown	Unknown	plant biochar leachate	solid phase extraction, FT-ICR-MS	solid phase extraction, FT-ICR-MS	Unsat Hydrocarbon	Unsat Hydrocarbon	Other	Chen et al., 2022
547	C13H18NO4	Unknown	Unknown	plant biochar leachate	solid phase extraction, FT-ICR-MS	solid phase extraction, FT-ICR-MS	Lignin	Lignin	Other	Chen et al., 2022
548	C10H5O8	Unknown	Unknown	plant biochar leachate	solid phase extraction, FT-ICR-MS	solid phase extraction, FT-ICR-MS	Other	Cond Hydrocarbon	Other	Chen et al., 2022; Yan et al., 2022
549	C11H9O5S	Unknown	Unknown	plant biochar leachate	solid phase extraction, FT-ICR-MS	solid phase extraction, FT-ICR-MS	Lignin	Lignin	Other	Chen et al., 2022
550	C11H9O7	Unknown	Unknown	plant biochar leachate	solid phase extraction, FT-ICR-MS	solid phase extraction, FT-ICR-MS	Lignin	Lignin	Other	Chen et al., 2022; Yan et al., 2022
551	C8H13O7S	Unknown	Unknown	plant biochar leachate	solid phase extraction, FT-ICR-MS	solid phase extraction, FT-ICR-MS	Carbohydrate	Carbohydrate	Other	Chen et al., 2022
552	C10H9N2O6	Unknown	Unknown	plant biochar leachate	solid phase extraction, FT-ICR-MS	solid phase extraction, FT-ICR-MS	Lignin	Lignin	Other	Chen et al., 2022
553	C15H9O4	Unknown	Unknown	plant biochar leachate	solid phase extraction, FT-ICR-MS	solid phase extraction, FT-ICR-MS	Cond Hydrocarbon	Cond Hydrocarbon	Other	Chen et al., 2022; Yan et al., 2022
554	C12H13O4S	Unknown	Unknown	plant biochar leachate	solid phase extraction, FT-ICR-MS	solid phase extraction, FT-ICR-MS	Lignin	Lignin	Other	Chen et al., 2022
555	C12H13O6	Unknown	Unknown	plant biochar leachate	solid phase extraction, FT-ICR-MS	solid phase extraction, FT-ICR-MS	Lignin	Lignin	Other	Chen et al., 2022; Yan et al., 2022
556	C9H17O6S	Unknown	Unknown	plant biochar leachate	solid phase extraction, FT-ICR-MS	solid phase extraction, FT-ICR-MS	Other	Amino Sugar	Other	Chen et al., 2022
557	C11H13N2O5	Unknown	Unknown	plant biochar leachate	solid phase extraction, FT-ICR-MS	solid phase extraction, FT-ICR-MS	Lignin	Lignin	Protein	Chen et al., 2022
558	C16H13O3	Unknown	Unknown	plant biochar leachate	solid phase extraction, FT-ICR-MS	solid phase extraction, FT-ICR-MS	Other	Lignin	Other	Chen et al., 2022; Yan et al., 2022
559	C13H17O5	Unknown	Unknown	plant biochar leachate	solid phase extraction, FT-ICR-MS	solid phase extraction, FT-ICR-MS	Lignin	Lignin	Other	Chen et al., 2022
560	C12H17N2O4	Unknown	Unknown	plant biochar leachate	solid phase extraction, FT-ICR-MS	solid phase extraction, FT-ICR-MS	Lignin	Lignin	Protein	Chen et al., 2022
561	C17H17O2	Unknown	Unknown	plant biochar leachate	solid phase extraction, FT-ICR-MS	solid phase extraction, FT-ICR-MS	Unsat Hydrocarbon	Unsat Hydrocarbon	Other	Chen et al., 2022; Yan et al., 2022
562	C14H21O4	Unknown	Unknown	plant biochar leachate	solid phase extraction, FT-ICR-MS	solid phase extraction, FT-ICR-MS	Other	Lipid	Other	Chen et al., 2022
563	C13H21N2O3	Unknown	Unknown	plant biochar leachate	solid phase extraction, FT-ICR-MS	solid phase extraction, FT-ICR-MS	Lipid	Lipid	Protein	Chen et al., 2022
564	C9H4NO8	Unknown	Unknown	plant biochar leachate	solid phase extraction, FT-ICR-MS	solid phase extraction, FT-ICR-MS	Other	Cond Hydrocarbon	Other	Chen et al., 2022; Yan et al., 2022
565	C10H8NO7	Unknown	Unknown	plant biochar leachate	solid phase extraction, FT-ICR-MS	solid phase extraction, FT-ICR-MS	Tannin;Cond Hydrocarbon	Tannin	Other	Chen et al., 2022; Yan et al., 2022
566	C14H8NO4	Unknown	Unknown	plant biochar leachate	solid phase extraction, FT-ICR-MS	solid phase extraction, FT-ICR-MS	Cond Hydrocarbon	Cond Hydrocarbon	Other	Chen et al., 2022; Yan et al., 2022
567	C11H12NO6	Unknown	Unknown	plant biochar leachate	solid phase extraction, FT-ICR-MS	solid phase extraction, FT-ICR-MS	Lignin	Lignin	Other	Chen et al., 2022; Yan et al., 2022
568	C15H12NO3	Unknown	Unknown	plant biochar leachate	solid phase extraction, FT-ICR-MS	solid phase extraction, FT-ICR-MS	Cond Hydrocarbon	Lignin	Other	Chen et al., 2022; Yan et al., 2022
569	C12H16NO3S	Unknown	Unknown	plant biochar leachate	solid phase extraction, FT-ICR-MS	solid phase extraction, FT-ICR-MS	Other	Lignin	Other	Chen et al., 2022
570	C8H16NO8	Unknown	Unknown	plant biochar leachate	solid phase extraction, FT-ICR-MS	solid phase extraction, FT-ICR-MS	Carbohydrate	Carbohydrate	Other	Chen et al., 2022
571	C12H16NO5	Unknown	Unknown	plant biochar leachate	solid phase extraction, FT-ICR-MS	solid phase extraction, FT-ICR-MS	Lignin	Lignin	Other	Chen et al., 2022
572	C16H16NO2	Unknown	Unknown	plant biochar leachate	solid phase extraction, FT-ICR-MS	solid phase extraction, FT-ICR-MS	Unsat Hydrocarbon	Unsat Hydrocarbon	Other	Chen et al., 2022
573	C13H20NO4	Unknown	Unknown	plant biochar leachate	solid phase extraction, FT-ICR-MS	solid phase extraction, FT-ICR-MS	Protein	Protein	Other	Chen et al., 2022
574	C10H7O6S	Unknown	Unknown	plant biochar leachate	solid phase extraction, FT-ICR-MS	solid phase extraction, FT-ICR-MS	Cond Hydrocarbon	Cond Hydrocarbon	Other	Chen et al., 2022
575	C10H7O8	Unknown	Unknown	plant biochar leachate	solid phase extraction, FT-ICR-MS	solid phase extraction, FT-ICR-MS	Tannin	Cond Hydrocarbon	Other	Chen et al., 2022; Yan et al., 2022
576	C9H7N2O7	Unknown	Unknown	plant biochar leachate	solid phase extraction, FT-ICR-MS	solid phase extraction, FT-ICR-MS	Tannin	Cond Hydrocarbon	Other	Chen et al., 2022
577	C14H7O5	Unknown	Unknown	plant biochar leachate	solid phase extraction, FT-ICR-MS	solid phase extraction, FT-ICR-MS	Cond Hydrocarbon	Cond Hydrocarbon	Other	Chen et al., 2022; Yan et al., 2022
578	C11H11O5S	Unknown	Unknown	plant biochar leachate	solid phase extraction, FT-ICR-MS	solid phase extraction, FT-ICR-MS	Lignin	Lignin	Other	Chen et al., 2022
579	C13H7N2O4	Unknown	Unknown	plant biochar leachate	solid phase extraction, FT-ICR-MS	solid phase extraction, FT-ICR-MS	Cond Hydrocarbon	Cond Hydrocarbon	Other	Chen et al., 2022
580	C18H7O2	Unknown	Unknown	plant biochar leachate	solid phase extraction, FT-ICR-MS	solid phase extraction, FT-ICR-MS	Other	Cond Hydrocarbon	Other	Chen et al., 2022
581	C11H11O7	Unknown	Unknown	plant biochar leachate	solid phase extraction, FT-ICR-MS	solid phase extraction, FT-ICR-MS	Lignin	Lignin	Other	Chen et al., 2022; Yan et al., 2022
582	C10H11N2O6	Unknown	Unknown	plant biochar leachate	solid phase extraction, FT-ICR-MS	solid phase extraction, FT-ICR-MS	Lignin	Lignin	Protein	Chen et al., 2022
583	C15H11O4	Unknown	Unknown	plant biochar leachate	solid phase extraction, FT-ICR-MS	solid phase extraction, FT-ICR-MS	Cond Hydrocarbon	Cond Hydrocarbon	Other	Chen et al., 2022; Yan et al., 2022
584	C14H11N2O3	Unknown	Unknown	plant biochar leachate	solid phase extraction, FT-ICR-MS	solid phase extraction, FT-ICR-MS	Cond Hydrocarbon	Cond Hydrocarbon	Other	Chen et al., 2022
585	C12H15O6	Unknown	Unknown	plant biochar leachate	solid phase extraction, FT-ICR-MS	solid phase extraction, FT-ICR-MS	Lignin	Lignin	Other	Chen et al., 2022; Yan et al., 2022
586	C11H15N2O5	Unknown	Unknown	plant biochar leachate	solid phase extraction, FT-ICR-MS	solid phase extraction, FT-ICR-MS	Lignin	Lignin	Protein	Chen et al., 2022
587	C16H15O3	Unknown	Unknown	plant biochar leachate	solid phase extraction, FT-ICR-MS	solid phase extraction, FT-ICR-MS	Other	Lignin	Other	Chen et al., 2022; Yan et al., 2022
588	C13H19O5	Unknown	Unknown	plant biochar leachate	solid phase extraction, FT-ICR-MS	solid phase extraction, FT-ICR-MS	Protein	Lignin	Other	Chen et al., 2022
589	C12H19N2O4	Unknown	Unknown	plant biochar leachate	solid phase extraction, FT-ICR-MS	solid phase extraction, FT-ICR-MS	Protein	Protein	Protein	Chen et al., 2022
590	C17H19O2	Unknown	Unknown	plant biochar leachate	solid phase extraction, FT-ICR-MS	solid phase extraction, FT-ICR-MS	Unsat Hydrocarbon	Unsat Hydrocarbon	Other	Chen et al., 2022; Yan et al., 2022
591	C14H23O4	Unknown	Unknown	plant biochar leachate	solid phase extraction, FT-ICR-MS	solid phase extraction, FT-ICR-MS	Lipid	Lipid	Other	Chen et al., 2022
592	C15H27OS	Unknown	Unknown	plant biochar leachate	solid phase extraction, FT-ICR-MS	solid phase extraction, FT-ICR-MS	Lipid	Lipid;Unsat Hydrocarbon	Other	Chen et al., 2022
593	C9H6NO8	Unknown	Unknown	plant biochar leachate	solid phase extraction, FT-ICR-MS	solid phase extraction, FT-ICR-MS	Other	Cond Hydrocarbon	Other	Chen et al., 2022
594	C13H6NO5	Unknown	Unknown	plant biochar leachate	solid phase extraction, FT-ICR-MS	solid phase extraction, FT-ICR-MS	Cond Hydrocarbon	Cond Hydrocarbon	Other	Chen et al., 2022; Yan et al., 2022
595	C10H10NO7	Unknown	Unknown	plant biochar leachate	solid phase extraction, FT-ICR-MS	solid phase extraction, FT-ICR-MS	Tannin	Tannin	Other	Chen et al., 2022
596	C13H10N3OS	Unknown	Unknown	plant biochar leachate	solid phase extraction, FT-ICR-MS	solid phase extraction, FT-ICR-MS	Unsat Hydrocarbon	Cond Hydrocarbon	Other	Chen et al., 2022
597	C14H10NO4	Unknown	Unknown	plant biochar leachate	solid phase extraction, FT-ICR-MS	solid phase extraction, FT-ICR-MS	Cond Hydrocarbon	Cond Hydrocarbon	Other	Chen et al., 2022; Yan et al., 2022
598	C11H14NO6	Unknown	Unknown	plant biochar leachate	solid phase extraction, FT-ICR-MS	solid phase extraction, FT-ICR-MS	Lignin	Lignin	Other	Chen et al., 2022
599	C15H14NO3	Unknown	Unknown	plant biochar leachate	solid phase extraction, FT-ICR-MS	solid phase extraction, FT-ICR-MS	Other	Lignin	Other	Chen et al., 2022; Yan et al., 2022
600	C12H18NO5	Unknown	Unknown	plant biochar leachate	solid phase extraction, FT-ICR-MS	solid phase extraction, FT-ICR-MS	Protein	Protein	Other	Chen et al., 2022
601	C9H5O7S	Unknown	Unknown	plant biochar leachate	solid phase extraction, FT-ICR-MS	solid phase extraction, FT-ICR-MS	Other	Cond Hydrocarbon	Other	Chen et al., 2022
602	C9H5O9	Unknown	Unknown	plant biochar leachate	solid phase extraction, FT-ICR-MS	solid phase extraction, FT-ICR-MS	Other	Other	Other	Chen et al., 2022
603	C13H5O6	Unknown	Unknown	plant biochar leachate	solid phase extraction, FT-ICR-MS	solid phase extraction, FT-ICR-MS	Cond Hydrocarbon	Cond Hydrocarbon	Other	Chen et al., 2022; Yan et al., 2022
604	C10H9O6S	Unknown	Unknown	plant biochar leachate	solid phase extraction, FT-ICR-MS	solid phase extraction, FT-ICR-MS	Lignin	Lignin	Other	Chen et al., 2022
605	C10H9O8	Unknown	Unknown	plant biochar leachate	solid phase extraction, FT-ICR-MS	solid phase extraction, FT-ICR-MS	Tannin	Tannin	Other	Chen et al., 2022; Yan et al., 2022
606	C14H9O5	Unknown	Unknown	plant biochar leachate	solid phase extraction, FT-ICR-MS	solid phase extraction, FT-ICR-MS	Cond Hydrocarbon	Cond Hydrocarbon	Other	Chen et al., 2022; Yan et al., 2022
607	C11H13O5S	Unknown	Unknown	plant biochar leachate	solid phase extraction, FT-ICR-MS	solid phase extraction, FT-ICR-MS	Lignin	Lignin	Other	Chen et al., 2022
608	C13H9N2O4	Unknown	Unknown	plant biochar leachate	solid phase extraction, FT-ICR-MS	solid phase extraction, FT-ICR-MS	Cond Hydrocarbon	Cond Hydrocarbon	Other	Chen et al., 2022; Yan et al., 2022
609	C11H13O7	Unknown	Unknown	plant biochar leachate	solid phase extraction, FT-ICR-MS	solid phase extraction, FT-ICR-MS	Lignin	Lignin	Other	Chen et al., 2022; Yan et al., 2022
610	C10H13N2O6	Unknown	Unknown	plant biochar leachate	solid phase extraction, FT-ICR-MS	solid phase extraction, FT-ICR-MS	Lignin	Lignin	Protein	Chen et al., 2022
611	C15H13O4	Unknown	Unknown	plant biochar leachate	solid phase extraction, FT-ICR-MS	solid phase extraction, FT-ICR-MS	Other	Lignin	Other	Chen et al., 2022; Yan et al., 2022
612	C14H13N2O3	Unknown	Unknown	plant biochar leachate	solid phase extraction, FT-ICR-MS	solid phase extraction, FT-ICR-MS	Other	Lignin	Protein	Chen et al., 2022
613	C12H17O6	Unknown	Unknown	plant biochar leachate	solid phase extraction, FT-ICR-MS	solid phase extraction, FT-ICR-MS	Lignin	Lignin	Other	Chen et al., 2022; Yan et al., 2022
614	C11H17N2O5	Unknown	Unknown	plant biochar leachate	solid phase extraction, FT-ICR-MS	solid phase extraction, FT-ICR-MS	Protein	Protein	Protein	Chen et al., 2022
615	C16H17O3	Unknown	Unknown	plant biochar leachate	solid phase extraction, FT-ICR-MS	solid phase extraction, FT-ICR-MS	Other	Lignin	Other	Chen et al., 2022; Yan et al., 2022
616	C13H21O5	Unknown	Unknown	plant biochar leachate	solid phase extraction, FT-ICR-MS	solid phase extraction, FT-ICR-MS	Protein	Protein	Other	Chen et al., 2022; Yan et al., 2022
617	C12H21N2O4	Unknown	Unknown	plant biochar leachate	solid phase extraction, FT-ICR-MS	solid phase extraction, FT-ICR-MS	Protein	Protein	Protein	Chen et al., 2022
618	C16H21N2O	Unknown	Unknown	plant biochar leachate	solid phase extraction, FT-ICR-MS	solid phase extraction, FT-ICR-MS	Unsat Hydrocarbon	Unsat Hydrocarbon	Other	Chen et al., 2022
619	C14H25O4	Unknown	Unknown	plant biochar leachate	solid phase extraction, FT-ICR-MS	solid phase extraction, FT-ICR-MS	Lipid	Lipid	Other	Chen et al., 2022
620	C12H4NO6	Unknown	Unknown	plant biochar leachate	solid phase extraction, FT-ICR-MS	solid phase extraction, FT-ICR-MS	Cond Hydrocarbon	Cond Hydrocarbon	Other	Chen et al., 2022; Yan et al., 2022
621	C13H8NO5	Unknown	Unknown	plant biochar leachate	solid phase extraction, FT-ICR-MS	solid phase extraction, FT-ICR-MS	Cond Hydrocarbon	Cond Hydrocarbon	Other	Chen et al., 2022; Yan et al., 2022
622	C10H12NO7	Unknown	Unknown	plant biochar leachate	solid phase extraction, FT-ICR-MS	solid phase extraction, FT-ICR-MS	Tannin	Tannin	Other	Chen et al., 2022
623	C14H12NO4	Unknown	Unknown	plant biochar leachate	solid phase extraction, FT-ICR-MS	solid phase extraction, FT-ICR-MS	Lignin	Lignin	Other	Chen et al., 2022; Yan et al., 2022
624	C11H16NO6	Unknown	Unknown	plant biochar leachate	solid phase extraction, FT-ICR-MS	solid phase extraction, FT-ICR-MS	Protein;Amino Sugar	Lignin	Other	Chen et al., 2022
625	C15H16NO3	Unknown	Unknown	plant biochar leachate	solid phase extraction, FT-ICR-MS	solid phase extraction, FT-ICR-MS	Other	Lignin	Other	Chen et al., 2022
626	C12H20NO5	Unknown	Unknown	plant biochar leachate	solid phase extraction, FT-ICR-MS	solid phase extraction, FT-ICR-MS	Protein	Protein	Other	Chen et al., 2022
627	C8H3O8S	Unknown	Unknown	plant biochar leachate	solid phase extraction, FT-ICR-MS	solid phase extraction, FT-ICR-MS	Other	Other	Other	Chen et al., 2022
628	C12H3O7	Unknown	Unknown	plant biochar leachate	solid phase extraction, FT-ICR-MS	solid phase extraction, FT-ICR-MS	Other	Cond Hydrocarbon	Other	Chen et al., 2022
629	C9H7O7S	Unknown	Unknown	plant biochar leachate	solid phase extraction, FT-ICR-MS	solid phase extraction, FT-ICR-MS	Tannin	Cond Hydrocarbon	Other	Chen et al., 2022
630	C9H7O9	Unknown	Unknown	plant biochar leachate	solid phase extraction, FT-ICR-MS	solid phase extraction, FT-ICR-MS	Tannin	Other	Other	Chen et al., 2022
631	C13H7O6	Unknown	Unknown	plant biochar leachate	solid phase extraction, FT-ICR-MS	solid phase extraction, FT-ICR-MS	Cond Hydrocarbon	Cond Hydrocarbon	Other	Chen et al., 2022; Yan et al., 2022
632	C10H11O6S	Unknown	Unknown	plant biochar leachate	solid phase extraction, FT-ICR-MS	solid phase extraction, FT-ICR-MS	Lignin	Lignin	Other	Chen et al., 2022
633	C12H7N2O5	Unknown	Unknown	plant biochar leachate	solid phase extraction, FT-ICR-MS	solid phase extraction, FT-ICR-MS	Cond Hydrocarbon	Cond Hydrocarbon	Other	Chen et al., 2022; Yan et al., 2022
634	C10H11O8	Unknown	Unknown	plant biochar leachate	solid phase extraction, FT-ICR-MS	solid phase extraction, FT-ICR-MS	Tannin	Tannin	Other	Chen et al., 2022
635	C9H11N2O7	Unknown	Unknown	plant biochar leachate	solid phase extraction, FT-ICR-MS	solid phase extraction, FT-ICR-MS	Tannin	Tannin	Protein	Chen et al., 2022
636	C14H11O5	Unknown	Unknown	plant biochar leachate	solid phase extraction, FT-ICR-MS	solid phase extraction, FT-ICR-MS	Cond Hydrocarbon	Cond Hydrocarbon	Other	Chen et al., 2022; Yan et al., 2022
637	C13H11N2O4	Unknown	Unknown	plant biochar leachate	solid phase extraction, FT-ICR-MS	solid phase extraction, FT-ICR-MS	Lignin	Lignin	Other	Chen et al., 2022; Yan et al., 2022
638	C11H15O7	Unknown	Unknown	plant biochar leachate	solid phase extraction, FT-ICR-MS	solid phase extraction, FT-ICR-MS	Lignin;Amino Sugar	Lignin	Other	Chen et al., 2022
639	C10H15N2O6	Unknown	Unknown	plant biochar leachate	solid phase extraction, FT-ICR-MS	solid phase extraction, FT-ICR-MS	Amino Sugar	Amino Sugar	Protein	Chen et al., 2022
640	C15H15O4	Unknown	Unknown	plant biochar leachate	solid phase extraction, FT-ICR-MS	solid phase extraction, FT-ICR-MS	Other	Lignin	Other	Chen et al., 2022; Yan et al., 2022
641	C14H15N2O3	Unknown	Unknown	plant biochar leachate	solid phase extraction, FT-ICR-MS	solid phase extraction, FT-ICR-MS	Other	Lignin	Protein	Chen et al., 2022
642	C12H19O6	Unknown	Unknown	plant biochar leachate	solid phase extraction, FT-ICR-MS	solid phase extraction, FT-ICR-MS	Protein	Protein	Other	Chen et al., 2022; Yan et al., 2022
643	C11H19N2O5	Unknown	Unknown	plant biochar leachate	solid phase extraction, FT-ICR-MS	solid phase extraction, FT-ICR-MS	Protein	Protein	Protein	Chen et al., 2022
644	C16H19O3	Unknown	Unknown	plant biochar leachate	solid phase extraction, FT-ICR-MS	solid phase extraction, FT-ICR-MS	Other	Lignin	Other	Chen et al., 2022; Yan et al., 2022
645	C13H23O5	Unknown	Unknown	plant biochar leachate	solid phase extraction, FT-ICR-MS	solid phase extraction, FT-ICR-MS	Protein	Protein	Other	Chen et al., 2022; Goranov et al., 2020
646	C16H23N2O	Unknown	Unknown	plant biochar leachate	solid phase extraction, FT-ICR-MS	solid phase extraction, FT-ICR-MS	Unsat Hydrocarbon	Unsat Hydrocarbon	Other	Chen et al., 2022
647	C8H6NO7S	Unknown	Unknown	plant biochar leachate	solid phase extraction, FT-ICR-MS	solid phase extraction, FT-ICR-MS	Tannin	Cond Hydrocarbon	Other	Chen et al., 2022
648	C12H6NO6	Unknown	Unknown	plant biochar leachate	solid phase extraction, FT-ICR-MS	solid phase extraction, FT-ICR-MS	Cond Hydrocarbon	Cond Hydrocarbon	Other	Chen et al., 2022; Yan et al., 2022
649	C9H10NO8	Unknown	Unknown	plant biochar leachate	solid phase extraction, FT-ICR-MS	solid phase extraction, FT-ICR-MS	Tannin	Tannin	Other	Chen et al., 2022
650	C13H10NO5	Unknown	Unknown	plant biochar leachate	solid phase extraction, FT-ICR-MS	solid phase extraction, FT-ICR-MS	Cond Hydrocarbon	Cond Hydrocarbon	Other	Chen et al., 2022; Yan et al., 2022
651	C10H14NO7	Unknown	Unknown	plant biochar leachate	solid phase extraction, FT-ICR-MS	solid phase extraction, FT-ICR-MS	Amino Sugar	Tannin	Other	Chen et al., 2022
652	C14H14NO4	Unknown	Unknown	plant biochar leachate	solid phase extraction, FT-ICR-MS	solid phase extraction, FT-ICR-MS	Lignin	Lignin	Other	Chen et al., 2022; Yan et al., 2022
653	C13H14N3O3	Unknown	Unknown	plant biochar leachate	solid phase extraction, FT-ICR-MS	solid phase extraction, FT-ICR-MS	Other	Lignin	Protein	Chen et al., 2022
654	C11H18NO6	Unknown	Unknown	plant biochar leachate	solid phase extraction, FT-ICR-MS	solid phase extraction, FT-ICR-MS	Protein;Amino Sugar	Protein	Other	Chen et al., 2022
655	C15H18NO3	Unknown	Unknown	plant biochar leachate	solid phase extraction, FT-ICR-MS	solid phase extraction, FT-ICR-MS	Other	Lignin	Other	Chen et al., 2022
656	C12H22NO5	Unknown	Unknown	plant biochar leachate	solid phase extraction, FT-ICR-MS	solid phase extraction, FT-ICR-MS	Protein	Protein	Other	Chen et al., 2022
657	C8H5O8S	Unknown	Unknown	plant biochar leachate	solid phase extraction, FT-ICR-MS	solid phase extraction, FT-ICR-MS	Other	Other	Other	Chen et al., 2022
658	C12H5O7	Unknown	Unknown	plant biochar leachate	solid phase extraction, FT-ICR-MS	solid phase extraction, FT-ICR-MS	Cond Hydrocarbon	Cond Hydrocarbon	Other	Chen et al., 2022; Yan et al., 2022
659	C9H9O7S	Unknown	Unknown	plant biochar leachate	solid phase extraction, FT-ICR-MS	solid phase extraction, FT-ICR-MS	Tannin	Tannin	Other	Chen et al., 2022
660	C15H5N2OS	Unknown	Unknown	plant biochar leachate	solid phase extraction, FT-ICR-MS	solid phase extraction, FT-ICR-MS	Other	Cond Hydrocarbon	Other	Chen et al., 2022
661	C9H9O9	Unknown	Unknown	plant biochar leachate	solid phase extraction, FT-ICR-MS	solid phase extraction, FT-ICR-MS	Tannin	Tannin	Other	Chen et al., 2022
662	C8H9N2O8	Unknown	Unknown	plant biochar leachate	solid phase extraction, FT-ICR-MS	solid phase extraction, FT-ICR-MS	Tannin	Tannin	Other	Chen et al., 2022
663	C13H9O6	Unknown	Unknown	plant biochar leachate	solid phase extraction, FT-ICR-MS	solid phase extraction, FT-ICR-MS	Cond Hydrocarbon	Cond Hydrocarbon	Other	Chen et al., 2022; Goranov et al., 2020; Yan et al., 2022
664	C10H13O6S	Unknown	Unknown	plant biochar leachate	solid phase extraction, FT-ICR-MS	solid phase extraction, FT-ICR-MS	Lignin	Lignin	Other	Chen et al., 2022
665	C12H9N2O5	Unknown	Unknown	plant biochar leachate	solid phase extraction, FT-ICR-MS	solid phase extraction, FT-ICR-MS	Cond Hydrocarbon	Cond Hydrocarbon	Other	Chen et al., 2022; Yan et al., 2022
666	C17H9O3	Unknown	Unknown	plant biochar leachate	solid phase extraction, FT-ICR-MS	solid phase extraction, FT-ICR-MS	Cond Hydrocarbon	Cond Hydrocarbon	Other	Chen et al., 2022
667	C10H13O8	Unknown	Unknown	plant biochar leachate	solid phase extraction, FT-ICR-MS	solid phase extraction, FT-ICR-MS	Tannin	Tannin	Other	Chen et al., 2022
668	C9H13N2O7	Unknown	Unknown	plant biochar leachate	solid phase extraction, FT-ICR-MS	solid phase extraction, FT-ICR-MS	Other	Tannin	Protein	Chen et al., 2022
669	C14H13O5	Unknown	Unknown	plant biochar leachate	solid phase extraction, FT-ICR-MS	solid phase extraction, FT-ICR-MS	Lignin	Lignin	Other	Chen et al., 2022; Yan et al., 2022
670	C13H13N2O4	Unknown	Unknown	plant biochar leachate	solid phase extraction, FT-ICR-MS	solid phase extraction, FT-ICR-MS	Lignin	Lignin	Protein	Chen et al., 2022; Yan et al., 2022
671	C18H13O2	Unknown	Unknown	plant biochar leachate	solid phase extraction, FT-ICR-MS	solid phase extraction, FT-ICR-MS	Unsat Hydrocarbon	Cond Hydrocarbon	Other	Chen et al., 2022; Yan et al., 2022
672	C11H17O7	Unknown	Unknown	plant biochar leachate	solid phase extraction, FT-ICR-MS	solid phase extraction, FT-ICR-MS	Amino Sugar	Amino Sugar	Other	Chen et al., 2022
673	C17H13N2O	Unknown	Unknown	plant biochar leachate	solid phase extraction, FT-ICR-MS	solid phase extraction, FT-ICR-MS	Unsat Hydrocarbon	Cond Hydrocarbon	Other	Chen et al., 2022
674	C15H17O4	Unknown	Unknown	plant biochar leachate	solid phase extraction, FT-ICR-MS	solid phase extraction, FT-ICR-MS	Other	Lignin	Other	Chen et al., 2022; Yan et al., 2022
675	C14H17N2O3	Unknown	Unknown	plant biochar leachate	solid phase extraction, FT-ICR-MS	solid phase extraction, FT-ICR-MS	Other	Lignin	Protein	Chen et al., 2022
676	C12H21O6	Unknown	Unknown	plant biochar leachate	solid phase extraction, FT-ICR-MS	solid phase extraction, FT-ICR-MS	Protein	Protein	Other	Chen et al., 2022
677	C16H21O3	Unknown	Unknown	plant biochar leachate	solid phase extraction, FT-ICR-MS	solid phase extraction, FT-ICR-MS	Other	Lignin	Other	Chen et al., 2022
678	C15H21N2O2	Unknown	Unknown	plant biochar leachate	solid phase extraction, FT-ICR-MS	solid phase extraction, FT-ICR-MS	Unsat Hydrocarbon	Lignin	Protein	Chen et al., 2022
679	C11H4NO7	Unknown	Unknown	plant biochar leachate	solid phase extraction, FT-ICR-MS	solid phase extraction, FT-ICR-MS	Cond Hydrocarbon	Cond Hydrocarbon	Other	Chen et al., 2022
680	C8H8NO7S	Unknown	Unknown	plant biochar leachate	solid phase extraction, FT-ICR-MS	solid phase extraction, FT-ICR-MS	Tannin	Tannin	Other	Chen et al., 2022
681	C12H8NO6	Unknown	Unknown	plant biochar leachate	solid phase extraction, FT-ICR-MS	solid phase extraction, FT-ICR-MS	Cond Hydrocarbon	Cond Hydrocarbon	Other	Chen et al., 2022; Yan et al., 2022
682	C9H12NO8	Unknown	Unknown	plant biochar leachate	solid phase extraction, FT-ICR-MS	solid phase extraction, FT-ICR-MS	Other	Tannin	Other	Chen et al., 2022
683	C13H12NO5	Unknown	Unknown	plant biochar leachate	solid phase extraction, FT-ICR-MS	solid phase extraction, FT-ICR-MS	Lignin	Lignin	Other	Chen et al., 2022; Yan et al., 2022
684	C14H16NO2S	Unknown	Unknown	plant biochar leachate	solid phase extraction, FT-ICR-MS	solid phase extraction, FT-ICR-MS	Unsat Hydrocarbon	Lignin	Other	Chen et al., 2022
685	C10H16NO7	Unknown	Unknown	plant biochar leachate	solid phase extraction, FT-ICR-MS	solid phase extraction, FT-ICR-MS	Carbohydrate;Amino Sugar	Amino Sugar	Other	Chen et al., 2022
686	C14H16NO4	Unknown	Unknown	plant biochar leachate	solid phase extraction, FT-ICR-MS	solid phase extraction, FT-ICR-MS	Lignin	Lignin	Other	Chen et al., 2022; Yan et al., 2022
687	C11H20NO4S	Unknown	Unknown	plant biochar leachate	solid phase extraction, FT-ICR-MS	solid phase extraction, FT-ICR-MS	Protein	Protein	Other	Chen et al., 2022
688	C10H20N3O5	Unknown	Unknown	plant biochar leachate	solid phase extraction, FT-ICR-MS	solid phase extraction, FT-ICR-MS	Protein	Protein	Protein	Chen et al., 2022
689	C15H20NO3	Unknown	Unknown	plant biochar leachate	solid phase extraction, FT-ICR-MS	solid phase extraction, FT-ICR-MS	Other	Lignin	Other	Chen et al., 2022
690	C17H28NO	Unknown	Unknown	plant biochar leachate	solid phase extraction, FT-ICR-MS	solid phase extraction, FT-ICR-MS	Lipid	Lipid;Unsat Hydrocarbon	Other	Chen et al., 2022
691	C11H3O8	Unknown	Unknown	plant biochar leachate	solid phase extraction, FT-ICR-MS	solid phase extraction, FT-ICR-MS	Other	Cond Hydrocarbon	Other	Chen et al., 2022
692	C8H7O8S	Unknown	Unknown	plant biochar leachate	solid phase extraction, FT-ICR-MS	solid phase extraction, FT-ICR-MS	Tannin	Tannin	Other	Chen et al., 2022
693	C12H7O7	Unknown	Unknown	plant biochar leachate	solid phase extraction, FT-ICR-MS	solid phase extraction, FT-ICR-MS	Cond Hydrocarbon	Cond Hydrocarbon	Other	Chen et al., 2022; Yan et al., 2022
694	C9H11O7S	Unknown	Unknown	plant biochar leachate	solid phase extraction, FT-ICR-MS	solid phase extraction, FT-ICR-MS	Tannin	Tannin	Other	Chen et al., 2022
695	C11H7N2O6	Unknown	Unknown	plant biochar leachate	solid phase extraction, FT-ICR-MS	solid phase extraction, FT-ICR-MS	Cond Hydrocarbon	Cond Hydrocarbon	Other	Chen et al., 2022; Yan et al., 2022
696	C16H7O4	Unknown	Unknown	plant biochar leachate	solid phase extraction, FT-ICR-MS	solid phase extraction, FT-ICR-MS	Cond Hydrocarbon	Cond Hydrocarbon	Other	Chen et al., 2022
697	C9H11O9	Unknown	Unknown	plant biochar leachate	solid phase extraction, FT-ICR-MS	solid phase extraction, FT-ICR-MS	Tannin	Tannin	Other	Chen et al., 2022
698	C8H11N2O8	Unknown	Unknown	plant biochar leachate	solid phase extraction, FT-ICR-MS	solid phase extraction, FT-ICR-MS	Other	Tannin	Protein	Chen et al., 2022
699	C13H11O6	Unknown	Unknown	plant biochar leachate	solid phase extraction, FT-ICR-MS	solid phase extraction, FT-ICR-MS	Lignin	Lignin	Other	Chen et al., 2022; Yan et al., 2022
700	C10H15O6S	Unknown	Unknown	plant biochar leachate	solid phase extraction, FT-ICR-MS	solid phase extraction, FT-ICR-MS	Amino Sugar	Amino Sugar	Other	Chen et al., 2022
701	C12H11N2O5	Unknown	Unknown	plant biochar leachate	solid phase extraction, FT-ICR-MS	solid phase extraction, FT-ICR-MS	Lignin	Lignin	Protein	Chen et al., 2022; Yan et al., 2022
702	C17H11O3	Unknown	Unknown	plant biochar leachate	solid phase extraction, FT-ICR-MS	solid phase extraction, FT-ICR-MS	Cond Hydrocarbon	Cond Hydrocarbon	Other	Chen et al., 2022; Yan et al., 2022
703	C10H15O8	Unknown	Unknown	plant biochar leachate	solid phase extraction, FT-ICR-MS	solid phase extraction, FT-ICR-MS	Carbohydrate	Carbohydrate	Other	Chen et al., 2022
704	C14H15O5	Unknown	Unknown	plant biochar leachate	solid phase extraction, FT-ICR-MS	solid phase extraction, FT-ICR-MS	Lignin	Lignin	Other	Chen et al., 2022; Yan et al., 2022
705	C13H15N2O4	Unknown	Unknown	plant biochar leachate	solid phase extraction, FT-ICR-MS	solid phase extraction, FT-ICR-MS	Lignin	Lignin	Protein	Chen et al., 2022; Yan et al., 2022
706	C11H19O7	Unknown	Unknown	plant biochar leachate	solid phase extraction, FT-ICR-MS	solid phase extraction, FT-ICR-MS	Amino Sugar	Amino Sugar	Other	Chen et al., 2022
707	C15H19O4	Unknown	Unknown	plant biochar leachate	solid phase extraction, FT-ICR-MS	solid phase extraction, FT-ICR-MS	Other	Lignin	Other	Chen et al., 2022; Yan et al., 2022
708	C14H19N2O3	Unknown	Unknown	plant biochar leachate	solid phase extraction, FT-ICR-MS	solid phase extraction, FT-ICR-MS	Other	Lignin	Protein	Chen et al., 2022
709	C16H23O3	Unknown	Unknown	plant biochar leachate	solid phase extraction, FT-ICR-MS	solid phase extraction, FT-ICR-MS	Other	Lignin	Other	Chen et al., 2022
710	C15H23N2O2	Unknown	Unknown	plant biochar leachate	solid phase extraction, FT-ICR-MS	solid phase extraction, FT-ICR-MS	Other	Lipid	Protein	Chen et al., 2022
711	C7H6NO8S	Unknown	Unknown	plant biochar leachate	solid phase extraction, FT-ICR-MS	solid phase extraction, FT-ICR-MS	Other	Other	Other	Chen et al., 2022
712	C11H6NO7	Unknown	Unknown	plant biochar leachate	solid phase extraction, FT-ICR-MS	solid phase extraction, FT-ICR-MS	Cond Hydrocarbon	Cond Hydrocarbon	Other	Chen et al., 2022; Yan et al., 2022
713	C15H6NO4	Unknown	Unknown	plant biochar leachate	solid phase extraction, FT-ICR-MS	solid phase extraction, FT-ICR-MS	Cond Hydrocarbon	Cond Hydrocarbon	Other	Chen et al., 2022; Yan et al., 2022
714	C19H6NO	Unknown	Unknown	plant biochar leachate	solid phase extraction, FT-ICR-MS	solid phase extraction, FT-ICR-MS	Other	Cond Hydrocarbon	Other	Chen et al., 2022
715	C12H10NO6	Unknown	Unknown	plant biochar leachate	solid phase extraction, FT-ICR-MS	solid phase extraction, FT-ICR-MS	Lignin	Lignin	Other	Chen et al., 2022; Yan et al., 2022
716	C9H14NO6S	Unknown	Unknown	plant biochar leachate	solid phase extraction, FT-ICR-MS	solid phase extraction, FT-ICR-MS	Amino Sugar	Amino Sugar	Other	Chen et al., 2022
717	C16H10NO3	Unknown	Unknown	plant biochar leachate	solid phase extraction, FT-ICR-MS	solid phase extraction, FT-ICR-MS	Cond Hydrocarbon	Cond Hydrocarbon	Other	Chen et al., 2022
718	C13H14NO5	Unknown	Unknown	plant biochar leachate	solid phase extraction, FT-ICR-MS	solid phase extraction, FT-ICR-MS	Lignin	Lignin	Other	Chen et al., 2022; Yan et al., 2022
719	C10H18NO5S	Unknown	Unknown	plant biochar leachate	solid phase extraction, FT-ICR-MS	solid phase extraction, FT-ICR-MS	Protein	Protein	Other	Chen et al., 2022
720	C14H18NO4	Unknown	Unknown	plant biochar leachate	solid phase extraction, FT-ICR-MS	solid phase extraction, FT-ICR-MS	Lignin	Lignin	Other	Chen et al., 2022
721	C11H5O8	Unknown	Unknown	plant biochar leachate	solid phase extraction, FT-ICR-MS	solid phase extraction, FT-ICR-MS	Other	Cond Hydrocarbon	Other	Chen et al., 2022; Yan et al., 2022
722	C8H9O8S	Unknown	Unknown	plant biochar leachate	solid phase extraction, FT-ICR-MS	solid phase extraction, FT-ICR-MS	Tannin	Tannin	Other	Chen et al., 2022
723	C10H5N2O7	Unknown	Unknown	plant biochar leachate	solid phase extraction, FT-ICR-MS	solid phase extraction, FT-ICR-MS	Cond Hydrocarbon	Cond Hydrocarbon	Other	Chen et al., 2022
724	C15H5O5	Unknown	Unknown	plant biochar leachate	solid phase extraction, FT-ICR-MS	solid phase extraction, FT-ICR-MS	Cond Hydrocarbon	Cond Hydrocarbon	Other	Chen et al., 2022; Yan et al., 2022
725	C12H9O7	Unknown	Unknown	plant biochar leachate	solid phase extraction, FT-ICR-MS	solid phase extraction, FT-ICR-MS	Cond Hydrocarbon	Cond Hydrocarbon	Other	Chen et al., 2022; Yan et al., 2022
726	C9H13O7S	Unknown	Unknown	plant biochar leachate	solid phase extraction, FT-ICR-MS	solid phase extraction, FT-ICR-MS	Other	Tannin	Other	Chen et al., 2022
727	C11H9N2O6	Unknown	Unknown	plant biochar leachate	solid phase extraction, FT-ICR-MS	solid phase extraction, FT-ICR-MS	Lignin	Lignin	Other	Chen et al., 2022; Yan et al., 2022
728	C16H9O4	Unknown	Unknown	plant biochar leachate	solid phase extraction, FT-ICR-MS	solid phase extraction, FT-ICR-MS	Cond Hydrocarbon	Cond Hydrocarbon	Other	Chen et al., 2022; Yan et al., 2022
729	C9H13O9	Unknown	Unknown	plant biochar leachate	solid phase extraction, FT-ICR-MS	solid phase extraction, FT-ICR-MS	Other	Tannin	Other	Chen et al., 2022
730	C13H13O6	Unknown	Unknown	plant biochar leachate	solid phase extraction, FT-ICR-MS	solid phase extraction, FT-ICR-MS	Lignin	Lignin	Other	Chen et al., 2022; Yan et al., 2022
731	C10H17O6S	Unknown	Unknown	plant biochar leachate	solid phase extraction, FT-ICR-MS	solid phase extraction, FT-ICR-MS	Amino Sugar	Amino Sugar	Other	Chen et al., 2022
732	C12H13N2O5	Unknown	Unknown	plant biochar leachate	solid phase extraction, FT-ICR-MS	solid phase extraction, FT-ICR-MS	Lignin	Lignin	Protein	Chen et al., 2022; Yan et al., 2022
733	C17H13O3	Unknown	Unknown	plant biochar leachate	solid phase extraction, FT-ICR-MS	solid phase extraction, FT-ICR-MS	Cond Hydrocarbon	Cond Hydrocarbon	Other	Chen et al., 2022; Yan et al., 2022
734	C10H17O8	Unknown	Unknown	plant biochar leachate	solid phase extraction, FT-ICR-MS	solid phase extraction, FT-ICR-MS	Carbohydrate	Carbohydrate	Carbohydrate	Chen et al., 2022
735	C14H17O5	Unknown	Unknown	plant biochar leachate	solid phase extraction, FT-ICR-MS	solid phase extraction, FT-ICR-MS	Lignin	Lignin	Other	Chen et al., 2022; Yan et al., 2022
736	C13H17N2O4	Unknown	Unknown	plant biochar leachate	solid phase extraction, FT-ICR-MS	solid phase extraction, FT-ICR-MS	Lignin	Lignin	Protein	Chen et al., 2022
737	C15H21O4	Unknown	Unknown	plant biochar leachate	solid phase extraction, FT-ICR-MS	solid phase extraction, FT-ICR-MS	Other	Lignin	Other	Chen et al., 2022
738	C12H25O4S	Unknown	Unknown	plant biochar leachate	solid phase extraction, FT-ICR-MS	solid phase extraction, FT-ICR-MS	Other	Protein	Other	Chen et al., 2022
739	C14H21N2O3	Unknown	Unknown	plant biochar leachate	solid phase extraction, FT-ICR-MS	solid phase extraction, FT-ICR-MS	Other	Lipid	Protein	Chen et al., 2022
740	C10H4NO8	Unknown	Unknown	plant biochar leachate	solid phase extraction, FT-ICR-MS	solid phase extraction, FT-ICR-MS	Other	Cond Hydrocarbon	Other	Chen et al., 2022
741	C11H8NO7	Unknown	Unknown	plant biochar leachate	solid phase extraction, FT-ICR-MS	solid phase extraction, FT-ICR-MS	Cond Hydrocarbon	Cond Hydrocarbon	Other	Chen et al., 2022; Yan et al., 2022
742	C15H8NO4	Unknown	Unknown	plant biochar leachate	solid phase extraction, FT-ICR-MS	solid phase extraction, FT-ICR-MS	Cond Hydrocarbon	Cond Hydrocarbon	Other	Chen et al., 2022; Yan et al., 2022
743	C12H12NO6	Unknown	Unknown	plant biochar leachate	solid phase extraction, FT-ICR-MS	solid phase extraction, FT-ICR-MS	Lignin	Lignin	Other	Chen et al., 2022; Yan et al., 2022
744	C9H16NO6S	Unknown	Unknown	plant biochar leachate	solid phase extraction, FT-ICR-MS	solid phase extraction, FT-ICR-MS	Amino Sugar	Amino Sugar	Other	Chen et al., 2022
745	C16H12NO3	Unknown	Unknown	plant biochar leachate	solid phase extraction, FT-ICR-MS	solid phase extraction, FT-ICR-MS	Cond Hydrocarbon	Cond Hydrocarbon	Other	Chen et al., 2022
746	C13H16NO5	Unknown	Unknown	plant biochar leachate	solid phase extraction, FT-ICR-MS	solid phase extraction, FT-ICR-MS	Lignin	Lignin	Other	Chen et al., 2022; Yan et al., 2022
747	C14H20NO4	Unknown	Unknown	plant biochar leachate	solid phase extraction, FT-ICR-MS	solid phase extraction, FT-ICR-MS	Lignin	Lignin	Other	Chen et al., 2022
748	C11H7O6S	Unknown	Unknown	plant biochar leachate	solid phase extraction, FT-ICR-MS	solid phase extraction, FT-ICR-MS	Cond Hydrocarbon	Cond Hydrocarbon	Other	Chen et al., 2022
749	C11H7O8	Unknown	Unknown	plant biochar leachate	solid phase extraction, FT-ICR-MS	solid phase extraction, FT-ICR-MS	Other	Cond Hydrocarbon	Other	Chen et al., 2022; Yan et al., 2022
750	C10H7N2O7	Unknown	Unknown	plant biochar leachate	solid phase extraction, FT-ICR-MS	solid phase extraction, FT-ICR-MS	Tannin;Cond Hydrocarbon	Cond Hydrocarbon	Other	Chen et al., 2022
751	C15H7O5	Unknown	Unknown	plant biochar leachate	solid phase extraction, FT-ICR-MS	solid phase extraction, FT-ICR-MS	Cond Hydrocarbon	Cond Hydrocarbon	Other	Chen et al., 2022; Yan et al., 2022
752	C12H11O7	Unknown	Unknown	plant biochar leachate	solid phase extraction, FT-ICR-MS	solid phase extraction, FT-ICR-MS	Lignin	Lignin	Other	Chen et al., 2022; Yan et al., 2022
753	C9H15O7S	Unknown	Unknown	plant biochar leachate	solid phase extraction, FT-ICR-MS	solid phase extraction, FT-ICR-MS	Carbohydrate	Carbohydrate	Other	Chen et al., 2022
754	C11H11N2O6	Unknown	Unknown	plant biochar leachate	solid phase extraction, FT-ICR-MS	solid phase extraction, FT-ICR-MS	Lignin	Lignin	Protein	Chen et al., 2022; Yan et al., 2022
755	C16H11O4	Unknown	Unknown	plant biochar leachate	solid phase extraction, FT-ICR-MS	solid phase extraction, FT-ICR-MS	Cond Hydrocarbon	Cond Hydrocarbon	Other	Chen et al., 2022; Yan et al., 2022
756	C13H15O6	Unknown	Unknown	plant biochar leachate	solid phase extraction, FT-ICR-MS	solid phase extraction, FT-ICR-MS	Lignin	Lignin	Other	Chen et al., 2022; Yan et al., 2022
757	C12H15N2O5	Unknown	Unknown	plant biochar leachate	solid phase extraction, FT-ICR-MS	solid phase extraction, FT-ICR-MS	Lignin	Lignin	Protein	Chen et al., 2022
758	C17H15O3	Unknown	Unknown	plant biochar leachate	solid phase extraction, FT-ICR-MS	solid phase extraction, FT-ICR-MS	Other	Lignin	Other	Chen et al., 2022; Yan et al., 2022
759	C14H19O5	Unknown	Unknown	plant biochar leachate	solid phase extraction, FT-ICR-MS	solid phase extraction, FT-ICR-MS	Lignin	Lignin	Other	Chen et al., 2022
760	C13H19N2O4	Unknown	Unknown	plant biochar leachate	solid phase extraction, FT-ICR-MS	solid phase extraction, FT-ICR-MS	Protein	Lignin	Protein	Chen et al., 2022
761	C15H23O4	Unknown	Unknown	plant biochar leachate	solid phase extraction, FT-ICR-MS	solid phase extraction, FT-ICR-MS	Other	Lipid	Other	Chen et al., 2022
762	C14H23N2O3	Unknown	Unknown	plant biochar leachate	solid phase extraction, FT-ICR-MS	solid phase extraction, FT-ICR-MS	Lipid	Lipid	Protein	Chen et al., 2022
763	C10H6NO8	Unknown	Unknown	plant biochar leachate	solid phase extraction, FT-ICR-MS	solid phase extraction, FT-ICR-MS	Other	Cond Hydrocarbon	Other	Chen et al., 2022; Yan et al., 2022
764	C14H6NO5	Unknown	Unknown	plant biochar leachate	solid phase extraction, FT-ICR-MS	solid phase extraction, FT-ICR-MS	Cond Hydrocarbon	Cond Hydrocarbon	Other	Chen et al., 2022; Yan et al., 2022
765	C11H10NO7	Unknown	Unknown	plant biochar leachate	solid phase extraction, FT-ICR-MS	solid phase extraction, FT-ICR-MS	Lignin	Lignin	Other	Chen et al., 2022; Yan et al., 2022
766	C15H10NO4	Unknown	Unknown	plant biochar leachate	solid phase extraction, FT-ICR-MS	solid phase extraction, FT-ICR-MS	Cond Hydrocarbon	Cond Hydrocarbon	Other	Chen et al., 2022; Yan et al., 2022
767	C12H14NO6	Unknown	Unknown	plant biochar leachate	solid phase extraction, FT-ICR-MS	solid phase extraction, FT-ICR-MS	Lignin	Lignin	Other	Chen et al., 2022; Yan et al., 2022
768	C16H14NO3	Unknown	Unknown	plant biochar leachate	solid phase extraction, FT-ICR-MS	solid phase extraction, FT-ICR-MS	Other	Lignin	Other	Chen et al., 2022; Yan et al., 2022
769	C13H18NO5	Unknown	Unknown	plant biochar leachate	solid phase extraction, FT-ICR-MS	solid phase extraction, FT-ICR-MS	Lignin	Lignin	Other	Chen et al., 2022
770	C14H22NO4	Unknown	Unknown	plant biochar leachate	solid phase extraction, FT-ICR-MS	solid phase extraction, FT-ICR-MS	Lipid	Lipid	Other	Chen et al., 2022
771	C10H5O7S	Unknown	Unknown	plant biochar leachate	solid phase extraction, FT-ICR-MS	solid phase extraction, FT-ICR-MS	Cond Hydrocarbon	Cond Hydrocarbon	Other	Chen et al., 2022
772	C10H5O9	Unknown	Unknown	plant biochar leachate	solid phase extraction, FT-ICR-MS	solid phase extraction, FT-ICR-MS	Other	Cond Hydrocarbon	Other	Chen et al., 2022; Yan et al., 2022
773	C14H5O6	Unknown	Unknown	plant biochar leachate	solid phase extraction, FT-ICR-MS	solid phase extraction, FT-ICR-MS	Cond Hydrocarbon	Cond Hydrocarbon	Other	Chen et al., 2022; Yan et al., 2022
774	C11H9O6S	Unknown	Unknown	plant biochar leachate	solid phase extraction, FT-ICR-MS	solid phase extraction, FT-ICR-MS	Lignin	Lignin	Other	Chen et al., 2022
775	C11H9O8	Unknown	Unknown	plant biochar leachate	solid phase extraction, FT-ICR-MS	solid phase extraction, FT-ICR-MS	Tannin	Tannin	Other	Chen et al., 2022; Yan et al., 2022
776	C8H13O8S	Unknown	Unknown	plant biochar leachate	solid phase extraction, FT-ICR-MS	solid phase extraction, FT-ICR-MS	Carbohydrate	Carbohydrate	Other	Chen et al., 2022
777	C15H9O5	Unknown	Unknown	plant biochar leachate	solid phase extraction, FT-ICR-MS	solid phase extraction, FT-ICR-MS	Cond Hydrocarbon	Cond Hydrocarbon	Other	Chen et al., 2022; Yan et al., 2022
778	C14H9N2O4	Unknown	Unknown	plant biochar leachate	solid phase extraction, FT-ICR-MS	solid phase extraction, FT-ICR-MS	Cond Hydrocarbon	Cond Hydrocarbon	Other	Chen et al., 2022
779	C12H13O7	Unknown	Unknown	plant biochar leachate	solid phase extraction, FT-ICR-MS	solid phase extraction, FT-ICR-MS	Lignin	Lignin	Other	Chen et al., 2022; Yan et al., 2022
780	C11H13N2O6	Unknown	Unknown	plant biochar leachate	solid phase extraction, FT-ICR-MS	solid phase extraction, FT-ICR-MS	Lignin	Lignin	Protein	Chen et al., 2022
781	C16H13O4	Unknown	Unknown	plant biochar leachate	solid phase extraction, FT-ICR-MS	solid phase extraction, FT-ICR-MS	Other	Lignin	Other	Chen et al., 2022; Yan et al., 2022
782	C15H13N2O3	Unknown	Unknown	plant biochar leachate	solid phase extraction, FT-ICR-MS	solid phase extraction, FT-ICR-MS	Other	Lignin	Other	Chen et al., 2022
783	C13H17O6	Unknown	Unknown	plant biochar leachate	solid phase extraction, FT-ICR-MS	solid phase extraction, FT-ICR-MS	Lignin	Lignin	Other	Chen et al., 2022; Yan et al., 2022
784	C12H17N2O5	Unknown	Unknown	plant biochar leachate	solid phase extraction, FT-ICR-MS	solid phase extraction, FT-ICR-MS	Lignin	Lignin	Protein	Chen et al., 2022
785	C17H17O3	Unknown	Unknown	plant biochar leachate	solid phase extraction, FT-ICR-MS	solid phase extraction, FT-ICR-MS	Other	Lignin	Other	Chen et al., 2022; Yan et al., 2022
786	C14H21O5	Unknown	Unknown	plant biochar leachate	solid phase extraction, FT-ICR-MS	solid phase extraction, FT-ICR-MS	Protein	Protein	Other	Chen et al., 2022; Yan et al., 2022
787	C13H21N2O4	Unknown	Unknown	plant biochar leachate	solid phase extraction, FT-ICR-MS	solid phase extraction, FT-ICR-MS	Protein	Protein	Protein	Chen et al., 2022
788	C15H25O4	Unknown	Unknown	plant biochar leachate	solid phase extraction, FT-ICR-MS	solid phase extraction, FT-ICR-MS	Lipid	Lipid	Other	Chen et al., 2022; Yan et al., 2022
789	C9H4NO9	Unknown	Unknown	plant biochar leachate	solid phase extraction, FT-ICR-MS	solid phase extraction, FT-ICR-MS	Other	Other	Other	Chen et al., 2022
790	C10H8NO8	Unknown	Unknown	plant biochar leachate	solid phase extraction, FT-ICR-MS	solid phase extraction, FT-ICR-MS	Tannin	Tannin	Other	Chen et al., 2022
791	C14H8NO5	Unknown	Unknown	plant biochar leachate	solid phase extraction, FT-ICR-MS	solid phase extraction, FT-ICR-MS	Cond Hydrocarbon	Cond Hydrocarbon	Other	Chen et al., 2022; Yan et al., 2022
792	C11H12NO7	Unknown	Unknown	plant biochar leachate	solid phase extraction, FT-ICR-MS	solid phase extraction, FT-ICR-MS	Lignin	Lignin	Other	Chen et al., 2022; Yan et al., 2022
793	C15H12NO4	Unknown	Unknown	plant biochar leachate	solid phase extraction, FT-ICR-MS	solid phase extraction, FT-ICR-MS	Cond Hydrocarbon	Lignin	Other	Chen et al., 2022; Yan et al., 2022
794	C12H16NO6	Unknown	Unknown	plant biochar leachate	solid phase extraction, FT-ICR-MS	solid phase extraction, FT-ICR-MS	Lignin	Lignin	Other	Chen et al., 2022
795	C11H16N3O5	Unknown	Unknown	plant biochar leachate	solid phase extraction, FT-ICR-MS	solid phase extraction, FT-ICR-MS	Protein	Lignin	Protein	Chen et al., 2022
796	C16H16NO3	Unknown	Unknown	plant biochar leachate	solid phase extraction, FT-ICR-MS	solid phase extraction, FT-ICR-MS	Other	Lignin	Other	Chen et al., 2022; Yan et al., 2022
797	C13H20NO5	Unknown	Unknown	plant biochar leachate	solid phase extraction, FT-ICR-MS	solid phase extraction, FT-ICR-MS	Protein	Protein	Other	Chen et al., 2022
798	C16H32NO2	Unknown	Unknown	plant biochar leachate	solid phase extraction, FT-ICR-MS	solid phase extraction, FT-ICR-MS	Lipid	Lipid;Unsat Hydrocarbon	Other	Chen et al., 2022
799	C10H7O7S	Unknown	Unknown	plant biochar leachate	solid phase extraction, FT-ICR-MS	solid phase extraction, FT-ICR-MS	Tannin;Cond Hydrocarbon	Cond Hydrocarbon	Other	Chen et al., 2022
800	C10H7O9	Unknown	Unknown	plant biochar leachate	solid phase extraction, FT-ICR-MS	solid phase extraction, FT-ICR-MS	Tannin	Cond Hydrocarbon	Other	Chen et al., 2022
801	C14H7O6	Unknown	Unknown	plant biochar leachate	solid phase extraction, FT-ICR-MS	solid phase extraction, FT-ICR-MS	Cond Hydrocarbon	Cond Hydrocarbon	Other	Chen et al., 2022; Yan et al., 2022
802	C11H11O6S	Unknown	Unknown	plant biochar leachate	solid phase extraction, FT-ICR-MS	solid phase extraction, FT-ICR-MS	Lignin	Lignin	Other	Chen et al., 2022
803	C13H7N2O5	Unknown	Unknown	plant biochar leachate	solid phase extraction, FT-ICR-MS	solid phase extraction, FT-ICR-MS	Cond Hydrocarbon	Cond Hydrocarbon	Other	Chen et al., 2022; Yan et al., 2022
804	C11H11O8	Unknown	Unknown	plant biochar leachate	solid phase extraction, FT-ICR-MS	solid phase extraction, FT-ICR-MS	Tannin	Tannin	Other	Chen et al., 2022; Yan et al., 2022
805	C10H11N2O7	Unknown	Unknown	plant biochar leachate	solid phase extraction, FT-ICR-MS	solid phase extraction, FT-ICR-MS	Tannin	Tannin	Other	Chen et al., 2022
806	C15H11O5	Unknown	Unknown	plant biochar leachate	solid phase extraction, FT-ICR-MS	solid phase extraction, FT-ICR-MS	Cond Hydrocarbon	Cond Hydrocarbon	Other	Chen et al., 2022; Yan et al., 2022
807	C14H11N2O4	Unknown	Unknown	plant biochar leachate	solid phase extraction, FT-ICR-MS	solid phase extraction, FT-ICR-MS	Cond Hydrocarbon	Cond Hydrocarbon	Other	Chen et al., 2022; Yan et al., 2022
808	C12H15O7	Unknown	Unknown	plant biochar leachate	solid phase extraction, FT-ICR-MS	solid phase extraction, FT-ICR-MS	Lignin	Lignin	Other	Chen et al., 2022; Yan et al., 2022
809	C11H15N2O6	Unknown	Unknown	plant biochar leachate	solid phase extraction, FT-ICR-MS	solid phase extraction, FT-ICR-MS	Lignin;Amino Sugar	Lignin	Protein	Chen et al., 2022
810	C16H15O4	Unknown	Unknown	plant biochar leachate	solid phase extraction, FT-ICR-MS	solid phase extraction, FT-ICR-MS	Other	Lignin	Other	Chen et al., 2022; Yan et al., 2022
811	C15H15N2O3	Unknown	Unknown	plant biochar leachate	solid phase extraction, FT-ICR-MS	solid phase extraction, FT-ICR-MS	Other	Lignin	Protein	Chen et al., 2022
812	C13H19O6	Unknown	Unknown	plant biochar leachate	solid phase extraction, FT-ICR-MS	solid phase extraction, FT-ICR-MS	Protein	Lignin	Other	Chen et al., 2022; Yan et al., 2022
813	C12H19N2O5	Unknown	Unknown	plant biochar leachate	solid phase extraction, FT-ICR-MS	solid phase extraction, FT-ICR-MS	Protein	Protein	Protein	Chen et al., 2022
814	C17H19O3	Unknown	Unknown	plant biochar leachate	solid phase extraction, FT-ICR-MS	solid phase extraction, FT-ICR-MS	Other	Lignin	Other	Chen et al., 2022
815	C14H23O5	Unknown	Unknown	plant biochar leachate	solid phase extraction, FT-ICR-MS	solid phase extraction, FT-ICR-MS	Protein	Protein	Other	Chen et al., 2022; Yan et al., 2022
816	C13H23N2O4	Unknown	Unknown	plant biochar leachate	solid phase extraction, FT-ICR-MS	solid phase extraction, FT-ICR-MS	Protein	Protein	Protein	Chen et al., 2022
817	C15H27O4	Unknown	Unknown	plant biochar leachate	solid phase extraction, FT-ICR-MS	solid phase extraction, FT-ICR-MS	Lipid	Lipid	Other	Chen et al., 2022
818	C13H6NO6	Unknown	Unknown	plant biochar leachate	solid phase extraction, FT-ICR-MS	solid phase extraction, FT-ICR-MS	Cond Hydrocarbon	Cond Hydrocarbon	Other	Chen et al., 2022; Yan et al., 2022
819	C12H6N3O5	Unknown	Unknown	plant biochar leachate	solid phase extraction, FT-ICR-MS	solid phase extraction, FT-ICR-MS	Cond Hydrocarbon	Cond Hydrocarbon	Other	Chen et al., 2022
820	C14H10NO3S	Unknown	Unknown	plant biochar leachate	solid phase extraction, FT-ICR-MS	solid phase extraction, FT-ICR-MS	Cond Hydrocarbon	Cond Hydrocarbon	Other	Chen et al., 2022
821	C10H10NO8	Unknown	Unknown	plant biochar leachate	solid phase extraction, FT-ICR-MS	solid phase extraction, FT-ICR-MS	Tannin	Tannin	Other	Chen et al., 2022
822	C13H10N3O2S	Unknown	Unknown	plant biochar leachate	solid phase extraction, FT-ICR-MS	solid phase extraction, FT-ICR-MS	Cond Hydrocarbon	Cond Hydrocarbon	Other	Chen et al., 2022
823	C14H10NO5	Unknown	Unknown	plant biochar leachate	solid phase extraction, FT-ICR-MS	solid phase extraction, FT-ICR-MS	Cond Hydrocarbon	Cond Hydrocarbon	Other	Chen et al., 2022; Yan et al., 2022
824	C11H14NO7	Unknown	Unknown	plant biochar leachate	solid phase extraction, FT-ICR-MS	solid phase extraction, FT-ICR-MS	Lignin	Lignin	Other	Chen et al., 2022; Yan et al., 2022
825	C15H14NO4	Unknown	Unknown	plant biochar leachate	solid phase extraction, FT-ICR-MS	solid phase extraction, FT-ICR-MS	Other	Lignin	Other	Chen et al., 2022; Yan et al., 2022
826	C12H18NO6	Unknown	Unknown	plant biochar leachate	solid phase extraction, FT-ICR-MS	solid phase extraction, FT-ICR-MS	Protein	Protein	Other	Chen et al., 2022
827	C16H18NO3	Unknown	Unknown	plant biochar leachate	solid phase extraction, FT-ICR-MS	solid phase extraction, FT-ICR-MS	Other	Lignin	Other	Chen et al., 2022
828	C13H22NO5	Unknown	Unknown	plant biochar leachate	solid phase extraction, FT-ICR-MS	solid phase extraction, FT-ICR-MS	Protein	Protein	Other	Chen et al., 2022
829	C14H26NO4	Unknown	Unknown	plant biochar leachate	solid phase extraction, FT-ICR-MS	solid phase extraction, FT-ICR-MS	Lipid	Lipid	Other	Chen et al., 2022
830	C9H5O8S	Unknown	Unknown	plant biochar leachate	solid phase extraction, FT-ICR-MS	solid phase extraction, FT-ICR-MS	Other	Cond Hydrocarbon	Other	Chen et al., 2022
831	C9H5O10	Unknown	Unknown	plant biochar leachate	solid phase extraction, FT-ICR-MS	solid phase extraction, FT-ICR-MS	Other	Other	Other	Chen et al., 2022
832	C13H5O7	Unknown	Unknown	plant biochar leachate	solid phase extraction, FT-ICR-MS	solid phase extraction, FT-ICR-MS	Cond Hydrocarbon	Cond Hydrocarbon	Other	Chen et al., 2022; Yan et al., 2022
833	C10H9O7S	Unknown	Unknown	plant biochar leachate	solid phase extraction, FT-ICR-MS	solid phase extraction, FT-ICR-MS	Tannin	Tannin	Other	Chen et al., 2022
834	C12H5N2O6	Unknown	Unknown	plant biochar leachate	solid phase extraction, FT-ICR-MS	solid phase extraction, FT-ICR-MS	Cond Hydrocarbon	Cond Hydrocarbon	Other	Chen et al., 2022; Yan et al., 2022
835	C10H9O9	Unknown	Unknown	plant biochar leachate	solid phase extraction, FT-ICR-MS	solid phase extraction, FT-ICR-MS	Tannin	Tannin	Other	Chen et al., 2022
836	C14H9O6	Unknown	Unknown	plant biochar leachate	solid phase extraction, FT-ICR-MS	solid phase extraction, FT-ICR-MS	Cond Hydrocarbon	Cond Hydrocarbon	Other	Chen et al., 2022; Yan et al., 2022
837	C11H13O6S	Unknown	Unknown	plant biochar leachate	solid phase extraction, FT-ICR-MS	solid phase extraction, FT-ICR-MS	Lignin	Lignin	Other	Chen et al., 2022
838	C13H9N2O5	Unknown	Unknown	plant biochar leachate	solid phase extraction, FT-ICR-MS	solid phase extraction, FT-ICR-MS	Cond Hydrocarbon	Cond Hydrocarbon	Other	Chen et al., 2022; Yan et al., 2022
839	C11H13O8	Unknown	Unknown	plant biochar leachate	solid phase extraction, FT-ICR-MS	solid phase extraction, FT-ICR-MS	Tannin	Tannin	Other	Chen et al., 2022; Goranov et al., 2020; Yan et al., 2022
840	C10H13N2O7	Unknown	Unknown	plant biochar leachate	solid phase extraction, FT-ICR-MS	solid phase extraction, FT-ICR-MS	Tannin	Tannin	Other	Chen et al., 2022
841	C15H13O5	Unknown	Unknown	plant biochar leachate	solid phase extraction, FT-ICR-MS	solid phase extraction, FT-ICR-MS	Lignin	Lignin	Other	Chen et al., 2022; Yan et al., 2022
842	C14H13N2O4	Unknown	Unknown	plant biochar leachate	solid phase extraction, FT-ICR-MS	solid phase extraction, FT-ICR-MS	Lignin	Lignin	Protein	Chen et al., 2022; Yan et al., 2022
843	C12H17O7	Unknown	Unknown	plant biochar leachate	solid phase extraction, FT-ICR-MS	solid phase extraction, FT-ICR-MS	Lignin;Amino Sugar	Lignin	Other	Chen et al., 2022
844	C11H17N2O6	Unknown	Unknown	plant biochar leachate	solid phase extraction, FT-ICR-MS	solid phase extraction, FT-ICR-MS	Protein;Amino Sugar	Protein	Protein	Chen et al., 2022
845	C16H17O4	Unknown	Unknown	plant biochar leachate	solid phase extraction, FT-ICR-MS	solid phase extraction, FT-ICR-MS	Other	Lignin	Other	Chen et al., 2022; Yan et al., 2022
846	C13H21O6	Unknown	Unknown	plant biochar leachate	solid phase extraction, FT-ICR-MS	solid phase extraction, FT-ICR-MS	Protein	Protein	Other	Chen et al., 2022; Yan et al., 2022
847	C12H21N2O5	Unknown	Unknown	plant biochar leachate	solid phase extraction, FT-ICR-MS	solid phase extraction, FT-ICR-MS	Protein	Protein	Protein	Chen et al., 2022
848	C17H21O3	Unknown	Unknown	plant biochar leachate	solid phase extraction, FT-ICR-MS	solid phase extraction, FT-ICR-MS	Other	Lignin	Other	Chen et al., 2022
849	C17H25N2O	Unknown	Unknown	plant biochar leachate	solid phase extraction, FT-ICR-MS	solid phase extraction, FT-ICR-MS	Unsat Hydrocarbon	Unsat Hydrocarbon	Other	Chen et al., 2022
850	C12H4NO7	Unknown	Unknown	plant biochar leachate	solid phase extraction, FT-ICR-MS	solid phase extraction, FT-ICR-MS	Cond Hydrocarbon	Cond Hydrocarbon	Other	Chen et al., 2022
851	C13H8NO6	Unknown	Unknown	plant biochar leachate	solid phase extraction, FT-ICR-MS	solid phase extraction, FT-ICR-MS	Cond Hydrocarbon	Cond Hydrocarbon	Other	Chen et al., 2022; Yan et al., 2022
852	C10H12NO8	Unknown	Unknown	plant biochar leachate	solid phase extraction, FT-ICR-MS	solid phase extraction, FT-ICR-MS	Tannin	Tannin	Other	Chen et al., 2022
853	C14H12NO5	Unknown	Unknown	plant biochar leachate	solid phase extraction, FT-ICR-MS	solid phase extraction, FT-ICR-MS	Lignin	Lignin	Other	Chen et al., 2022; Yan et al., 2022
854	C11H16NO7	Unknown	Unknown	plant biochar leachate	solid phase extraction, FT-ICR-MS	solid phase extraction, FT-ICR-MS	Amino Sugar	Lignin	Other	Chen et al., 2022
855	C15H16NO4	Unknown	Unknown	plant biochar leachate	solid phase extraction, FT-ICR-MS	solid phase extraction, FT-ICR-MS	Other	Lignin	Other	Chen et al., 2022; Yan et al., 2022
856	C12H20NO6	Unknown	Unknown	plant biochar leachate	solid phase extraction, FT-ICR-MS	solid phase extraction, FT-ICR-MS	Protein	Protein	Other	Chen et al., 2022
857	C16H20NO3	Unknown	Unknown	plant biochar leachate	solid phase extraction, FT-ICR-MS	solid phase extraction, FT-ICR-MS	Other	Lignin	Other	Chen et al., 2022
858	C13H24NO5	Unknown	Unknown	plant biochar leachate	solid phase extraction, FT-ICR-MS	solid phase extraction, FT-ICR-MS	Protein	Protein	Other	Chen et al., 2022
859	C16H24N3O	Unknown	Unknown	plant biochar leachate	solid phase extraction, FT-ICR-MS	solid phase extraction, FT-ICR-MS	Unsat Hydrocarbon	Lipid;Unsat Hydrocarbon	Other	Chen et al., 2022
860	C12H3O8	Unknown	Unknown	plant biochar leachate	solid phase extraction, FT-ICR-MS	solid phase extraction, FT-ICR-MS	Other	Cond Hydrocarbon	Other	Chen et al., 2022
861	C9H7O8S	Unknown	Unknown	plant biochar leachate	solid phase extraction, FT-ICR-MS	solid phase extraction, FT-ICR-MS	Tannin	Cond Hydrocarbon	Other	Chen et al., 2022
862	C13H7O7	Unknown	Unknown	plant biochar leachate	solid phase extraction, FT-ICR-MS	solid phase extraction, FT-ICR-MS	Cond Hydrocarbon	Cond Hydrocarbon	Other	Chen et al., 2022; Yan et al., 2022
863	C10H11O7S	Unknown	Unknown	plant biochar leachate	solid phase extraction, FT-ICR-MS	solid phase extraction, FT-ICR-MS	Tannin	Tannin	Other	Chen et al., 2022
864	C12H7N2O6	Unknown	Unknown	plant biochar leachate	solid phase extraction, FT-ICR-MS	solid phase extraction, FT-ICR-MS	Cond Hydrocarbon	Cond Hydrocarbon	Other	Chen et al., 2022; Yan et al., 2022
865	C10H11O9	Unknown	Unknown	plant biochar leachate	solid phase extraction, FT-ICR-MS	solid phase extraction, FT-ICR-MS	Tannin	Tannin	Other	Chen et al., 2022; Yan et al., 2022
866	C9H11N2O8	Unknown	Unknown	plant biochar leachate	solid phase extraction, FT-ICR-MS	solid phase extraction, FT-ICR-MS	Tannin	Tannin	Protein	Chen et al., 2022
867	C14H11O6	Unknown	Unknown	plant biochar leachate	solid phase extraction, FT-ICR-MS	solid phase extraction, FT-ICR-MS	Cond Hydrocarbon	Cond Hydrocarbon	Other	Chen et al., 2022; Yan et al., 2022
868	C11H15O6S	Unknown	Unknown	plant biochar leachate	solid phase extraction, FT-ICR-MS	solid phase extraction, FT-ICR-MS	Lignin;Amino Sugar	Lignin	Other	Chen et al., 2022
869	C13H11N2O5	Unknown	Unknown	plant biochar leachate	solid phase extraction, FT-ICR-MS	solid phase extraction, FT-ICR-MS	Lignin	Lignin	Other	Chen et al., 2022; Yan et al., 2022
870	C18H11O3	Unknown	Unknown	plant biochar leachate	solid phase extraction, FT-ICR-MS	solid phase extraction, FT-ICR-MS	Cond Hydrocarbon	Cond Hydrocarbon	Other	Chen et al., 2022
871	C11H15O8	Unknown	Unknown	plant biochar leachate	solid phase extraction, FT-ICR-MS	solid phase extraction, FT-ICR-MS	Other	Tannin	Other	Chen et al., 2022
872	C15H15O5	Unknown	Unknown	plant biochar leachate	solid phase extraction, FT-ICR-MS	solid phase extraction, FT-ICR-MS	Lignin	Lignin	Other	Chen et al., 2022; Yan et al., 2022
873	C14H15N2O4	Unknown	Unknown	plant biochar leachate	solid phase extraction, FT-ICR-MS	solid phase extraction, FT-ICR-MS	Lignin	Lignin	Protein	Chen et al., 2022; Yan et al., 2022
874	C12H19O7	Unknown	Unknown	plant biochar leachate	solid phase extraction, FT-ICR-MS	solid phase extraction, FT-ICR-MS	Amino Sugar	Amino Sugar	Other	Chen et al., 2022
875	C16H19O4	Unknown	Unknown	plant biochar leachate	solid phase extraction, FT-ICR-MS	solid phase extraction, FT-ICR-MS	Other	Lignin	Other	Chen et al., 2022
876	C15H19N2O3	Unknown	Unknown	plant biochar leachate	solid phase extraction, FT-ICR-MS	solid phase extraction, FT-ICR-MS	Other	Lignin	Protein	Chen et al., 2022
877	C12H6NO7	Unknown	Unknown	plant biochar leachate	solid phase extraction, FT-ICR-MS	solid phase extraction, FT-ICR-MS	Cond Hydrocarbon	Cond Hydrocarbon	Other	Chen et al., 2022; Yan et al., 2022
878	C9H10NO9	Unknown	Unknown	plant biochar leachate	solid phase extraction, FT-ICR-MS	solid phase extraction, FT-ICR-MS	Tannin	Tannin	Other	Chen et al., 2022
879	C13H10NO6	Unknown	Unknown	plant biochar leachate	solid phase extraction, FT-ICR-MS	solid phase extraction, FT-ICR-MS	Cond Hydrocarbon	Cond Hydrocarbon	Other	Chen et al., 2022; Yan et al., 2022
880	C17H10NO3	Unknown	Unknown	plant biochar leachate	solid phase extraction, FT-ICR-MS	solid phase extraction, FT-ICR-MS	Cond Hydrocarbon	Cond Hydrocarbon	Other	Chen et al., 2022
881	C14H14NO3S	Unknown	Unknown	plant biochar leachate	solid phase extraction, FT-ICR-MS	solid phase extraction, FT-ICR-MS	Other	Lignin	Other	Chen et al., 2022
882	C10H14NO8	Unknown	Unknown	plant biochar leachate	solid phase extraction, FT-ICR-MS	solid phase extraction, FT-ICR-MS	Other	Tannin	Other	Chen et al., 2022
883	C14H14NO5	Unknown	Unknown	plant biochar leachate	solid phase extraction, FT-ICR-MS	solid phase extraction, FT-ICR-MS	Lignin	Lignin	Other	Chen et al., 2022; Yan et al., 2022
884	C13H14N3O4	Unknown	Unknown	plant biochar leachate	solid phase extraction, FT-ICR-MS	solid phase extraction, FT-ICR-MS	Lignin	Lignin	Protein	Chen et al., 2022
885	C11H18NO7	Unknown	Unknown	plant biochar leachate	solid phase extraction, FT-ICR-MS	solid phase extraction, FT-ICR-MS	Amino Sugar	Amino Sugar	Other	Chen et al., 2022
886	C15H18NO4	Unknown	Unknown	plant biochar leachate	solid phase extraction, FT-ICR-MS	solid phase extraction, FT-ICR-MS	Other	Lignin	Other	Chen et al., 2022
887	C12H22NO4S	Unknown	Unknown	plant biochar leachate	solid phase extraction, FT-ICR-MS	solid phase extraction, FT-ICR-MS	Protein	Protein	Other	Chen et al., 2022
888	C12H5O8	Unknown	Unknown	plant biochar leachate	solid phase extraction, FT-ICR-MS	solid phase extraction, FT-ICR-MS	Cond Hydrocarbon	Cond Hydrocarbon	Other	Chen et al., 2022; Yan et al., 2022
889	C9H9O8S	Unknown	Unknown	plant biochar leachate	solid phase extraction, FT-ICR-MS	solid phase extraction, FT-ICR-MS	Tannin	Tannin	Other	Chen et al., 2022
890	C11H5N2O7	Unknown	Unknown	plant biochar leachate	solid phase extraction, FT-ICR-MS	solid phase extraction, FT-ICR-MS	Cond Hydrocarbon	Cond Hydrocarbon	Other	Chen et al., 2022; Yan et al., 2022
891	C9H9O10	Unknown	Unknown	plant biochar leachate	solid phase extraction, FT-ICR-MS	solid phase extraction, FT-ICR-MS	Other	Other	Other	Chen et al., 2022
892	C13H9O7	Unknown	Unknown	plant biochar leachate	solid phase extraction, FT-ICR-MS	solid phase extraction, FT-ICR-MS	Cond Hydrocarbon	Cond Hydrocarbon	Other	Chen et al., 2022; Yan et al., 2022
893	C10H13O7S	Unknown	Unknown	plant biochar leachate	solid phase extraction, FT-ICR-MS	solid phase extraction, FT-ICR-MS	Tannin	Tannin	Other	Chen et al., 2022
894	C12H9N2O6	Unknown	Unknown	plant biochar leachate	solid phase extraction, FT-ICR-MS	solid phase extraction, FT-ICR-MS	Cond Hydrocarbon	Cond Hydrocarbon	Other	Chen et al., 2022; Yan et al., 2022
895	C17H9O4	Unknown	Unknown	plant biochar leachate	solid phase extraction, FT-ICR-MS	solid phase extraction, FT-ICR-MS	Cond Hydrocarbon	Cond Hydrocarbon	Other	Chen et al., 2022; Yan et al., 2022
896	C10H13O9	Unknown	Unknown	plant biochar leachate	solid phase extraction, FT-ICR-MS	solid phase extraction, FT-ICR-MS	Tannin	Tannin	Other	Chen et al., 2022
897	C14H13O6	Unknown	Unknown	plant biochar leachate	solid phase extraction, FT-ICR-MS	solid phase extraction, FT-ICR-MS	Lignin	Lignin	Other	Chen et al., 2022; Yan et al., 2022
898	C13H13N2O5	Unknown	Unknown	plant biochar leachate	solid phase extraction, FT-ICR-MS	solid phase extraction, FT-ICR-MS	Lignin	Lignin	Protein	Chen et al., 2022; Yan et al., 2022
899	C18H13O3	Unknown	Unknown	plant biochar leachate	solid phase extraction, FT-ICR-MS	solid phase extraction, FT-ICR-MS	Cond Hydrocarbon	Cond Hydrocarbon	Other	Chen et al., 2022; Yan et al., 2022
900	C11H17O8	Unknown	Unknown	plant biochar leachate	solid phase extraction, FT-ICR-MS	solid phase extraction, FT-ICR-MS	Carbohydrate	Carbohydrate	Other	Chen et al., 2022
901	C15H17O5	Unknown	Unknown	plant biochar leachate	solid phase extraction, FT-ICR-MS	solid phase extraction, FT-ICR-MS	Lignin	Lignin	Other	Chen et al., 2022; Yan et al., 2022
902	C14H17N2O4	Unknown	Unknown	plant biochar leachate	solid phase extraction, FT-ICR-MS	solid phase extraction, FT-ICR-MS	Lignin	Lignin	Protein	Chen et al., 2022; Yan et al., 2022
903	C16H21O4	Unknown	Unknown	plant biochar leachate	solid phase extraction, FT-ICR-MS	solid phase extraction, FT-ICR-MS	Other	Lignin	Other	Chen et al., 2022; Yan et al., 2022
904	C15H21N2O3	Unknown	Unknown	plant biochar leachate	solid phase extraction, FT-ICR-MS	solid phase extraction, FT-ICR-MS	Other	Lignin	Protein	Chen et al., 2022
905	C12H25N2O3S	Unknown	Unknown	plant biochar leachate	solid phase extraction, FT-ICR-MS	solid phase extraction, FT-ICR-MS	Lipid	Lipid	Protein	Chen et al., 2022
906	C11H4NO8	Unknown	Unknown	plant biochar leachate	solid phase extraction, FT-ICR-MS	solid phase extraction, FT-ICR-MS	Other	Cond Hydrocarbon	Other	Chen et al., 2022
907	C8H8NO8S	Unknown	Unknown	plant biochar leachate	solid phase extraction, FT-ICR-MS	solid phase extraction, FT-ICR-MS	Tannin	Tannin	Other	Chen et al., 2022
908	C12H8NO7	Unknown	Unknown	plant biochar leachate	solid phase extraction, FT-ICR-MS	solid phase extraction, FT-ICR-MS	Cond Hydrocarbon	Cond Hydrocarbon	Other	Chen et al., 2022; Yan et al., 2022
909	C16H8NO4	Unknown	Unknown	plant biochar leachate	solid phase extraction, FT-ICR-MS	solid phase extraction, FT-ICR-MS	Cond Hydrocarbon	Cond Hydrocarbon	Other	Chen et al., 2022; Yan et al., 2022
910	C13H12NO6	Unknown	Unknown	plant biochar leachate	solid phase extraction, FT-ICR-MS	solid phase extraction, FT-ICR-MS	Lignin	Lignin	Other	Chen et al., 2022; Yan et al., 2022
911	C12H12N3O5	Unknown	Unknown	plant biochar leachate	solid phase extraction, FT-ICR-MS	solid phase extraction, FT-ICR-MS	Lignin	Lignin	Protein	Chen et al., 2022
912	C17H12NO3	Unknown	Unknown	plant biochar leachate	solid phase extraction, FT-ICR-MS	solid phase extraction, FT-ICR-MS	Cond Hydrocarbon	Cond Hydrocarbon	Other	Chen et al., 2022
913	C14H16NO5	Unknown	Unknown	plant biochar leachate	solid phase extraction, FT-ICR-MS	solid phase extraction, FT-ICR-MS	Lignin	Lignin	Other	Chen et al., 2022; Yan et al., 2022
914	C11H20NO5S	Unknown	Unknown	plant biochar leachate	solid phase extraction, FT-ICR-MS	solid phase extraction, FT-ICR-MS	Protein	Protein	Other	Chen et al., 2022
915	C13H16N3O4	Unknown	Unknown	plant biochar leachate	solid phase extraction, FT-ICR-MS	solid phase extraction, FT-ICR-MS	Lignin	Lignin	Protein	Chen et al., 2022
916	C15H20NO4	Unknown	Unknown	plant biochar leachate	solid phase extraction, FT-ICR-MS	solid phase extraction, FT-ICR-MS	Other	Lignin	Other	Chen et al., 2022
917	C16H24NO3	Unknown	Unknown	plant biochar leachate	solid phase extraction, FT-ICR-MS	solid phase extraction, FT-ICR-MS	Other	Lipid	Other	Chen et al., 2022
918	C11H3O9	Unknown	Unknown	plant biochar leachate	solid phase extraction, FT-ICR-MS	solid phase extraction, FT-ICR-MS	Other	Cond Hydrocarbon	Other	Chen et al., 2022
919	C12H7O8	Unknown	Unknown	plant biochar leachate	solid phase extraction, FT-ICR-MS	solid phase extraction, FT-ICR-MS	Cond Hydrocarbon	Cond Hydrocarbon	Other	Chen et al., 2022; Yan et al., 2022
920	C9H11O8S	Unknown	Unknown	plant biochar leachate	solid phase extraction, FT-ICR-MS	solid phase extraction, FT-ICR-MS	Tannin	Tannin	Other	Chen et al., 2022
921	C11H7N2O7	Unknown	Unknown	plant biochar leachate	solid phase extraction, FT-ICR-MS	solid phase extraction, FT-ICR-MS	Cond Hydrocarbon	Cond Hydrocarbon	Other	Chen et al., 2022
922	C16H7O5	Unknown	Unknown	plant biochar leachate	solid phase extraction, FT-ICR-MS	solid phase extraction, FT-ICR-MS	Cond Hydrocarbon	Cond Hydrocarbon	Other	Chen et al., 2022
923	C9H11O10	Unknown	Unknown	plant biochar leachate	solid phase extraction, FT-ICR-MS	solid phase extraction, FT-ICR-MS	Other	Other	Other	Chen et al., 2022
924	C13H11O7	Unknown	Unknown	plant biochar leachate	solid phase extraction, FT-ICR-MS	solid phase extraction, FT-ICR-MS	Lignin	Lignin	Other	Chen et al., 2022; Yan et al., 2022
925	C12H11N2O6	Unknown	Unknown	plant biochar leachate	solid phase extraction, FT-ICR-MS	solid phase extraction, FT-ICR-MS	Lignin	Lignin	Protein	Chen et al., 2022; Yan et al., 2022
926	C17H11O4	Unknown	Unknown	plant biochar leachate	solid phase extraction, FT-ICR-MS	solid phase extraction, FT-ICR-MS	Cond Hydrocarbon	Cond Hydrocarbon	Other	Chen et al., 2022; Yan et al., 2022
927	C10H15O9	Unknown	Unknown	plant biochar leachate	solid phase extraction, FT-ICR-MS	solid phase extraction, FT-ICR-MS	Carbohydrate	Carbohydrate	Other	Chen et al., 2022
928	C9H15N2O8	Unknown	Unknown	plant biochar leachate	solid phase extraction, FT-ICR-MS	solid phase extraction, FT-ICR-MS	Carbohydrate	Carbohydrate	Protein	Chen et al., 2022
929	C14H15O6	Unknown	Unknown	plant biochar leachate	solid phase extraction, FT-ICR-MS	solid phase extraction, FT-ICR-MS	Lignin	Lignin	Other	Chen et al., 2022; Yan et al., 2022
930	C13H15N2O5	Unknown	Unknown	plant biochar leachate	solid phase extraction, FT-ICR-MS	solid phase extraction, FT-ICR-MS	Lignin	Lignin	Protein	Chen et al., 2022; Yan et al., 2022
931	C18H15O3	Unknown	Unknown	plant biochar leachate	solid phase extraction, FT-ICR-MS	solid phase extraction, FT-ICR-MS	Other	Lignin	Other	Chen et al., 2022; Yan et al., 2022
932	C11H19O8	Unknown	Unknown	plant biochar leachate	solid phase extraction, FT-ICR-MS	solid phase extraction, FT-ICR-MS	Carbohydrate	Carbohydrate	Other	Chen et al., 2022
933	C10H19N2O7	Unknown	Unknown	plant biochar leachate	solid phase extraction, FT-ICR-MS	solid phase extraction, FT-ICR-MS	Carbohydrate	Amino Sugar	Other	Chen et al., 2022
934	C15H19O5	Unknown	Unknown	plant biochar leachate	solid phase extraction, FT-ICR-MS	solid phase extraction, FT-ICR-MS	Lignin	Lignin	Other	Chen et al., 2022; Yan et al., 2022
935	C14H19N2O4	Unknown	Unknown	plant biochar leachate	solid phase extraction, FT-ICR-MS	solid phase extraction, FT-ICR-MS	Lignin	Lignin	Protein	Chen et al., 2022
936	C16H23O4	Unknown	Unknown	plant biochar leachate	solid phase extraction, FT-ICR-MS	solid phase extraction, FT-ICR-MS	Other	Lignin	Other	Chen et al., 2022; Yan et al., 2022
937	C15H23N2O3	Unknown	Unknown	plant biochar leachate	solid phase extraction, FT-ICR-MS	solid phase extraction, FT-ICR-MS	Other	Lipid	Protein	Chen et al., 2022
938	C11H6NO8	Unknown	Unknown	plant biochar leachate	solid phase extraction, FT-ICR-MS	solid phase extraction, FT-ICR-MS	Other	Cond Hydrocarbon	Other	Chen et al., 2022; Yan et al., 2022
939	C15H6NO5	Unknown	Unknown	plant biochar leachate	solid phase extraction, FT-ICR-MS	solid phase extraction, FT-ICR-MS	Cond Hydrocarbon	Cond Hydrocarbon	Other	Chen et al., 2022; Yan et al., 2022
940	C12H10NO7	Unknown	Unknown	plant biochar leachate	solid phase extraction, FT-ICR-MS	solid phase extraction, FT-ICR-MS	Lignin	Lignin	Other	Chen et al., 2022; Yan et al., 2022
941	C16H10NO4	Unknown	Unknown	plant biochar leachate	solid phase extraction, FT-ICR-MS	solid phase extraction, FT-ICR-MS	Cond Hydrocarbon	Cond Hydrocarbon	Other	Chen et al., 2022; Yan et al., 2022
942	C13H14NO6	Unknown	Unknown	plant biochar leachate	solid phase extraction, FT-ICR-MS	solid phase extraction, FT-ICR-MS	Lignin	Lignin	Other	Chen et al., 2022; Yan et al., 2022
943	C10H18NO6S	Unknown	Unknown	plant biochar leachate	solid phase extraction, FT-ICR-MS	solid phase extraction, FT-ICR-MS	Amino Sugar	Amino Sugar	Other	Chen et al., 2022
944	C17H14NO3	Unknown	Unknown	plant biochar leachate	solid phase extraction, FT-ICR-MS	solid phase extraction, FT-ICR-MS	Other	Lignin	Other	Chen et al., 2022
945	C14H18NO5	Unknown	Unknown	plant biochar leachate	solid phase extraction, FT-ICR-MS	solid phase extraction, FT-ICR-MS	Lignin	Lignin	Other	Chen et al., 2022; Yan et al., 2022
946	C15H22NO4	Unknown	Unknown	plant biochar leachate	solid phase extraction, FT-ICR-MS	solid phase extraction, FT-ICR-MS	Other	Lignin	Other	Chen et al., 2022
947	C11H5O9	Unknown	Unknown	plant biochar leachate	solid phase extraction, FT-ICR-MS	solid phase extraction, FT-ICR-MS	Other	Cond Hydrocarbon	Other	Chen et al., 2022; Yan et al., 2022
948	C15H5O6	Unknown	Unknown	plant biochar leachate	solid phase extraction, FT-ICR-MS	solid phase extraction, FT-ICR-MS	Cond Hydrocarbon	Cond Hydrocarbon	Other	Chen et al., 2022; Yan et al., 2022
949	C12H9O6S	Unknown	Unknown	plant biochar leachate	solid phase extraction, FT-ICR-MS	solid phase extraction, FT-ICR-MS	Cond Hydrocarbon	Cond Hydrocarbon	Other	Chen et al., 2022
950	C12H9O8	Unknown	Unknown	plant biochar leachate	solid phase extraction, FT-ICR-MS	solid phase extraction, FT-ICR-MS	Tannin;Cond Hydrocarbon	Cond Hydrocarbon	Other	Chen et al., 2022; Yan et al., 2022
951	C11H9N2O7	Unknown	Unknown	plant biochar leachate	solid phase extraction, FT-ICR-MS	solid phase extraction, FT-ICR-MS	Lignin	Lignin	Other	Chen et al., 2022
952	C16H9O5	Unknown	Unknown	plant biochar leachate	solid phase extraction, FT-ICR-MS	solid phase extraction, FT-ICR-MS	Cond Hydrocarbon	Cond Hydrocarbon	Other	Chen et al., 2022; Yan et al., 2022
953	C13H13O7	Unknown	Unknown	plant biochar leachate	solid phase extraction, FT-ICR-MS	solid phase extraction, FT-ICR-MS	Lignin	Lignin	Other	Chen et al., 2022; Yan et al., 2022
954	C10H17O7S	Unknown	Unknown	plant biochar leachate	solid phase extraction, FT-ICR-MS	solid phase extraction, FT-ICR-MS	Carbohydrate;Amino Sugar	Amino Sugar	Other	Chen et al., 2022
955	C12H13N2O6	Unknown	Unknown	plant biochar leachate	solid phase extraction, FT-ICR-MS	solid phase extraction, FT-ICR-MS	Lignin	Lignin	Protein	Chen et al., 2022; Yan et al., 2022
956	C17H13O4	Unknown	Unknown	plant biochar leachate	solid phase extraction, FT-ICR-MS	solid phase extraction, FT-ICR-MS	Cond Hydrocarbon	Cond Hydrocarbon	Other	Chen et al., 2022; Yan et al., 2022
957	C10H17O9	Unknown	Unknown	plant biochar leachate	solid phase extraction, FT-ICR-MS	solid phase extraction, FT-ICR-MS	Carbohydrate	Carbohydrate	Carbohydrate	Chen et al., 2022
958	C14H17O6	Unknown	Unknown	plant biochar leachate	solid phase extraction, FT-ICR-MS	solid phase extraction, FT-ICR-MS	Lignin	Lignin	Other	Chen et al., 2022; Yan et al., 2022
959	C11H21O6S	Unknown	Unknown	plant biochar leachate	solid phase extraction, FT-ICR-MS	solid phase extraction, FT-ICR-MS	Protein	Protein	Other	Chen et al., 2022
960	C13H17N2O5	Unknown	Unknown	plant biochar leachate	solid phase extraction, FT-ICR-MS	solid phase extraction, FT-ICR-MS	Lignin	Lignin	Protein	Chen et al., 2022
961	C18H17O3	Unknown	Unknown	plant biochar leachate	solid phase extraction, FT-ICR-MS	solid phase extraction, FT-ICR-MS	Other	Lignin	Other	Chen et al., 2022; Yan et al., 2022
962	C11H21O8	Unknown	Unknown	plant biochar leachate	solid phase extraction, FT-ICR-MS	solid phase extraction, FT-ICR-MS	Carbohydrate	Carbohydrate	Other	Chen et al., 2022
963	C15H21O5	Unknown	Unknown	plant biochar leachate	solid phase extraction, FT-ICR-MS	solid phase extraction, FT-ICR-MS	Lignin	Lignin	Other	Chen et al., 2022
964	C14H21N2O4	Unknown	Unknown	plant biochar leachate	solid phase extraction, FT-ICR-MS	solid phase extraction, FT-ICR-MS	Other	Lipid	Protein	Chen et al., 2022
965	C16H25O4	Unknown	Unknown	plant biochar leachate	solid phase extraction, FT-ICR-MS	solid phase extraction, FT-ICR-MS	Lipid	Lipid	Other	Chen et al., 2022
966	C15H25N2O3	Unknown	Unknown	plant biochar leachate	solid phase extraction, FT-ICR-MS	solid phase extraction, FT-ICR-MS	Lipid	Lipid	Protein	Chen et al., 2022
967	C18H33O2	Unknown	Unknown	plant biochar leachate	solid phase extraction, FT-ICR-MS	solid phase extraction, FT-ICR-MS	Lipid	Lipid;Unsat Hydrocarbon	Other	Chen et al., 2022
968	C11H8NO8	Unknown	Unknown	plant biochar leachate	solid phase extraction, FT-ICR-MS	solid phase extraction, FT-ICR-MS	Tannin	Cond Hydrocarbon	Other	Chen et al., 2022; Yan et al., 2022
969	C15H8NO5	Unknown	Unknown	plant biochar leachate	solid phase extraction, FT-ICR-MS	solid phase extraction, FT-ICR-MS	Cond Hydrocarbon	Cond Hydrocarbon	Other	Chen et al., 2022; Yan et al., 2022
970	C12H12NO5S	Unknown	Unknown	plant biochar leachate	solid phase extraction, FT-ICR-MS	solid phase extraction, FT-ICR-MS	Lignin	Lignin	Other	Chen et al., 2022
971	C12H12NO7	Unknown	Unknown	plant biochar leachate	solid phase extraction, FT-ICR-MS	solid phase extraction, FT-ICR-MS	Lignin	Lignin	Other	Chen et al., 2022; Yan et al., 2022
972	C18H8N3O	Unknown	Unknown	plant biochar leachate	solid phase extraction, FT-ICR-MS	solid phase extraction, FT-ICR-MS	Other	Cond Hydrocarbon	Other	Chen et al., 2022
973	C15H12N3OS	Unknown	Unknown	plant biochar leachate	solid phase extraction, FT-ICR-MS	solid phase extraction, FT-ICR-MS	Unsat Hydrocarbon	Unsat Hydrocarbon	Other	Chen et al., 2022
974	C16H12NO4	Unknown	Unknown	plant biochar leachate	solid phase extraction, FT-ICR-MS	solid phase extraction, FT-ICR-MS	Cond Hydrocarbon	Cond Hydrocarbon	Other	Chen et al., 2022; Yan et al., 2022
975	C13H16NO6	Unknown	Unknown	plant biochar leachate	solid phase extraction, FT-ICR-MS	solid phase extraction, FT-ICR-MS	Lignin	Lignin	Other	Chen et al., 2022; Yan et al., 2022
976	C12H16N3O5	Unknown	Unknown	plant biochar leachate	solid phase extraction, FT-ICR-MS	solid phase extraction, FT-ICR-MS	Lignin	Lignin	Protein	Chen et al., 2022
977	C17H16NO3	Unknown	Unknown	plant biochar leachate	solid phase extraction, FT-ICR-MS	solid phase extraction, FT-ICR-MS	Other	Lignin	Other	Chen et al., 2022; Yan et al., 2022
978	C14H20NO5	Unknown	Unknown	plant biochar leachate	solid phase extraction, FT-ICR-MS	solid phase extraction, FT-ICR-MS	Lignin	Lignin	Other	Chen et al., 2022
979	C15H24NO4	Unknown	Unknown	plant biochar leachate	solid phase extraction, FT-ICR-MS	solid phase extraction, FT-ICR-MS	Lipid	Lipid	Other	Chen et al., 2022
980	C11H7O7S	Unknown	Unknown	plant biochar leachate	solid phase extraction, FT-ICR-MS	solid phase extraction, FT-ICR-MS	Cond Hydrocarbon	Cond Hydrocarbon	Other	Chen et al., 2022
981	C11H7O9	Unknown	Unknown	plant biochar leachate	solid phase extraction, FT-ICR-MS	solid phase extraction, FT-ICR-MS	Other	Cond Hydrocarbon	Other	Chen et al., 2022; Yan et al., 2022
982	C15H7O6	Unknown	Unknown	plant biochar leachate	solid phase extraction, FT-ICR-MS	solid phase extraction, FT-ICR-MS	Cond Hydrocarbon	Cond Hydrocarbon	Other	Chen et al., 2022; Yan et al., 2022
983	C12H11O8	Unknown	Unknown	plant biochar leachate	solid phase extraction, FT-ICR-MS	solid phase extraction, FT-ICR-MS	Tannin	Tannin	Other	Chen et al., 2022; Yan et al., 2022
984	C9H15O8S	Unknown	Unknown	plant biochar leachate	solid phase extraction, FT-ICR-MS	solid phase extraction, FT-ICR-MS	Carbohydrate	Carbohydrate	Carbohydrate	Chen et al., 2022
985	C11H11N2O7	Unknown	Unknown	plant biochar leachate	solid phase extraction, FT-ICR-MS	solid phase extraction, FT-ICR-MS	Lignin	Lignin	Other	Chen et al., 2022
986	C16H11O5	Unknown	Unknown	plant biochar leachate	solid phase extraction, FT-ICR-MS	solid phase extraction, FT-ICR-MS	Cond Hydrocarbon	Cond Hydrocarbon	Other	Chen et al., 2022; Yan et al., 2022
987	C15H11N2O4	Unknown	Unknown	plant biochar leachate	solid phase extraction, FT-ICR-MS	solid phase extraction, FT-ICR-MS	Cond Hydrocarbon	Cond Hydrocarbon	Other	Chen et al., 2022
988	C13H15O7	Unknown	Unknown	plant biochar leachate	solid phase extraction, FT-ICR-MS	solid phase extraction, FT-ICR-MS	Lignin	Lignin	Other	Chen et al., 2022; Yan et al., 2022
989	C12H15N2O6	Unknown	Unknown	plant biochar leachate	solid phase extraction, FT-ICR-MS	solid phase extraction, FT-ICR-MS	Lignin	Lignin	Protein	Chen et al., 2022; Yan et al., 2022
990	C17H15O4	Unknown	Unknown	plant biochar leachate	solid phase extraction, FT-ICR-MS	solid phase extraction, FT-ICR-MS	Other	Lignin	Other	Chen et al., 2022; Yan et al., 2022
991	C16H15N2O3	Unknown	Unknown	plant biochar leachate	solid phase extraction, FT-ICR-MS	solid phase extraction, FT-ICR-MS	Other	Lignin	Other	Chen et al., 2022
992	C9H19N2O8	Unknown	Unknown	plant biochar leachate	solid phase extraction, FT-ICR-MS	solid phase extraction, FT-ICR-MS	Carbohydrate	Carbohydrate	Protein	Chen et al., 2022
993	C14H19O6	Unknown	Unknown	plant biochar leachate	solid phase extraction, FT-ICR-MS	solid phase extraction, FT-ICR-MS	Lignin	Lignin	Other	Chen et al., 2022; Yan et al., 2022
994	C13H19N2O5	Unknown	Unknown	plant biochar leachate	solid phase extraction, FT-ICR-MS	solid phase extraction, FT-ICR-MS	Protein	Lignin	Protein	Chen et al., 2022
995	C18H19O3	Unknown	Unknown	plant biochar leachate	solid phase extraction, FT-ICR-MS	solid phase extraction, FT-ICR-MS	Other	Lignin	Other	Chen et al., 2022; Yan et al., 2022
996	C15H23O5	Unknown	Unknown	plant biochar leachate	solid phase extraction, FT-ICR-MS	solid phase extraction, FT-ICR-MS	Protein	Protein	Other	Chen et al., 2022
997	C14H23N2O4	Unknown	Unknown	plant biochar leachate	solid phase extraction, FT-ICR-MS	solid phase extraction, FT-ICR-MS	Lipid	Lipid	Protein	Chen et al., 2022
998	C16H27O4	Unknown	Unknown	plant biochar leachate	solid phase extraction, FT-ICR-MS	solid phase extraction, FT-ICR-MS	Lipid	Lipid	Other	Chen et al., 2022; Yan et al., 2022
999	C19H39O	Unknown	Unknown	plant biochar leachate	solid phase extraction, FT-ICR-MS	solid phase extraction, FT-ICR-MS	Lipid	Lipid;Unsat Hydrocarbon	Other	Chen et al., 2022
1000	C10H6NO9	Unknown	Unknown	plant biochar leachate	solid phase extraction, FT-ICR-MS	solid phase extraction, FT-ICR-MS	Other	Cond Hydrocarbon	Other	Chen et al., 2022
1001	C14H6NO6	Unknown	Unknown	plant biochar leachate	solid phase extraction, FT-ICR-MS	solid phase extraction, FT-ICR-MS	Cond Hydrocarbon	Cond Hydrocarbon	Other	Chen et al., 2022; Yan et al., 2022
1002	C11H10NO8	Unknown	Unknown	plant biochar leachate	solid phase extraction, FT-ICR-MS	solid phase extraction, FT-ICR-MS	Tannin	Tannin	Other	Chen et al., 2022
1003	C8H14NO8S	Unknown	Unknown	plant biochar leachate	solid phase extraction, FT-ICR-MS	solid phase extraction, FT-ICR-MS	Carbohydrate	Carbohydrate	Other	Chen et al., 2022
1004	C15H10NO5	Unknown	Unknown	plant biochar leachate	solid phase extraction, FT-ICR-MS	solid phase extraction, FT-ICR-MS	Cond Hydrocarbon	Cond Hydrocarbon	Other	Chen et al., 2022; Yan et al., 2022
1005	C19H10NO2	Unknown	Unknown	plant biochar leachate	solid phase extraction, FT-ICR-MS	solid phase extraction, FT-ICR-MS	Other	Cond Hydrocarbon	Other	Chen et al., 2022
1006	C12H14NO7	Unknown	Unknown	plant biochar leachate	solid phase extraction, FT-ICR-MS	solid phase extraction, FT-ICR-MS	Lignin	Lignin	Other	Chen et al., 2022; Yan et al., 2022
1007	C15H14N3OS	Unknown	Unknown	plant biochar leachate	solid phase extraction, FT-ICR-MS	solid phase extraction, FT-ICR-MS	Unsat Hydrocarbon	Unsat Hydrocarbon	Other	Chen et al., 2022
1008	C16H14NO4	Unknown	Unknown	plant biochar leachate	solid phase extraction, FT-ICR-MS	solid phase extraction, FT-ICR-MS	Other	Lignin	Other	Chen et al., 2022; Yan et al., 2022
1009	C17H18NOS	Unknown	Unknown	plant biochar leachate	solid phase extraction, FT-ICR-MS	solid phase extraction, FT-ICR-MS	Unsat Hydrocarbon	Unsat Hydrocarbon	Other	Chen et al., 2022
1010	C13H18NO6	Unknown	Unknown	plant biochar leachate	solid phase extraction, FT-ICR-MS	solid phase extraction, FT-ICR-MS	Lignin	Lignin	Other	Chen et al., 2022; Yan et al., 2022
1011	C12H18N3O5	Unknown	Unknown	plant biochar leachate	solid phase extraction, FT-ICR-MS	solid phase extraction, FT-ICR-MS	Protein	Protein	Protein	Chen et al., 2022
1012	C17H18NO3	Unknown	Unknown	plant biochar leachate	solid phase extraction, FT-ICR-MS	solid phase extraction, FT-ICR-MS	Other	Lignin	Other	Chen et al., 2022
1013	C14H22NO5	Unknown	Unknown	plant biochar leachate	solid phase extraction, FT-ICR-MS	solid phase extraction, FT-ICR-MS	Protein	Protein	Other	Chen et al., 2022
1014	C10H5O8S	Unknown	Unknown	plant biochar leachate	solid phase extraction, FT-ICR-MS	solid phase extraction, FT-ICR-MS	Other	Cond Hydrocarbon	Other	Chen et al., 2022
1015	C10H5O10	Unknown	Unknown	plant biochar leachate	solid phase extraction, FT-ICR-MS	solid phase extraction, FT-ICR-MS	Other	Other	Other	Chen et al., 2022
1016	C14H5O7	Unknown	Unknown	plant biochar leachate	solid phase extraction, FT-ICR-MS	solid phase extraction, FT-ICR-MS	Cond Hydrocarbon	Cond Hydrocarbon	Other	Chen et al., 2022; Yan et al., 2022
1017	C11H9O7S	Unknown	Unknown	plant biochar leachate	solid phase extraction, FT-ICR-MS	solid phase extraction, FT-ICR-MS	Lignin	Lignin	Other	Chen et al., 2022
1018	C11H9O9	Unknown	Unknown	plant biochar leachate	solid phase extraction, FT-ICR-MS	solid phase extraction, FT-ICR-MS	Tannin	Tannin	Other	Chen et al., 2022
1019	C10H9N2O8	Unknown	Unknown	plant biochar leachate	solid phase extraction, FT-ICR-MS	solid phase extraction, FT-ICR-MS	Tannin	Tannin	Other	Chen et al., 2022
1020	C15H9O6	Unknown	Unknown	plant biochar leachate	solid phase extraction, FT-ICR-MS	solid phase extraction, FT-ICR-MS	Cond Hydrocarbon	Cond Hydrocarbon	Other	Chen et al., 2022; Yan et al., 2022
1021	C12H13O6S	Unknown	Unknown	plant biochar leachate	solid phase extraction, FT-ICR-MS	solid phase extraction, FT-ICR-MS	Lignin	Lignin	Other	Chen et al., 2022
1022	C12H13O8	Unknown	Unknown	plant biochar leachate	solid phase extraction, FT-ICR-MS	solid phase extraction, FT-ICR-MS	Tannin	Tannin	Other	Chen et al., 2022; Yan et al., 2022
1023	C11H13N2O7	Unknown	Unknown	plant biochar leachate	solid phase extraction, FT-ICR-MS	solid phase extraction, FT-ICR-MS	Lignin	Lignin	Other	Chen et al., 2022
1024	C16H13O5	Unknown	Unknown	plant biochar leachate	solid phase extraction, FT-ICR-MS	solid phase extraction, FT-ICR-MS	Lignin	Lignin	Other	Chen et al., 2022; Yan et al., 2022
1025	C13H17O5S	Unknown	Unknown	plant biochar leachate	solid phase extraction, FT-ICR-MS	solid phase extraction, FT-ICR-MS	Lignin	Lignin	Other	Chen et al., 2022
1026	C15H13N2O4	Unknown	Unknown	plant biochar leachate	solid phase extraction, FT-ICR-MS	solid phase extraction, FT-ICR-MS	Other	Lignin	Other	Chen et al., 2022; Yan et al., 2022
1027	C13H17O7	Unknown	Unknown	plant biochar leachate	solid phase extraction, FT-ICR-MS	solid phase extraction, FT-ICR-MS	Lignin	Lignin	Other	Chen et al., 2022
1028	C12H17N2O6	Unknown	Unknown	plant biochar leachate	solid phase extraction, FT-ICR-MS	solid phase extraction, FT-ICR-MS	Lignin	Lignin	Protein	Chen et al., 2022
1029	C17H17O4	Unknown	Unknown	plant biochar leachate	solid phase extraction, FT-ICR-MS	solid phase extraction, FT-ICR-MS	Other	Lignin	Other	Chen et al., 2022; Yan et al., 2022
1030	C14H21O6	Unknown	Unknown	plant biochar leachate	solid phase extraction, FT-ICR-MS	solid phase extraction, FT-ICR-MS	Protein	Protein	Other	Chen et al., 2022; Yan et al., 2022
1031	C13H21N2O5	Unknown	Unknown	plant biochar leachate	solid phase extraction, FT-ICR-MS	solid phase extraction, FT-ICR-MS	Protein	Protein	Protein	Chen et al., 2022
1032	C18H21O3	Unknown	Unknown	plant biochar leachate	solid phase extraction, FT-ICR-MS	solid phase extraction, FT-ICR-MS	Other	Lignin	Other	Chen et al., 2022
1033	C15H25O5	Unknown	Unknown	plant biochar leachate	solid phase extraction, FT-ICR-MS	solid phase extraction, FT-ICR-MS	Protein	Protein	Other	Chen et al., 2022
1034	C14H25N2O4	Unknown	Unknown	plant biochar leachate	solid phase extraction, FT-ICR-MS	solid phase extraction, FT-ICR-MS	Lipid	Lipid	Protein	Chen et al., 2022
1035	C16H29O4	Unknown	Unknown	plant biochar leachate	solid phase extraction, FT-ICR-MS	solid phase extraction, FT-ICR-MS	Lipid	Lipid	Other	Chen et al., 2022; Yan et al., 2022
1036	C20H29O	Unknown	Unknown	plant biochar leachate	solid phase extraction, FT-ICR-MS	solid phase extraction, FT-ICR-MS	Unsat Hydrocarbon	Unsat Hydrocarbon	Other	Chen et al., 2022
1037	C9H4NO10	Unknown	Unknown	plant biochar leachate	solid phase extraction, FT-ICR-MS	solid phase extraction, FT-ICR-MS	Other	Other	Other	Chen et al., 2022
1038	C13H4NO7	Unknown	Unknown	plant biochar leachate	solid phase extraction, FT-ICR-MS	solid phase extraction, FT-ICR-MS	Cond Hydrocarbon	Cond Hydrocarbon	Other	Chen et al., 2022
1039	C10H8NO9	Unknown	Unknown	plant biochar leachate	solid phase extraction, FT-ICR-MS	solid phase extraction, FT-ICR-MS	Tannin	Tannin	Other	Chen et al., 2022
1040	C14H8NO6	Unknown	Unknown	plant biochar leachate	solid phase extraction, FT-ICR-MS	solid phase extraction, FT-ICR-MS	Cond Hydrocarbon	Cond Hydrocarbon	Other	Chen et al., 2022; Yan et al., 2022
1041	C11H12NO8	Unknown	Unknown	plant biochar leachate	solid phase extraction, FT-ICR-MS	solid phase extraction, FT-ICR-MS	Tannin	Tannin	Other	Chen et al., 2022; Yan et al., 2022
1042	C17H8N3O2	Unknown	Unknown	plant biochar leachate	solid phase extraction, FT-ICR-MS	solid phase extraction, FT-ICR-MS	Other	Cond Hydrocarbon	Other	Chen et al., 2022
1043	C15H12NO5	Unknown	Unknown	plant biochar leachate	solid phase extraction, FT-ICR-MS	solid phase extraction, FT-ICR-MS	Cond Hydrocarbon	Lignin	Other	Chen et al., 2022; Yan et al., 2022
1044	C12H16NO7	Unknown	Unknown	plant biochar leachate	solid phase extraction, FT-ICR-MS	solid phase extraction, FT-ICR-MS	Lignin	Lignin	Other	Chen et al., 2022
1045	C16H16NO4	Unknown	Unknown	plant biochar leachate	solid phase extraction, FT-ICR-MS	solid phase extraction, FT-ICR-MS	Other	Lignin	Other	Chen et al., 2022; Yan et al., 2022
1046	C13H20NO6	Unknown	Unknown	plant biochar leachate	solid phase extraction, FT-ICR-MS	solid phase extraction, FT-ICR-MS	Protein	Protein	Other	Chen et al., 2022
1047	C17H20NO3	Unknown	Unknown	plant biochar leachate	solid phase extraction, FT-ICR-MS	solid phase extraction, FT-ICR-MS	Other	Lignin	Other	Chen et al., 2022
1048	C14H24NO5	Unknown	Unknown	plant biochar leachate	solid phase extraction, FT-ICR-MS	solid phase extraction, FT-ICR-MS	Protein	Protein	Other	Chen et al., 2022
1049	C9H3O9S	Unknown	Unknown	plant biochar leachate	solid phase extraction, FT-ICR-MS	solid phase extraction, FT-ICR-MS	Other	Other	Other	Chen et al., 2022
1050	C10H7O8S	Unknown	Unknown	plant biochar leachate	solid phase extraction, FT-ICR-MS	solid phase extraction, FT-ICR-MS	Tannin	Cond Hydrocarbon	Other	Chen et al., 2022
1051	C10H7O10	Unknown	Unknown	plant biochar leachate	solid phase extraction, FT-ICR-MS	solid phase extraction, FT-ICR-MS	Tannin	Other	Other	Chen et al., 2022
1052	C14H7O7	Unknown	Unknown	plant biochar leachate	solid phase extraction, FT-ICR-MS	solid phase extraction, FT-ICR-MS	Cond Hydrocarbon	Cond Hydrocarbon	Other	Chen et al., 2022; Goranov et al., 2020; Yan et al., 2022
1053	C11H11O7S	Unknown	Unknown	plant biochar leachate	solid phase extraction, FT-ICR-MS	solid phase extraction, FT-ICR-MS	Lignin	Lignin	Other	Chen et al., 2022
1054	C13H7N2O6	Unknown	Unknown	plant biochar leachate	solid phase extraction, FT-ICR-MS	solid phase extraction, FT-ICR-MS	Cond Hydrocarbon	Cond Hydrocarbon	Other	Chen et al., 2022; Yan et al., 2022
1055	C11H11O9	Unknown	Unknown	plant biochar leachate	solid phase extraction, FT-ICR-MS	solid phase extraction, FT-ICR-MS	Tannin	Tannin	Other	Chen et al., 2022
1056	C15H11O6	Unknown	Unknown	plant biochar leachate	solid phase extraction, FT-ICR-MS	solid phase extraction, FT-ICR-MS	Cond Hydrocarbon	Cond Hydrocarbon	Other	Chen et al., 2022; Goranov et al., 2020; Yan et al., 2022
1057	C12H15O6S	Unknown	Unknown	plant biochar leachate	solid phase extraction, FT-ICR-MS	solid phase extraction, FT-ICR-MS	Lignin	Lignin	Other	Chen et al., 2022
1058	C14H11N2O5	Unknown	Unknown	plant biochar leachate	solid phase extraction, FT-ICR-MS	solid phase extraction, FT-ICR-MS	Cond Hydrocarbon	Cond Hydrocarbon	Other	Chen et al., 2022; Yan et al., 2022
1059	C12H15O8	Unknown	Unknown	plant biochar leachate	solid phase extraction, FT-ICR-MS	solid phase extraction, FT-ICR-MS	Tannin	Tannin	Other	Chen et al., 2022; Yan et al., 2022
1060	C11H15N2O7	Unknown	Unknown	plant biochar leachate	solid phase extraction, FT-ICR-MS	solid phase extraction, FT-ICR-MS	Lignin;Amino Sugar	Lignin	Other	Chen et al., 2022
1061	C16H15O5	Unknown	Unknown	plant biochar leachate	solid phase extraction, FT-ICR-MS	solid phase extraction, FT-ICR-MS	Lignin	Lignin	Other	Chen et al., 2022; Yan et al., 2022
1062	C15H15N2O4	Unknown	Unknown	plant biochar leachate	solid phase extraction, FT-ICR-MS	solid phase extraction, FT-ICR-MS	Other	Lignin	Protein	Chen et al., 2022; Yan et al., 2022
1063	C13H19O7	Unknown	Unknown	plant biochar leachate	solid phase extraction, FT-ICR-MS	solid phase extraction, FT-ICR-MS	Protein	Lignin	Other	Chen et al., 2022
1064	C19H15N2O	Unknown	Unknown	plant biochar leachate	solid phase extraction, FT-ICR-MS	solid phase extraction, FT-ICR-MS	Unsat Hydrocarbon	Cond Hydrocarbon	Other	Chen et al., 2022
1065	C12H19N2O6	Unknown	Unknown	plant biochar leachate	solid phase extraction, FT-ICR-MS	solid phase extraction, FT-ICR-MS	Protein	Protein	Protein	Chen et al., 2022
1066	C17H19O4	Unknown	Unknown	plant biochar leachate	solid phase extraction, FT-ICR-MS	solid phase extraction, FT-ICR-MS	Other	Lignin	Other	Chen et al., 2022
1067	C16H19N2O3	Unknown	Unknown	plant biochar leachate	solid phase extraction, FT-ICR-MS	solid phase extraction, FT-ICR-MS	Other	Lignin	Other	Chen et al., 2022
1068	C14H23O6	Unknown	Unknown	plant biochar leachate	solid phase extraction, FT-ICR-MS	solid phase extraction, FT-ICR-MS	Protein	Protein	Other	Chen et al., 2022; Yan et al., 2022
1069	C13H23N2O5	Unknown	Unknown	plant biochar leachate	solid phase extraction, FT-ICR-MS	solid phase extraction, FT-ICR-MS	Protein	Protein	Protein	Chen et al., 2022
1070	C15H27O3S	Unknown	Unknown	plant biochar leachate	solid phase extraction, FT-ICR-MS	solid phase extraction, FT-ICR-MS	Lipid	Lipid	Other	Chen et al., 2022
1071	C9H6NO8S	Unknown	Unknown	plant biochar leachate	solid phase extraction, FT-ICR-MS	solid phase extraction, FT-ICR-MS	Other	Cond Hydrocarbon	Other	Chen et al., 2022
1072	C13H6NO7	Unknown	Unknown	plant biochar leachate	solid phase extraction, FT-ICR-MS	solid phase extraction, FT-ICR-MS	Cond Hydrocarbon	Cond Hydrocarbon	Other	Chen et al., 2022; Yan et al., 2022
1073	C14H10NO6	Unknown	Unknown	plant biochar leachate	solid phase extraction, FT-ICR-MS	solid phase extraction, FT-ICR-MS	Cond Hydrocarbon	Cond Hydrocarbon	Other	Chen et al., 2022; Yan et al., 2022
1074	C11H14NO8	Unknown	Unknown	plant biochar leachate	solid phase extraction, FT-ICR-MS	solid phase extraction, FT-ICR-MS	Tannin	Tannin	Other	Chen et al., 2022
1075	C15H14NO5	Unknown	Unknown	plant biochar leachate	solid phase extraction, FT-ICR-MS	solid phase extraction, FT-ICR-MS	Lignin	Lignin	Other	Chen et al., 2022; Yan et al., 2022
1076	C12H18NO7	Unknown	Unknown	plant biochar leachate	solid phase extraction, FT-ICR-MS	solid phase extraction, FT-ICR-MS	Amino Sugar	Amino Sugar	Other	Chen et al., 2022
1077	C18H14N3O	Unknown	Unknown	plant biochar leachate	solid phase extraction, FT-ICR-MS	solid phase extraction, FT-ICR-MS	Unsat Hydrocarbon	Cond Hydrocarbon	Other	Chen et al., 2022
1078	C11H18N3O6	Unknown	Unknown	plant biochar leachate	solid phase extraction, FT-ICR-MS	solid phase extraction, FT-ICR-MS	Protein;Amino Sugar	Protein	Protein	Chen et al., 2022
1079	C16H18NO4	Unknown	Unknown	plant biochar leachate	solid phase extraction, FT-ICR-MS	solid phase extraction, FT-ICR-MS	Other	Lignin	Other	Chen et al., 2022
1080	C20H18NO	Unknown	Unknown	plant biochar leachate	solid phase extraction, FT-ICR-MS	solid phase extraction, FT-ICR-MS	Unsat Hydrocarbon	Unsat Hydrocarbon	Other	Chen et al., 2022
1081	C13H22NO6	Unknown	Unknown	plant biochar leachate	solid phase extraction, FT-ICR-MS	solid phase extraction, FT-ICR-MS	Protein	Protein	Other	Chen et al., 2022
1082	C14H26NO5	Unknown	Unknown	plant biochar leachate	solid phase extraction, FT-ICR-MS	solid phase extraction, FT-ICR-MS	Protein	Protein	Other	Chen et al., 2022
1083	C9H5O9S	Unknown	Unknown	plant biochar leachate	solid phase extraction, FT-ICR-MS	solid phase extraction, FT-ICR-MS	Other	Other	Other	Chen et al., 2022
1084	C13H5O8	Unknown	Unknown	plant biochar leachate	solid phase extraction, FT-ICR-MS	solid phase extraction, FT-ICR-MS	Cond Hydrocarbon	Cond Hydrocarbon	Other	Chen et al., 2022; Yan et al., 2022
1085	C10H9O8S	Unknown	Unknown	plant biochar leachate	solid phase extraction, FT-ICR-MS	solid phase extraction, FT-ICR-MS	Tannin	Tannin	Other	Chen et al., 2022
1086	C10H9O10	Unknown	Unknown	plant biochar leachate	solid phase extraction, FT-ICR-MS	solid phase extraction, FT-ICR-MS	Tannin	Tannin	Other	Chen et al., 2022
1087	C14H9O7	Unknown	Unknown	plant biochar leachate	solid phase extraction, FT-ICR-MS	solid phase extraction, FT-ICR-MS	Cond Hydrocarbon	Cond Hydrocarbon	Other	Chen et al., 2022; Goranov et al., 2020; Yan et al., 2022
1088	C11H13O7S	Unknown	Unknown	plant biochar leachate	solid phase extraction, FT-ICR-MS	solid phase extraction, FT-ICR-MS	Lignin	Lignin	Other	Chen et al., 2022
1089	C13H9N2O6	Unknown	Unknown	plant biochar leachate	solid phase extraction, FT-ICR-MS	solid phase extraction, FT-ICR-MS	Cond Hydrocarbon	Cond Hydrocarbon	Other	Chen et al., 2022; Yan et al., 2022
1090	C18H9O4	Unknown	Unknown	plant biochar leachate	solid phase extraction, FT-ICR-MS	solid phase extraction, FT-ICR-MS	Cond Hydrocarbon	Cond Hydrocarbon	Other	Chen et al., 2022; Yan et al., 2022
1091	C11H13O9	Unknown	Unknown	plant biochar leachate	solid phase extraction, FT-ICR-MS	solid phase extraction, FT-ICR-MS	Tannin	Tannin	Other	Chen et al., 2022
1092	C15H13O6	Unknown	Unknown	plant biochar leachate	solid phase extraction, FT-ICR-MS	solid phase extraction, FT-ICR-MS	Lignin	Lignin	Other	Chen et al., 2022; Yan et al., 2022
1093	C14H13N2O5	Unknown	Unknown	plant biochar leachate	solid phase extraction, FT-ICR-MS	solid phase extraction, FT-ICR-MS	Lignin	Lignin	Protein	Chen et al., 2022; Yan et al., 2022
1094	C12H17O8	Unknown	Unknown	plant biochar leachate	solid phase extraction, FT-ICR-MS	solid phase extraction, FT-ICR-MS	Amino Sugar	Tannin	Other	Chen et al., 2022; Yan et al., 2022
1095	C11H17N2O7	Unknown	Unknown	plant biochar leachate	solid phase extraction, FT-ICR-MS	solid phase extraction, FT-ICR-MS	Amino Sugar	Amino Sugar	Other	Chen et al., 2022
1096	C16H17O5	Unknown	Unknown	plant biochar leachate	solid phase extraction, FT-ICR-MS	solid phase extraction, FT-ICR-MS	Lignin	Lignin	Other	Chen et al., 2022; Yan et al., 2022
1097	C15H17N2O4	Unknown	Unknown	plant biochar leachate	solid phase extraction, FT-ICR-MS	solid phase extraction, FT-ICR-MS	Other	Lignin	Protein	Chen et al., 2022
1098	C13H21O7	Unknown	Unknown	plant biochar leachate	solid phase extraction, FT-ICR-MS	solid phase extraction, FT-ICR-MS	Protein	Protein	Other	Chen et al., 2022
1099	C17H21O4	Unknown	Unknown	plant biochar leachate	solid phase extraction, FT-ICR-MS	solid phase extraction, FT-ICR-MS	Other	Lignin	Other	Chen et al., 2022
1100	C16H21N2O3	Unknown	Unknown	plant biochar leachate	solid phase extraction, FT-ICR-MS	solid phase extraction, FT-ICR-MS	Other	Lignin	Other	Chen et al., 2022
1101	C18H25O3	Unknown	Unknown	plant biochar leachate	solid phase extraction, FT-ICR-MS	solid phase extraction, FT-ICR-MS	Other	Lignin	Other	Chen et al., 2022
1102	C12H4NO8	Unknown	Unknown	plant biochar leachate	solid phase extraction, FT-ICR-MS	solid phase extraction, FT-ICR-MS	Cond Hydrocarbon	Cond Hydrocarbon	Other	Chen et al., 2022
1103	C13H8NO7	Unknown	Unknown	plant biochar leachate	solid phase extraction, FT-ICR-MS	solid phase extraction, FT-ICR-MS	Cond Hydrocarbon	Cond Hydrocarbon	Other	Chen et al., 2022; Yan et al., 2022
1104	C17H8NO4	Unknown	Unknown	plant biochar leachate	solid phase extraction, FT-ICR-MS	solid phase extraction, FT-ICR-MS	Cond Hydrocarbon	Cond Hydrocarbon	Other	Chen et al., 2022
1105	C10H12NO9	Unknown	Unknown	plant biochar leachate	solid phase extraction, FT-ICR-MS	solid phase extraction, FT-ICR-MS	Tannin	Tannin	Other	Chen et al., 2022
1106	C16H8N3O3	Unknown	Unknown	plant biochar leachate	solid phase extraction, FT-ICR-MS	solid phase extraction, FT-ICR-MS	Cond Hydrocarbon	Cond Hydrocarbon	Other	Chen et al., 2022
1107	C14H12NO6	Unknown	Unknown	plant biochar leachate	solid phase extraction, FT-ICR-MS	solid phase extraction, FT-ICR-MS	Lignin	Lignin	Other	Chen et al., 2022; Yan et al., 2022
1108	C18H12NO3	Unknown	Unknown	plant biochar leachate	solid phase extraction, FT-ICR-MS	solid phase extraction, FT-ICR-MS	Cond Hydrocarbon	Cond Hydrocarbon	Other	Chen et al., 2022
1109	C11H16NO8	Unknown	Unknown	plant biochar leachate	solid phase extraction, FT-ICR-MS	solid phase extraction, FT-ICR-MS	Other	Tannin	Other	Chen et al., 2022
1110	C15H16NO5	Unknown	Unknown	plant biochar leachate	solid phase extraction, FT-ICR-MS	solid phase extraction, FT-ICR-MS	Lignin	Lignin	Other	Chen et al., 2022; Yan et al., 2022
1111	C14H16N3O4	Unknown	Unknown	plant biochar leachate	solid phase extraction, FT-ICR-MS	solid phase extraction, FT-ICR-MS	Lignin	Lignin	Protein	Chen et al., 2022
1112	C12H20NO7	Unknown	Unknown	plant biochar leachate	solid phase extraction, FT-ICR-MS	solid phase extraction, FT-ICR-MS	Amino Sugar	Amino Sugar	Other	Chen et al., 2022
1113	C16H20NO4	Unknown	Unknown	plant biochar leachate	solid phase extraction, FT-ICR-MS	solid phase extraction, FT-ICR-MS	Other	Lignin	Other	Chen et al., 2022; Yan et al., 2022
1114	C13H24NO4S	Unknown	Unknown	plant biochar leachate	solid phase extraction, FT-ICR-MS	solid phase extraction, FT-ICR-MS	Protein	Protein	Other	Chen et al., 2022
1115	C9H7O9S	Unknown	Unknown	plant biochar leachate	solid phase extraction, FT-ICR-MS	solid phase extraction, FT-ICR-MS	Tannin	Other	Other	Chen et al., 2022
1116	C13H7O6S	Unknown	Unknown	plant biochar leachate	solid phase extraction, FT-ICR-MS	solid phase extraction, FT-ICR-MS	Cond Hydrocarbon	Cond Hydrocarbon	Other	Chen et al., 2022
1117	C13H7O8	Unknown	Unknown	plant biochar leachate	solid phase extraction, FT-ICR-MS	solid phase extraction, FT-ICR-MS	Cond Hydrocarbon	Cond Hydrocarbon	Other	Chen et al., 2022; Yan et al., 2022
1118	C10H11O8S	Unknown	Unknown	plant biochar leachate	solid phase extraction, FT-ICR-MS	solid phase extraction, FT-ICR-MS	Tannin	Tannin	Other	Chen et al., 2022
1119	C12H7N2O7	Unknown	Unknown	plant biochar leachate	solid phase extraction, FT-ICR-MS	solid phase extraction, FT-ICR-MS	Cond Hydrocarbon	Cond Hydrocarbon	Other	Chen et al., 2022; Yan et al., 2022
1120	C17H7O5	Unknown	Unknown	plant biochar leachate	solid phase extraction, FT-ICR-MS	solid phase extraction, FT-ICR-MS	Cond Hydrocarbon	Cond Hydrocarbon	Other	Chen et al., 2022
1121	C10H11O10	Unknown	Unknown	plant biochar leachate	solid phase extraction, FT-ICR-MS	solid phase extraction, FT-ICR-MS	Tannin	Tannin	Other	Chen et al., 2022
1122	C21H7O2	Unknown	Unknown	plant biochar leachate	solid phase extraction, FT-ICR-MS	solid phase extraction, FT-ICR-MS	Other	Cond Hydrocarbon	Other	Chen et al., 2022
1123	C14H11O7	Unknown	Unknown	plant biochar leachate	solid phase extraction, FT-ICR-MS	solid phase extraction, FT-ICR-MS	Cond Hydrocarbon	Cond Hydrocarbon	Other	Chen et al., 2022; Yan et al., 2022
1124	C13H11N2O6	Unknown	Unknown	plant biochar leachate	solid phase extraction, FT-ICR-MS	solid phase extraction, FT-ICR-MS	Lignin	Lignin	Other	Chen et al., 2022; Yan et al., 2022
1125	C18H11O4	Unknown	Unknown	plant biochar leachate	solid phase extraction, FT-ICR-MS	solid phase extraction, FT-ICR-MS	Cond Hydrocarbon	Cond Hydrocarbon	Other	Chen et al., 2022; Yan et al., 2022
1126	C11H15O9	Unknown	Unknown	plant biochar leachate	solid phase extraction, FT-ICR-MS	solid phase extraction, FT-ICR-MS	Other	Tannin	Other	Chen et al., 2022
1127	C15H15O6	Unknown	Unknown	plant biochar leachate	solid phase extraction, FT-ICR-MS	solid phase extraction, FT-ICR-MS	Lignin	Lignin	Other	Chen et al., 2022; Yan et al., 2022
1128	C14H15N2O5	Unknown	Unknown	plant biochar leachate	solid phase extraction, FT-ICR-MS	solid phase extraction, FT-ICR-MS	Lignin	Lignin	Protein	Chen et al., 2022; Yan et al., 2022
1129	C19H15O3	Unknown	Unknown	plant biochar leachate	solid phase extraction, FT-ICR-MS	solid phase extraction, FT-ICR-MS	Cond Hydrocarbon	Cond Hydrocarbon	Other	Chen et al., 2022
1130	C12H19O8	Unknown	Unknown	plant biochar leachate	solid phase extraction, FT-ICR-MS	solid phase extraction, FT-ICR-MS	Amino Sugar	Amino Sugar	Other	Chen et al., 2022
1131	C16H19O5	Unknown	Unknown	plant biochar leachate	solid phase extraction, FT-ICR-MS	solid phase extraction, FT-ICR-MS	Lignin	Lignin	Other	Chen et al., 2022; Yan et al., 2022
1132	C15H19N2O4	Unknown	Unknown	plant biochar leachate	solid phase extraction, FT-ICR-MS	solid phase extraction, FT-ICR-MS	Other	Lignin	Protein	Chen et al., 2022
1133	C17H23O4	Unknown	Unknown	plant biochar leachate	solid phase extraction, FT-ICR-MS	solid phase extraction, FT-ICR-MS	Other	Lignin	Other	Chen et al., 2022; Yan et al., 2022
1134	C16H23N2O3	Unknown	Unknown	plant biochar leachate	solid phase extraction, FT-ICR-MS	solid phase extraction, FT-ICR-MS	Other	Lignin	Other	Chen et al., 2022
1135	C12H6NO8	Unknown	Unknown	plant biochar leachate	solid phase extraction, FT-ICR-MS	solid phase extraction, FT-ICR-MS	Cond Hydrocarbon	Cond Hydrocarbon	Other	Chen et al., 2022; Yan et al., 2022
1136	C16H6NO5	Unknown	Unknown	plant biochar leachate	solid phase extraction, FT-ICR-MS	solid phase extraction, FT-ICR-MS	Cond Hydrocarbon	Cond Hydrocarbon	Other	Chen et al., 2022
1137	C13H10NO7	Unknown	Unknown	plant biochar leachate	solid phase extraction, FT-ICR-MS	solid phase extraction, FT-ICR-MS	Cond Hydrocarbon	Cond Hydrocarbon	Other	Chen et al., 2022; Yan et al., 2022
1138	C16H10N3OS	Unknown	Unknown	plant biochar leachate	solid phase extraction, FT-ICR-MS	solid phase extraction, FT-ICR-MS	Other	Cond Hydrocarbon	Other	Chen et al., 2022
1139	C17H10NO4	Unknown	Unknown	plant biochar leachate	solid phase extraction, FT-ICR-MS	solid phase extraction, FT-ICR-MS	Cond Hydrocarbon	Cond Hydrocarbon	Other	Chen et al., 2022; Yan et al., 2022
1140	C10H14NO9	Unknown	Unknown	plant biochar leachate	solid phase extraction, FT-ICR-MS	solid phase extraction, FT-ICR-MS	Other	Tannin	Other	Chen et al., 2022
1141	C14H14NO6	Unknown	Unknown	plant biochar leachate	solid phase extraction, FT-ICR-MS	solid phase extraction, FT-ICR-MS	Lignin	Lignin	Other	Chen et al., 2022; Yan et al., 2022
1142	C13H14N3O5	Unknown	Unknown	plant biochar leachate	solid phase extraction, FT-ICR-MS	solid phase extraction, FT-ICR-MS	Lignin	Lignin	Protein	Chen et al., 2022
1143	C18H14NO3	Unknown	Unknown	plant biochar leachate	solid phase extraction, FT-ICR-MS	solid phase extraction, FT-ICR-MS	Cond Hydrocarbon	Cond Hydrocarbon	Other	Chen et al., 2022
1144	C15H18NO5	Unknown	Unknown	plant biochar leachate	solid phase extraction, FT-ICR-MS	solid phase extraction, FT-ICR-MS	Lignin	Lignin	Other	Chen et al., 2022; Yan et al., 2022
1145	C14H18N3O4	Unknown	Unknown	plant biochar leachate	solid phase extraction, FT-ICR-MS	solid phase extraction, FT-ICR-MS	Lignin	Lignin	Protein	Chen et al., 2022
1146	C16H22NO4	Unknown	Unknown	plant biochar leachate	solid phase extraction, FT-ICR-MS	solid phase extraction, FT-ICR-MS	Other	Lignin	Other	Chen et al., 2022
1147	C14H30NO5	Unknown	Unknown	plant biochar leachate	solid phase extraction, FT-ICR-MS	solid phase extraction, FT-ICR-MS	Other	Protein	Other	Chen et al., 2022
1148	C12H5O9	Unknown	Unknown	plant biochar leachate	solid phase extraction, FT-ICR-MS	solid phase extraction, FT-ICR-MS	Other	Cond Hydrocarbon	Other	Chen et al., 2022; Yan et al., 2022
1149	C11H5N2O8	Unknown	Unknown	plant biochar leachate	solid phase extraction, FT-ICR-MS	solid phase extraction, FT-ICR-MS	Other	Cond Hydrocarbon	Other	Chen et al., 2022
1150	C16H5O6	Unknown	Unknown	plant biochar leachate	solid phase extraction, FT-ICR-MS	solid phase extraction, FT-ICR-MS	Cond Hydrocarbon	Cond Hydrocarbon	Other	Chen et al., 2022
1151	C13H9O6S	Unknown	Unknown	plant biochar leachate	solid phase extraction, FT-ICR-MS	solid phase extraction, FT-ICR-MS	Cond Hydrocarbon	Cond Hydrocarbon	Other	Chen et al., 2022
1152	C13H9O8	Unknown	Unknown	plant biochar leachate	solid phase extraction, FT-ICR-MS	solid phase extraction, FT-ICR-MS	Cond Hydrocarbon	Cond Hydrocarbon	Other	Chen et al., 2022; Yan et al., 2022
1153	C10H13O8S	Unknown	Unknown	plant biochar leachate	solid phase extraction, FT-ICR-MS	solid phase extraction, FT-ICR-MS	Tannin	Tannin	Other	Chen et al., 2022
1154	C12H9N2O7	Unknown	Unknown	plant biochar leachate	solid phase extraction, FT-ICR-MS	solid phase extraction, FT-ICR-MS	Cond Hydrocarbon	Cond Hydrocarbon	Other	Chen et al., 2022; Yan et al., 2022
1155	C17H9O5	Unknown	Unknown	plant biochar leachate	solid phase extraction, FT-ICR-MS	solid phase extraction, FT-ICR-MS	Cond Hydrocarbon	Cond Hydrocarbon	Other	Chen et al., 2022; Yan et al., 2022
1156	C10H13O10	Unknown	Unknown	plant biochar leachate	solid phase extraction, FT-ICR-MS	solid phase extraction, FT-ICR-MS	Tannin	Tannin	Other	Chen et al., 2022
1157	C14H13O7	Unknown	Unknown	plant biochar leachate	solid phase extraction, FT-ICR-MS	solid phase extraction, FT-ICR-MS	Lignin	Lignin	Other	Chen et al., 2022; Yan et al., 2022
1158	C13H13N2O6	Unknown	Unknown	plant biochar leachate	solid phase extraction, FT-ICR-MS	solid phase extraction, FT-ICR-MS	Lignin	Lignin	Protein	Chen et al., 2022; Yan et al., 2022
1159	C18H13O4	Unknown	Unknown	plant biochar leachate	solid phase extraction, FT-ICR-MS	solid phase extraction, FT-ICR-MS	Cond Hydrocarbon	Cond Hydrocarbon	Other	Chen et al., 2022; Yan et al., 2022
1160	C11H17O9	Unknown	Unknown	plant biochar leachate	solid phase extraction, FT-ICR-MS	solid phase extraction, FT-ICR-MS	Carbohydrate	Carbohydrate	Other	Chen et al., 2022
1161	C17H13N2O3	Unknown	Unknown	plant biochar leachate	solid phase extraction, FT-ICR-MS	solid phase extraction, FT-ICR-MS	Cond Hydrocarbon	Cond Hydrocarbon	Other	Chen et al., 2022
1162	C15H17O6	Unknown	Unknown	plant biochar leachate	solid phase extraction, FT-ICR-MS	solid phase extraction, FT-ICR-MS	Lignin	Lignin	Other	Chen et al., 2022; Yan et al., 2022
1163	C12H21O6S	Unknown	Unknown	plant biochar leachate	solid phase extraction, FT-ICR-MS	solid phase extraction, FT-ICR-MS	Protein	Protein	Other	Chen et al., 2022
1164	C14H17N2O5	Unknown	Unknown	plant biochar leachate	solid phase extraction, FT-ICR-MS	solid phase extraction, FT-ICR-MS	Lignin	Lignin	Protein	Chen et al., 2022
1165	C19H17O3	Unknown	Unknown	plant biochar leachate	solid phase extraction, FT-ICR-MS	solid phase extraction, FT-ICR-MS	Other	Lignin	Other	Chen et al., 2022
1166	C16H21O5	Unknown	Unknown	plant biochar leachate	solid phase extraction, FT-ICR-MS	solid phase extraction, FT-ICR-MS	Lignin	Lignin	Other	Chen et al., 2022; Yan et al., 2022
1167	C15H21N2O4	Unknown	Unknown	plant biochar leachate	solid phase extraction, FT-ICR-MS	solid phase extraction, FT-ICR-MS	Other	Lignin	Protein	Chen et al., 2022
1168	C17H25O4	Unknown	Unknown	plant biochar leachate	solid phase extraction, FT-ICR-MS	solid phase extraction, FT-ICR-MS	Other	Lignin	Other	Chen et al., 2022; Yan et al., 2022
1169	C14H29O4S	Unknown	Unknown	plant biochar leachate	solid phase extraction, FT-ICR-MS	solid phase extraction, FT-ICR-MS	Lipid	Lipid	Other	Chen et al., 2022
1170	C16H25N2O3	Unknown	Unknown	plant biochar leachate	solid phase extraction, FT-ICR-MS	solid phase extraction, FT-ICR-MS	Lipid	Lipid	Other	Chen et al., 2022
1171	C11H4NO9	Unknown	Unknown	plant biochar leachate	solid phase extraction, FT-ICR-MS	solid phase extraction, FT-ICR-MS	Other	Cond Hydrocarbon	Other	Chen et al., 2022
1172	C12H8NO8	Unknown	Unknown	plant biochar leachate	solid phase extraction, FT-ICR-MS	solid phase extraction, FT-ICR-MS	Cond Hydrocarbon	Cond Hydrocarbon	Other	Chen et al., 2022; Yan et al., 2022
1173	C16H8NO5	Unknown	Unknown	plant biochar leachate	solid phase extraction, FT-ICR-MS	solid phase extraction, FT-ICR-MS	Cond Hydrocarbon	Cond Hydrocarbon	Other	Chen et al., 2022; Yan et al., 2022
1174	C9H12NO10	Unknown	Unknown	plant biochar leachate	solid phase extraction, FT-ICR-MS	solid phase extraction, FT-ICR-MS	Other	Other	Other	Chen et al., 2022
1175	C13H12NO7	Unknown	Unknown	plant biochar leachate	solid phase extraction, FT-ICR-MS	solid phase extraction, FT-ICR-MS	Lignin	Lignin	Other	Chen et al., 2022; Yan et al., 2022
1176	C17H12NO4	Unknown	Unknown	plant biochar leachate	solid phase extraction, FT-ICR-MS	solid phase extraction, FT-ICR-MS	Cond Hydrocarbon	Cond Hydrocarbon	Other	Chen et al., 2022; Yan et al., 2022
1177	C14H16NO6	Unknown	Unknown	plant biochar leachate	solid phase extraction, FT-ICR-MS	solid phase extraction, FT-ICR-MS	Lignin	Lignin	Other	Chen et al., 2022; Yan et al., 2022
1178	C13H16N3O5	Unknown	Unknown	plant biochar leachate	solid phase extraction, FT-ICR-MS	solid phase extraction, FT-ICR-MS	Lignin	Lignin	Protein	Chen et al., 2022
1179	C18H16NO3	Unknown	Unknown	plant biochar leachate	solid phase extraction, FT-ICR-MS	solid phase extraction, FT-ICR-MS	Other	Lignin	Other	Chen et al., 2022
1180	C15H20NO5	Unknown	Unknown	plant biochar leachate	solid phase extraction, FT-ICR-MS	solid phase extraction, FT-ICR-MS	Lignin	Lignin	Other	Chen et al., 2022; Yan et al., 2022
1181	C11H3O10	Unknown	Unknown	plant biochar leachate	solid phase extraction, FT-ICR-MS	solid phase extraction, FT-ICR-MS	Other	Cond Hydrocarbon	Other	Chen et al., 2022
1182	C12H7O7S	Unknown	Unknown	plant biochar leachate	solid phase extraction, FT-ICR-MS	solid phase extraction, FT-ICR-MS	Cond Hydrocarbon	Cond Hydrocarbon	Other	Chen et al., 2022
1183	C12H7O9	Unknown	Unknown	plant biochar leachate	solid phase extraction, FT-ICR-MS	solid phase extraction, FT-ICR-MS	Other	Cond Hydrocarbon	Other	Chen et al., 2022; Yan et al., 2022
1184	C16H7O6	Unknown	Unknown	plant biochar leachate	solid phase extraction, FT-ICR-MS	solid phase extraction, FT-ICR-MS	Cond Hydrocarbon	Cond Hydrocarbon	Other	Chen et al., 2022; Yan et al., 2022
1185	C13H11O6S	Unknown	Unknown	plant biochar leachate	solid phase extraction, FT-ICR-MS	solid phase extraction, FT-ICR-MS	Lignin	Lignin	Other	Chen et al., 2022
1186	C13H11O8	Unknown	Unknown	plant biochar leachate	solid phase extraction, FT-ICR-MS	solid phase extraction, FT-ICR-MS	Lignin	Lignin	Other	Chen et al., 2022; Yan et al., 2022
1187	C9H15N2O7S	Unknown	Unknown	plant biochar leachate	solid phase extraction, FT-ICR-MS	solid phase extraction, FT-ICR-MS	Carbohydrate	Carbohydrate	Protein	Chen et al., 2022
1188	C17H11O5	Unknown	Unknown	plant biochar leachate	solid phase extraction, FT-ICR-MS	solid phase extraction, FT-ICR-MS	Cond Hydrocarbon	Cond Hydrocarbon	Other	Chen et al., 2022; Yan et al., 2022
1189	C10H15O10	Unknown	Unknown	plant biochar leachate	solid phase extraction, FT-ICR-MS	solid phase extraction, FT-ICR-MS	Carbohydrate	Carbohydrate	Other	Chen et al., 2022; Goranov et al., 2020
1190	C18H15O2S	Unknown	Unknown	plant biochar leachate	solid phase extraction, FT-ICR-MS	solid phase extraction, FT-ICR-MS	Unsat Hydrocarbon	Unsat Hydrocarbon	Other	Chen et al., 2022
1191	C14H15O7	Unknown	Unknown	plant biochar leachate	solid phase extraction, FT-ICR-MS	solid phase extraction, FT-ICR-MS	Lignin	Lignin	Other	Chen et al., 2022; Yan et al., 2022
1192	C11H19O7S	Unknown	Unknown	plant biochar leachate	solid phase extraction, FT-ICR-MS	solid phase extraction, FT-ICR-MS	Amino Sugar	Amino Sugar	Other	Chen et al., 2022
1193	C13H15N2O6	Unknown	Unknown	plant biochar leachate	solid phase extraction, FT-ICR-MS	solid phase extraction, FT-ICR-MS	Lignin	Lignin	Protein	Chen et al., 2022; Yan et al., 2022
1194	C18H15O4	Unknown	Unknown	plant biochar leachate	solid phase extraction, FT-ICR-MS	solid phase extraction, FT-ICR-MS	Other	Lignin	Other	Chen et al., 2022; Yan et al., 2022
1195	C11H19O9	Unknown	Unknown	plant biochar leachate	solid phase extraction, FT-ICR-MS	solid phase extraction, FT-ICR-MS	Carbohydrate	Carbohydrate	Carbohydrate	Chen et al., 2022
1196	C15H19O6	Unknown	Unknown	plant biochar leachate	solid phase extraction, FT-ICR-MS	solid phase extraction, FT-ICR-MS	Lignin	Lignin	Other	Chen et al., 2022; Yan et al., 2022
1197	C14H19N2O5	Unknown	Unknown	plant biochar leachate	solid phase extraction, FT-ICR-MS	solid phase extraction, FT-ICR-MS	Lignin	Lignin	Protein	Chen et al., 2022
1198	C19H19O3	Unknown	Unknown	plant biochar leachate	solid phase extraction, FT-ICR-MS	solid phase extraction, FT-ICR-MS	Other	Lignin	Other	Chen et al., 2022; Yan et al., 2022
1199	C16H23O5	Unknown	Unknown	plant biochar leachate	solid phase extraction, FT-ICR-MS	solid phase extraction, FT-ICR-MS	Lignin	Lignin	Other	Chen et al., 2022
1200	C15H23N2O4	Unknown	Unknown	plant biochar leachate	solid phase extraction, FT-ICR-MS	solid phase extraction, FT-ICR-MS	Other	Lipid	Protein	Chen et al., 2022
1201	C17H27O4	Unknown	Unknown	plant biochar leachate	solid phase extraction, FT-ICR-MS	solid phase extraction, FT-ICR-MS	Lipid	Lipid	Other	Chen et al., 2022; Yan et al., 2022
1202	C11H6NO7S	Unknown	Unknown	plant biochar leachate	solid phase extraction, FT-ICR-MS	solid phase extraction, FT-ICR-MS	Cond Hydrocarbon	Cond Hydrocarbon	Other	Chen et al., 2022
1203	C11H6NO9	Unknown	Unknown	plant biochar leachate	solid phase extraction, FT-ICR-MS	solid phase extraction, FT-ICR-MS	Other	Cond Hydrocarbon	Other	Chen et al., 2022; Yan et al., 2022
1204	C15H6NO6	Unknown	Unknown	plant biochar leachate	solid phase extraction, FT-ICR-MS	solid phase extraction, FT-ICR-MS	Cond Hydrocarbon	Cond Hydrocarbon	Other	Chen et al., 2022; Yan et al., 2022
1205	C12H10NO6S	Unknown	Unknown	plant biochar leachate	solid phase extraction, FT-ICR-MS	solid phase extraction, FT-ICR-MS	Lignin	Lignin	Other	Chen et al., 2022
1206	C12H10NO8	Unknown	Unknown	plant biochar leachate	solid phase extraction, FT-ICR-MS	solid phase extraction, FT-ICR-MS	Tannin	Tannin	Other	Chen et al., 2022; Yan et al., 2022
1207	C8H14N3O7S	Unknown	Unknown	plant biochar leachate	solid phase extraction, FT-ICR-MS	solid phase extraction, FT-ICR-MS	Carbohydrate	Carbohydrate	Protein	Chen et al., 2022
1208	C16H10NO5	Unknown	Unknown	plant biochar leachate	solid phase extraction, FT-ICR-MS	solid phase extraction, FT-ICR-MS	Cond Hydrocarbon	Cond Hydrocarbon	Other	Chen et al., 2022; Yan et al., 2022
1209	C13H14NO7	Unknown	Unknown	plant biochar leachate	solid phase extraction, FT-ICR-MS	solid phase extraction, FT-ICR-MS	Lignin	Lignin	Other	Chen et al., 2022; Yan et al., 2022
1210	C16H14N3OS	Unknown	Unknown	plant biochar leachate	solid phase extraction, FT-ICR-MS	solid phase extraction, FT-ICR-MS	Unsat Hydrocarbon	Unsat Hydrocarbon	Other	Chen et al., 2022
1211	C17H14NO4	Unknown	Unknown	plant biochar leachate	solid phase extraction, FT-ICR-MS	solid phase extraction, FT-ICR-MS	Other	Lignin	Other	Chen et al., 2022; Yan et al., 2022
1212	C14H18NO6	Unknown	Unknown	plant biochar leachate	solid phase extraction, FT-ICR-MS	solid phase extraction, FT-ICR-MS	Lignin	Lignin	Other	Chen et al., 2022; Yan et al., 2022
1213	C13H18N3O5	Unknown	Unknown	plant biochar leachate	solid phase extraction, FT-ICR-MS	solid phase extraction, FT-ICR-MS	Lignin	Lignin	Protein	Chen et al., 2022
1214	C15H22NO5	Unknown	Unknown	plant biochar leachate	solid phase extraction, FT-ICR-MS	solid phase extraction, FT-ICR-MS	Protein	Lignin	Other	Chen et al., 2022
1215	C11H5O10	Unknown	Unknown	plant biochar leachate	solid phase extraction, FT-ICR-MS	solid phase extraction, FT-ICR-MS	Other	Cond Hydrocarbon	Other	Chen et al., 2022; Yan et al., 2022
1216	C15H5O7	Unknown	Unknown	plant biochar leachate	solid phase extraction, FT-ICR-MS	solid phase extraction, FT-ICR-MS	Cond Hydrocarbon	Cond Hydrocarbon	Other	Chen et al., 2022
1217	C12H9O7S	Unknown	Unknown	plant biochar leachate	solid phase extraction, FT-ICR-MS	solid phase extraction, FT-ICR-MS	Cond Hydrocarbon	Cond Hydrocarbon	Other	Chen et al., 2022
1218	C12H9O9	Unknown	Unknown	plant biochar leachate	solid phase extraction, FT-ICR-MS	solid phase extraction, FT-ICR-MS	Tannin	Cond Hydrocarbon	Other	Chen et al., 2022; Yan et al., 2022
1219	C16H9O6	Unknown	Unknown	plant biochar leachate	solid phase extraction, FT-ICR-MS	solid phase extraction, FT-ICR-MS	Cond Hydrocarbon	Cond Hydrocarbon	Other	Chen et al., 2022; Yan et al., 2022
1220	C13H13O6S	Unknown	Unknown	plant biochar leachate	solid phase extraction, FT-ICR-MS	solid phase extraction, FT-ICR-MS	Lignin	Lignin	Other	Chen et al., 2022
1221	C15H9N2O5	Unknown	Unknown	plant biochar leachate	solid phase extraction, FT-ICR-MS	solid phase extraction, FT-ICR-MS	Cond Hydrocarbon	Cond Hydrocarbon	Other	Chen et al., 2022; Yan et al., 2022
1222	C13H13O8	Unknown	Unknown	plant biochar leachate	solid phase extraction, FT-ICR-MS	solid phase extraction, FT-ICR-MS	Lignin	Lignin	Other	Chen et al., 2022; Yan et al., 2022
1223	C19H9N2O2	Unknown	Unknown	plant biochar leachate	solid phase extraction, FT-ICR-MS	solid phase extraction, FT-ICR-MS	Other	Cond Hydrocarbon	Other	Chen et al., 2022; Yan et al., 2022
1224	C12H13N2O7	Unknown	Unknown	plant biochar leachate	solid phase extraction, FT-ICR-MS	solid phase extraction, FT-ICR-MS	Lignin	Lignin	Protein	Chen et al., 2022
1225	C17H13O5	Unknown	Unknown	plant biochar leachate	solid phase extraction, FT-ICR-MS	solid phase extraction, FT-ICR-MS	Cond Hydrocarbon	Cond Hydrocarbon	Other	Chen et al., 2022; Yan et al., 2022
1226	C18H17O2S	Unknown	Unknown	plant biochar leachate	solid phase extraction, FT-ICR-MS	solid phase extraction, FT-ICR-MS	Unsat Hydrocarbon	Unsat Hydrocarbon	Other	Chen et al., 2022
1227	C14H17O7	Unknown	Unknown	plant biochar leachate	solid phase extraction, FT-ICR-MS	solid phase extraction, FT-ICR-MS	Lignin	Lignin	Other	Chen et al., 2022; Yan et al., 2022
1228	C13H17N2O6	Unknown	Unknown	plant biochar leachate	solid phase extraction, FT-ICR-MS	solid phase extraction, FT-ICR-MS	Lignin	Lignin	Protein	Chen et al., 2022
1229	C10H21N2O6S	Unknown	Unknown	plant biochar leachate	solid phase extraction, FT-ICR-MS	solid phase extraction, FT-ICR-MS	Other	Amino Sugar	Protein	Chen et al., 2022
1230	C18H17O4	Unknown	Unknown	plant biochar leachate	solid phase extraction, FT-ICR-MS	solid phase extraction, FT-ICR-MS	Other	Lignin	Other	Chen et al., 2022; Yan et al., 2022
1231	C17H17N2O3	Unknown	Unknown	plant biochar leachate	solid phase extraction, FT-ICR-MS	solid phase extraction, FT-ICR-MS	Other	Lignin	Other	Chen et al., 2022
1232	C15H21O6	Unknown	Unknown	plant biochar leachate	solid phase extraction, FT-ICR-MS	solid phase extraction, FT-ICR-MS	Lignin	Lignin	Other	Chen et al., 2022; Yan et al., 2022
1233	C14H21N2O5	Unknown	Unknown	plant biochar leachate	solid phase extraction, FT-ICR-MS	solid phase extraction, FT-ICR-MS	Protein	Protein	Protein	Chen et al., 2022
1234	C19H21O3	Unknown	Unknown	plant biochar leachate	solid phase extraction, FT-ICR-MS	solid phase extraction, FT-ICR-MS	Other	Lignin	Other	Chen et al., 2022
1235	C16H25O3S	Unknown	Unknown	plant biochar leachate	solid phase extraction, FT-ICR-MS	solid phase extraction, FT-ICR-MS	Lipid	Lipid	Other	Chen et al., 2022
1236	C16H25O5	Unknown	Unknown	plant biochar leachate	solid phase extraction, FT-ICR-MS	solid phase extraction, FT-ICR-MS	Protein	Protein	Other	Chen et al., 2022
1237	C15H25N2O4	Unknown	Unknown	plant biochar leachate	solid phase extraction, FT-ICR-MS	solid phase extraction, FT-ICR-MS	Lipid	Lipid	Protein	Chen et al., 2022
1238	C17H29O4	Unknown	Unknown	plant biochar leachate	solid phase extraction, FT-ICR-MS	solid phase extraction, FT-ICR-MS	Lipid	Lipid	Other	Chen et al., 2022
1239	C11H8NO9	Unknown	Unknown	plant biochar leachate	solid phase extraction, FT-ICR-MS	solid phase extraction, FT-ICR-MS	Tannin	Cond Hydrocarbon	Other	Chen et al., 2022
1240	C15H8NO6	Unknown	Unknown	plant biochar leachate	solid phase extraction, FT-ICR-MS	solid phase extraction, FT-ICR-MS	Cond Hydrocarbon	Cond Hydrocarbon	Other	Chen et al., 2022; Yan et al., 2022
1241	C12H12NO8	Unknown	Unknown	plant biochar leachate	solid phase extraction, FT-ICR-MS	solid phase extraction, FT-ICR-MS	Tannin	Tannin	Other	Chen et al., 2022
1242	C16H12NO5	Unknown	Unknown	plant biochar leachate	solid phase extraction, FT-ICR-MS	solid phase extraction, FT-ICR-MS	Cond Hydrocarbon	Cond Hydrocarbon	Other	Chen et al., 2022; Yan et al., 2022
1243	C13H16NO7	Unknown	Unknown	plant biochar leachate	solid phase extraction, FT-ICR-MS	solid phase extraction, FT-ICR-MS	Lignin	Lignin	Other	Chen et al., 2022; Yan et al., 2022
1244	C12H16N3O6	Unknown	Unknown	plant biochar leachate	solid phase extraction, FT-ICR-MS	solid phase extraction, FT-ICR-MS	Lignin	Lignin	Protein	Chen et al., 2022
1245	C17H16NO4	Unknown	Unknown	plant biochar leachate	solid phase extraction, FT-ICR-MS	solid phase extraction, FT-ICR-MS	Other	Lignin	Other	Chen et al., 2022; Yan et al., 2022
1246	C14H20NO6	Unknown	Unknown	plant biochar leachate	solid phase extraction, FT-ICR-MS	solid phase extraction, FT-ICR-MS	Lignin	Lignin	Other	Chen et al., 2022
1247	C13H20N3O5	Unknown	Unknown	plant biochar leachate	solid phase extraction, FT-ICR-MS	solid phase extraction, FT-ICR-MS	Protein	Protein	Protein	Chen et al., 2022
1248	C15H24NO5	Unknown	Unknown	plant biochar leachate	solid phase extraction, FT-ICR-MS	solid phase extraction, FT-ICR-MS	Protein	Protein	Other	Chen et al., 2022
1249	C15H28N3O3	Unknown	Unknown	plant biochar leachate	solid phase extraction, FT-ICR-MS	solid phase extraction, FT-ICR-MS	Lipid	Lipid	Protein	Chen et al., 2022
1250	C11H7O8S	Unknown	Unknown	plant biochar leachate	solid phase extraction, FT-ICR-MS	solid phase extraction, FT-ICR-MS	Other	Cond Hydrocarbon	Other	Chen et al., 2022
1251	C11H7O10	Unknown	Unknown	plant biochar leachate	solid phase extraction, FT-ICR-MS	solid phase extraction, FT-ICR-MS	Other	Cond Hydrocarbon	Other	Chen et al., 2022; Yan et al., 2022
1252	C15H7O7	Unknown	Unknown	plant biochar leachate	solid phase extraction, FT-ICR-MS	solid phase extraction, FT-ICR-MS	Cond Hydrocarbon	Cond Hydrocarbon	Other	Chen et al., 2022; Yan et al., 2022
1253	C12H11O7S	Unknown	Unknown	plant biochar leachate	solid phase extraction, FT-ICR-MS	solid phase extraction, FT-ICR-MS	Lignin	Lignin	Other	Chen et al., 2022
1254	C14H7N2O6	Unknown	Unknown	plant biochar leachate	solid phase extraction, FT-ICR-MS	solid phase extraction, FT-ICR-MS	Cond Hydrocarbon	Cond Hydrocarbon	Other	Chen et al., 2022
1255	C12H11O9	Unknown	Unknown	plant biochar leachate	solid phase extraction, FT-ICR-MS	solid phase extraction, FT-ICR-MS	Tannin	Tannin	Other	Chen et al., 2022; Goranov et al., 2020; Yan et al., 2022
1256	C20H11OS	Unknown	Unknown	plant biochar leachate	solid phase extraction, FT-ICR-MS	solid phase extraction, FT-ICR-MS	Other	Cond Hydrocarbon	Other	Chen et al., 2022
1257	C16H11O6	Unknown	Unknown	plant biochar leachate	solid phase extraction, FT-ICR-MS	solid phase extraction, FT-ICR-MS	Cond Hydrocarbon	Cond Hydrocarbon	Other	Chen et al., 2022; Yan et al., 2022
1258	C15H11N2O5	Unknown	Unknown	plant biochar leachate	solid phase extraction, FT-ICR-MS	solid phase extraction, FT-ICR-MS	Cond Hydrocarbon	Cond Hydrocarbon	Other	Chen et al., 2022
1259	C13H15O8	Unknown	Unknown	plant biochar leachate	solid phase extraction, FT-ICR-MS	solid phase extraction, FT-ICR-MS	Lignin	Lignin	Other	Chen et al., 2022; Yan et al., 2022
1260	C12H15N2O7	Unknown	Unknown	plant biochar leachate	solid phase extraction, FT-ICR-MS	solid phase extraction, FT-ICR-MS	Lignin	Lignin	Protein	Chen et al., 2022
1261	C17H15O5	Unknown	Unknown	plant biochar leachate	solid phase extraction, FT-ICR-MS	solid phase extraction, FT-ICR-MS	Lignin	Lignin	Other	Chen et al., 2022; Yan et al., 2022
1262	C16H15N2O4	Unknown	Unknown	plant biochar leachate	solid phase extraction, FT-ICR-MS	solid phase extraction, FT-ICR-MS	Other	Lignin	Other	Chen et al., 2022; Yan et al., 2022
1263	C14H19O7	Unknown	Unknown	plant biochar leachate	solid phase extraction, FT-ICR-MS	solid phase extraction, FT-ICR-MS	Lignin	Lignin	Other	Chen et al., 2022
1264	C13H19N2O6	Unknown	Unknown	plant biochar leachate	solid phase extraction, FT-ICR-MS	solid phase extraction, FT-ICR-MS	Protein	Lignin	Protein	Chen et al., 2022
1265	C18H19O4	Unknown	Unknown	plant biochar leachate	solid phase extraction, FT-ICR-MS	solid phase extraction, FT-ICR-MS	Other	Lignin	Other	Chen et al., 2022; Yan et al., 2022
1266	C17H19N2O3	Unknown	Unknown	plant biochar leachate	solid phase extraction, FT-ICR-MS	solid phase extraction, FT-ICR-MS	Other	Lignin	Other	Chen et al., 2022
1267	C15H23O6	Unknown	Unknown	plant biochar leachate	solid phase extraction, FT-ICR-MS	solid phase extraction, FT-ICR-MS	Protein	Protein	Other	Chen et al., 2022
1268	C14H23N2O5	Unknown	Unknown	plant biochar leachate	solid phase extraction, FT-ICR-MS	solid phase extraction, FT-ICR-MS	Protein	Protein	Protein	Chen et al., 2022
1269	C19H23O3	Unknown	Unknown	plant biochar leachate	solid phase extraction, FT-ICR-MS	solid phase extraction, FT-ICR-MS	Other	Lignin	Other	Chen et al., 2022
1270	C16H27O5	Unknown	Unknown	plant biochar leachate	solid phase extraction, FT-ICR-MS	solid phase extraction, FT-ICR-MS	Protein	Protein	Other	Chen et al., 2022
1271	C15H27N2O4	Unknown	Unknown	plant biochar leachate	solid phase extraction, FT-ICR-MS	solid phase extraction, FT-ICR-MS	Lipid	Lipid	Protein	Chen et al., 2022
1272	C18H39N2O	Unknown	Unknown	plant biochar leachate	solid phase extraction, FT-ICR-MS	solid phase extraction, FT-ICR-MS	Lipid	Lipid;Unsat Hydrocarbon	Other	Chen et al., 2022
1273	C9H6N3O9	Unknown	Unknown	plant biochar leachate	solid phase extraction, FT-ICR-MS	solid phase extraction, FT-ICR-MS	Other	Other	Other	Chen et al., 2022
1274	C14H6NO7	Unknown	Unknown	plant biochar leachate	solid phase extraction, FT-ICR-MS	solid phase extraction, FT-ICR-MS	Cond Hydrocarbon	Cond Hydrocarbon	Other	Chen et al., 2022; Yan et al., 2022
1275	C11H10NO7S	Unknown	Unknown	plant biochar leachate	solid phase extraction, FT-ICR-MS	solid phase extraction, FT-ICR-MS	Lignin	Lignin	Other	Chen et al., 2022
1276	C11H10NO9	Unknown	Unknown	plant biochar leachate	solid phase extraction, FT-ICR-MS	solid phase extraction, FT-ICR-MS	Tannin	Tannin	Other	Chen et al., 2022
1277	C15H10NO6	Unknown	Unknown	plant biochar leachate	solid phase extraction, FT-ICR-MS	solid phase extraction, FT-ICR-MS	Cond Hydrocarbon	Cond Hydrocarbon	Other	Chen et al., 2022; Yan et al., 2022
1278	C12H14NO6S	Unknown	Unknown	plant biochar leachate	solid phase extraction, FT-ICR-MS	solid phase extraction, FT-ICR-MS	Lignin	Lignin	Other	Chen et al., 2022
1279	C12H14NO8	Unknown	Unknown	plant biochar leachate	solid phase extraction, FT-ICR-MS	solid phase extraction, FT-ICR-MS	Tannin	Tannin	Other	Chen et al., 2022
1280	C9H18NO8S	Unknown	Unknown	plant biochar leachate	solid phase extraction, FT-ICR-MS	solid phase extraction, FT-ICR-MS	Carbohydrate	Carbohydrate	Other	Chen et al., 2022
1281	C16H14NO5	Unknown	Unknown	plant biochar leachate	solid phase extraction, FT-ICR-MS	solid phase extraction, FT-ICR-MS	Lignin	Lignin	Other	Chen et al., 2022; Yan et al., 2022
1282	C13H18NO7	Unknown	Unknown	plant biochar leachate	solid phase extraction, FT-ICR-MS	solid phase extraction, FT-ICR-MS	Lignin	Lignin	Other	Chen et al., 2022
1283	C12H18N3O6	Unknown	Unknown	plant biochar leachate	solid phase extraction, FT-ICR-MS	solid phase extraction, FT-ICR-MS	Protein	Protein	Protein	Chen et al., 2022
1284	C17H18NO4	Unknown	Unknown	plant biochar leachate	solid phase extraction, FT-ICR-MS	solid phase extraction, FT-ICR-MS	Other	Lignin	Other	Chen et al., 2022; Yan et al., 2022
1285	C14H22NO6	Unknown	Unknown	plant biochar leachate	solid phase extraction, FT-ICR-MS	solid phase extraction, FT-ICR-MS	Protein	Protein	Other	Chen et al., 2022
1286	C18H22NO3	Unknown	Unknown	plant biochar leachate	solid phase extraction, FT-ICR-MS	solid phase extraction, FT-ICR-MS	Other	Lignin	Other	Chen et al., 2022
1287	C16H34N3O2	Unknown	Unknown	plant biochar leachate	solid phase extraction, FT-ICR-MS	solid phase extraction, FT-ICR-MS	Lipid	Lipid;Unsat Hydrocarbon	Protein	Chen et al., 2022
1288	C14H5O8	Unknown	Unknown	plant biochar leachate	solid phase extraction, FT-ICR-MS	solid phase extraction, FT-ICR-MS	Cond Hydrocarbon	Cond Hydrocarbon	Other	Chen et al., 2022; Yan et al., 2022
1289	C11H9O8S	Unknown	Unknown	plant biochar leachate	solid phase extraction, FT-ICR-MS	solid phase extraction, FT-ICR-MS	Tannin	Tannin	Other	Chen et al., 2022
1290	C11H9O10	Unknown	Unknown	plant biochar leachate	solid phase extraction, FT-ICR-MS	solid phase extraction, FT-ICR-MS	Tannin	Tannin	Other	Chen et al., 2022
1291	C15H9O7	Unknown	Unknown	plant biochar leachate	solid phase extraction, FT-ICR-MS	solid phase extraction, FT-ICR-MS	Cond Hydrocarbon	Cond Hydrocarbon	Other	Chen et al., 2022; Yan et al., 2022
1292	C12H13O7S	Unknown	Unknown	plant biochar leachate	solid phase extraction, FT-ICR-MS	solid phase extraction, FT-ICR-MS	Lignin	Lignin	Other	Chen et al., 2022
1293	C14H9N2O6	Unknown	Unknown	plant biochar leachate	solid phase extraction, FT-ICR-MS	solid phase extraction, FT-ICR-MS	Cond Hydrocarbon	Cond Hydrocarbon	Other	Chen et al., 2022; Yan et al., 2022
1294	C12H13O9	Unknown	Unknown	plant biochar leachate	solid phase extraction, FT-ICR-MS	solid phase extraction, FT-ICR-MS	Tannin	Tannin	Other	Chen et al., 2022; Yan et al., 2022
1295	C11H13N2O8	Unknown	Unknown	plant biochar leachate	solid phase extraction, FT-ICR-MS	solid phase extraction, FT-ICR-MS	Tannin	Tannin	Other	Chen et al., 2022
1296	C16H13O6	Unknown	Unknown	plant biochar leachate	solid phase extraction, FT-ICR-MS	solid phase extraction, FT-ICR-MS	Lignin	Lignin	Other	Chen et al., 2022; Yan et al., 2022
1297	C15H13N2O5	Unknown	Unknown	plant biochar leachate	solid phase extraction, FT-ICR-MS	solid phase extraction, FT-ICR-MS	Lignin	Lignin	Other	Chen et al., 2022; Yan et al., 2022
1298	C13H17O8	Unknown	Unknown	plant biochar leachate	solid phase extraction, FT-ICR-MS	solid phase extraction, FT-ICR-MS	Lignin	Lignin	Other	Chen et al., 2022
1299	C12H17N2O7	Unknown	Unknown	plant biochar leachate	solid phase extraction, FT-ICR-MS	solid phase extraction, FT-ICR-MS	Lignin;Amino Sugar	Lignin	Protein	Chen et al., 2022
1300	C17H17O5	Unknown	Unknown	plant biochar leachate	solid phase extraction, FT-ICR-MS	solid phase extraction, FT-ICR-MS	Lignin	Lignin	Other	Chen et al., 2022; Yan et al., 2022
1301	C16H17N2O4	Unknown	Unknown	plant biochar leachate	solid phase extraction, FT-ICR-MS	solid phase extraction, FT-ICR-MS	Other	Lignin	Other	Chen et al., 2022; Yan et al., 2022
1302	C14H21O7	Unknown	Unknown	plant biochar leachate	solid phase extraction, FT-ICR-MS	solid phase extraction, FT-ICR-MS	Protein	Protein	Other	Chen et al., 2022
1303	C13H21N2O6	Unknown	Unknown	plant biochar leachate	solid phase extraction, FT-ICR-MS	solid phase extraction, FT-ICR-MS	Protein	Protein	Protein	Chen et al., 2022
1304	C18H21O4	Unknown	Unknown	plant biochar leachate	solid phase extraction, FT-ICR-MS	solid phase extraction, FT-ICR-MS	Other	Lignin	Other	Chen et al., 2022
1305	C17H21N2O3	Unknown	Unknown	plant biochar leachate	solid phase extraction, FT-ICR-MS	solid phase extraction, FT-ICR-MS	Other	Lignin	Other	Chen et al., 2022
1306	C15H25O6	Unknown	Unknown	plant biochar leachate	solid phase extraction, FT-ICR-MS	solid phase extraction, FT-ICR-MS	Protein	Protein	Other	Chen et al., 2022; Yan et al., 2022
1307	C14H25N2O5	Unknown	Unknown	plant biochar leachate	solid phase extraction, FT-ICR-MS	solid phase extraction, FT-ICR-MS	Protein	Protein	Protein	Chen et al., 2022
1308	C13H4NO8	Unknown	Unknown	plant biochar leachate	solid phase extraction, FT-ICR-MS	solid phase extraction, FT-ICR-MS	Cond Hydrocarbon	Cond Hydrocarbon	Other	Chen et al., 2022
1309	C14H8NO7	Unknown	Unknown	plant biochar leachate	solid phase extraction, FT-ICR-MS	solid phase extraction, FT-ICR-MS	Cond Hydrocarbon	Cond Hydrocarbon	Other	Chen et al., 2022; Yan et al., 2022
1310	C11H12NO7S	Unknown	Unknown	plant biochar leachate	solid phase extraction, FT-ICR-MS	solid phase extraction, FT-ICR-MS	Lignin	Lignin	Other	Chen et al., 2022
1311	C11H12NO9	Unknown	Unknown	plant biochar leachate	solid phase extraction, FT-ICR-MS	solid phase extraction, FT-ICR-MS	Tannin	Tannin	Other	Chen et al., 2022
1312	C15H12NO6	Unknown	Unknown	plant biochar leachate	solid phase extraction, FT-ICR-MS	solid phase extraction, FT-ICR-MS	Cond Hydrocarbon	Lignin	Other	Chen et al., 2022; Yan et al., 2022
1313	C12H16NO8	Unknown	Unknown	plant biochar leachate	solid phase extraction, FT-ICR-MS	solid phase extraction, FT-ICR-MS	Other	Tannin	Other	Chen et al., 2022
1314	C16H16NO5	Unknown	Unknown	plant biochar leachate	solid phase extraction, FT-ICR-MS	solid phase extraction, FT-ICR-MS	Lignin	Lignin	Other	Chen et al., 2022; Yan et al., 2022
1315	C20H16NO2	Unknown	Unknown	plant biochar leachate	solid phase extraction, FT-ICR-MS	solid phase extraction, FT-ICR-MS	Unsat Hydrocarbon	Unsat Hydrocarbon	Other	Chen et al., 2022
1316	C13H20NO7	Unknown	Unknown	plant biochar leachate	solid phase extraction, FT-ICR-MS	solid phase extraction, FT-ICR-MS	Protein	Protein	Other	Chen et al., 2022
1317	C12H20N3O6	Unknown	Unknown	plant biochar leachate	solid phase extraction, FT-ICR-MS	solid phase extraction, FT-ICR-MS	Protein	Protein	Protein	Chen et al., 2022
1318	C17H20NO4	Unknown	Unknown	plant biochar leachate	solid phase extraction, FT-ICR-MS	solid phase extraction, FT-ICR-MS	Other	Lignin	Other	Chen et al., 2022
1319	C14H24NO6	Unknown	Unknown	plant biochar leachate	solid phase extraction, FT-ICR-MS	solid phase extraction, FT-ICR-MS	Protein	Protein	Other	Chen et al., 2022
1320	C10H7O9S	Unknown	Unknown	plant biochar leachate	solid phase extraction, FT-ICR-MS	solid phase extraction, FT-ICR-MS	Tannin	Cond Hydrocarbon	Other	Chen et al., 2022
1321	C9H7N2O8S	Unknown	Unknown	plant biochar leachate	solid phase extraction, FT-ICR-MS	solid phase extraction, FT-ICR-MS	Tannin	Cond Hydrocarbon	Other	Chen et al., 2022
1322	C14H7O8	Unknown	Unknown	plant biochar leachate	solid phase extraction, FT-ICR-MS	solid phase extraction, FT-ICR-MS	Cond Hydrocarbon	Cond Hydrocarbon	Other	Chen et al., 2022; Yan et al., 2022
1323	C11H11O8S	Unknown	Unknown	plant biochar leachate	solid phase extraction, FT-ICR-MS	solid phase extraction, FT-ICR-MS	Tannin	Tannin	Other	Chen et al., 2022
1324	C13H7N2O7	Unknown	Unknown	plant biochar leachate	solid phase extraction, FT-ICR-MS	solid phase extraction, FT-ICR-MS	Cond Hydrocarbon	Cond Hydrocarbon	Other	Chen et al., 2022
1325	C18H7O5	Unknown	Unknown	plant biochar leachate	solid phase extraction, FT-ICR-MS	solid phase extraction, FT-ICR-MS	Cond Hydrocarbon	Cond Hydrocarbon	Other	Chen et al., 2022
1326	C15H11O5S	Unknown	Unknown	plant biochar leachate	solid phase extraction, FT-ICR-MS	solid phase extraction, FT-ICR-MS	Cond Hydrocarbon	Cond Hydrocarbon	Other	Chen et al., 2022
1327	C11H11O10	Unknown	Unknown	plant biochar leachate	solid phase extraction, FT-ICR-MS	solid phase extraction, FT-ICR-MS	Tannin	Tannin	Other	Chen et al., 2022
1328	C22H7O2	Unknown	Unknown	plant biochar leachate	solid phase extraction, FT-ICR-MS	solid phase extraction, FT-ICR-MS	Other	Cond Hydrocarbon	Other	Chen et al., 2022
1329	C15H11O7	Unknown	Unknown	plant biochar leachate	solid phase extraction, FT-ICR-MS	solid phase extraction, FT-ICR-MS	Cond Hydrocarbon	Cond Hydrocarbon	Other	Chen et al., 2022; Yan et al., 2022
1330	C12H15O7S	Unknown	Unknown	plant biochar leachate	solid phase extraction, FT-ICR-MS	solid phase extraction, FT-ICR-MS	Lignin	Lignin	Other	Chen et al., 2022
1331	C14H11N2O6	Unknown	Unknown	plant biochar leachate	solid phase extraction, FT-ICR-MS	solid phase extraction, FT-ICR-MS	Cond Hydrocarbon	Cond Hydrocarbon	Other	Chen et al., 2022; Yan et al., 2022
1332	C19H11O4	Unknown	Unknown	plant biochar leachate	solid phase extraction, FT-ICR-MS	solid phase extraction, FT-ICR-MS	Cond Hydrocarbon	Cond Hydrocarbon	Other	Chen et al., 2022
1333	C12H15O9	Unknown	Unknown	plant biochar leachate	solid phase extraction, FT-ICR-MS	solid phase extraction, FT-ICR-MS	Tannin	Tannin	Other	Chen et al., 2022
1334	C16H15O6	Unknown	Unknown	plant biochar leachate	solid phase extraction, FT-ICR-MS	solid phase extraction, FT-ICR-MS	Lignin	Lignin	Other	Chen et al., 2022; Goranov et al., 2020; Yan et al., 2022
1335	C15H15N2O5	Unknown	Unknown	plant biochar leachate	solid phase extraction, FT-ICR-MS	solid phase extraction, FT-ICR-MS	Lignin	Lignin	Protein	Chen et al., 2022; Yan et al., 2022
1336	C20H15O3	Unknown	Unknown	plant biochar leachate	solid phase extraction, FT-ICR-MS	solid phase extraction, FT-ICR-MS	Unsat Hydrocarbon;Cond Hydrocarbon	Cond Hydrocarbon	Other	Chen et al., 2022
1337	C13H19O8	Unknown	Unknown	plant biochar leachate	solid phase extraction, FT-ICR-MS	solid phase extraction, FT-ICR-MS	Amino Sugar	Lignin	Other	Chen et al., 2022
1338	C12H19N2O7	Unknown	Unknown	plant biochar leachate	solid phase extraction, FT-ICR-MS	solid phase extraction, FT-ICR-MS	Amino Sugar	Amino Sugar	Protein	Chen et al., 2022
1339	C17H19O5	Unknown	Unknown	plant biochar leachate	solid phase extraction, FT-ICR-MS	solid phase extraction, FT-ICR-MS	Lignin	Lignin	Other	Chen et al., 2022; Yan et al., 2022
1340	C16H19N2O4	Unknown	Unknown	plant biochar leachate	solid phase extraction, FT-ICR-MS	solid phase extraction, FT-ICR-MS	Other	Lignin	Other	Chen et al., 2022
1341	C14H23O7	Unknown	Unknown	plant biochar leachate	solid phase extraction, FT-ICR-MS	solid phase extraction, FT-ICR-MS	Protein	Protein	Other	Chen et al., 2022
1342	C13H23N2O6	Unknown	Unknown	plant biochar leachate	solid phase extraction, FT-ICR-MS	solid phase extraction, FT-ICR-MS	Protein	Protein	Protein	Chen et al., 2022
1343	C18H23O4	Unknown	Unknown	plant biochar leachate	solid phase extraction, FT-ICR-MS	solid phase extraction, FT-ICR-MS	Other	Lignin	Other	Chen et al., 2022
1344	C17H23N2O3	Unknown	Unknown	plant biochar leachate	solid phase extraction, FT-ICR-MS	solid phase extraction, FT-ICR-MS	Other	Lignin	Other	Chen et al., 2022
1345	C13H6NO8	Unknown	Unknown	plant biochar leachate	solid phase extraction, FT-ICR-MS	solid phase extraction, FT-ICR-MS	Cond Hydrocarbon	Cond Hydrocarbon	Other	Chen et al., 2022; Yan et al., 2022
1346	C14H10NO7	Unknown	Unknown	plant biochar leachate	solid phase extraction, FT-ICR-MS	solid phase extraction, FT-ICR-MS	Cond Hydrocarbon	Cond Hydrocarbon	Other	Chen et al., 2022; Yan et al., 2022
1347	C18H10NO4	Unknown	Unknown	plant biochar leachate	solid phase extraction, FT-ICR-MS	solid phase extraction, FT-ICR-MS	Cond Hydrocarbon	Cond Hydrocarbon	Other	Chen et al., 2022
1348	C11H14NO9	Unknown	Unknown	plant biochar leachate	solid phase extraction, FT-ICR-MS	solid phase extraction, FT-ICR-MS	Tannin	Tannin	Other	Chen et al., 2022
1349	C15H14NO6	Unknown	Unknown	plant biochar leachate	solid phase extraction, FT-ICR-MS	solid phase extraction, FT-ICR-MS	Lignin	Lignin	Other	Chen et al., 2022; Yan et al., 2022
1350	C14H14N3O5	Unknown	Unknown	plant biochar leachate	solid phase extraction, FT-ICR-MS	solid phase extraction, FT-ICR-MS	Lignin	Lignin	Protein	Chen et al., 2022
1351	C11H18N3O5S	Unknown	Unknown	plant biochar leachate	solid phase extraction, FT-ICR-MS	solid phase extraction, FT-ICR-MS	Protein	Protein	Protein	Chen et al., 2022
1352	C12H18NO8	Unknown	Unknown	plant biochar leachate	solid phase extraction, FT-ICR-MS	solid phase extraction, FT-ICR-MS	Amino Sugar	Amino Sugar	Other	Chen et al., 2022
1353	C16H18NO5	Unknown	Unknown	plant biochar leachate	solid phase extraction, FT-ICR-MS	solid phase extraction, FT-ICR-MS	Lignin	Lignin	Other	Chen et al., 2022; Yan et al., 2022
1354	C15H18N3O4	Unknown	Unknown	plant biochar leachate	solid phase extraction, FT-ICR-MS	solid phase extraction, FT-ICR-MS	Other	Lignin	Protein	Chen et al., 2022
1355	C13H22NO7	Unknown	Unknown	plant biochar leachate	solid phase extraction, FT-ICR-MS	solid phase extraction, FT-ICR-MS	Protein	Protein	Other	Chen et al., 2022
1356	C17H22NO4	Unknown	Unknown	plant biochar leachate	solid phase extraction, FT-ICR-MS	solid phase extraction, FT-ICR-MS	Other	Lignin	Other	Chen et al., 2022
1357	C13H5O9	Unknown	Unknown	plant biochar leachate	solid phase extraction, FT-ICR-MS	solid phase extraction, FT-ICR-MS	Cond Hydrocarbon	Cond Hydrocarbon	Other	Chen et al., 2022; Yan et al., 2022
1358	C10H9O9S	Unknown	Unknown	plant biochar leachate	solid phase extraction, FT-ICR-MS	solid phase extraction, FT-ICR-MS	Tannin	Tannin	Other	Chen et al., 2022
1359	C14H9O6S	Unknown	Unknown	plant biochar leachate	solid phase extraction, FT-ICR-MS	solid phase extraction, FT-ICR-MS	Cond Hydrocarbon	Cond Hydrocarbon	Other	Chen et al., 2022
1360	C14H9O8	Unknown	Unknown	plant biochar leachate	solid phase extraction, FT-ICR-MS	solid phase extraction, FT-ICR-MS	Cond Hydrocarbon	Cond Hydrocarbon	Other	Chen et al., 2022; Goranov et al., 2020; Yan et al., 2022
1361	C11H13O8S	Unknown	Unknown	plant biochar leachate	solid phase extraction, FT-ICR-MS	solid phase extraction, FT-ICR-MS	Tannin	Tannin	Other	Chen et al., 2022
1362	C13H9N2O7	Unknown	Unknown	plant biochar leachate	solid phase extraction, FT-ICR-MS	solid phase extraction, FT-ICR-MS	Cond Hydrocarbon	Cond Hydrocarbon	Other	Chen et al., 2022; Yan et al., 2022
1363	C18H9O5	Unknown	Unknown	plant biochar leachate	solid phase extraction, FT-ICR-MS	solid phase extraction, FT-ICR-MS	Cond Hydrocarbon	Cond Hydrocarbon	Other	Chen et al., 2022; Yan et al., 2022
1364	C11H13O10	Unknown	Unknown	plant biochar leachate	solid phase extraction, FT-ICR-MS	solid phase extraction, FT-ICR-MS	Tannin	Tannin	Other	Chen et al., 2022; Goranov et al., 2020
1365	C15H13O7	Unknown	Unknown	plant biochar leachate	solid phase extraction, FT-ICR-MS	solid phase extraction, FT-ICR-MS	Lignin	Lignin	Other	Chen et al., 2022; Goranov et al., 2020; Yan et al., 2022
1366	C12H17O7S	Unknown	Unknown	plant biochar leachate	solid phase extraction, FT-ICR-MS	solid phase extraction, FT-ICR-MS	Lignin;Amino Sugar	Lignin	Other	Chen et al., 2022
1367	C14H13N2O6	Unknown	Unknown	plant biochar leachate	solid phase extraction, FT-ICR-MS	solid phase extraction, FT-ICR-MS	Lignin	Lignin	Protein	Chen et al., 2022; Yan et al., 2022
1368	C19H13O4	Unknown	Unknown	plant biochar leachate	solid phase extraction, FT-ICR-MS	solid phase extraction, FT-ICR-MS	Cond Hydrocarbon	Cond Hydrocarbon	Other	Chen et al., 2022; Yan et al., 2022
1369	C12H17O9	Unknown	Unknown	plant biochar leachate	solid phase extraction, FT-ICR-MS	solid phase extraction, FT-ICR-MS	Other	Tannin	Other	Chen et al., 2022
1370	C16H17O6	Unknown	Unknown	plant biochar leachate	solid phase extraction, FT-ICR-MS	solid phase extraction, FT-ICR-MS	Lignin	Lignin	Other	Chen et al., 2022; Yan et al., 2022
1371	C15H17N2O5	Unknown	Unknown	plant biochar leachate	solid phase extraction, FT-ICR-MS	solid phase extraction, FT-ICR-MS	Lignin	Lignin	Protein	Chen et al., 2022; Yan et al., 2022
1372	C20H17O3	Unknown	Unknown	plant biochar leachate	solid phase extraction, FT-ICR-MS	solid phase extraction, FT-ICR-MS	Unsat Hydrocarbon	Lignin	Other	Chen et al., 2022
1373	C13H21O8	Unknown	Unknown	plant biochar leachate	solid phase extraction, FT-ICR-MS	solid phase extraction, FT-ICR-MS	Amino Sugar	Amino Sugar	Other	Chen et al., 2022
1374	C17H21O5	Unknown	Unknown	plant biochar leachate	solid phase extraction, FT-ICR-MS	solid phase extraction, FT-ICR-MS	Lignin	Lignin	Other	Chen et al., 2022
1375	C16H21N2O4	Unknown	Unknown	plant biochar leachate	solid phase extraction, FT-ICR-MS	solid phase extraction, FT-ICR-MS	Other	Lignin	Other	Chen et al., 2022
1376	C18H25O4	Unknown	Unknown	plant biochar leachate	solid phase extraction, FT-ICR-MS	solid phase extraction, FT-ICR-MS	Other	Lignin	Other	Chen et al., 2022
1377	C16H33O5	Unknown	Unknown	plant biochar leachate	solid phase extraction, FT-ICR-MS	solid phase extraction, FT-ICR-MS	Other	Protein	Other	Chen et al., 2022
1378	C12H4NO9	Unknown	Unknown	plant biochar leachate	solid phase extraction, FT-ICR-MS	solid phase extraction, FT-ICR-MS	Other	Cond Hydrocarbon	Other	Chen et al., 2022
1379	C13H8NO8	Unknown	Unknown	plant biochar leachate	solid phase extraction, FT-ICR-MS	solid phase extraction, FT-ICR-MS	Cond Hydrocarbon	Cond Hydrocarbon	Other	Chen et al., 2022; Yan et al., 2022
1380	C17H8NO5	Unknown	Unknown	plant biochar leachate	solid phase extraction, FT-ICR-MS	solid phase extraction, FT-ICR-MS	Cond Hydrocarbon	Cond Hydrocarbon	Other	Chen et al., 2022; Yan et al., 2022
1381	C14H12NO7	Unknown	Unknown	plant biochar leachate	solid phase extraction, FT-ICR-MS	solid phase extraction, FT-ICR-MS	Lignin	Lignin	Other	Chen et al., 2022; Yan et al., 2022
1382	C11H16NO7S	Unknown	Unknown	plant biochar leachate	solid phase extraction, FT-ICR-MS	solid phase extraction, FT-ICR-MS	Amino Sugar	Lignin	Other	Chen et al., 2022
1383	C18H12NO4	Unknown	Unknown	plant biochar leachate	solid phase extraction, FT-ICR-MS	solid phase extraction, FT-ICR-MS	Cond Hydrocarbon	Cond Hydrocarbon	Other	Chen et al., 2022; Yan et al., 2022
1384	C11H16NO9	Unknown	Unknown	plant biochar leachate	solid phase extraction, FT-ICR-MS	solid phase extraction, FT-ICR-MS	Other	Tannin	Other	Chen et al., 2022
1385	C15H16NO6	Unknown	Unknown	plant biochar leachate	solid phase extraction, FT-ICR-MS	solid phase extraction, FT-ICR-MS	Lignin	Lignin	Other	Chen et al., 2022; Yan et al., 2022
1386	C14H16N3O5	Unknown	Unknown	plant biochar leachate	solid phase extraction, FT-ICR-MS	solid phase extraction, FT-ICR-MS	Lignin	Lignin	Protein	Chen et al., 2022; Yan et al., 2022
1387	C19H16NO3	Unknown	Unknown	plant biochar leachate	solid phase extraction, FT-ICR-MS	solid phase extraction, FT-ICR-MS	Other	Lignin	Other	Chen et al., 2022
1388	C16H20NO5	Unknown	Unknown	plant biochar leachate	solid phase extraction, FT-ICR-MS	solid phase extraction, FT-ICR-MS	Lignin	Lignin	Other	Chen et al., 2022
1389	C15H20N3O4	Unknown	Unknown	plant biochar leachate	solid phase extraction, FT-ICR-MS	solid phase extraction, FT-ICR-MS	Other	Lignin	Protein	Chen et al., 2022
1390	C17H24NO4	Unknown	Unknown	plant biochar leachate	solid phase extraction, FT-ICR-MS	solid phase extraction, FT-ICR-MS	Other	Lignin	Other	Chen et al., 2022
1391	C13H7O7S	Unknown	Unknown	plant biochar leachate	solid phase extraction, FT-ICR-MS	solid phase extraction, FT-ICR-MS	Cond Hydrocarbon	Cond Hydrocarbon	Other	Chen et al., 2022
1392	C13H7O9	Unknown	Unknown	plant biochar leachate	solid phase extraction, FT-ICR-MS	solid phase extraction, FT-ICR-MS	Cond Hydrocarbon	Cond Hydrocarbon	Other	Chen et al., 2022; Yan et al., 2022
1393	C10H11O9S	Unknown	Unknown	plant biochar leachate	solid phase extraction, FT-ICR-MS	solid phase extraction, FT-ICR-MS	Tannin	Tannin	Other	Chen et al., 2022
1394	C16H7N2O3S	Unknown	Unknown	plant biochar leachate	solid phase extraction, FT-ICR-MS	solid phase extraction, FT-ICR-MS	Cond Hydrocarbon	Cond Hydrocarbon	Other	Chen et al., 2022
1395	C12H7N2O8	Unknown	Unknown	plant biochar leachate	solid phase extraction, FT-ICR-MS	solid phase extraction, FT-ICR-MS	Cond Hydrocarbon	Cond Hydrocarbon	Other	Chen et al., 2022
1396	C21H7OS	Unknown	Unknown	plant biochar leachate	solid phase extraction, FT-ICR-MS	solid phase extraction, FT-ICR-MS	Other	Cond Hydrocarbon	Other	Chen et al., 2022
1397	C17H7O6	Unknown	Unknown	plant biochar leachate	solid phase extraction, FT-ICR-MS	solid phase extraction, FT-ICR-MS	Cond Hydrocarbon	Cond Hydrocarbon	Other	Chen et al., 2022; Yan et al., 2022
1398	C16H7N2O5	Unknown	Unknown	plant biochar leachate	solid phase extraction, FT-ICR-MS	solid phase extraction, FT-ICR-MS	Cond Hydrocarbon	Cond Hydrocarbon	Other	Chen et al., 2022
1399	C14H11O8	Unknown	Unknown	plant biochar leachate	solid phase extraction, FT-ICR-MS	solid phase extraction, FT-ICR-MS	Cond Hydrocarbon	Cond Hydrocarbon	Other	Chen et al., 2022; Yan et al., 2022
1400	C11H15O8S	Unknown	Unknown	plant biochar leachate	solid phase extraction, FT-ICR-MS	solid phase extraction, FT-ICR-MS	Other	Tannin	Other	Chen et al., 2022
1401	C20H7N2O2	Unknown	Unknown	plant biochar leachate	solid phase extraction, FT-ICR-MS	solid phase extraction, FT-ICR-MS	Other	Cond Hydrocarbon	Other	Chen et al., 2022
1402	C13H11N2O7	Unknown	Unknown	plant biochar leachate	solid phase extraction, FT-ICR-MS	solid phase extraction, FT-ICR-MS	Lignin	Lignin	Other	Chen et al., 2022; Yan et al., 2022
1403	C18H11O5	Unknown	Unknown	plant biochar leachate	solid phase extraction, FT-ICR-MS	solid phase extraction, FT-ICR-MS	Cond Hydrocarbon	Cond Hydrocarbon	Other	Chen et al., 2022; Yan et al., 2022
1404	C11H15O10	Unknown	Unknown	plant biochar leachate	solid phase extraction, FT-ICR-MS	solid phase extraction, FT-ICR-MS	Other	Tannin	Other	Chen et al., 2022
1405	C10H15N2O9	Unknown	Unknown	plant biochar leachate	solid phase extraction, FT-ICR-MS	solid phase extraction, FT-ICR-MS	Carbohydrate	Carbohydrate	Other	Chen et al., 2022
1406	C15H15O7	Unknown	Unknown	plant biochar leachate	solid phase extraction, FT-ICR-MS	solid phase extraction, FT-ICR-MS	Lignin	Lignin	Other	Chen et al., 2022; Yan et al., 2022
1407	C14H15N2O6	Unknown	Unknown	plant biochar leachate	solid phase extraction, FT-ICR-MS	solid phase extraction, FT-ICR-MS	Lignin	Lignin	Protein	Chen et al., 2022; Yan et al., 2022
1408	C11H19N2O6S	Unknown	Unknown	plant biochar leachate	solid phase extraction, FT-ICR-MS	solid phase extraction, FT-ICR-MS	Protein;Amino Sugar	Protein	Protein	Chen et al., 2022
1409	C19H15O4	Unknown	Unknown	plant biochar leachate	solid phase extraction, FT-ICR-MS	solid phase extraction, FT-ICR-MS	Cond Hydrocarbon	Cond Hydrocarbon	Other	Chen et al., 2022; Yan et al., 2022
1410	C12H19O9	Unknown	Unknown	plant biochar leachate	solid phase extraction, FT-ICR-MS	solid phase extraction, FT-ICR-MS	Carbohydrate	Carbohydrate	Other	Chen et al., 2022
1411	C16H19O6	Unknown	Unknown	plant biochar leachate	solid phase extraction, FT-ICR-MS	solid phase extraction, FT-ICR-MS	Lignin	Lignin	Other	Chen et al., 2022; Yan et al., 2022
1412	C15H19N2O5	Unknown	Unknown	plant biochar leachate	solid phase extraction, FT-ICR-MS	solid phase extraction, FT-ICR-MS	Lignin	Lignin	Protein	Chen et al., 2022
1413	C17H23O5	Unknown	Unknown	plant biochar leachate	solid phase extraction, FT-ICR-MS	solid phase extraction, FT-ICR-MS	Lignin	Lignin	Other	Chen et al., 2022; Yan et al., 2022
1414	C16H23N2O4	Unknown	Unknown	plant biochar leachate	solid phase extraction, FT-ICR-MS	solid phase extraction, FT-ICR-MS	Other	Lignin	Other	Chen et al., 2022
1415	C18H27O4	Unknown	Unknown	plant biochar leachate	solid phase extraction, FT-ICR-MS	solid phase extraction, FT-ICR-MS	Other	Lipid	Other	Chen et al., 2022; Yan et al., 2022
1416	C12H6NO9	Unknown	Unknown	plant biochar leachate	solid phase extraction, FT-ICR-MS	solid phase extraction, FT-ICR-MS	Other	Cond Hydrocarbon	Other	Chen et al., 2022; Yan et al., 2022
1417	C16H6NO6	Unknown	Unknown	plant biochar leachate	solid phase extraction, FT-ICR-MS	solid phase extraction, FT-ICR-MS	Cond Hydrocarbon	Cond Hydrocarbon	Other	Chen et al., 2022; Yan et al., 2022
1418	C13H10NO8	Unknown	Unknown	plant biochar leachate	solid phase extraction, FT-ICR-MS	solid phase extraction, FT-ICR-MS	Cond Hydrocarbon	Cond Hydrocarbon	Other	Chen et al., 2022; Yan et al., 2022
1419	C17H10NO5	Unknown	Unknown	plant biochar leachate	solid phase extraction, FT-ICR-MS	solid phase extraction, FT-ICR-MS	Cond Hydrocarbon	Cond Hydrocarbon	Other	Chen et al., 2022; Yan et al., 2022
1420	C14H14NO7	Unknown	Unknown	plant biochar leachate	solid phase extraction, FT-ICR-MS	solid phase extraction, FT-ICR-MS	Lignin	Lignin	Other	Chen et al., 2022; Yan et al., 2022
1421	C11H18NO7S	Unknown	Unknown	plant biochar leachate	solid phase extraction, FT-ICR-MS	solid phase extraction, FT-ICR-MS	Amino Sugar	Amino Sugar	Other	Chen et al., 2022
1422	C13H14N3O6	Unknown	Unknown	plant biochar leachate	solid phase extraction, FT-ICR-MS	solid phase extraction, FT-ICR-MS	Lignin	Lignin	Protein	Chen et al., 2022
1423	C18H14NO4	Unknown	Unknown	plant biochar leachate	solid phase extraction, FT-ICR-MS	solid phase extraction, FT-ICR-MS	Cond Hydrocarbon	Cond Hydrocarbon	Other	Chen et al., 2022
1424	C17H14N3O3	Unknown	Unknown	plant biochar leachate	solid phase extraction, FT-ICR-MS	solid phase extraction, FT-ICR-MS	Other	Lignin	Other	Chen et al., 2022
1425	C15H18NO6	Unknown	Unknown	plant biochar leachate	solid phase extraction, FT-ICR-MS	solid phase extraction, FT-ICR-MS	Lignin	Lignin	Other	Chen et al., 2022; Yan et al., 2022
1426	C12H22NO6S	Unknown	Unknown	plant biochar leachate	solid phase extraction, FT-ICR-MS	solid phase extraction, FT-ICR-MS	Protein	Protein	Other	Chen et al., 2022
1427	C14H18N3O5	Unknown	Unknown	plant biochar leachate	solid phase extraction, FT-ICR-MS	solid phase extraction, FT-ICR-MS	Lignin	Lignin	Protein	Chen et al., 2022
1428	C19H18NO3	Unknown	Unknown	plant biochar leachate	solid phase extraction, FT-ICR-MS	solid phase extraction, FT-ICR-MS	Other	Lignin	Other	Chen et al., 2022
1429	C16H22NO5	Unknown	Unknown	plant biochar leachate	solid phase extraction, FT-ICR-MS	solid phase extraction, FT-ICR-MS	Lignin	Lignin	Other	Chen et al., 2022
1430	C17H26NO4	Unknown	Unknown	plant biochar leachate	solid phase extraction, FT-ICR-MS	solid phase extraction, FT-ICR-MS	Other	Lipid	Other	Chen et al., 2022
1431	C18H34N3O	Unknown	Unknown	plant biochar leachate	solid phase extraction, FT-ICR-MS	solid phase extraction, FT-ICR-MS	Lipid	Lipid;Unsat Hydrocarbon	Other	Chen et al., 2022
1432	C12H5O8S	Unknown	Unknown	plant biochar leachate	solid phase extraction, FT-ICR-MS	solid phase extraction, FT-ICR-MS	Cond Hydrocarbon	Cond Hydrocarbon	Other	Chen et al., 2022
1433	C12H5O10	Unknown	Unknown	plant biochar leachate	solid phase extraction, FT-ICR-MS	solid phase extraction, FT-ICR-MS	Other	Cond Hydrocarbon	Other	Chen et al., 2022; Yan et al., 2022
1434	C8H9N2O9S	Unknown	Unknown	plant biochar leachate	solid phase extraction, FT-ICR-MS	solid phase extraction, FT-ICR-MS	Other	Other	Other	Chen et al., 2022
1435	C16H5O7	Unknown	Unknown	plant biochar leachate	solid phase extraction, FT-ICR-MS	solid phase extraction, FT-ICR-MS	Cond Hydrocarbon	Cond Hydrocarbon	Other	Chen et al., 2022
1436	C13H9O7S	Unknown	Unknown	plant biochar leachate	solid phase extraction, FT-ICR-MS	solid phase extraction, FT-ICR-MS	Cond Hydrocarbon	Cond Hydrocarbon	Other	Chen et al., 2022
1437	C13H9O9	Unknown	Unknown	plant biochar leachate	solid phase extraction, FT-ICR-MS	solid phase extraction, FT-ICR-MS	Cond Hydrocarbon	Cond Hydrocarbon	Other	Chen et al., 2022; Yan et al., 2022
1438	C17H9O6	Unknown	Unknown	plant biochar leachate	solid phase extraction, FT-ICR-MS	solid phase extraction, FT-ICR-MS	Cond Hydrocarbon	Cond Hydrocarbon	Other	Chen et al., 2022; Yan et al., 2022
1439	C14H13O8	Unknown	Unknown	plant biochar leachate	solid phase extraction, FT-ICR-MS	solid phase extraction, FT-ICR-MS	Lignin	Lignin	Other	Chen et al., 2022; Yan et al., 2022
1440	C11H17O8S	Unknown	Unknown	plant biochar leachate	solid phase extraction, FT-ICR-MS	solid phase extraction, FT-ICR-MS	Carbohydrate	Carbohydrate	Other	Chen et al., 2022
1441	C13H13N2O7	Unknown	Unknown	plant biochar leachate	solid phase extraction, FT-ICR-MS	solid phase extraction, FT-ICR-MS	Lignin	Lignin	Protein	Chen et al., 2022
1442	C18H13O5	Unknown	Unknown	plant biochar leachate	solid phase extraction, FT-ICR-MS	solid phase extraction, FT-ICR-MS	Cond Hydrocarbon	Cond Hydrocarbon	Other	Chen et al., 2022; Yan et al., 2022
1443	C11H17O10	Unknown	Unknown	plant biochar leachate	solid phase extraction, FT-ICR-MS	solid phase extraction, FT-ICR-MS	Carbohydrate	Carbohydrate	Other	Chen et al., 2022
1444	C15H17O7	Unknown	Unknown	plant biochar leachate	solid phase extraction, FT-ICR-MS	solid phase extraction, FT-ICR-MS	Lignin	Lignin	Other	Chen et al., 2022; Yan et al., 2022
1445	C12H21O7S	Unknown	Unknown	plant biochar leachate	solid phase extraction, FT-ICR-MS	solid phase extraction, FT-ICR-MS	Amino Sugar	Amino Sugar	Other	Chen et al., 2022
1446	C14H17N2O6	Unknown	Unknown	plant biochar leachate	solid phase extraction, FT-ICR-MS	solid phase extraction, FT-ICR-MS	Lignin	Lignin	Protein	Chen et al., 2022
1447	C19H17O4	Unknown	Unknown	plant biochar leachate	solid phase extraction, FT-ICR-MS	solid phase extraction, FT-ICR-MS	Other	Lignin	Other	Chen et al., 2022; Yan et al., 2022
1448	C12H21O9	Unknown	Unknown	plant biochar leachate	solid phase extraction, FT-ICR-MS	solid phase extraction, FT-ICR-MS	Carbohydrate	Carbohydrate	Other	Chen et al., 2022
1449	C18H17N2O3	Unknown	Unknown	plant biochar leachate	solid phase extraction, FT-ICR-MS	solid phase extraction, FT-ICR-MS	Other	Lignin	Other	Chen et al., 2022
1450	C16H21O6	Unknown	Unknown	plant biochar leachate	solid phase extraction, FT-ICR-MS	solid phase extraction, FT-ICR-MS	Lignin	Lignin	Other	Chen et al., 2022; Yan et al., 2022
1451	C15H21N2O5	Unknown	Unknown	plant biochar leachate	solid phase extraction, FT-ICR-MS	solid phase extraction, FT-ICR-MS	Lignin	Lignin	Protein	Chen et al., 2022
1452	C20H21O3	Unknown	Unknown	plant biochar leachate	solid phase extraction, FT-ICR-MS	solid phase extraction, FT-ICR-MS	Unsat Hydrocarbon	Lignin	Other	Chen et al., 2022
1453	C17H25O5	Unknown	Unknown	plant biochar leachate	solid phase extraction, FT-ICR-MS	solid phase extraction, FT-ICR-MS	Other	Lignin	Other	Chen et al., 2022; Yan et al., 2022
1454	C14H29O5S	Unknown	Unknown	plant biochar leachate	solid phase extraction, FT-ICR-MS	solid phase extraction, FT-ICR-MS	Other	Protein	Other	Chen et al., 2022
1455	C16H25N2O4	Unknown	Unknown	plant biochar leachate	solid phase extraction, FT-ICR-MS	solid phase extraction, FT-ICR-MS	Lipid	Lipid	Other	Chen et al., 2022
1456	C18H29O4	Unknown	Unknown	plant biochar leachate	solid phase extraction, FT-ICR-MS	solid phase extraction, FT-ICR-MS	Lipid	Lipid	Other	Chen et al., 2022
1457	C12H8NO9	Unknown	Unknown	plant biochar leachate	solid phase extraction, FT-ICR-MS	solid phase extraction, FT-ICR-MS	Other	Cond Hydrocarbon	Other	Chen et al., 2022; Yan et al., 2022
1458	C16H8NO6	Unknown	Unknown	plant biochar leachate	solid phase extraction, FT-ICR-MS	solid phase extraction, FT-ICR-MS	Cond Hydrocarbon	Cond Hydrocarbon	Other	Chen et al., 2022; Yan et al., 2022
1459	C13H12NO6S	Unknown	Unknown	plant biochar leachate	solid phase extraction, FT-ICR-MS	solid phase extraction, FT-ICR-MS	Lignin	Lignin	Other	Chen et al., 2022
1460	C13H12NO8	Unknown	Unknown	plant biochar leachate	solid phase extraction, FT-ICR-MS	solid phase extraction, FT-ICR-MS	Lignin	Lignin	Other	Chen et al., 2022; Yan et al., 2022
1461	C17H12NO5	Unknown	Unknown	plant biochar leachate	solid phase extraction, FT-ICR-MS	solid phase extraction, FT-ICR-MS	Cond Hydrocarbon	Cond Hydrocarbon	Other	Chen et al., 2022; Yan et al., 2022
1462	C14H16NO7	Unknown	Unknown	plant biochar leachate	solid phase extraction, FT-ICR-MS	solid phase extraction, FT-ICR-MS	Lignin	Lignin	Other	Chen et al., 2022; Yan et al., 2022
1463	C13H16N3O6	Unknown	Unknown	plant biochar leachate	solid phase extraction, FT-ICR-MS	solid phase extraction, FT-ICR-MS	Lignin	Lignin	Protein	Chen et al., 2022
1464	C18H16NO4	Unknown	Unknown	plant biochar leachate	solid phase extraction, FT-ICR-MS	solid phase extraction, FT-ICR-MS	Other	Lignin	Other	Chen et al., 2022; Yan et al., 2022
1465	C15H20NO6	Unknown	Unknown	plant biochar leachate	solid phase extraction, FT-ICR-MS	solid phase extraction, FT-ICR-MS	Lignin	Lignin	Other	Chen et al., 2022
1466	C14H20N3O5	Unknown	Unknown	plant biochar leachate	solid phase extraction, FT-ICR-MS	solid phase extraction, FT-ICR-MS	Lignin	Lignin	Protein	Chen et al., 2022
1467	C19H20NO3	Unknown	Unknown	plant biochar leachate	solid phase extraction, FT-ICR-MS	solid phase extraction, FT-ICR-MS	Other	Lignin	Other	Chen et al., 2022
1468	C16H24NO5	Unknown	Unknown	plant biochar leachate	solid phase extraction, FT-ICR-MS	solid phase extraction, FT-ICR-MS	Protein	Protein	Other	Chen et al., 2022
1469	C12H7O8S	Unknown	Unknown	plant biochar leachate	solid phase extraction, FT-ICR-MS	solid phase extraction, FT-ICR-MS	Cond Hydrocarbon	Cond Hydrocarbon	Other	Chen et al., 2022
1470	C12H7O10	Unknown	Unknown	plant biochar leachate	solid phase extraction, FT-ICR-MS	solid phase extraction, FT-ICR-MS	Other	Cond Hydrocarbon	Other	Chen et al., 2022; Yan et al., 2022
1471	C16H7O7	Unknown	Unknown	plant biochar leachate	solid phase extraction, FT-ICR-MS	solid phase extraction, FT-ICR-MS	Cond Hydrocarbon	Cond Hydrocarbon	Other	Chen et al., 2022; Yan et al., 2022
1472	C13H11O9	Unknown	Unknown	plant biochar leachate	solid phase extraction, FT-ICR-MS	solid phase extraction, FT-ICR-MS	Tannin	Tannin	Other	Chen et al., 2022; Yan et al., 2022
1473	C10H15O9S	Unknown	Unknown	plant biochar leachate	solid phase extraction, FT-ICR-MS	solid phase extraction, FT-ICR-MS	Carbohydrate	Carbohydrate	Other	Chen et al., 2022
1474	C21H11OS	Unknown	Unknown	plant biochar leachate	solid phase extraction, FT-ICR-MS	solid phase extraction, FT-ICR-MS	Other	Cond Hydrocarbon	Other	Chen et al., 2022
1475	C17H11O6	Unknown	Unknown	plant biochar leachate	solid phase extraction, FT-ICR-MS	solid phase extraction, FT-ICR-MS	Cond Hydrocarbon	Cond Hydrocarbon	Other	Chen et al., 2022; Yan et al., 2022
1476	C14H15O8	Unknown	Unknown	plant biochar leachate	solid phase extraction, FT-ICR-MS	solid phase extraction, FT-ICR-MS	Lignin	Lignin	Other	Chen et al., 2022; Yan et al., 2022
1477	C11H19O8S	Unknown	Unknown	plant biochar leachate	solid phase extraction, FT-ICR-MS	solid phase extraction, FT-ICR-MS	Carbohydrate	Carbohydrate	Other	Chen et al., 2022
1478	C13H15N2O7	Unknown	Unknown	plant biochar leachate	solid phase extraction, FT-ICR-MS	solid phase extraction, FT-ICR-MS	Lignin	Lignin	Protein	Chen et al., 2022
1479	C18H15O5	Unknown	Unknown	plant biochar leachate	solid phase extraction, FT-ICR-MS	solid phase extraction, FT-ICR-MS	Other	Lignin	Other	Chen et al., 2022; Yan et al., 2022
1480	C17H15N2O4	Unknown	Unknown	plant biochar leachate	solid phase extraction, FT-ICR-MS	solid phase extraction, FT-ICR-MS	Other	Lignin	Other	Chen et al., 2022; Yan et al., 2022
1481	C15H19O7	Unknown	Unknown	plant biochar leachate	solid phase extraction, FT-ICR-MS	solid phase extraction, FT-ICR-MS	Lignin	Lignin	Other	Chen et al., 2022; Yan et al., 2022
1482	C14H19N2O6	Unknown	Unknown	plant biochar leachate	solid phase extraction, FT-ICR-MS	solid phase extraction, FT-ICR-MS	Lignin	Lignin	Protein	Chen et al., 2022
1483	C19H19O4	Unknown	Unknown	plant biochar leachate	solid phase extraction, FT-ICR-MS	solid phase extraction, FT-ICR-MS	Other	Lignin	Other	Chen et al., 2022
1484	C18H19N2O3	Unknown	Unknown	plant biochar leachate	solid phase extraction, FT-ICR-MS	solid phase extraction, FT-ICR-MS	Other	Lignin	Other	Chen et al., 2022
1485	C16H23O6	Unknown	Unknown	plant biochar leachate	solid phase extraction, FT-ICR-MS	solid phase extraction, FT-ICR-MS	Lignin	Lignin	Other	Chen et al., 2022; Yan et al., 2022
1486	C15H23N2O5	Unknown	Unknown	plant biochar leachate	solid phase extraction, FT-ICR-MS	solid phase extraction, FT-ICR-MS	Protein	Protein	Protein	Chen et al., 2022
1487	C17H27O3S	Unknown	Unknown	plant biochar leachate	solid phase extraction, FT-ICR-MS	solid phase extraction, FT-ICR-MS	Lipid	Lipid	Other	Chen et al., 2022
1488	C17H27O5	Unknown	Unknown	plant biochar leachate	solid phase extraction, FT-ICR-MS	solid phase extraction, FT-ICR-MS	Lipid	Lipid	Other	Chen et al., 2022; Yan et al., 2022
1489	C18H31O4	Unknown	Unknown	plant biochar leachate	solid phase extraction, FT-ICR-MS	solid phase extraction, FT-ICR-MS	Lipid	Lipid	Other	Chen et al., 2022
1490	C11H6NO10	Unknown	Unknown	plant biochar leachate	solid phase extraction, FT-ICR-MS	solid phase extraction, FT-ICR-MS	Other	Cond Hydrocarbon	Other	Chen et al., 2022
1491	C15H6NO7	Unknown	Unknown	plant biochar leachate	solid phase extraction, FT-ICR-MS	solid phase extraction, FT-ICR-MS	Cond Hydrocarbon	Cond Hydrocarbon	Other	Chen et al., 2022; Yan et al., 2022
1492	C12H10NO9	Unknown	Unknown	plant biochar leachate	solid phase extraction, FT-ICR-MS	solid phase extraction, FT-ICR-MS	Tannin	Tannin	Other	Chen et al., 2022
1493	C18H6N3O3	Unknown	Unknown	plant biochar leachate	solid phase extraction, FT-ICR-MS	solid phase extraction, FT-ICR-MS	Cond Hydrocarbon	Cond Hydrocarbon	Other	Chen et al., 2022
1494	C16H10NO6	Unknown	Unknown	plant biochar leachate	solid phase extraction, FT-ICR-MS	solid phase extraction, FT-ICR-MS	Cond Hydrocarbon	Cond Hydrocarbon	Other	Chen et al., 2022; Yan et al., 2022
1495	C13H14NO6S	Unknown	Unknown	plant biochar leachate	solid phase extraction, FT-ICR-MS	solid phase extraction, FT-ICR-MS	Lignin	Lignin	Other	Chen et al., 2022
1496	C13H14NO8	Unknown	Unknown	plant biochar leachate	solid phase extraction, FT-ICR-MS	solid phase extraction, FT-ICR-MS	Lignin	Lignin	Other	Chen et al., 2022; Yan et al., 2022
1497	C17H14NO5	Unknown	Unknown	plant biochar leachate	solid phase extraction, FT-ICR-MS	solid phase extraction, FT-ICR-MS	Lignin	Lignin	Other	Chen et al., 2022; Yan et al., 2022
1498	C14H18NO7	Unknown	Unknown	plant biochar leachate	solid phase extraction, FT-ICR-MS	solid phase extraction, FT-ICR-MS	Lignin	Lignin	Other	Chen et al., 2022; Yan et al., 2022
1499	C18H18NO4	Unknown	Unknown	plant biochar leachate	solid phase extraction, FT-ICR-MS	solid phase extraction, FT-ICR-MS	Other	Lignin	Other	Chen et al., 2022
1500	C15H22NO6	Unknown	Unknown	plant biochar leachate	solid phase extraction, FT-ICR-MS	solid phase extraction, FT-ICR-MS	Protein	Lignin	Other	Chen et al., 2022
1501	C14H22N3O5	Unknown	Unknown	plant biochar leachate	solid phase extraction, FT-ICR-MS	solid phase extraction, FT-ICR-MS	Protein	Protein	Protein	Chen et al., 2022
1502	C16H26NO5	Unknown	Unknown	plant biochar leachate	solid phase extraction, FT-ICR-MS	solid phase extraction, FT-ICR-MS	Protein	Protein	Other	Chen et al., 2022
1503	C11H5O9S	Unknown	Unknown	plant biochar leachate	solid phase extraction, FT-ICR-MS	solid phase extraction, FT-ICR-MS	Other	Cond Hydrocarbon	Other	Chen et al., 2022
1504	C11H5O11	Unknown	Unknown	plant biochar leachate	solid phase extraction, FT-ICR-MS	solid phase extraction, FT-ICR-MS	Other	Other	Other	Chen et al., 2022; Yan et al., 2022
1505	C15H5O8	Unknown	Unknown	plant biochar leachate	solid phase extraction, FT-ICR-MS	solid phase extraction, FT-ICR-MS	Cond Hydrocarbon	Cond Hydrocarbon	Other	Chen et al., 2022; Yan et al., 2022
1506	C12H9O8S	Unknown	Unknown	plant biochar leachate	solid phase extraction, FT-ICR-MS	solid phase extraction, FT-ICR-MS	Tannin;Cond Hydrocarbon	Cond Hydrocarbon	Other	Chen et al., 2022
1507	C12H9O10	Unknown	Unknown	plant biochar leachate	solid phase extraction, FT-ICR-MS	solid phase extraction, FT-ICR-MS	Tannin	Cond Hydrocarbon	Other	Chen et al., 2022; Yan et al., 2022
1508	C18H5N2O4	Unknown	Unknown	plant biochar leachate	solid phase extraction, FT-ICR-MS	solid phase extraction, FT-ICR-MS	Other	Cond Hydrocarbon	Other	Chen et al., 2022
1509	C16H9O7	Unknown	Unknown	plant biochar leachate	solid phase extraction, FT-ICR-MS	solid phase extraction, FT-ICR-MS	Cond Hydrocarbon	Cond Hydrocarbon	Other	Chen et al., 2022; Yan et al., 2022
1510	C13H13O7S	Unknown	Unknown	plant biochar leachate	solid phase extraction, FT-ICR-MS	solid phase extraction, FT-ICR-MS	Lignin	Lignin	Other	Chen et al., 2022
1511	C15H9N2O6	Unknown	Unknown	plant biochar leachate	solid phase extraction, FT-ICR-MS	solid phase extraction, FT-ICR-MS	Cond Hydrocarbon	Cond Hydrocarbon	Other	Chen et al., 2022
1512	C13H13O9	Unknown	Unknown	plant biochar leachate	solid phase extraction, FT-ICR-MS	solid phase extraction, FT-ICR-MS	Tannin	Tannin	Other	Chen et al., 2022; Goranov et al., 2020; Yan et al., 2022
1513	C12H13N2O8	Unknown	Unknown	plant biochar leachate	solid phase extraction, FT-ICR-MS	solid phase extraction, FT-ICR-MS	Tannin	Tannin	Other	Chen et al., 2022
1514	C21H13OS	Unknown	Unknown	plant biochar leachate	solid phase extraction, FT-ICR-MS	solid phase extraction, FT-ICR-MS	Other	Cond Hydrocarbon	Other	Chen et al., 2022
1515	C17H13O6	Unknown	Unknown	plant biochar leachate	solid phase extraction, FT-ICR-MS	solid phase extraction, FT-ICR-MS	Cond Hydrocarbon	Cond Hydrocarbon	Other	Chen et al., 2022; Goranov et al., 2020; Yan et al., 2022
1516	C16H13N2O5	Unknown	Unknown	plant biochar leachate	solid phase extraction, FT-ICR-MS	solid phase extraction, FT-ICR-MS	Lignin	Lignin	Other	Chen et al., 2022
1517	C14H17O8	Unknown	Unknown	plant biochar leachate	solid phase extraction, FT-ICR-MS	solid phase extraction, FT-ICR-MS	Lignin	Lignin	Other	Chen et al., 2022; Yan et al., 2022
1518	C11H21O8S	Unknown	Unknown	plant biochar leachate	solid phase extraction, FT-ICR-MS	solid phase extraction, FT-ICR-MS	Carbohydrate	Carbohydrate	Other	Chen et al., 2022
1519	C17H17N2O2S	Unknown	Unknown	plant biochar leachate	solid phase extraction, FT-ICR-MS	solid phase extraction, FT-ICR-MS	Unsat Hydrocarbon	Unsat Hydrocarbon	Other	Chen et al., 2022
1520	C13H17N2O7	Unknown	Unknown	plant biochar leachate	solid phase extraction, FT-ICR-MS	solid phase extraction, FT-ICR-MS	Lignin	Lignin	Protein	Chen et al., 2022
1521	C18H17O5	Unknown	Unknown	plant biochar leachate	solid phase extraction, FT-ICR-MS	solid phase extraction, FT-ICR-MS	Other	Lignin	Other	Chen et al., 2022; Yan et al., 2022
1522	C17H17N2O4	Unknown	Unknown	plant biochar leachate	solid phase extraction, FT-ICR-MS	solid phase extraction, FT-ICR-MS	Other	Lignin	Other	Chen et al., 2022; Yan et al., 2022
1523	C15H21O7	Unknown	Unknown	plant biochar leachate	solid phase extraction, FT-ICR-MS	solid phase extraction, FT-ICR-MS	Lignin	Lignin	Other	Chen et al., 2022; Yan et al., 2022
1524	C14H21N2O6	Unknown	Unknown	plant biochar leachate	solid phase extraction, FT-ICR-MS	solid phase extraction, FT-ICR-MS	Protein	Protein	Protein	Chen et al., 2022
1525	C19H21O4	Unknown	Unknown	plant biochar leachate	solid phase extraction, FT-ICR-MS	solid phase extraction, FT-ICR-MS	Other	Lignin	Other	Chen et al., 2022; Yan et al., 2022
1526	C18H21N2O3	Unknown	Unknown	plant biochar leachate	solid phase extraction, FT-ICR-MS	solid phase extraction, FT-ICR-MS	Other	Lignin	Other	Chen et al., 2022
1527	C16H25O6	Unknown	Unknown	plant biochar leachate	solid phase extraction, FT-ICR-MS	solid phase extraction, FT-ICR-MS	Protein	Protein	Other	Chen et al., 2022
1528	C15H25N2O5	Unknown	Unknown	plant biochar leachate	solid phase extraction, FT-ICR-MS	solid phase extraction, FT-ICR-MS	Protein	Protein	Protein	Chen et al., 2022
1529	C17H29O5	Unknown	Unknown	plant biochar leachate	solid phase extraction, FT-ICR-MS	solid phase extraction, FT-ICR-MS	Lipid	Lipid	Other	Chen et al., 2022
1530	C16H29N2O4	Unknown	Unknown	plant biochar leachate	solid phase extraction, FT-ICR-MS	solid phase extraction, FT-ICR-MS	Lipid	Lipid	Other	Chen et al., 2022
1531	C11H8NO10	Unknown	Unknown	plant biochar leachate	solid phase extraction, FT-ICR-MS	solid phase extraction, FT-ICR-MS	Tannin	Cond Hydrocarbon	Other	Chen et al., 2022
1532	C15H8NO7	Unknown	Unknown	plant biochar leachate	solid phase extraction, FT-ICR-MS	solid phase extraction, FT-ICR-MS	Cond Hydrocarbon	Cond Hydrocarbon	Other	Chen et al., 2022; Yan et al., 2022
1533	C12H12NO7S	Unknown	Unknown	plant biochar leachate	solid phase extraction, FT-ICR-MS	solid phase extraction, FT-ICR-MS	Lignin	Lignin	Other	Chen et al., 2022
1534	C12H12NO9	Unknown	Unknown	plant biochar leachate	solid phase extraction, FT-ICR-MS	solid phase extraction, FT-ICR-MS	Tannin	Tannin	Other	Chen et al., 2022
1535	C11H12N3O8	Unknown	Unknown	plant biochar leachate	solid phase extraction, FT-ICR-MS	solid phase extraction, FT-ICR-MS	Tannin	Tannin	Other	Chen et al., 2022
1536	C16H12NO6	Unknown	Unknown	plant biochar leachate	solid phase extraction, FT-ICR-MS	solid phase extraction, FT-ICR-MS	Cond Hydrocarbon	Cond Hydrocarbon	Other	Chen et al., 2022; Yan et al., 2022
1537	C13H16NO8	Unknown	Unknown	plant biochar leachate	solid phase extraction, FT-ICR-MS	solid phase extraction, FT-ICR-MS	Lignin	Lignin	Other	Chen et al., 2022; Yan et al., 2022
1538	C12H16N3O7	Unknown	Unknown	plant biochar leachate	solid phase extraction, FT-ICR-MS	solid phase extraction, FT-ICR-MS	Lignin	Lignin	Protein	Chen et al., 2022
1539	C17H16NO5	Unknown	Unknown	plant biochar leachate	solid phase extraction, FT-ICR-MS	solid phase extraction, FT-ICR-MS	Lignin	Lignin	Other	Chen et al., 2022; Yan et al., 2022
1540	C14H20NO7	Unknown	Unknown	plant biochar leachate	solid phase extraction, FT-ICR-MS	solid phase extraction, FT-ICR-MS	Lignin	Lignin	Other	Chen et al., 2022
1541	C18H20NO4	Unknown	Unknown	plant biochar leachate	solid phase extraction, FT-ICR-MS	solid phase extraction, FT-ICR-MS	Other	Lignin	Other	Chen et al., 2022
1542	C17H20N3O3	Unknown	Unknown	plant biochar leachate	solid phase extraction, FT-ICR-MS	solid phase extraction, FT-ICR-MS	Other	Lignin	Protein	Chen et al., 2022
1543	C15H24NO6	Unknown	Unknown	plant biochar leachate	solid phase extraction, FT-ICR-MS	solid phase extraction, FT-ICR-MS	Protein	Protein	Other	Chen et al., 2022
1544	C14H24N3O5	Unknown	Unknown	plant biochar leachate	solid phase extraction, FT-ICR-MS	solid phase extraction, FT-ICR-MS	Protein	Protein	Protein	Chen et al., 2022
1545	C11H7O9S	Unknown	Unknown	plant biochar leachate	solid phase extraction, FT-ICR-MS	solid phase extraction, FT-ICR-MS	Other	Cond Hydrocarbon	Other	Chen et al., 2022
1546	C15H7O8	Unknown	Unknown	plant biochar leachate	solid phase extraction, FT-ICR-MS	solid phase extraction, FT-ICR-MS	Cond Hydrocarbon	Cond Hydrocarbon	Other	Chen et al., 2022; Yan et al., 2022
1547	C12H11O8S	Unknown	Unknown	plant biochar leachate	solid phase extraction, FT-ICR-MS	solid phase extraction, FT-ICR-MS	Tannin	Tannin	Other	Chen et al., 2022
1548	C14H7N2O7	Unknown	Unknown	plant biochar leachate	solid phase extraction, FT-ICR-MS	solid phase extraction, FT-ICR-MS	Cond Hydrocarbon	Cond Hydrocarbon	Other	Chen et al., 2022; Yan et al., 2022
1549	C19H7O5	Unknown	Unknown	plant biochar leachate	solid phase extraction, FT-ICR-MS	solid phase extraction, FT-ICR-MS	Cond Hydrocarbon	Cond Hydrocarbon	Other	Chen et al., 2022
1550	C12H11O10	Unknown	Unknown	plant biochar leachate	solid phase extraction, FT-ICR-MS	solid phase extraction, FT-ICR-MS	Tannin	Tannin	Other	Chen et al., 2022; Goranov et al., 2020
1551	C16H11O7	Unknown	Unknown	plant biochar leachate	solid phase extraction, FT-ICR-MS	solid phase extraction, FT-ICR-MS	Cond Hydrocarbon	Cond Hydrocarbon	Other	Chen et al., 2022; Goranov et al., 2020; Yan et al., 2022
1552	C13H15O7S	Unknown	Unknown	plant biochar leachate	solid phase extraction, FT-ICR-MS	solid phase extraction, FT-ICR-MS	Lignin	Lignin	Other	Chen et al., 2022
1553	C15H11N2O6	Unknown	Unknown	plant biochar leachate	solid phase extraction, FT-ICR-MS	solid phase extraction, FT-ICR-MS	Cond Hydrocarbon	Cond Hydrocarbon	Other	Chen et al., 2022; Yan et al., 2022
1554	C20H11O4	Unknown	Unknown	plant biochar leachate	solid phase extraction, FT-ICR-MS	solid phase extraction, FT-ICR-MS	Cond Hydrocarbon	Cond Hydrocarbon	Other	Chen et al., 2022
1555	C13H15O9	Unknown	Unknown	plant biochar leachate	solid phase extraction, FT-ICR-MS	solid phase extraction, FT-ICR-MS	Tannin	Tannin	Other	Chen et al., 2022; Goranov et al., 2020; Yan et al., 2022
1556	C12H15N2O8	Unknown	Unknown	plant biochar leachate	solid phase extraction, FT-ICR-MS	solid phase extraction, FT-ICR-MS	Tannin	Tannin	Other	Chen et al., 2022
1557	C17H15O6	Unknown	Unknown	plant biochar leachate	solid phase extraction, FT-ICR-MS	solid phase extraction, FT-ICR-MS	Lignin	Lignin	Other	Chen et al., 2022; Yan et al., 2022
1558	C16H15N2O5	Unknown	Unknown	plant biochar leachate	solid phase extraction, FT-ICR-MS	solid phase extraction, FT-ICR-MS	Lignin	Lignin	Other	Chen et al., 2022; Yan et al., 2022
1559	C14H19O8	Unknown	Unknown	plant biochar leachate	solid phase extraction, FT-ICR-MS	solid phase extraction, FT-ICR-MS	Lignin;Amino Sugar	Lignin	Other	Chen et al., 2022
1560	C13H19N2O7	Unknown	Unknown	plant biochar leachate	solid phase extraction, FT-ICR-MS	solid phase extraction, FT-ICR-MS	Protein	Lignin	Protein	Chen et al., 2022
1561	C18H19O5	Unknown	Unknown	plant biochar leachate	solid phase extraction, FT-ICR-MS	solid phase extraction, FT-ICR-MS	Other	Lignin	Other	Chen et al., 2022; Yan et al., 2022
1562	C17H19N2O4	Unknown	Unknown	plant biochar leachate	solid phase extraction, FT-ICR-MS	solid phase extraction, FT-ICR-MS	Other	Lignin	Other	Chen et al., 2022
1563	C15H23O7	Unknown	Unknown	plant biochar leachate	solid phase extraction, FT-ICR-MS	solid phase extraction, FT-ICR-MS	Protein	Protein	Other	Chen et al., 2022
1564	C14H23N2O6	Unknown	Unknown	plant biochar leachate	solid phase extraction, FT-ICR-MS	solid phase extraction, FT-ICR-MS	Protein	Protein	Protein	Chen et al., 2022
1565	C19H23O4	Unknown	Unknown	plant biochar leachate	solid phase extraction, FT-ICR-MS	solid phase extraction, FT-ICR-MS	Other	Lignin	Other	Chen et al., 2022
1566	C16H27O6	Unknown	Unknown	plant biochar leachate	solid phase extraction, FT-ICR-MS	solid phase extraction, FT-ICR-MS	Protein	Protein	Other	Chen et al., 2022
1567	C14H6NO8	Unknown	Unknown	plant biochar leachate	solid phase extraction, FT-ICR-MS	solid phase extraction, FT-ICR-MS	Cond Hydrocarbon	Cond Hydrocarbon	Other	Chen et al., 2022; Yan et al., 2022
1568	C11H10NO8S	Unknown	Unknown	plant biochar leachate	solid phase extraction, FT-ICR-MS	solid phase extraction, FT-ICR-MS	Tannin	Tannin	Other	Chen et al., 2022
1569	C11H10NO10	Unknown	Unknown	plant biochar leachate	solid phase extraction, FT-ICR-MS	solid phase extraction, FT-ICR-MS	Tannin	Tannin	Other	Chen et al., 2022
1570	C15H10NO7	Unknown	Unknown	plant biochar leachate	solid phase extraction, FT-ICR-MS	solid phase extraction, FT-ICR-MS	Cond Hydrocarbon	Cond Hydrocarbon	Other	Chen et al., 2022; Yan et al., 2022
1571	C12H14NO9	Unknown	Unknown	plant biochar leachate	solid phase extraction, FT-ICR-MS	solid phase extraction, FT-ICR-MS	Tannin	Tannin	Other	Chen et al., 2022
1572	C16H14NO6	Unknown	Unknown	plant biochar leachate	solid phase extraction, FT-ICR-MS	solid phase extraction, FT-ICR-MS	Lignin	Lignin	Other	Chen et al., 2022; Yan et al., 2022
1573	C13H18NO8	Unknown	Unknown	plant biochar leachate	solid phase extraction, FT-ICR-MS	solid phase extraction, FT-ICR-MS	Lignin;Amino Sugar	Lignin	Other	Chen et al., 2022
1574	C17H18NO5	Unknown	Unknown	plant biochar leachate	solid phase extraction, FT-ICR-MS	solid phase extraction, FT-ICR-MS	Lignin	Lignin	Other	Chen et al., 2022; Yan et al., 2022
1575	C14H22NO7	Unknown	Unknown	plant biochar leachate	solid phase extraction, FT-ICR-MS	solid phase extraction, FT-ICR-MS	Protein	Protein	Other	Chen et al., 2022
1576	C18H22NO4	Unknown	Unknown	plant biochar leachate	solid phase extraction, FT-ICR-MS	solid phase extraction, FT-ICR-MS	Other	Lignin	Other	Chen et al., 2022
1577	C14H5O9	Unknown	Unknown	plant biochar leachate	solid phase extraction, FT-ICR-MS	solid phase extraction, FT-ICR-MS	Cond Hydrocarbon	Cond Hydrocarbon	Other	Chen et al., 2022; Yan et al., 2022
1578	C11H9O9S	Unknown	Unknown	plant biochar leachate	solid phase extraction, FT-ICR-MS	solid phase extraction, FT-ICR-MS	Tannin	Tannin	Other	Chen et al., 2022
1579	C11H9O11	Unknown	Unknown	plant biochar leachate	solid phase extraction, FT-ICR-MS	solid phase extraction, FT-ICR-MS	Tannin	Tannin	Other	Chen et al., 2022
1580	C15H9O8	Unknown	Unknown	plant biochar leachate	solid phase extraction, FT-ICR-MS	solid phase extraction, FT-ICR-MS	Cond Hydrocarbon	Cond Hydrocarbon	Other	Chen et al., 2022; Yan et al., 2022
1581	C12H13O8S	Unknown	Unknown	plant biochar leachate	solid phase extraction, FT-ICR-MS	solid phase extraction, FT-ICR-MS	Tannin	Tannin	Other	Chen et al., 2022
1582	C14H9N2O7	Unknown	Unknown	plant biochar leachate	solid phase extraction, FT-ICR-MS	solid phase extraction, FT-ICR-MS	Cond Hydrocarbon	Cond Hydrocarbon	Other	Chen et al., 2022; Yan et al., 2022
1583	C19H9O5	Unknown	Unknown	plant biochar leachate	solid phase extraction, FT-ICR-MS	solid phase extraction, FT-ICR-MS	Cond Hydrocarbon	Cond Hydrocarbon	Other	Chen et al., 2022; Yan et al., 2022
1584	C12H13O10	Unknown	Unknown	plant biochar leachate	solid phase extraction, FT-ICR-MS	solid phase extraction, FT-ICR-MS	Tannin	Tannin	Other	Chen et al., 2022; Goranov et al., 2020
1585	C16H13O7	Unknown	Unknown	plant biochar leachate	solid phase extraction, FT-ICR-MS	solid phase extraction, FT-ICR-MS	Lignin	Lignin	Other	Chen et al., 2022; Yan et al., 2022
1586	C15H13N2O6	Unknown	Unknown	plant biochar leachate	solid phase extraction, FT-ICR-MS	solid phase extraction, FT-ICR-MS	Lignin	Lignin	Other	Chen et al., 2022; Yan et al., 2022
1587	C20H13O4	Unknown	Unknown	plant biochar leachate	solid phase extraction, FT-ICR-MS	solid phase extraction, FT-ICR-MS	Cond Hydrocarbon	Cond Hydrocarbon	Other	Chen et al., 2022
1588	C13H17O9	Unknown	Unknown	plant biochar leachate	solid phase extraction, FT-ICR-MS	solid phase extraction, FT-ICR-MS	Other	Tannin	Other	Chen et al., 2022
1589	C12H17N2O8	Unknown	Unknown	plant biochar leachate	solid phase extraction, FT-ICR-MS	solid phase extraction, FT-ICR-MS	Amino Sugar	Tannin	Other	Chen et al., 2022
1590	C17H17O6	Unknown	Unknown	plant biochar leachate	solid phase extraction, FT-ICR-MS	solid phase extraction, FT-ICR-MS	Lignin	Lignin	Other	Chen et al., 2022; Yan et al., 2022
1591	C16H17N2O5	Unknown	Unknown	plant biochar leachate	solid phase extraction, FT-ICR-MS	solid phase extraction, FT-ICR-MS	Lignin	Lignin	Other	Chen et al., 2022; Yan et al., 2022
1592	C21H17O3	Unknown	Unknown	plant biochar leachate	solid phase extraction, FT-ICR-MS	solid phase extraction, FT-ICR-MS	Unsat Hydrocarbon;Cond Hydrocarbon	Lignin	Other	Chen et al., 2022
1593	C14H21O8	Unknown	Unknown	plant biochar leachate	solid phase extraction, FT-ICR-MS	solid phase extraction, FT-ICR-MS	Amino Sugar	Amino Sugar	Other	Chen et al., 2022
1594	C13H21N2O7	Unknown	Unknown	plant biochar leachate	solid phase extraction, FT-ICR-MS	solid phase extraction, FT-ICR-MS	Protein	Protein	Protein	Chen et al., 2022
1595	C18H21O5	Unknown	Unknown	plant biochar leachate	solid phase extraction, FT-ICR-MS	solid phase extraction, FT-ICR-MS	Other	Lignin	Other	Chen et al., 2022; Yan et al., 2022
1596	C17H21N2O4	Unknown	Unknown	plant biochar leachate	solid phase extraction, FT-ICR-MS	solid phase extraction, FT-ICR-MS	Other	Lignin	Other	Chen et al., 2022
1597	C15H25O7	Unknown	Unknown	plant biochar leachate	solid phase extraction, FT-ICR-MS	solid phase extraction, FT-ICR-MS	Protein	Protein	Other	Chen et al., 2022
1598	C19H25O4	Unknown	Unknown	plant biochar leachate	solid phase extraction, FT-ICR-MS	solid phase extraction, FT-ICR-MS	Other	Lignin	Other	Chen et al., 2022
1599	C13H4NO9	Unknown	Unknown	plant biochar leachate	solid phase extraction, FT-ICR-MS	solid phase extraction, FT-ICR-MS	Cond Hydrocarbon	Cond Hydrocarbon	Other	Chen et al., 2022
1600	C14H8NO8	Unknown	Unknown	plant biochar leachate	solid phase extraction, FT-ICR-MS	solid phase extraction, FT-ICR-MS	Cond Hydrocarbon	Cond Hydrocarbon	Other	Chen et al., 2022; Yan et al., 2022
1601	C18H8NO5	Unknown	Unknown	plant biochar leachate	solid phase extraction, FT-ICR-MS	solid phase extraction, FT-ICR-MS	Cond Hydrocarbon	Cond Hydrocarbon	Other	Chen et al., 2022; Yan et al., 2022
1602	C15H12NO7	Unknown	Unknown	plant biochar leachate	solid phase extraction, FT-ICR-MS	solid phase extraction, FT-ICR-MS	Cond Hydrocarbon	Lignin	Other	Chen et al., 2022; Yan et al., 2022
1603	C12H16NO7S	Unknown	Unknown	plant biochar leachate	solid phase extraction, FT-ICR-MS	solid phase extraction, FT-ICR-MS	Lignin	Lignin	Other	Chen et al., 2022
1604	C19H12NO4	Unknown	Unknown	plant biochar leachate	solid phase extraction, FT-ICR-MS	solid phase extraction, FT-ICR-MS	Cond Hydrocarbon	Cond Hydrocarbon	Other	Chen et al., 2022
1605	C12H16NO9	Unknown	Unknown	plant biochar leachate	solid phase extraction, FT-ICR-MS	solid phase extraction, FT-ICR-MS	Other	Tannin	Other	Chen et al., 2022
1606	C16H16NO6	Unknown	Unknown	plant biochar leachate	solid phase extraction, FT-ICR-MS	solid phase extraction, FT-ICR-MS	Lignin	Lignin	Other	Chen et al., 2022; Yan et al., 2022
1607	C15H16N3O5	Unknown	Unknown	plant biochar leachate	solid phase extraction, FT-ICR-MS	solid phase extraction, FT-ICR-MS	Lignin	Lignin	Protein	Chen et al., 2022
1608	C13H20NO8	Unknown	Unknown	plant biochar leachate	solid phase extraction, FT-ICR-MS	solid phase extraction, FT-ICR-MS	Amino Sugar	Amino Sugar	Other	Chen et al., 2022
1609	C17H20NO5	Unknown	Unknown	plant biochar leachate	solid phase extraction, FT-ICR-MS	solid phase extraction, FT-ICR-MS	Lignin	Lignin	Other	Chen et al., 2022; Yan et al., 2022
1610	C18H24NO4	Unknown	Unknown	plant biochar leachate	solid phase extraction, FT-ICR-MS	solid phase extraction, FT-ICR-MS	Other	Lignin	Other	Chen et al., 2022
1611	C16H32NO5	Unknown	Unknown	plant biochar leachate	solid phase extraction, FT-ICR-MS	solid phase extraction, FT-ICR-MS	Protein	Protein	Other	Chen et al., 2022
1612	C10H7O10S	Unknown	Unknown	plant biochar leachate	solid phase extraction, FT-ICR-MS	solid phase extraction, FT-ICR-MS	Tannin	Other	Other	Chen et al., 2022
1613	C14H7O7S	Unknown	Unknown	plant biochar leachate	solid phase extraction, FT-ICR-MS	solid phase extraction, FT-ICR-MS	Cond Hydrocarbon	Cond Hydrocarbon	Other	Chen et al., 2022
1614	C14H7O9	Unknown	Unknown	plant biochar leachate	solid phase extraction, FT-ICR-MS	solid phase extraction, FT-ICR-MS	Cond Hydrocarbon	Cond Hydrocarbon	Other	Chen et al., 2022; Yan et al., 2022
1615	C11H11O9S	Unknown	Unknown	plant biochar leachate	solid phase extraction, FT-ICR-MS	solid phase extraction, FT-ICR-MS	Tannin	Tannin	Other	Chen et al., 2022
1616	C13H7N2O8	Unknown	Unknown	plant biochar leachate	solid phase extraction, FT-ICR-MS	solid phase extraction, FT-ICR-MS	Cond Hydrocarbon	Cond Hydrocarbon	Other	Chen et al., 2022
1617	C22H7OS	Unknown	Unknown	plant biochar leachate	solid phase extraction, FT-ICR-MS	solid phase extraction, FT-ICR-MS	Other	Cond Hydrocarbon	Other	Chen et al., 2022
1618	C18H7O6	Unknown	Unknown	plant biochar leachate	solid phase extraction, FT-ICR-MS	solid phase extraction, FT-ICR-MS	Cond Hydrocarbon	Cond Hydrocarbon	Other	Chen et al., 2022
1619	C11H11O11	Unknown	Unknown	plant biochar leachate	solid phase extraction, FT-ICR-MS	solid phase extraction, FT-ICR-MS	Tannin	Tannin	Other	Chen et al., 2022; Goranov et al., 2020
1620	C15H11O8	Unknown	Unknown	plant biochar leachate	solid phase extraction, FT-ICR-MS	solid phase extraction, FT-ICR-MS	Cond Hydrocarbon	Cond Hydrocarbon	Other	Chen et al., 2022; Goranov et al., 2020; Yan et al., 2022
1621	C12H15O8S	Unknown	Unknown	plant biochar leachate	solid phase extraction, FT-ICR-MS	solid phase extraction, FT-ICR-MS	Tannin	Tannin	Other	Chen et al., 2022
1622	C14H11N2O7	Unknown	Unknown	plant biochar leachate	solid phase extraction, FT-ICR-MS	solid phase extraction, FT-ICR-MS	Cond Hydrocarbon	Cond Hydrocarbon	Other	Chen et al., 2022; Yan et al., 2022
1623	C11H15N2O7S	Unknown	Unknown	plant biochar leachate	solid phase extraction, FT-ICR-MS	solid phase extraction, FT-ICR-MS	Lignin;Amino Sugar	Lignin	Other	Chen et al., 2022
1624	C19H11O5	Unknown	Unknown	plant biochar leachate	solid phase extraction, FT-ICR-MS	solid phase extraction, FT-ICR-MS	Cond Hydrocarbon	Cond Hydrocarbon	Other	Chen et al., 2022; Yan et al., 2022
1625	C12H15O10	Unknown	Unknown	plant biochar leachate	solid phase extraction, FT-ICR-MS	solid phase extraction, FT-ICR-MS	Tannin	Tannin	Other	Chen et al., 2022; Goranov et al., 2020
1626	C16H15O7	Unknown	Unknown	plant biochar leachate	solid phase extraction, FT-ICR-MS	solid phase extraction, FT-ICR-MS	Lignin	Lignin	Other	Chen et al., 2022; Goranov et al., 2020; Yan et al., 2022
1627	C13H19O7S	Unknown	Unknown	plant biochar leachate	solid phase extraction, FT-ICR-MS	solid phase extraction, FT-ICR-MS	Protein	Lignin	Other	Chen et al., 2022
1628	C15H15N2O6	Unknown	Unknown	plant biochar leachate	solid phase extraction, FT-ICR-MS	solid phase extraction, FT-ICR-MS	Lignin	Lignin	Protein	Chen et al., 2022; Yan et al., 2022
1629	C20H15O4	Unknown	Unknown	plant biochar leachate	solid phase extraction, FT-ICR-MS	solid phase extraction, FT-ICR-MS	Cond Hydrocarbon	Cond Hydrocarbon	Other	Chen et al., 2022; Yan et al., 2022
1630	C13H19O9	Unknown	Unknown	plant biochar leachate	solid phase extraction, FT-ICR-MS	solid phase extraction, FT-ICR-MS	Amino Sugar	Tannin	Other	Chen et al., 2022
1631	C17H19O6	Unknown	Unknown	plant biochar leachate	solid phase extraction, FT-ICR-MS	solid phase extraction, FT-ICR-MS	Lignin	Lignin	Other	Chen et al., 2022; Yan et al., 2022
1632	C16H19N2O5	Unknown	Unknown	plant biochar leachate	solid phase extraction, FT-ICR-MS	solid phase extraction, FT-ICR-MS	Lignin	Lignin	Other	Chen et al., 2022
1633	C21H19O3	Unknown	Unknown	plant biochar leachate	solid phase extraction, FT-ICR-MS	solid phase extraction, FT-ICR-MS	Unsat Hydrocarbon	Lignin	Other	Chen et al., 2022
1634	C14H23O8	Unknown	Unknown	plant biochar leachate	solid phase extraction, FT-ICR-MS	solid phase extraction, FT-ICR-MS	Amino Sugar	Amino Sugar	Other	Chen et al., 2022
1635	C18H23O5	Unknown	Unknown	plant biochar leachate	solid phase extraction, FT-ICR-MS	solid phase extraction, FT-ICR-MS	Other	Lignin	Other	Chen et al., 2022
1636	C17H23N2O4	Unknown	Unknown	plant biochar leachate	solid phase extraction, FT-ICR-MS	solid phase extraction, FT-ICR-MS	Other	Lignin	Other	Chen et al., 2022
1637	C19H27O4	Unknown	Unknown	plant biochar leachate	solid phase extraction, FT-ICR-MS	solid phase extraction, FT-ICR-MS	Other	Lignin	Other	Chen et al., 2022
1638	C16H31O6	Unknown	Unknown	plant biochar leachate	solid phase extraction, FT-ICR-MS	solid phase extraction, FT-ICR-MS	Protein	Protein	Other	Chen et al., 2022
1639	C13H6NO9	Unknown	Unknown	plant biochar leachate	solid phase extraction, FT-ICR-MS	solid phase extraction, FT-ICR-MS	Cond Hydrocarbon	Cond Hydrocarbon	Other	Chen et al., 2022; Yan et al., 2022
1640	C12H6N3O8	Unknown	Unknown	plant biochar leachate	solid phase extraction, FT-ICR-MS	solid phase extraction, FT-ICR-MS	Cond Hydrocarbon	Cond Hydrocarbon	Other	Chen et al., 2022
1641	C14H10NO8	Unknown	Unknown	plant biochar leachate	solid phase extraction, FT-ICR-MS	solid phase extraction, FT-ICR-MS	Cond Hydrocarbon	Cond Hydrocarbon	Other	Chen et al., 2022; Yan et al., 2022
1642	C18H10NO5	Unknown	Unknown	plant biochar leachate	solid phase extraction, FT-ICR-MS	solid phase extraction, FT-ICR-MS	Cond Hydrocarbon	Cond Hydrocarbon	Other	Chen et al., 2022; Yan et al., 2022
1643	C15H14NO7	Unknown	Unknown	plant biochar leachate	solid phase extraction, FT-ICR-MS	solid phase extraction, FT-ICR-MS	Lignin	Lignin	Other	Chen et al., 2022; Yan et al., 2022
1644	C19H14NO4	Unknown	Unknown	plant biochar leachate	solid phase extraction, FT-ICR-MS	solid phase extraction, FT-ICR-MS	Cond Hydrocarbon	Cond Hydrocarbon	Other	Chen et al., 2022
1645	C12H18NO9	Unknown	Unknown	plant biochar leachate	solid phase extraction, FT-ICR-MS	solid phase extraction, FT-ICR-MS	Carbohydrate	Carbohydrate	Other	Chen et al., 2022
1646	C16H18NO6	Unknown	Unknown	plant biochar leachate	solid phase extraction, FT-ICR-MS	solid phase extraction, FT-ICR-MS	Lignin	Lignin	Other	Chen et al., 2022; Yan et al., 2022
1647	C13H22NO6S	Unknown	Unknown	plant biochar leachate	solid phase extraction, FT-ICR-MS	solid phase extraction, FT-ICR-MS	Protein	Protein	Other	Chen et al., 2022
1648	C15H18N3O5	Unknown	Unknown	plant biochar leachate	solid phase extraction, FT-ICR-MS	solid phase extraction, FT-ICR-MS	Lignin	Lignin	Protein	Chen et al., 2022
1649	C20H18NO3	Unknown	Unknown	plant biochar leachate	solid phase extraction, FT-ICR-MS	solid phase extraction, FT-ICR-MS	Unsat Hydrocarbon	Lignin	Other	Chen et al., 2022
1650	C13H22NO8	Unknown	Unknown	plant biochar leachate	solid phase extraction, FT-ICR-MS	solid phase extraction, FT-ICR-MS	Amino Sugar	Amino Sugar	Other	Chen et al., 2022
1651	C16H22N3O2S	Unknown	Unknown	plant biochar leachate	solid phase extraction, FT-ICR-MS	solid phase extraction, FT-ICR-MS	Unsat Hydrocarbon	Unsat Hydrocarbon	Protein	Chen et al., 2022
1652	C17H22NO5	Unknown	Unknown	plant biochar leachate	solid phase extraction, FT-ICR-MS	solid phase extraction, FT-ICR-MS	Lignin	Lignin	Other	Chen et al., 2022
1653	C16H22N3O4	Unknown	Unknown	plant biochar leachate	solid phase extraction, FT-ICR-MS	solid phase extraction, FT-ICR-MS	Other	Lignin	Protein	Chen et al., 2022
1654	C16H34NO5	Unknown	Unknown	plant biochar leachate	solid phase extraction, FT-ICR-MS	solid phase extraction, FT-ICR-MS	Other	Protein	Other	Chen et al., 2022
1655	C13H5O10	Unknown	Unknown	plant biochar leachate	solid phase extraction, FT-ICR-MS	solid phase extraction, FT-ICR-MS	Other	Cond Hydrocarbon	Other	Chen et al., 2022; Yan et al., 2022
1656	C10H9O10S	Unknown	Unknown	plant biochar leachate	solid phase extraction, FT-ICR-MS	solid phase extraction, FT-ICR-MS	Tannin	Tannin	Other	Chen et al., 2022
1657	C16H5N2O4S	Unknown	Unknown	plant biochar leachate	solid phase extraction, FT-ICR-MS	solid phase extraction, FT-ICR-MS	Cond Hydrocarbon	Cond Hydrocarbon	Other	Chen et al., 2022
1658	C17H5O7	Unknown	Unknown	plant biochar leachate	solid phase extraction, FT-ICR-MS	solid phase extraction, FT-ICR-MS	Other	Cond Hydrocarbon	Other	Chen et al., 2022
1659	C14H9O7S	Unknown	Unknown	plant biochar leachate	solid phase extraction, FT-ICR-MS	solid phase extraction, FT-ICR-MS	Cond Hydrocarbon	Cond Hydrocarbon	Other	Chen et al., 2022
1660	C14H9O9	Unknown	Unknown	plant biochar leachate	solid phase extraction, FT-ICR-MS	solid phase extraction, FT-ICR-MS	Cond Hydrocarbon	Cond Hydrocarbon	Other	Chen et al., 2022; Yan et al., 2022
1661	C11H13O9S	Unknown	Unknown	plant biochar leachate	solid phase extraction, FT-ICR-MS	solid phase extraction, FT-ICR-MS	Tannin	Tannin	Other	Chen et al., 2022
1662	C17H9N2O3S	Unknown	Unknown	plant biochar leachate	solid phase extraction, FT-ICR-MS	solid phase extraction, FT-ICR-MS	Cond Hydrocarbon	Cond Hydrocarbon	Other	Chen et al., 2022
1663	C22H9OS	Unknown	Unknown	plant biochar leachate	solid phase extraction, FT-ICR-MS	solid phase extraction, FT-ICR-MS	Other	Cond Hydrocarbon	Other	Chen et al., 2022
1664	C10H13N2O8S	Unknown	Unknown	plant biochar leachate	solid phase extraction, FT-ICR-MS	solid phase extraction, FT-ICR-MS	Tannin	Tannin	Other	Chen et al., 2022
1665	C18H9O6	Unknown	Unknown	plant biochar leachate	solid phase extraction, FT-ICR-MS	solid phase extraction, FT-ICR-MS	Cond Hydrocarbon	Cond Hydrocarbon	Other	Chen et al., 2022; Yan et al., 2022
1666	C15H13O6S	Unknown	Unknown	plant biochar leachate	solid phase extraction, FT-ICR-MS	solid phase extraction, FT-ICR-MS	Lignin	Lignin	Other	Chen et al., 2022
1667	C11H13O11	Unknown	Unknown	plant biochar leachate	solid phase extraction, FT-ICR-MS	solid phase extraction, FT-ICR-MS	Tannin	Tannin	Other	Chen et al., 2022
1668	C15H13O8	Unknown	Unknown	plant biochar leachate	solid phase extraction, FT-ICR-MS	solid phase extraction, FT-ICR-MS	Lignin	Lignin	Other	Chen et al., 2022; Yan et al., 2022
1669	C12H17O8S	Unknown	Unknown	plant biochar leachate	solid phase extraction, FT-ICR-MS	solid phase extraction, FT-ICR-MS	Amino Sugar	Tannin	Other	Chen et al., 2022
1670	C14H13N2O7	Unknown	Unknown	plant biochar leachate	solid phase extraction, FT-ICR-MS	solid phase extraction, FT-ICR-MS	Lignin	Lignin	Protein	Chen et al., 2022; Yan et al., 2022
1671	C19H13O5	Unknown	Unknown	plant biochar leachate	solid phase extraction, FT-ICR-MS	solid phase extraction, FT-ICR-MS	Cond Hydrocarbon	Cond Hydrocarbon	Other	Chen et al., 2022; Yan et al., 2022
1672	C12H17O10	Unknown	Unknown	plant biochar leachate	solid phase extraction, FT-ICR-MS	solid phase extraction, FT-ICR-MS	Other	Tannin	Other	Chen et al., 2022; Goranov et al., 2020
1673	C16H17O7	Unknown	Unknown	plant biochar leachate	solid phase extraction, FT-ICR-MS	solid phase extraction, FT-ICR-MS	Lignin	Lignin	Other	Chen et al., 2022; Yan et al., 2022
1674	C15H17N2O6	Unknown	Unknown	plant biochar leachate	solid phase extraction, FT-ICR-MS	solid phase extraction, FT-ICR-MS	Lignin	Lignin	Protein	Chen et al., 2022; Yan et al., 2022
1675	C20H17O4	Unknown	Unknown	plant biochar leachate	solid phase extraction, FT-ICR-MS	solid phase extraction, FT-ICR-MS	Other	Lignin	Other	Chen et al., 2022; Yan et al., 2022
1676	C13H21O9	Unknown	Unknown	plant biochar leachate	solid phase extraction, FT-ICR-MS	solid phase extraction, FT-ICR-MS	Carbohydrate;Amino Sugar	Amino Sugar	Other	Chen et al., 2022
1677	C17H21O6	Unknown	Unknown	plant biochar leachate	solid phase extraction, FT-ICR-MS	solid phase extraction, FT-ICR-MS	Lignin	Lignin	Other	Chen et al., 2022; Yan et al., 2022
1678	C14H25O6S	Unknown	Unknown	plant biochar leachate	solid phase extraction, FT-ICR-MS	solid phase extraction, FT-ICR-MS	Protein	Protein	Other	Chen et al., 2022
1679	C16H21N2O5	Unknown	Unknown	plant biochar leachate	solid phase extraction, FT-ICR-MS	solid phase extraction, FT-ICR-MS	Lignin	Lignin	Other	Chen et al., 2022
1680	C18H25O5	Unknown	Unknown	plant biochar leachate	solid phase extraction, FT-ICR-MS	solid phase extraction, FT-ICR-MS	Other	Lignin	Other	Chen et al., 2022
1681	C17H25N2O4	Unknown	Unknown	plant biochar leachate	solid phase extraction, FT-ICR-MS	solid phase extraction, FT-ICR-MS	Other	Lignin	Other	Chen et al., 2022
1682	C19H29O4	Unknown	Unknown	plant biochar leachate	solid phase extraction, FT-ICR-MS	solid phase extraction, FT-ICR-MS	Other	Lipid	Other	Chen et al., 2022
1683	C16H33O4S	Unknown	Unknown	plant biochar leachate	solid phase extraction, FT-ICR-MS	solid phase extraction, FT-ICR-MS	Lipid	Lipid	Other	Chen et al., 2022
1684	C12H4NO10	Unknown	Unknown	plant biochar leachate	solid phase extraction, FT-ICR-MS	solid phase extraction, FT-ICR-MS	Other	Cond Hydrocarbon	Other	Chen et al., 2022
1685	C13H8NO9	Unknown	Unknown	plant biochar leachate	solid phase extraction, FT-ICR-MS	solid phase extraction, FT-ICR-MS	Cond Hydrocarbon	Cond Hydrocarbon	Other	Chen et al., 2022; Yan et al., 2022
1686	C17H8NO6	Unknown	Unknown	plant biochar leachate	solid phase extraction, FT-ICR-MS	solid phase extraction, FT-ICR-MS	Cond Hydrocarbon	Cond Hydrocarbon	Other	Chen et al., 2022; Yan et al., 2022
1687	C14H12NO6S	Unknown	Unknown	plant biochar leachate	solid phase extraction, FT-ICR-MS	solid phase extraction, FT-ICR-MS	Lignin	Lignin	Other	Chen et al., 2022
1688	C21H8NO3	Unknown	Unknown	plant biochar leachate	solid phase extraction, FT-ICR-MS	solid phase extraction, FT-ICR-MS	Cond Hydrocarbon	Cond Hydrocarbon	Other	Chen et al., 2022
1689	C14H12NO8	Unknown	Unknown	plant biochar leachate	solid phase extraction, FT-ICR-MS	solid phase extraction, FT-ICR-MS	Lignin	Lignin	Other	Chen et al., 2022; Yan et al., 2022
1690	C18H12NO5	Unknown	Unknown	plant biochar leachate	solid phase extraction, FT-ICR-MS	solid phase extraction, FT-ICR-MS	Cond Hydrocarbon	Cond Hydrocarbon	Other	Chen et al., 2022; Yan et al., 2022
1691	C15H16NO7	Unknown	Unknown	plant biochar leachate	solid phase extraction, FT-ICR-MS	solid phase extraction, FT-ICR-MS	Lignin	Lignin	Other	Chen et al., 2022; Yan et al., 2022
1692	C14H16N3O6	Unknown	Unknown	plant biochar leachate	solid phase extraction, FT-ICR-MS	solid phase extraction, FT-ICR-MS	Lignin	Lignin	Protein	Chen et al., 2022
1693	C19H16NO4	Unknown	Unknown	plant biochar leachate	solid phase extraction, FT-ICR-MS	solid phase extraction, FT-ICR-MS	Other	Lignin	Other	Chen et al., 2022
1694	C16H20NO6	Unknown	Unknown	plant biochar leachate	solid phase extraction, FT-ICR-MS	solid phase extraction, FT-ICR-MS	Lignin	Lignin	Other	Chen et al., 2022; Yan et al., 2022
1695	C13H24NO6S	Unknown	Unknown	plant biochar leachate	solid phase extraction, FT-ICR-MS	solid phase extraction, FT-ICR-MS	Protein	Protein	Other	Chen et al., 2022
1696	C15H20N3O5	Unknown	Unknown	plant biochar leachate	solid phase extraction, FT-ICR-MS	solid phase extraction, FT-ICR-MS	Lignin	Lignin	Protein	Chen et al., 2022
1697	C17H24NO5	Unknown	Unknown	plant biochar leachate	solid phase extraction, FT-ICR-MS	solid phase extraction, FT-ICR-MS	Lignin	Lignin	Other	Chen et al., 2022
1698	C16H24N3O4	Unknown	Unknown	plant biochar leachate	solid phase extraction, FT-ICR-MS	solid phase extraction, FT-ICR-MS	Other	Lipid	Protein	Chen et al., 2022
1699	C13H7O10	Unknown	Unknown	plant biochar leachate	solid phase extraction, FT-ICR-MS	solid phase extraction, FT-ICR-MS	Other	Cond Hydrocarbon	Other	Chen et al., 2022; Yan et al., 2022
1700	C21H7O2S	Unknown	Unknown	plant biochar leachate	solid phase extraction, FT-ICR-MS	solid phase extraction, FT-ICR-MS	Other	Cond Hydrocarbon	Other	Chen et al., 2022
1701	C17H7O7	Unknown	Unknown	plant biochar leachate	solid phase extraction, FT-ICR-MS	solid phase extraction, FT-ICR-MS	Cond Hydrocarbon	Cond Hydrocarbon	Other	Chen et al., 2022; Yan et al., 2022
1702	C21H7O4	Unknown	Unknown	plant biochar leachate	solid phase extraction, FT-ICR-MS	solid phase extraction, FT-ICR-MS	Cond Hydrocarbon	Cond Hydrocarbon	Other	Chen et al., 2022
1703	C14H11O9	Unknown	Unknown	plant biochar leachate	solid phase extraction, FT-ICR-MS	solid phase extraction, FT-ICR-MS	Cond Hydrocarbon	Cond Hydrocarbon	Other	Chen et al., 2022; Goranov et al., 2020; Yan et al., 2022
1704	C11H15O9S	Unknown	Unknown	plant biochar leachate	solid phase extraction, FT-ICR-MS	solid phase extraction, FT-ICR-MS	Other	Tannin	Other	Chen et al., 2022
1705	C13H11N2O8	Unknown	Unknown	plant biochar leachate	solid phase extraction, FT-ICR-MS	solid phase extraction, FT-ICR-MS	Lignin	Lignin	Other	Chen et al., 2022; Yan et al., 2022
1706	C18H11O6	Unknown	Unknown	plant biochar leachate	solid phase extraction, FT-ICR-MS	solid phase extraction, FT-ICR-MS	Cond Hydrocarbon	Cond Hydrocarbon	Other	Chen et al., 2022; Yan et al., 2022
1707	C15H15O8	Unknown	Unknown	plant biochar leachate	solid phase extraction, FT-ICR-MS	solid phase extraction, FT-ICR-MS	Lignin	Lignin	Other	Chen et al., 2022; Yan et al., 2022
1708	C14H15N2O7	Unknown	Unknown	plant biochar leachate	solid phase extraction, FT-ICR-MS	solid phase extraction, FT-ICR-MS	Lignin	Lignin	Protein	Chen et al., 2022; Yan et al., 2022
1709	C19H15O5	Unknown	Unknown	plant biochar leachate	solid phase extraction, FT-ICR-MS	solid phase extraction, FT-ICR-MS	Cond Hydrocarbon	Cond Hydrocarbon	Other	Chen et al., 2022; Yan et al., 2022
1710	C12H19O10	Unknown	Unknown	plant biochar leachate	solid phase extraction, FT-ICR-MS	solid phase extraction, FT-ICR-MS	Carbohydrate	Carbohydrate	Other	Chen et al., 2022
1711	C16H19O7	Unknown	Unknown	plant biochar leachate	solid phase extraction, FT-ICR-MS	solid phase extraction, FT-ICR-MS	Lignin	Lignin	Other	Chen et al., 2022; Yan et al., 2022
1712	C13H23O7S	Unknown	Unknown	plant biochar leachate	solid phase extraction, FT-ICR-MS	solid phase extraction, FT-ICR-MS	Protein	Protein	Other	Chen et al., 2022
1713	C15H19N2O6	Unknown	Unknown	plant biochar leachate	solid phase extraction, FT-ICR-MS	solid phase extraction, FT-ICR-MS	Lignin	Lignin	Protein	Chen et al., 2022; Yan et al., 2022
1714	C20H19O4	Unknown	Unknown	plant biochar leachate	solid phase extraction, FT-ICR-MS	solid phase extraction, FT-ICR-MS	Other	Lignin	Other	Chen et al., 2022
1715	C17H23O6	Unknown	Unknown	plant biochar leachate	solid phase extraction, FT-ICR-MS	solid phase extraction, FT-ICR-MS	Lignin	Lignin	Other	Chen et al., 2022; Yan et al., 2022
1716	C14H27O6S	Unknown	Unknown	plant biochar leachate	solid phase extraction, FT-ICR-MS	solid phase extraction, FT-ICR-MS	Protein	Protein	Other	Chen et al., 2022
1717	C16H23N2O5	Unknown	Unknown	plant biochar leachate	solid phase extraction, FT-ICR-MS	solid phase extraction, FT-ICR-MS	Lignin	Lignin	Other	Chen et al., 2022
1718	C18H27O5	Unknown	Unknown	plant biochar leachate	solid phase extraction, FT-ICR-MS	solid phase extraction, FT-ICR-MS	Other	Lipid	Other	Chen et al., 2022; Yan et al., 2022
1719	C17H27N2O4	Unknown	Unknown	plant biochar leachate	solid phase extraction, FT-ICR-MS	solid phase extraction, FT-ICR-MS	Lipid	Lipid	Other	Chen et al., 2022
1720	C19H31O4	Unknown	Unknown	plant biochar leachate	solid phase extraction, FT-ICR-MS	solid phase extraction, FT-ICR-MS	Lipid	Lipid	Other	Chen et al., 2022
1721	C12H6NO8S	Unknown	Unknown	plant biochar leachate	solid phase extraction, FT-ICR-MS	solid phase extraction, FT-ICR-MS	Cond Hydrocarbon	Cond Hydrocarbon	Other	Chen et al., 2022
1722	C12H6NO10	Unknown	Unknown	plant biochar leachate	solid phase extraction, FT-ICR-MS	solid phase extraction, FT-ICR-MS	Other	Cond Hydrocarbon	Other	Chen et al., 2022
1723	C16H6NO7	Unknown	Unknown	plant biochar leachate	solid phase extraction, FT-ICR-MS	solid phase extraction, FT-ICR-MS	Cond Hydrocarbon	Cond Hydrocarbon	Other	Chen et al., 2022; Yan et al., 2022
1724	C13H10NO9	Unknown	Unknown	plant biochar leachate	solid phase extraction, FT-ICR-MS	solid phase extraction, FT-ICR-MS	Tannin;Cond Hydrocarbon	Cond Hydrocarbon	Other	Chen et al., 2022; Yan et al., 2022
1725	C10H14NO9S	Unknown	Unknown	plant biochar leachate	solid phase extraction, FT-ICR-MS	solid phase extraction, FT-ICR-MS	Other	Tannin	Other	Chen et al., 2022
1726	C17H10NO6	Unknown	Unknown	plant biochar leachate	solid phase extraction, FT-ICR-MS	solid phase extraction, FT-ICR-MS	Cond Hydrocarbon	Cond Hydrocarbon	Other	Chen et al., 2022; Yan et al., 2022
1727	C14H14NO8	Unknown	Unknown	plant biochar leachate	solid phase extraction, FT-ICR-MS	solid phase extraction, FT-ICR-MS	Lignin	Lignin	Other	Chen et al., 2022; Yan et al., 2022
1728	C18H14NO5	Unknown	Unknown	plant biochar leachate	solid phase extraction, FT-ICR-MS	solid phase extraction, FT-ICR-MS	Cond Hydrocarbon	Cond Hydrocarbon	Other	Chen et al., 2022; Yan et al., 2022
1729	C15H18NO7	Unknown	Unknown	plant biochar leachate	solid phase extraction, FT-ICR-MS	solid phase extraction, FT-ICR-MS	Lignin	Lignin	Other	Chen et al., 2022; Yan et al., 2022
1730	C14H18N3O6	Unknown	Unknown	plant biochar leachate	solid phase extraction, FT-ICR-MS	solid phase extraction, FT-ICR-MS	Lignin	Lignin	Protein	Chen et al., 2022
1731	C19H18NO4	Unknown	Unknown	plant biochar leachate	solid phase extraction, FT-ICR-MS	solid phase extraction, FT-ICR-MS	Other	Lignin	Other	Chen et al., 2022; Yan et al., 2022
1732	C16H22NO6	Unknown	Unknown	plant biochar leachate	solid phase extraction, FT-ICR-MS	solid phase extraction, FT-ICR-MS	Lignin	Lignin	Other	Chen et al., 2022
1733	C15H22N3O5	Unknown	Unknown	plant biochar leachate	solid phase extraction, FT-ICR-MS	solid phase extraction, FT-ICR-MS	Protein	Lignin	Protein	Chen et al., 2022
1734	C17H26NO5	Unknown	Unknown	plant biochar leachate	solid phase extraction, FT-ICR-MS	solid phase extraction, FT-ICR-MS	Other	Lipid	Other	Chen et al., 2022
1735	C21H26NO2	Unknown	Unknown	plant biochar leachate	solid phase extraction, FT-ICR-MS	solid phase extraction, FT-ICR-MS	Unsat Hydrocarbon	Unsat Hydrocarbon	Other	Chen et al., 2022
1736	C12H5O9S	Unknown	Unknown	plant biochar leachate	solid phase extraction, FT-ICR-MS	solid phase extraction, FT-ICR-MS	Other	Cond Hydrocarbon	Other	Chen et al., 2022
1737	C12H5O11	Unknown	Unknown	plant biochar leachate	solid phase extraction, FT-ICR-MS	solid phase extraction, FT-ICR-MS	Other	Cond Hydrocarbon	Other	Chen et al., 2022; Yan et al., 2022
1738	C16H5O8	Unknown	Unknown	plant biochar leachate	solid phase extraction, FT-ICR-MS	solid phase extraction, FT-ICR-MS	Cond Hydrocarbon	Cond Hydrocarbon	Other	Chen et al., 2022
1739	C13H9O8S	Unknown	Unknown	plant biochar leachate	solid phase extraction, FT-ICR-MS	solid phase extraction, FT-ICR-MS	Cond Hydrocarbon	Cond Hydrocarbon	Other	Chen et al., 2022
1740	C13H9O10	Unknown	Unknown	plant biochar leachate	solid phase extraction, FT-ICR-MS	solid phase extraction, FT-ICR-MS	Other	Cond Hydrocarbon	Other	Chen et al., 2022; Yan et al., 2022
1741	C17H9O7	Unknown	Unknown	plant biochar leachate	solid phase extraction, FT-ICR-MS	solid phase extraction, FT-ICR-MS	Cond Hydrocarbon	Cond Hydrocarbon	Other	Chen et al., 2022; Yan et al., 2022
1742	C14H13O9	Unknown	Unknown	plant biochar leachate	solid phase extraction, FT-ICR-MS	solid phase extraction, FT-ICR-MS	Lignin	Lignin	Other	Chen et al., 2022; Yan et al., 2022
1743	C13H13N2O8	Unknown	Unknown	plant biochar leachate	solid phase extraction, FT-ICR-MS	solid phase extraction, FT-ICR-MS	Lignin	Lignin	Other	Chen et al., 2022
1744	C18H13O6	Unknown	Unknown	plant biochar leachate	solid phase extraction, FT-ICR-MS	solid phase extraction, FT-ICR-MS	Cond Hydrocarbon	Cond Hydrocarbon	Other	Chen et al., 2022; Yan et al., 2022
1745	C17H13N2O5	Unknown	Unknown	plant biochar leachate	solid phase extraction, FT-ICR-MS	solid phase extraction, FT-ICR-MS	Cond Hydrocarbon	Cond Hydrocarbon	Other	Chen et al., 2022
1746	C15H17O8	Unknown	Unknown	plant biochar leachate	solid phase extraction, FT-ICR-MS	solid phase extraction, FT-ICR-MS	Lignin	Lignin	Other	Chen et al., 2022
1747	C14H17N2O7	Unknown	Unknown	plant biochar leachate	solid phase extraction, FT-ICR-MS	solid phase extraction, FT-ICR-MS	Lignin	Lignin	Protein	Chen et al., 2022
1748	C19H17O5	Unknown	Unknown	plant biochar leachate	solid phase extraction, FT-ICR-MS	solid phase extraction, FT-ICR-MS	Other	Lignin	Other	Chen et al., 2022; Yan et al., 2022
1749	C18H17N2O4	Unknown	Unknown	plant biochar leachate	solid phase extraction, FT-ICR-MS	solid phase extraction, FT-ICR-MS	Other	Lignin	Other	Chen et al., 2022
1750	C15H21N2O4S	Unknown	Unknown	plant biochar leachate	solid phase extraction, FT-ICR-MS	solid phase extraction, FT-ICR-MS	Other	Lignin	Protein	Chen et al., 2022
1751	C16H21O7	Unknown	Unknown	plant biochar leachate	solid phase extraction, FT-ICR-MS	solid phase extraction, FT-ICR-MS	Lignin	Lignin	Other	Chen et al., 2022
1752	C15H21N2O6	Unknown	Unknown	plant biochar leachate	solid phase extraction, FT-ICR-MS	solid phase extraction, FT-ICR-MS	Lignin	Lignin	Protein	Chen et al., 2022
1753	C20H21O4	Unknown	Unknown	plant biochar leachate	solid phase extraction, FT-ICR-MS	solid phase extraction, FT-ICR-MS	Other	Lignin	Other	Chen et al., 2022
1754	C17H25O6	Unknown	Unknown	plant biochar leachate	solid phase extraction, FT-ICR-MS	solid phase extraction, FT-ICR-MS	Protein	Lignin	Other	Chen et al., 2022; Yan et al., 2022
1755	C16H25N2O5	Unknown	Unknown	plant biochar leachate	solid phase extraction, FT-ICR-MS	solid phase extraction, FT-ICR-MS	Protein	Protein	Other	Chen et al., 2022
1756	C18H29O3S	Unknown	Unknown	plant biochar leachate	solid phase extraction, FT-ICR-MS	solid phase extraction, FT-ICR-MS	Lipid	Lipid	Other	Chen et al., 2022
1757	C18H29O5	Unknown	Unknown	plant biochar leachate	solid phase extraction, FT-ICR-MS	solid phase extraction, FT-ICR-MS	Lipid	Lipid	Other	Chen et al., 2022
1758	C17H29N2O4	Unknown	Unknown	plant biochar leachate	solid phase extraction, FT-ICR-MS	solid phase extraction, FT-ICR-MS	Lipid	Lipid	Other	Chen et al., 2022
1759	C19H33O4	Unknown	Unknown	plant biochar leachate	solid phase extraction, FT-ICR-MS	solid phase extraction, FT-ICR-MS	Lipid	Lipid	Other	Chen et al., 2022
1760	C15H4NO8	Unknown	Unknown	plant biochar leachate	solid phase extraction, FT-ICR-MS	solid phase extraction, FT-ICR-MS	Other	Cond Hydrocarbon	Other	Chen et al., 2022
1761	C12H8NO10	Unknown	Unknown	plant biochar leachate	solid phase extraction, FT-ICR-MS	solid phase extraction, FT-ICR-MS	Other	Cond Hydrocarbon	Other	Chen et al., 2022
1762	C16H8NO7	Unknown	Unknown	plant biochar leachate	solid phase extraction, FT-ICR-MS	solid phase extraction, FT-ICR-MS	Cond Hydrocarbon	Cond Hydrocarbon	Other	Chen et al., 2022; Yan et al., 2022
1763	C13H12NO9	Unknown	Unknown	plant biochar leachate	solid phase extraction, FT-ICR-MS	solid phase extraction, FT-ICR-MS	Tannin	Tannin	Other	Chen et al., 2022
1764	C24H8NO	Unknown	Unknown	plant biochar leachate	solid phase extraction, FT-ICR-MS	solid phase extraction, FT-ICR-MS	Other	Cond Hydrocarbon	Other	Chen et al., 2022
1765	C17H12NO6	Unknown	Unknown	plant biochar leachate	solid phase extraction, FT-ICR-MS	solid phase extraction, FT-ICR-MS	Cond Hydrocarbon	Cond Hydrocarbon	Other	Chen et al., 2022; Yan et al., 2022
1766	C14H16NO8	Unknown	Unknown	plant biochar leachate	solid phase extraction, FT-ICR-MS	solid phase extraction, FT-ICR-MS	Lignin	Lignin	Other	Chen et al., 2022; Yan et al., 2022
1767	C13H16N3O7	Unknown	Unknown	plant biochar leachate	solid phase extraction, FT-ICR-MS	solid phase extraction, FT-ICR-MS	Lignin	Lignin	Protein	Chen et al., 2022
1768	C18H16NO5	Unknown	Unknown	plant biochar leachate	solid phase extraction, FT-ICR-MS	solid phase extraction, FT-ICR-MS	Other	Lignin	Other	Chen et al., 2022; Yan et al., 2022
1769	C15H20NO7	Unknown	Unknown	plant biochar leachate	solid phase extraction, FT-ICR-MS	solid phase extraction, FT-ICR-MS	Lignin	Lignin	Other	Chen et al., 2022
1770	C21H16N3O	Unknown	Unknown	plant biochar leachate	solid phase extraction, FT-ICR-MS	solid phase extraction, FT-ICR-MS	Other	Cond Hydrocarbon	Other	Chen et al., 2022; Yan et al., 2022
1771	C14H20N3O6	Unknown	Unknown	plant biochar leachate	solid phase extraction, FT-ICR-MS	solid phase extraction, FT-ICR-MS	Lignin	Lignin	Protein	Chen et al., 2022
1772	C19H20NO4	Unknown	Unknown	plant biochar leachate	solid phase extraction, FT-ICR-MS	solid phase extraction, FT-ICR-MS	Other	Lignin	Other	Chen et al., 2022
1773	C16H24NO6	Unknown	Unknown	plant biochar leachate	solid phase extraction, FT-ICR-MS	solid phase extraction, FT-ICR-MS	Protein	Protein	Other	Chen et al., 2022
1774	C15H24N3O5	Unknown	Unknown	plant biochar leachate	solid phase extraction, FT-ICR-MS	solid phase extraction, FT-ICR-MS	Protein	Protein	Protein	Chen et al., 2022
1775	C12H7O9S	Unknown	Unknown	plant biochar leachate	solid phase extraction, FT-ICR-MS	solid phase extraction, FT-ICR-MS	Other	Cond Hydrocarbon	Other	Chen et al., 2022
1776	C12H7O11	Unknown	Unknown	plant biochar leachate	solid phase extraction, FT-ICR-MS	solid phase extraction, FT-ICR-MS	Other	Cond Hydrocarbon	Other	Chen et al., 2022; Yan et al., 2022
1777	C16H7O8	Unknown	Unknown	plant biochar leachate	solid phase extraction, FT-ICR-MS	solid phase extraction, FT-ICR-MS	Cond Hydrocarbon	Cond Hydrocarbon	Other	Chen et al., 2022; Yan et al., 2022
1778	C13H11O8S	Unknown	Unknown	plant biochar leachate	solid phase extraction, FT-ICR-MS	solid phase extraction, FT-ICR-MS	Lignin	Lignin	Other	Chen et al., 2022
1779	C13H11O10	Unknown	Unknown	plant biochar leachate	solid phase extraction, FT-ICR-MS	solid phase extraction, FT-ICR-MS	Tannin	Tannin	Other	Chen et al., 2022; Goranov et al., 2020; Yan et al., 2022
1780	C17H11O7	Unknown	Unknown	plant biochar leachate	solid phase extraction, FT-ICR-MS	solid phase extraction, FT-ICR-MS	Cond Hydrocarbon	Cond Hydrocarbon	Other	Chen et al., 2022; Goranov et al., 2020; Yan et al., 2022
1781	C16H11N2O6	Unknown	Unknown	plant biochar leachate	solid phase extraction, FT-ICR-MS	solid phase extraction, FT-ICR-MS	Cond Hydrocarbon	Cond Hydrocarbon	Other	Chen et al., 2022; Yan et al., 2022
1782	C14H15O9	Unknown	Unknown	plant biochar leachate	solid phase extraction, FT-ICR-MS	solid phase extraction, FT-ICR-MS	Lignin	Lignin	Other	Chen et al., 2022; Yan et al., 2022
1783	C13H15N2O8	Unknown	Unknown	plant biochar leachate	solid phase extraction, FT-ICR-MS	solid phase extraction, FT-ICR-MS	Lignin	Lignin	Other	Chen et al., 2022
1784	C18H15O6	Unknown	Unknown	plant biochar leachate	solid phase extraction, FT-ICR-MS	solid phase extraction, FT-ICR-MS	Lignin	Lignin	Other	Chen et al., 2022; Goranov et al., 2020; Yan et al., 2022
1785	C17H15N2O5	Unknown	Unknown	plant biochar leachate	solid phase extraction, FT-ICR-MS	solid phase extraction, FT-ICR-MS	Lignin	Lignin	Other	Chen et al., 2022; Yan et al., 2022
1786	C15H19O8	Unknown	Unknown	plant biochar leachate	solid phase extraction, FT-ICR-MS	solid phase extraction, FT-ICR-MS	Lignin	Lignin	Other	Chen et al., 2022
1787	C14H19N2O7	Unknown	Unknown	plant biochar leachate	solid phase extraction, FT-ICR-MS	solid phase extraction, FT-ICR-MS	Lignin	Lignin	Protein	Chen et al., 2022
1788	C19H19O5	Unknown	Unknown	plant biochar leachate	solid phase extraction, FT-ICR-MS	solid phase extraction, FT-ICR-MS	Other	Lignin	Other	Chen et al., 2022; Yan et al., 2022
1789	C18H19N2O4	Unknown	Unknown	plant biochar leachate	solid phase extraction, FT-ICR-MS	solid phase extraction, FT-ICR-MS	Other	Lignin	Other	Chen et al., 2022
1790	C16H23O7	Unknown	Unknown	plant biochar leachate	solid phase extraction, FT-ICR-MS	solid phase extraction, FT-ICR-MS	Lignin	Lignin	Other	Chen et al., 2022; Yan et al., 2022
1791	C15H23N2O6	Unknown	Unknown	plant biochar leachate	solid phase extraction, FT-ICR-MS	solid phase extraction, FT-ICR-MS	Protein	Protein	Protein	Chen et al., 2022
1792	C20H23O4	Unknown	Unknown	plant biochar leachate	solid phase extraction, FT-ICR-MS	solid phase extraction, FT-ICR-MS	Other	Lignin	Other	Chen et al., 2022
1793	C19H23N2O3	Unknown	Unknown	plant biochar leachate	solid phase extraction, FT-ICR-MS	solid phase extraction, FT-ICR-MS	Other	Lignin	Other	Chen et al., 2022
1794	C17H27O6	Unknown	Unknown	plant biochar leachate	solid phase extraction, FT-ICR-MS	solid phase extraction, FT-ICR-MS	Protein	Protein	Other	Chen et al., 2022; Yan et al., 2022
1795	C16H27N2O5	Unknown	Unknown	plant biochar leachate	solid phase extraction, FT-ICR-MS	solid phase extraction, FT-ICR-MS	Protein	Protein	Other	Chen et al., 2022
1796	C18H31O5	Unknown	Unknown	plant biochar leachate	solid phase extraction, FT-ICR-MS	solid phase extraction, FT-ICR-MS	Lipid	Lipid	Other	Chen et al., 2022
1797	C23H35O	Unknown	Unknown	plant biochar leachate	solid phase extraction, FT-ICR-MS	solid phase extraction, FT-ICR-MS	Other	Lipid;Unsat Hydrocarbon	Other	Chen et al., 2022
1798	C15H6NO8	Unknown	Unknown	plant biochar leachate	solid phase extraction, FT-ICR-MS	solid phase extraction, FT-ICR-MS	Cond Hydrocarbon	Cond Hydrocarbon	Other	Chen et al., 2022; Yan et al., 2022
1799	C12H10NO10	Unknown	Unknown	plant biochar leachate	solid phase extraction, FT-ICR-MS	solid phase extraction, FT-ICR-MS	Tannin	Tannin	Other	Chen et al., 2022
1800	C16H10NO7	Unknown	Unknown	plant biochar leachate	solid phase extraction, FT-ICR-MS	solid phase extraction, FT-ICR-MS	Cond Hydrocarbon	Cond Hydrocarbon	Other	Chen et al., 2022; Yan et al., 2022
1801	C13H14NO7S	Unknown	Unknown	plant biochar leachate	solid phase extraction, FT-ICR-MS	solid phase extraction, FT-ICR-MS	Lignin	Lignin	Other	Chen et al., 2022
1802	C13H14NO9	Unknown	Unknown	plant biochar leachate	solid phase extraction, FT-ICR-MS	solid phase extraction, FT-ICR-MS	Tannin	Tannin	Other	Chen et al., 2022
1803	C24H10NO	Unknown	Unknown	plant biochar leachate	solid phase extraction, FT-ICR-MS	solid phase extraction, FT-ICR-MS	Other	Cond Hydrocarbon	Other	Chen et al., 2022
1804	C17H14NO6	Unknown	Unknown	plant biochar leachate	solid phase extraction, FT-ICR-MS	solid phase extraction, FT-ICR-MS	Lignin	Lignin	Other	Chen et al., 2022; Yan et al., 2022
1805	C14H18NO8	Unknown	Unknown	plant biochar leachate	solid phase extraction, FT-ICR-MS	solid phase extraction, FT-ICR-MS	Lignin	Lignin	Other	Chen et al., 2022
1806	C13H18N3O7	Unknown	Unknown	plant biochar leachate	solid phase extraction, FT-ICR-MS	solid phase extraction, FT-ICR-MS	Lignin	Lignin	Protein	Chen et al., 2022
1807	C18H18NO5	Unknown	Unknown	plant biochar leachate	solid phase extraction, FT-ICR-MS	solid phase extraction, FT-ICR-MS	Other	Lignin	Other	Chen et al., 2022; Yan et al., 2022
1808	C17H18N3O4	Unknown	Unknown	plant biochar leachate	solid phase extraction, FT-ICR-MS	solid phase extraction, FT-ICR-MS	Other	Lignin	Protein	Chen et al., 2022
1809	C15H22NO7	Unknown	Unknown	plant biochar leachate	solid phase extraction, FT-ICR-MS	solid phase extraction, FT-ICR-MS	Protein	Lignin	Other	Chen et al., 2022
1810	C14H22N3O6	Unknown	Unknown	plant biochar leachate	solid phase extraction, FT-ICR-MS	solid phase extraction, FT-ICR-MS	Protein	Protein	Protein	Chen et al., 2022
1811	C19H22NO4	Unknown	Unknown	plant biochar leachate	solid phase extraction, FT-ICR-MS	solid phase extraction, FT-ICR-MS	Other	Lignin	Other	Chen et al., 2022
1812	C16H26NO6	Unknown	Unknown	plant biochar leachate	solid phase extraction, FT-ICR-MS	solid phase extraction, FT-ICR-MS	Protein	Protein	Other	Chen et al., 2022
1813	C15H26N3O5	Unknown	Unknown	plant biochar leachate	solid phase extraction, FT-ICR-MS	solid phase extraction, FT-ICR-MS	Protein	Protein	Protein	Chen et al., 2022
1814	C15H5O9	Unknown	Unknown	plant biochar leachate	solid phase extraction, FT-ICR-MS	solid phase extraction, FT-ICR-MS	Cond Hydrocarbon	Cond Hydrocarbon	Other	Chen et al., 2022; Yan et al., 2022
1815	C12H9O9S	Unknown	Unknown	plant biochar leachate	solid phase extraction, FT-ICR-MS	solid phase extraction, FT-ICR-MS	Tannin	Cond Hydrocarbon	Other	Chen et al., 2022
1816	C12H9O11	Unknown	Unknown	plant biochar leachate	solid phase extraction, FT-ICR-MS	solid phase extraction, FT-ICR-MS	Tannin	Cond Hydrocarbon	Other	Chen et al., 2022; Yan et al., 2022
1817	C16H9O8	Unknown	Unknown	plant biochar leachate	solid phase extraction, FT-ICR-MS	solid phase extraction, FT-ICR-MS	Cond Hydrocarbon	Cond Hydrocarbon	Other	Chen et al., 2022; Yan et al., 2022
1818	C13H13O8S	Unknown	Unknown	plant biochar leachate	solid phase extraction, FT-ICR-MS	solid phase extraction, FT-ICR-MS	Lignin	Lignin	Other	Chen et al., 2022
1819	C15H9N2O7	Unknown	Unknown	plant biochar leachate	solid phase extraction, FT-ICR-MS	solid phase extraction, FT-ICR-MS	Cond Hydrocarbon	Cond Hydrocarbon	Other	Chen et al., 2022; Yan et al., 2022
1820	C13H13O10	Unknown	Unknown	plant biochar leachate	solid phase extraction, FT-ICR-MS	solid phase extraction, FT-ICR-MS	Tannin	Tannin	Other	Chen et al., 2022; Goranov et al., 2020
1821	C17H13O7	Unknown	Unknown	plant biochar leachate	solid phase extraction, FT-ICR-MS	solid phase extraction, FT-ICR-MS	Cond Hydrocarbon	Cond Hydrocarbon	Other	Chen et al., 2022; Goranov et al., 2020; Yan et al., 2022
1822	C16H13N2O6	Unknown	Unknown	plant biochar leachate	solid phase extraction, FT-ICR-MS	solid phase extraction, FT-ICR-MS	Lignin	Lignin	Other	Chen et al., 2022; Yan et al., 2022
1823	C14H17O9	Unknown	Unknown	plant biochar leachate	solid phase extraction, FT-ICR-MS	solid phase extraction, FT-ICR-MS	Lignin	Lignin	Other	Chen et al., 2022; Yan et al., 2022
1824	C13H17N2O8	Unknown	Unknown	plant biochar leachate	solid phase extraction, FT-ICR-MS	solid phase extraction, FT-ICR-MS	Lignin	Lignin	Other	Chen et al., 2022
1825	C18H17O6	Unknown	Unknown	plant biochar leachate	solid phase extraction, FT-ICR-MS	solid phase extraction, FT-ICR-MS	Lignin	Lignin	Other	Chen et al., 2022; Yan et al., 2022
1826	C17H17N2O5	Unknown	Unknown	plant biochar leachate	solid phase extraction, FT-ICR-MS	solid phase extraction, FT-ICR-MS	Lignin	Lignin	Other	Chen et al., 2022; Yan et al., 2022
1827	C15H21O8	Unknown	Unknown	plant biochar leachate	solid phase extraction, FT-ICR-MS	solid phase extraction, FT-ICR-MS	Lignin	Lignin	Other	Chen et al., 2022
1828	C14H21N2O7	Unknown	Unknown	plant biochar leachate	solid phase extraction, FT-ICR-MS	solid phase extraction, FT-ICR-MS	Protein	Protein	Protein	Chen et al., 2022
1829	C19H21O5	Unknown	Unknown	plant biochar leachate	solid phase extraction, FT-ICR-MS	solid phase extraction, FT-ICR-MS	Other	Lignin	Other	Chen et al., 2022; Yan et al., 2022
1830	C18H21N2O4	Unknown	Unknown	plant biochar leachate	solid phase extraction, FT-ICR-MS	solid phase extraction, FT-ICR-MS	Other	Lignin	Other	Chen et al., 2022
1831	C16H25O7	Unknown	Unknown	plant biochar leachate	solid phase extraction, FT-ICR-MS	solid phase extraction, FT-ICR-MS	Protein	Protein	Other	Chen et al., 2022; Goranov et al., 2020; Yan et al., 2022
1832	C15H25N2O6	Unknown	Unknown	plant biochar leachate	solid phase extraction, FT-ICR-MS	solid phase extraction, FT-ICR-MS	Protein	Protein	Protein	Chen et al., 2022
1833	C20H25O4	Unknown	Unknown	plant biochar leachate	solid phase extraction, FT-ICR-MS	solid phase extraction, FT-ICR-MS	Other	Lignin	Other	Chen et al., 2022
1834	C17H29O6	Unknown	Unknown	plant biochar leachate	solid phase extraction, FT-ICR-MS	solid phase extraction, FT-ICR-MS	Protein	Protein	Other	Chen et al., 2022
1835	C14H4NO9	Unknown	Unknown	plant biochar leachate	solid phase extraction, FT-ICR-MS	solid phase extraction, FT-ICR-MS	Other	Cond Hydrocarbon	Other	Chen et al., 2022
1836	C15H8NO8	Unknown	Unknown	plant biochar leachate	solid phase extraction, FT-ICR-MS	solid phase extraction, FT-ICR-MS	Cond Hydrocarbon	Cond Hydrocarbon	Other	Chen et al., 2022; Yan et al., 2022
1837	C12H12NO10	Unknown	Unknown	plant biochar leachate	solid phase extraction, FT-ICR-MS	solid phase extraction, FT-ICR-MS	Tannin	Tannin	Other	Chen et al., 2022
1838	C16H12NO7	Unknown	Unknown	plant biochar leachate	solid phase extraction, FT-ICR-MS	solid phase extraction, FT-ICR-MS	Cond Hydrocarbon	Cond Hydrocarbon	Other	Chen et al., 2022; Yan et al., 2022
1839	C15H12N3O6	Unknown	Unknown	plant biochar leachate	solid phase extraction, FT-ICR-MS	solid phase extraction, FT-ICR-MS	Cond Hydrocarbon	Lignin	Other	Chen et al., 2022; Yan et al., 2022
1840	C13H16NO9	Unknown	Unknown	plant biochar leachate	solid phase extraction, FT-ICR-MS	solid phase extraction, FT-ICR-MS	Tannin	Tannin	Other	Chen et al., 2022
1841	C17H16NO6	Unknown	Unknown	plant biochar leachate	solid phase extraction, FT-ICR-MS	solid phase extraction, FT-ICR-MS	Lignin	Lignin	Other	Chen et al., 2022; Yan et al., 2022
1842	C16H16N3O5	Unknown	Unknown	plant biochar leachate	solid phase extraction, FT-ICR-MS	solid phase extraction, FT-ICR-MS	Lignin	Lignin	Protein	Chen et al., 2022
1843	C14H20NO8	Unknown	Unknown	plant biochar leachate	solid phase extraction, FT-ICR-MS	solid phase extraction, FT-ICR-MS	Lignin;Amino Sugar	Lignin	Other	Chen et al., 2022
1844	C13H20N3O7	Unknown	Unknown	plant biochar leachate	solid phase extraction, FT-ICR-MS	solid phase extraction, FT-ICR-MS	Protein	Protein	Protein	Chen et al., 2022
1845	C18H20NO5	Unknown	Unknown	plant biochar leachate	solid phase extraction, FT-ICR-MS	solid phase extraction, FT-ICR-MS	Other	Lignin	Other	Chen et al., 2022; Yan et al., 2022
1846	C15H24NO7	Unknown	Unknown	plant biochar leachate	solid phase extraction, FT-ICR-MS	solid phase extraction, FT-ICR-MS	Protein	Protein	Other	Chen et al., 2022; Yan et al., 2022
1847	C14H24N3O6	Unknown	Unknown	plant biochar leachate	solid phase extraction, FT-ICR-MS	solid phase extraction, FT-ICR-MS	Protein	Protein	Protein	Chen et al., 2022
1848	C19H24NO4	Unknown	Unknown	plant biochar leachate	solid phase extraction, FT-ICR-MS	solid phase extraction, FT-ICR-MS	Other	Lignin	Other	Chen et al., 2022
1849	C11H7O10S	Unknown	Unknown	plant biochar leachate	solid phase extraction, FT-ICR-MS	solid phase extraction, FT-ICR-MS	Other	Cond Hydrocarbon	Other	Chen et al., 2022
1850	C15H7O9	Unknown	Unknown	plant biochar leachate	solid phase extraction, FT-ICR-MS	solid phase extraction, FT-ICR-MS	Cond Hydrocarbon	Cond Hydrocarbon	Other	Chen et al., 2022; Yan et al., 2022
1851	C12H11O9S	Unknown	Unknown	plant biochar leachate	solid phase extraction, FT-ICR-MS	solid phase extraction, FT-ICR-MS	Tannin	Tannin	Other	Chen et al., 2022
1852	C18H7N2O3S	Unknown	Unknown	plant biochar leachate	solid phase extraction, FT-ICR-MS	solid phase extraction, FT-ICR-MS	Cond Hydrocarbon	Cond Hydrocarbon	Other	Chen et al., 2022
1853	C14H7N2O8	Unknown	Unknown	plant biochar leachate	solid phase extraction, FT-ICR-MS	solid phase extraction, FT-ICR-MS	Cond Hydrocarbon	Cond Hydrocarbon	Other	Chen et al., 2022
1854	C23H7OS	Unknown	Unknown	plant biochar leachate	solid phase extraction, FT-ICR-MS	solid phase extraction, FT-ICR-MS	Other	Cond Hydrocarbon	Other	Chen et al., 2022
1855	C12H11O11	Unknown	Unknown	plant biochar leachate	solid phase extraction, FT-ICR-MS	solid phase extraction, FT-ICR-MS	Tannin	Tannin	Other	Chen et al., 2022; Goranov et al., 2020
1856	C16H11O8	Unknown	Unknown	plant biochar leachate	solid phase extraction, FT-ICR-MS	solid phase extraction, FT-ICR-MS	Cond Hydrocarbon	Cond Hydrocarbon	Other	Chen et al., 2022; Goranov et al., 2020; Yan et al., 2022
1857	C13H15O8S	Unknown	Unknown	plant biochar leachate	solid phase extraction, FT-ICR-MS	solid phase extraction, FT-ICR-MS	Lignin	Lignin	Other	Chen et al., 2022
1858	C15H11N2O7	Unknown	Unknown	plant biochar leachate	solid phase extraction, FT-ICR-MS	solid phase extraction, FT-ICR-MS	Cond Hydrocarbon	Cond Hydrocarbon	Other	Chen et al., 2022; Yan et al., 2022
1859	C20H11O5	Unknown	Unknown	plant biochar leachate	solid phase extraction, FT-ICR-MS	solid phase extraction, FT-ICR-MS	Cond Hydrocarbon	Cond Hydrocarbon	Other	Chen et al., 2022; Yan et al., 2022
1860	C13H15O10	Unknown	Unknown	plant biochar leachate	solid phase extraction, FT-ICR-MS	solid phase extraction, FT-ICR-MS	Tannin	Tannin	Other	Chen et al., 2022; Goranov et al., 2020; Yan et al., 2022
1861	C17H15O7	Unknown	Unknown	plant biochar leachate	solid phase extraction, FT-ICR-MS	solid phase extraction, FT-ICR-MS	Lignin	Lignin	Other	Chen et al., 2022; Yan et al., 2022
1862	C16H15N2O6	Unknown	Unknown	plant biochar leachate	solid phase extraction, FT-ICR-MS	solid phase extraction, FT-ICR-MS	Lignin	Lignin	Other	Chen et al., 2022; Yan et al., 2022
1863	C21H15O4	Unknown	Unknown	plant biochar leachate	solid phase extraction, FT-ICR-MS	solid phase extraction, FT-ICR-MS	Cond Hydrocarbon	Cond Hydrocarbon	Other	Chen et al., 2022; Yan et al., 2022
1864	C14H19O9	Unknown	Unknown	plant biochar leachate	solid phase extraction, FT-ICR-MS	solid phase extraction, FT-ICR-MS	Lignin;Amino Sugar	Lignin	Other	Chen et al., 2022
1865	C13H19N2O8	Unknown	Unknown	plant biochar leachate	solid phase extraction, FT-ICR-MS	solid phase extraction, FT-ICR-MS	Amino Sugar	Lignin	Other	Chen et al., 2022
1866	C18H19O6	Unknown	Unknown	plant biochar leachate	solid phase extraction, FT-ICR-MS	solid phase extraction, FT-ICR-MS	Lignin	Lignin	Other	Chen et al., 2022; Yan et al., 2022
1867	C17H19N2O5	Unknown	Unknown	plant biochar leachate	solid phase extraction, FT-ICR-MS	solid phase extraction, FT-ICR-MS	Lignin	Lignin	Other	Chen et al., 2022; Yan et al., 2022
1868	C15H23O8	Unknown	Unknown	plant biochar leachate	solid phase extraction, FT-ICR-MS	solid phase extraction, FT-ICR-MS	Protein	Protein	Other	Chen et al., 2022
1869	C14H23N2O7	Unknown	Unknown	plant biochar leachate	solid phase extraction, FT-ICR-MS	solid phase extraction, FT-ICR-MS	Protein	Protein	Protein	Chen et al., 2022
1870	C19H23O5	Unknown	Unknown	plant biochar leachate	solid phase extraction, FT-ICR-MS	solid phase extraction, FT-ICR-MS	Other	Lignin	Other	Chen et al., 2022
1871	C18H23N2O4	Unknown	Unknown	plant biochar leachate	solid phase extraction, FT-ICR-MS	solid phase extraction, FT-ICR-MS	Other	Lignin	Other	Chen et al., 2022
1872	C16H27O7	Unknown	Unknown	plant biochar leachate	solid phase extraction, FT-ICR-MS	solid phase extraction, FT-ICR-MS	Protein	Protein	Other	Chen et al., 2022
1873	C20H27O4	Unknown	Unknown	plant biochar leachate	solid phase extraction, FT-ICR-MS	solid phase extraction, FT-ICR-MS	Other	Lignin	Other	Chen et al., 2022
1874	C18H35O3S	Unknown	Unknown	plant biochar leachate	solid phase extraction, FT-ICR-MS	solid phase extraction, FT-ICR-MS	Lipid	Lipid	Other	Chen et al., 2022
1875	C14H6NO9	Unknown	Unknown	plant biochar leachate	solid phase extraction, FT-ICR-MS	solid phase extraction, FT-ICR-MS	Cond Hydrocarbon	Cond Hydrocarbon	Other	Chen et al., 2022; Yan et al., 2022
1876	C15H10NO8	Unknown	Unknown	plant biochar leachate	solid phase extraction, FT-ICR-MS	solid phase extraction, FT-ICR-MS	Cond Hydrocarbon	Cond Hydrocarbon	Other	Chen et al., 2022; Yan et al., 2022
1877	C19H10NO5	Unknown	Unknown	plant biochar leachate	solid phase extraction, FT-ICR-MS	solid phase extraction, FT-ICR-MS	Cond Hydrocarbon	Cond Hydrocarbon	Other	Chen et al., 2022; Yan et al., 2022
1878	C12H14NO10	Unknown	Unknown	plant biochar leachate	solid phase extraction, FT-ICR-MS	solid phase extraction, FT-ICR-MS	Tannin	Tannin	Other	Chen et al., 2022
1879	C16H14NO7	Unknown	Unknown	plant biochar leachate	solid phase extraction, FT-ICR-MS	solid phase extraction, FT-ICR-MS	Lignin	Lignin	Other	Chen et al., 2022; Yan et al., 2022
1880	C15H14N3O6	Unknown	Unknown	plant biochar leachate	solid phase extraction, FT-ICR-MS	solid phase extraction, FT-ICR-MS	Lignin	Lignin	Protein	Chen et al., 2022; Yan et al., 2022
1881	C20H14NO4	Unknown	Unknown	plant biochar leachate	solid phase extraction, FT-ICR-MS	solid phase extraction, FT-ICR-MS	Cond Hydrocarbon	Cond Hydrocarbon	Other	Chen et al., 2022
1882	C13H18NO9	Unknown	Unknown	plant biochar leachate	solid phase extraction, FT-ICR-MS	solid phase extraction, FT-ICR-MS	Amino Sugar	Tannin	Other	Chen et al., 2022
1883	C24H14NO	Unknown	Unknown	plant biochar leachate	solid phase extraction, FT-ICR-MS	solid phase extraction, FT-ICR-MS	Other	Cond Hydrocarbon	Other	Chen et al., 2022
1884	C17H18NO6	Unknown	Unknown	plant biochar leachate	solid phase extraction, FT-ICR-MS	solid phase extraction, FT-ICR-MS	Lignin	Lignin	Other	Chen et al., 2022; Yan et al., 2022
1885	C16H18N3O5	Unknown	Unknown	plant biochar leachate	solid phase extraction, FT-ICR-MS	solid phase extraction, FT-ICR-MS	Lignin	Lignin	Protein	Chen et al., 2022
1886	C14H22NO8	Unknown	Unknown	plant biochar leachate	solid phase extraction, FT-ICR-MS	solid phase extraction, FT-ICR-MS	Amino Sugar	Amino Sugar	Other	Chen et al., 2022
1887	C18H22NO5	Unknown	Unknown	plant biochar leachate	solid phase extraction, FT-ICR-MS	solid phase extraction, FT-ICR-MS	Other	Lignin	Other	Chen et al., 2022; Yan et al., 2022
1888	C17H22N3O4	Unknown	Unknown	plant biochar leachate	solid phase extraction, FT-ICR-MS	solid phase extraction, FT-ICR-MS	Other	Lignin	Protein	Chen et al., 2022
1889	C19H26NO4	Unknown	Unknown	plant biochar leachate	solid phase extraction, FT-ICR-MS	solid phase extraction, FT-ICR-MS	Other	Lignin	Other	Chen et al., 2022
1890	C10H5O11S	Unknown	Unknown	plant biochar leachate	solid phase extraction, FT-ICR-MS	solid phase extraction, FT-ICR-MS	Other	Other	Other	Chen et al., 2022
1891	C14H5O10	Unknown	Unknown	plant biochar leachate	solid phase extraction, FT-ICR-MS	solid phase extraction, FT-ICR-MS	Other	Cond Hydrocarbon	Other	Chen et al., 2022; Yan et al., 2022
1892	C11H9O10S	Unknown	Unknown	plant biochar leachate	solid phase extraction, FT-ICR-MS	solid phase extraction, FT-ICR-MS	Tannin	Tannin	Other	Chen et al., 2022
1893	C17H5N2O4S	Unknown	Unknown	plant biochar leachate	solid phase extraction, FT-ICR-MS	solid phase extraction, FT-ICR-MS	Other	Cond Hydrocarbon	Other	Chen et al., 2022
1894	C15H9O9	Unknown	Unknown	plant biochar leachate	solid phase extraction, FT-ICR-MS	solid phase extraction, FT-ICR-MS	Cond Hydrocarbon	Cond Hydrocarbon	Other	Chen et al., 2022; Goranov et al., 2020; Yan et al., 2022
1895	C12H13O9S	Unknown	Unknown	plant biochar leachate	solid phase extraction, FT-ICR-MS	solid phase extraction, FT-ICR-MS	Tannin	Tannin	Other	Chen et al., 2022
1896	C14H9N2O8	Unknown	Unknown	plant biochar leachate	solid phase extraction, FT-ICR-MS	solid phase extraction, FT-ICR-MS	Cond Hydrocarbon	Cond Hydrocarbon	Other	Chen et al., 2022; Yan et al., 2022
1897	C23H9OS	Unknown	Unknown	plant biochar leachate	solid phase extraction, FT-ICR-MS	solid phase extraction, FT-ICR-MS	Other	Cond Hydrocarbon	Other	Chen et al., 2022
1898	C19H9O6	Unknown	Unknown	plant biochar leachate	solid phase extraction, FT-ICR-MS	solid phase extraction, FT-ICR-MS	Cond Hydrocarbon	Cond Hydrocarbon	Other	Chen et al., 2022; Yan et al., 2022
1899	C12H13O11	Unknown	Unknown	plant biochar leachate	solid phase extraction, FT-ICR-MS	solid phase extraction, FT-ICR-MS	Tannin	Tannin	Other	Chen et al., 2022; Goranov et al., 2020
1900	C16H13O8	Unknown	Unknown	plant biochar leachate	solid phase extraction, FT-ICR-MS	solid phase extraction, FT-ICR-MS	Lignin	Lignin	Other	Chen et al., 2022; Goranov et al., 2020; Yan et al., 2022
1901	C15H13N2O7	Unknown	Unknown	plant biochar leachate	solid phase extraction, FT-ICR-MS	solid phase extraction, FT-ICR-MS	Lignin	Lignin	Other	Chen et al., 2022; Yan et al., 2022
1902	C20H13O5	Unknown	Unknown	plant biochar leachate	solid phase extraction, FT-ICR-MS	solid phase extraction, FT-ICR-MS	Cond Hydrocarbon	Cond Hydrocarbon	Other	Chen et al., 2022; Yan et al., 2022
1903	C13H17O10	Unknown	Unknown	plant biochar leachate	solid phase extraction, FT-ICR-MS	solid phase extraction, FT-ICR-MS	Other	Tannin	Other	Chen et al., 2022; Goranov et al., 2020; Yan et al., 2022
1904	C17H17O7	Unknown	Unknown	plant biochar leachate	solid phase extraction, FT-ICR-MS	solid phase extraction, FT-ICR-MS	Lignin	Lignin	Other	Chen et al., 2022; Yan et al., 2022
1905	C23H13N2O	Unknown	Unknown	plant biochar leachate	solid phase extraction, FT-ICR-MS	solid phase extraction, FT-ICR-MS	Other	Cond Hydrocarbon	Other	Chen et al., 2022; Yan et al., 2022
1906	C16H17N2O6	Unknown	Unknown	plant biochar leachate	solid phase extraction, FT-ICR-MS	solid phase extraction, FT-ICR-MS	Lignin	Lignin	Other	Chen et al., 2022; Yan et al., 2022
1907	C21H17O4	Unknown	Unknown	plant biochar leachate	solid phase extraction, FT-ICR-MS	solid phase extraction, FT-ICR-MS	Cond Hydrocarbon	Lignin	Other	Chen et al., 2022; Goranov et al., 2020; Yan et al., 2022
1908	C14H21O9	Unknown	Unknown	plant biochar leachate	solid phase extraction, FT-ICR-MS	solid phase extraction, FT-ICR-MS	Amino Sugar	Amino Sugar	Other	Chen et al., 2022
1909	C18H21O6	Unknown	Unknown	plant biochar leachate	solid phase extraction, FT-ICR-MS	solid phase extraction, FT-ICR-MS	Lignin	Lignin	Other	Chen et al., 2022; Yan et al., 2022
1910	C17H21N2O5	Unknown	Unknown	plant biochar leachate	solid phase extraction, FT-ICR-MS	solid phase extraction, FT-ICR-MS	Lignin	Lignin	Other	Chen et al., 2022
1911	C15H25O8	Unknown	Unknown	plant biochar leachate	solid phase extraction, FT-ICR-MS	solid phase extraction, FT-ICR-MS	Protein	Protein	Other	Chen et al., 2022
1912	C19H25O5	Unknown	Unknown	plant biochar leachate	solid phase extraction, FT-ICR-MS	solid phase extraction, FT-ICR-MS	Other	Lignin	Other	Chen et al., 2022
1913	C18H25N2O4	Unknown	Unknown	plant biochar leachate	solid phase extraction, FT-ICR-MS	solid phase extraction, FT-ICR-MS	Other	Lignin	Other	Chen et al., 2022
1914	C20H29O4	Unknown	Unknown	plant biochar leachate	solid phase extraction, FT-ICR-MS	solid phase extraction, FT-ICR-MS	Other	Lignin	Other	Chen et al., 2022
1915	C13H4NO8S	Unknown	Unknown	plant biochar leachate	solid phase extraction, FT-ICR-MS	solid phase extraction, FT-ICR-MS	Cond Hydrocarbon	Cond Hydrocarbon	Other	Chen et al., 2022
1916	C12H4N3O9	Unknown	Unknown	plant biochar leachate	solid phase extraction, FT-ICR-MS	solid phase extraction, FT-ICR-MS	Other	Cond Hydrocarbon	Other	Chen et al., 2022
1917	C9H8N3O9S	Unknown	Unknown	plant biochar leachate	solid phase extraction, FT-ICR-MS	solid phase extraction, FT-ICR-MS	Tannin	Tannin	Other	Chen et al., 2022
1918	C14H8NO9	Unknown	Unknown	plant biochar leachate	solid phase extraction, FT-ICR-MS	solid phase extraction, FT-ICR-MS	Cond Hydrocarbon	Cond Hydrocarbon	Other	Chen et al., 2022; Yan et al., 2022
1919	C13H8N3O8	Unknown	Unknown	plant biochar leachate	solid phase extraction, FT-ICR-MS	solid phase extraction, FT-ICR-MS	Cond Hydrocarbon	Cond Hydrocarbon	Other	Chen et al., 2022
1920	C22H8NOS	Unknown	Unknown	plant biochar leachate	solid phase extraction, FT-ICR-MS	solid phase extraction, FT-ICR-MS	Other	Cond Hydrocarbon	Other	Chen et al., 2022
1921	C10H12N3O8S	Unknown	Unknown	plant biochar leachate	solid phase extraction, FT-ICR-MS	solid phase extraction, FT-ICR-MS	Tannin	Tannin	Other	Chen et al., 2022
1922	C18H8NO6	Unknown	Unknown	plant biochar leachate	solid phase extraction, FT-ICR-MS	solid phase extraction, FT-ICR-MS	Cond Hydrocarbon	Cond Hydrocarbon	Other	Chen et al., 2022; Yan et al., 2022
1923	C15H12NO6S	Unknown	Unknown	plant biochar leachate	solid phase extraction, FT-ICR-MS	solid phase extraction, FT-ICR-MS	Cond Hydrocarbon	Lignin	Other	Chen et al., 2022
1924	C17H8N3O5	Unknown	Unknown	plant biochar leachate	solid phase extraction, FT-ICR-MS	solid phase extraction, FT-ICR-MS	Cond Hydrocarbon	Cond Hydrocarbon	Other	Chen et al., 2022
1925	C10H12N3O10	Unknown	Unknown	plant biochar leachate	solid phase extraction, FT-ICR-MS	solid phase extraction, FT-ICR-MS	Tannin	Tannin	Other	Chen et al., 2022
1926	C15H12NO8	Unknown	Unknown	plant biochar leachate	solid phase extraction, FT-ICR-MS	solid phase extraction, FT-ICR-MS	Cond Hydrocarbon	Lignin	Other	Chen et al., 2022; Yan et al., 2022
1927	C12H16NO8S	Unknown	Unknown	plant biochar leachate	solid phase extraction, FT-ICR-MS	solid phase extraction, FT-ICR-MS	Other	Tannin	Other	Chen et al., 2022
1928	C19H12NO5	Unknown	Unknown	plant biochar leachate	solid phase extraction, FT-ICR-MS	solid phase extraction, FT-ICR-MS	Cond Hydrocarbon	Cond Hydrocarbon	Other	Chen et al., 2022; Yan et al., 2022
1929	C12H16NO10	Unknown	Unknown	plant biochar leachate	solid phase extraction, FT-ICR-MS	solid phase extraction, FT-ICR-MS	Other	Tannin	Other	Chen et al., 2022
1930	C20H16NO2S	Unknown	Unknown	plant biochar leachate	solid phase extraction, FT-ICR-MS	solid phase extraction, FT-ICR-MS	Unsat Hydrocarbon	Unsat Hydrocarbon	Other	Chen et al., 2022
1931	C16H16NO7	Unknown	Unknown	plant biochar leachate	solid phase extraction, FT-ICR-MS	solid phase extraction, FT-ICR-MS	Lignin	Lignin	Other	Chen et al., 2022; Yan et al., 2022
1932	C15H16N3O6	Unknown	Unknown	plant biochar leachate	solid phase extraction, FT-ICR-MS	solid phase extraction, FT-ICR-MS	Lignin	Lignin	Protein	Chen et al., 2022
1933	C12H20N3O6S	Unknown	Unknown	plant biochar leachate	solid phase extraction, FT-ICR-MS	solid phase extraction, FT-ICR-MS	Protein	Protein	Protein	Chen et al., 2022
1934	C20H16NO4	Unknown	Unknown	plant biochar leachate	solid phase extraction, FT-ICR-MS	solid phase extraction, FT-ICR-MS	Cond Hydrocarbon	Lignin	Other	Chen et al., 2022
1935	C17H20NO4S	Unknown	Unknown	plant biochar leachate	solid phase extraction, FT-ICR-MS	solid phase extraction, FT-ICR-MS	Other	Lignin	Other	Chen et al., 2022
1936	C13H20NO9	Unknown	Unknown	plant biochar leachate	solid phase extraction, FT-ICR-MS	solid phase extraction, FT-ICR-MS	Carbohydrate;Amino Sugar	Amino Sugar	Other	Chen et al., 2022
1937	C17H20NO6	Unknown	Unknown	plant biochar leachate	solid phase extraction, FT-ICR-MS	solid phase extraction, FT-ICR-MS	Lignin	Lignin	Other	Chen et al., 2022; Yan et al., 2022
1938	C16H20N3O5	Unknown	Unknown	plant biochar leachate	solid phase extraction, FT-ICR-MS	solid phase extraction, FT-ICR-MS	Lignin	Lignin	Protein	Chen et al., 2022
1939	C18H24NO5	Unknown	Unknown	plant biochar leachate	solid phase extraction, FT-ICR-MS	solid phase extraction, FT-ICR-MS	Other	Lignin	Other	Chen et al., 2022
1940	C10H7O11S	Unknown	Unknown	plant biochar leachate	solid phase extraction, FT-ICR-MS	solid phase extraction, FT-ICR-MS	Other	Other	Other	Chen et al., 2022
1941	C14H7O8S	Unknown	Unknown	plant biochar leachate	solid phase extraction, FT-ICR-MS	solid phase extraction, FT-ICR-MS	Cond Hydrocarbon	Cond Hydrocarbon	Other	Chen et al., 2022
1942	C14H7O10	Unknown	Unknown	plant biochar leachate	solid phase extraction, FT-ICR-MS	solid phase extraction, FT-ICR-MS	Other	Cond Hydrocarbon	Other	Chen et al., 2022; Yan et al., 2022
1943	C11H11O10S	Unknown	Unknown	plant biochar leachate	solid phase extraction, FT-ICR-MS	solid phase extraction, FT-ICR-MS	Tannin	Tannin	Other	Chen et al., 2022
1944	C17H7N2O4S	Unknown	Unknown	plant biochar leachate	solid phase extraction, FT-ICR-MS	solid phase extraction, FT-ICR-MS	Cond Hydrocarbon	Cond Hydrocarbon	Other	Chen et al., 2022
1945	C13H7N2O9	Unknown	Unknown	plant biochar leachate	solid phase extraction, FT-ICR-MS	solid phase extraction, FT-ICR-MS	Cond Hydrocarbon	Cond Hydrocarbon	Other	Chen et al., 2022
1946	C18H7O7	Unknown	Unknown	plant biochar leachate	solid phase extraction, FT-ICR-MS	solid phase extraction, FT-ICR-MS	Cond Hydrocarbon	Cond Hydrocarbon	Other	Chen et al., 2022; Yan et al., 2022
1947	C15H11O9	Unknown	Unknown	plant biochar leachate	solid phase extraction, FT-ICR-MS	solid phase extraction, FT-ICR-MS	Cond Hydrocarbon	Cond Hydrocarbon	Other	Chen et al., 2022; Yan et al., 2022
1948	C12H15O9S	Unknown	Unknown	plant biochar leachate	solid phase extraction, FT-ICR-MS	solid phase extraction, FT-ICR-MS	Tannin	Tannin	Other	Chen et al., 2022
1949	C14H11N2O8	Unknown	Unknown	plant biochar leachate	solid phase extraction, FT-ICR-MS	solid phase extraction, FT-ICR-MS	Cond Hydrocarbon	Cond Hydrocarbon	Other	Chen et al., 2022; Yan et al., 2022
1950	C19H11O6	Unknown	Unknown	plant biochar leachate	solid phase extraction, FT-ICR-MS	solid phase extraction, FT-ICR-MS	Cond Hydrocarbon	Cond Hydrocarbon	Other	Chen et al., 2022; Yan et al., 2022
1951	C12H15O11	Unknown	Unknown	plant biochar leachate	solid phase extraction, FT-ICR-MS	solid phase extraction, FT-ICR-MS	Tannin	Tannin	Other	Chen et al., 2022; Goranov et al., 2020
1952	C16H15O8	Unknown	Unknown	plant biochar leachate	solid phase extraction, FT-ICR-MS	solid phase extraction, FT-ICR-MS	Lignin	Lignin	Other	Chen et al., 2022; Goranov et al., 2020; Yan et al., 2022
1953	C15H15N2O7	Unknown	Unknown	plant biochar leachate	solid phase extraction, FT-ICR-MS	solid phase extraction, FT-ICR-MS	Lignin	Lignin	Protein	Chen et al., 2022; Yan et al., 2022
1954	C20H15O5	Unknown	Unknown	plant biochar leachate	solid phase extraction, FT-ICR-MS	solid phase extraction, FT-ICR-MS	Cond Hydrocarbon	Cond Hydrocarbon	Other	Chen et al., 2022; Yan et al., 2022
1955	C13H19O10	Unknown	Unknown	plant biochar leachate	solid phase extraction, FT-ICR-MS	solid phase extraction, FT-ICR-MS	Other	Tannin	Other	Chen et al., 2022
1956	C17H19O7	Unknown	Unknown	plant biochar leachate	solid phase extraction, FT-ICR-MS	solid phase extraction, FT-ICR-MS	Lignin	Lignin	Other	Chen et al., 2022; Yan et al., 2022
1957	C16H19N2O6	Unknown	Unknown	plant biochar leachate	solid phase extraction, FT-ICR-MS	solid phase extraction, FT-ICR-MS	Lignin	Lignin	Other	Chen et al., 2022; Yan et al., 2022
1958	C21H19O4	Unknown	Unknown	plant biochar leachate	solid phase extraction, FT-ICR-MS	solid phase extraction, FT-ICR-MS	Other	Lignin	Other	Chen et al., 2022; Yan et al., 2022
1959	C14H23O9	Unknown	Unknown	plant biochar leachate	solid phase extraction, FT-ICR-MS	solid phase extraction, FT-ICR-MS	Amino Sugar	Amino Sugar	Other	Chen et al., 2022
1960	C18H23O6	Unknown	Unknown	plant biochar leachate	solid phase extraction, FT-ICR-MS	solid phase extraction, FT-ICR-MS	Lignin	Lignin	Other	Chen et al., 2022; Yan et al., 2022
1961	C17H23N2O5	Unknown	Unknown	plant biochar leachate	solid phase extraction, FT-ICR-MS	solid phase extraction, FT-ICR-MS	Lignin	Lignin	Other	Chen et al., 2022
1962	C19H27O5	Unknown	Unknown	plant biochar leachate	solid phase extraction, FT-ICR-MS	solid phase extraction, FT-ICR-MS	Other	Lignin	Other	Chen et al., 2022
1963	C18H27N2O4	Unknown	Unknown	plant biochar leachate	solid phase extraction, FT-ICR-MS	solid phase extraction, FT-ICR-MS	Other	Lipid	Other	Chen et al., 2022
1964	C20H31O4	Unknown	Unknown	plant biochar leachate	solid phase extraction, FT-ICR-MS	solid phase extraction, FT-ICR-MS	Lipid	Lipid	Other	Chen et al., 2022
1965	C17H6NO5S	Unknown	Unknown	plant biochar leachate	solid phase extraction, FT-ICR-MS	solid phase extraction, FT-ICR-MS	Cond Hydrocarbon	Cond Hydrocarbon	Other	Chen et al., 2022
1966	C13H6NO10	Unknown	Unknown	plant biochar leachate	solid phase extraction, FT-ICR-MS	solid phase extraction, FT-ICR-MS	Other	Cond Hydrocarbon	Other	Chen et al., 2022
1967	C17H6NO7	Unknown	Unknown	plant biochar leachate	solid phase extraction, FT-ICR-MS	solid phase extraction, FT-ICR-MS	Cond Hydrocarbon	Cond Hydrocarbon	Other	Chen et al., 2022; Yan et al., 2022
1968	C14H10NO9	Unknown	Unknown	plant biochar leachate	solid phase extraction, FT-ICR-MS	solid phase extraction, FT-ICR-MS	Cond Hydrocarbon	Cond Hydrocarbon	Other	Chen et al., 2022; Yan et al., 2022
1969	C18H10NO6	Unknown	Unknown	plant biochar leachate	solid phase extraction, FT-ICR-MS	solid phase extraction, FT-ICR-MS	Cond Hydrocarbon	Cond Hydrocarbon	Other	Chen et al., 2022; Yan et al., 2022
1970	C15H14NO8	Unknown	Unknown	plant biochar leachate	solid phase extraction, FT-ICR-MS	solid phase extraction, FT-ICR-MS	Lignin	Lignin	Other	Chen et al., 2022; Yan et al., 2022
1971	C19H14NO5	Unknown	Unknown	plant biochar leachate	solid phase extraction, FT-ICR-MS	solid phase extraction, FT-ICR-MS	Cond Hydrocarbon	Cond Hydrocarbon	Other	Chen et al., 2022; Yan et al., 2022
1972	C16H18NO7	Unknown	Unknown	plant biochar leachate	solid phase extraction, FT-ICR-MS	solid phase extraction, FT-ICR-MS	Lignin	Lignin	Other	Chen et al., 2022; Yan et al., 2022
1973	C15H18N3O6	Unknown	Unknown	plant biochar leachate	solid phase extraction, FT-ICR-MS	solid phase extraction, FT-ICR-MS	Lignin	Lignin	Protein	Chen et al., 2022; Yan et al., 2022
1974	C20H18NO4	Unknown	Unknown	plant biochar leachate	solid phase extraction, FT-ICR-MS	solid phase extraction, FT-ICR-MS	Other	Lignin	Other	Chen et al., 2022
1975	C17H22NO6	Unknown	Unknown	plant biochar leachate	solid phase extraction, FT-ICR-MS	solid phase extraction, FT-ICR-MS	Lignin	Lignin	Other	Chen et al., 2022
1976	C16H22N3O5	Unknown	Unknown	plant biochar leachate	solid phase extraction, FT-ICR-MS	solid phase extraction, FT-ICR-MS	Lignin	Lignin	Protein	Chen et al., 2022
1977	C18H26NO5	Unknown	Unknown	plant biochar leachate	solid phase extraction, FT-ICR-MS	solid phase extraction, FT-ICR-MS	Other	Lignin	Other	Chen et al., 2022
1978	C13H5O11	Unknown	Unknown	plant biochar leachate	solid phase extraction, FT-ICR-MS	solid phase extraction, FT-ICR-MS	Other	Cond Hydrocarbon	Other	Chen et al., 2022; Yan et al., 2022
1979	C16H5N2O5S	Unknown	Unknown	plant biochar leachate	solid phase extraction, FT-ICR-MS	solid phase extraction, FT-ICR-MS	Cond Hydrocarbon	Cond Hydrocarbon	Other	Chen et al., 2022
1980	C17H5O8	Unknown	Unknown	plant biochar leachate	solid phase extraction, FT-ICR-MS	solid phase extraction, FT-ICR-MS	Other	Cond Hydrocarbon	Other	Chen et al., 2022
1981	C14H9O10	Unknown	Unknown	plant biochar leachate	solid phase extraction, FT-ICR-MS	solid phase extraction, FT-ICR-MS	Other	Cond Hydrocarbon	Other	Chen et al., 2022; Yan et al., 2022
1982	C18H9O7	Unknown	Unknown	plant biochar leachate	solid phase extraction, FT-ICR-MS	solid phase extraction, FT-ICR-MS	Cond Hydrocarbon	Cond Hydrocarbon	Other	Chen et al., 2022; Yan et al., 2022
1983	C15H13O9	Unknown	Unknown	plant biochar leachate	solid phase extraction, FT-ICR-MS	solid phase extraction, FT-ICR-MS	Lignin	Lignin	Other	Chen et al., 2022; Yan et al., 2022
1984	C14H13N2O8	Unknown	Unknown	plant biochar leachate	solid phase extraction, FT-ICR-MS	solid phase extraction, FT-ICR-MS	Lignin	Lignin	Protein	Chen et al., 2022; Yan et al., 2022
1985	C19H13O6	Unknown	Unknown	plant biochar leachate	solid phase extraction, FT-ICR-MS	solid phase extraction, FT-ICR-MS	Cond Hydrocarbon	Cond Hydrocarbon	Other	Chen et al., 2022; Yan et al., 2022
1986	C12H17O11	Unknown	Unknown	plant biochar leachate	solid phase extraction, FT-ICR-MS	solid phase extraction, FT-ICR-MS	Other	Tannin	Other	Chen et al., 2022
1987	C16H17O8	Unknown	Unknown	plant biochar leachate	solid phase extraction, FT-ICR-MS	solid phase extraction, FT-ICR-MS	Lignin	Lignin	Other	Chen et al., 2022; Yan et al., 2022
1988	C15H17N2O7	Unknown	Unknown	plant biochar leachate	solid phase extraction, FT-ICR-MS	solid phase extraction, FT-ICR-MS	Lignin	Lignin	Protein	Chen et al., 2022; Yan et al., 2022
1989	C20H17O5	Unknown	Unknown	plant biochar leachate	solid phase extraction, FT-ICR-MS	solid phase extraction, FT-ICR-MS	Other	Lignin	Other	Chen et al., 2022; Yan et al., 2022
1990	C13H21O10	Unknown	Unknown	plant biochar leachate	solid phase extraction, FT-ICR-MS	solid phase extraction, FT-ICR-MS	Carbohydrate	Carbohydrate	Other	Chen et al., 2022; Goranov et al., 2020
1991	C19H17N2O4	Unknown	Unknown	plant biochar leachate	solid phase extraction, FT-ICR-MS	solid phase extraction, FT-ICR-MS	Other	Lignin	Other	Chen et al., 2022
1992	C17H21O7	Unknown	Unknown	plant biochar leachate	solid phase extraction, FT-ICR-MS	solid phase extraction, FT-ICR-MS	Lignin	Lignin	Other	Chen et al., 2022; Yan et al., 2022
1993	C16H21N2O6	Unknown	Unknown	plant biochar leachate	solid phase extraction, FT-ICR-MS	solid phase extraction, FT-ICR-MS	Lignin	Lignin	Other	Chen et al., 2022
1994	C21H21O4	Unknown	Unknown	plant biochar leachate	solid phase extraction, FT-ICR-MS	solid phase extraction, FT-ICR-MS	Other	Lignin	Other	Chen et al., 2022
1995	C18H25O6	Unknown	Unknown	plant biochar leachate	solid phase extraction, FT-ICR-MS	solid phase extraction, FT-ICR-MS	Lignin	Lignin	Other	Chen et al., 2022
1996	C17H25N2O5	Unknown	Unknown	plant biochar leachate	solid phase extraction, FT-ICR-MS	solid phase extraction, FT-ICR-MS	Other	Lignin	Other	Chen et al., 2022; Yan et al., 2022
1997	C19H29O5	Unknown	Unknown	plant biochar leachate	solid phase extraction, FT-ICR-MS	solid phase extraction, FT-ICR-MS	Other	Lipid	Other	Chen et al., 2022
1998	C16H33O5S	Unknown	Unknown	plant biochar leachate	solid phase extraction, FT-ICR-MS	solid phase extraction, FT-ICR-MS	Other	Protein	Other	Chen et al., 2022
[truncated: 14,973 more rows]

## Sheet: Table S2 Complete MF Model Out
Molecular Formula	Source	Literature Assigned Compound Class	Compound Class Assigned as in Kim et al 2003	Compound Class Assigned as in Bailey et al 2017	CCompound Class Assigned as in Rivas Ubach et al 2018	𝚫GCox	𝚫Gd	𝚫GCat	𝚫Gan	𝚫Gdis	λ	CUE	Aerobic Respiration	Aerobic Respiration, C limited	Aerobic Respiration, O limited
C6H6O2	smoke particles, woody char leachates Lignin	Phenols, Phenol	Lignin	Lignin	Other	-143.287	-859.723	-3011.77	-11.7541	465.116	0.15053	0.525436	0.970321	0.00176018	0.129566
C7H6O2	smoke particles Lignin	Phenols	Lignin	Lignin	Other	-142.742	-999.192	-3482.33	-7.2672	465.116	0.131478	0.52074	0.970422	0.00413077	0.130684
C7H6O3	smoke particles Lignin	Phenols	Lignin	Lignin	Other	-139.469	-976.285	-3293.88	-3.87346	465.116	0.14003	0.492559	0.942904	0.00293692	0.134067
C7H6O4	smoke particles, woody and grass char Lignin	Phenols	Lignin	Lignin	Other	-136.197	-953.377	-3105.43	-11.4378	465.116	0.146092	0.464379	0.912128	0.00200157	0.137838
C6H8O4	smoke particles, woody char leachates Other	anhydrosugars, anhydrosugar	Other	Tannin	Other	-139.469	-836.815	-2823.32	-3.87346	465.116	0.163369	0.492559	0.938357	0.00111694	0.133421
C6H10O5	woody and grass chars and leachates, woody char leachates Carbohydrate	anhydrosugars, anhydrosugar	Carbohydrate	Carbohydrate	Carbohydrate	-139.469	-836.815	-2823.32	-3.87346	465.116	0.163369	0.492559	0.938357	0.00111694	0.133421
C8H8O	smoke particles Unsat Hydrocarbon	Phenols	Unsat Hydrocarbon	Unsat Hydrocarbon	Other	-148.06	-1184.48	-4329.78	-51.0145	465.116	0.0956404	0.566533	1.01261	0.0125477	0.12629
C7H8O2	smoke particles Lignin	Phenols	Lignin	Lignin	Other	-146.014	-1022.1	-3670.78	-34.1886	465.116	0.117394	0.54892	0.995175	0.00560645	0.127641
C7H8O3	smoke particles Lignin	Phenols	Lignin	Lignin	Other	-142.742	-999.192	-3482.33	-7.2672	465.116	0.131478	0.52074	0.970422	0.00413077	0.130684
C8H8O3	smoke particles, smoke particles; woody and grass chars Lignin	Phenols	Lignin	Lignin	Other	-142.333	-1138.66	-3952.88	-3.90202	465.116	0.116678	0.517217	0.970488	0.0079122	0.131541
C8H8O4	smoke particles; woody and grass chars Lignin	Phenols	Lignin	Lignin	Other	-139.469	-1115.75	-3764.43	-3.87346	465.116	0.122527	0.492559	0.946328	0.0060644	0.134554
C8H10O	smoke particles, woody char leachates Unsat Hydrocarbon	Phenols, Phenol	Unsat Hydrocarbon	Unsat Hydrocarbon	Other	-150.923	-1207.38	-4518.23	-74.5708	465.116	0.0864377	0.591191	1.03108	0.0153443	0.123996
C8H10O2	woody chars, smoke particles, woody char leachates Other	Phenols, Phenol	Other	Lignin	Other	-148.06	-1184.48	-4329.78	-51.0145	465.116	0.0956404	0.566533	1.01261	0.0125477	0.12629
C8H10O3	smoke particles Lignin	Phenols	Lignin	Lignin	Other	-145.196	-1161.57	-4141.33	-27.4583	465.116	0.105681	0.541875	0.992488	0.0100711	0.128796
C9H8O2	woody chars Other	Phenols	Other	Lignin	Other	-144.56	-1301.04	-4611.88	-22.2235	465.116	0.0960329	0.536395	0.990332	0.0160527	0.129719
C9H8O3	smoke particles; woody and grass chars Lignin	Phenols	Lignin	Lignin	Other	-142.015	-1278.13	-4423.43	-1.28466	465.116	0.104858	0.514477	0.970532	0.013198	0.132218
C9H8O4	smoke particles Lignin	Phenols	Lignin	Lignin	Other	-139.469	-1255.22	-4234.98	-3.87346	465.116	0.108913	0.492559	0.949001	0.0106588	0.134934
C9H10O2	smoke particles Other	Phenols	Other	Lignin	Other	-147.105	-1323.95	-4800.33	-43.1624	465.116	0.0879009	0.558314	1.0086	0.0192205	0.127417
C9H10O3	smoke particles; woody and grass chars, smoke particles, woody chars Lignin	Phenols	Lignin	Lignin	Other	-144.56	-1301.04	-4611.88	-22.2235	465.116	0.0960329	0.536395	0.990332	0.0160527	0.129719
C9H10O4	smoke particles, smoke particles; woody and grass chars Lignin	Phenols	Lignin	Lignin	Other	-142.015	-1278.13	-4423.43	-1.28466	465.116	0.104858	0.514477	0.970532	0.013198	0.132218
C9H10O5	smoke particles; woody and grass chars Lignin	Phenols	Lignin	Lignin	Other	-139.469	-1255.22	-4234.98	-3.87346	465.116	0.108913	0.492559	0.949001	0.0106588	0.134934
C9H12O2	woody chars, smoke particles, woody char leachates Other	Phenols, Phenol	Other	Lignin	Other	-149.65	-1346.85	-4988.78	-64.1013	465.116	0.0803833	0.580232	1.02551	0.0226964	0.12529
C9H12O3	smoke particles Lignin	Phenols	Lignin	Lignin	Other	-147.105	-1323.95	-4800.33	-43.1624	465.116	0.0879009	0.558314	1.0086	0.0192205	0.127417
C9H14O3	smoke particles Protein	Phenols	Protein	Protein	Other	-149.65	-1346.85	-4988.78	-64.1013	465.116	0.0803833	0.580232	1.02551	0.0226964	0.12529
C9H16O3	smoke particles Protein	alkanoic acids	Protein	Protein	Other	-152.196	-1369.76	-5177.23	-85.0402	465.116	0.073413	0.60215	1.0412	0.0264725	0.123322
C10H8	forest duff Other	PAHs	Other	Unsat Hydrocarbon	Other	-148.632	-1486.32	-5459.34	-55.7258	465.116	0.074989	0.571464	1.02088	0.0313791	0.126366
C10H10O3	smoke particles Lignin	Phenols	Lignin	Lignin	Other	-144.051	-1440.51	-5082.44	-18.0358	465.116	0.0879658	0.532012	0.988563	0.0234703	0.130475
C10H10O4	woody and grass chars Lignin	Phenols	Lignin	Lignin	Other	-141.76	-1417.6	-4893.99	0.809231	468.684	0.0959326	0.51038	0.977848	0.0198122	0.131742
C10H12O2	smoke particles Other	Phenols	Other	Lignin	Other	-148.632	-1486.32	-5459.34	-55.7258	465.116	0.074989	0.571464	1.02088	0.0313791	0.126366
C10H12O3	smoke particles Lignin	Phenols	Lignin	Lignin	Other	-146.342	-1463.42	-5270.89	-36.8808	465.116	0.0812454	0.551738	1.00529	0.0272826	0.128346
C10H12O4	woody and grass chars, smoke particles, woody chars, woody char leachates Lignin	Phenols, Phenol	Lignin	Lignin	Other	-144.051	-1440.51	-5082.44	-18.0358	465.116	0.0879658	0.532012	0.988563	0.0234703	0.130475
C10H12O5	smoke particles Lignin	Phenols	Lignin	Lignin	Other	-141.76	-1417.6	-4893.99	0.809231	468.684	0.0959326	0.51038	0.977848	0.0198122	0.131742
C10H14O2	smoke particles, woody char leachates Other	Phenols, Phenol	Other	Lignin	Other	-150.923	-1509.23	-5647.79	-74.5708	465.116	0.0691502	0.591191	1.03544	0.0357481	0.124521
C10H14O3	smoke particles Lignin	Phenols	Lignin	Lignin	Other	-148.632	-1486.32	-5459.34	-55.7258	465.116	0.074989	0.571464	1.02088	0.0313791	0.126366
C10H14O4	smoke particles, woody char leachates Lignin	Phenols, Phenol	Lignin	Lignin	Other	-146.342	-1463.42	-5270.89	-36.8808	465.116	0.0812454	0.551738	1.00529	0.0272826	0.128346
C10H16O2	smoke particles Lipid	Phenols, sesquiterpenoids	Lipid	Lipid	Other	-153.214	-1532.14	-5836.24	-93.4158	465.116	0.0636884	0.610917	1.04908	0.0403773	0.122799
C11H12O4	smoke particles Lignin	Phenols	Lignin	Lignin	Other	-143.634	-1579.98	-5552.99	-14.6094	465.116	0.0811287	0.528425	0.987085	0.0321755	0.131105
C11H12O5	smoke particles Lignin	Phenols	Lignin	Lignin	Other	-141.552	-1557.07	-5364.54	0.402041	466.889	0.0871073	0.509547	0.974212	0.0279729	0.132712
C11H14O3	smoke particles Other	Phenols	Other	Lignin	Other	-147.799	-1625.79	-5929.89	-48.873	465.116	0.0701941	0.564291	1.01697	0.0412081	0.127275
C11H14O4	smoke particles Lignin	Phenols	Lignin	Lignin	Other	-145.717	-1602.88	-5741.44	-31.7412	465.116	0.0754819	0.546358	1.00251	0.0365648	0.129126
C12H8	forest duff Other	PAHs	Other	Cond Hydrocarbon	Other	-147.105	-1765.26	-6400.45	-43.1624	465.116	0.0659257	0.558314	1.01363	0.0519894	0.128052
C12H10	forest duff Other	PAHs	Other	Unsat Hydrocarbon	Other	-149.014	-1788.17	-6588.9	-58.8666	465.116	0.0616567	0.574752	1.02635	0.0573092	0.126416
C12H14O5	smoke particles Lignin	Phenols	Lignin	Lignin	Other	-143.287	-1719.45	-6023.55	-11.7541	465.116	0.075265	0.525436	0.985833	0.0419879	0.131637
C12H16O5	plant biochar leachate, smoke particles Lignin	Unknown, Phenols	Lignin	Lignin	Other	-145.196	-1742.35	-6212	-27.4583	465.116	0.0704537	0.541875	1.00015	0.0468777	0.12979
C13H10	forest duff; smoke particles Other	PAHs	Other	Cond Hydrocarbon	Other	-148.28	-1927.64	-7059.45	-52.8265	465.116	0.0584025	0.56843	1.0227	0.0692151	0.127177
C14H10	woody and grass chars; forest duff; smoke particles Other	PAHs	Other	Cond Hydrocarbon	Other	-147.651	-2067.11	-7530	-47.6493	465.116	0.0554405	0.56301	1.01949	0.0816439	0.127845
C14H12	smoke particles Other	PAHs	Other	Unsat Hydrocarbon	Other	-149.287	-2090.02	-7718.45	-61.1101	465.116	0.0523429	0.5771	1.03023	0.0877495	0.12645
C14H14	smoke particles Other	Phenols	Other	Unsat Hydrocarbon	Other	-150.923	-2112.92	-7906.9	-74.5708	465.116	0.049393	0.591191	1.04046	0.0939789	0.125124
C13H26	smoke particles Lipid	n-alkenes	Lipid	Unsat Hydrocarbon	Other	-162.377	-2110.9	-8567.05	-168.796	465.116	0.0345884	0.689822	1.09957	0.119533	0.117328
C14H28	smoke particles Lipid	n-alkylcyclohexanes, other, n-alkenes	Lipid	Unsat Hydrocarbon	Other	-162.377	-2273.28	-9226.05	-168.796	465.116	0.0321178	0.689822	1.10045	0.140176	0.117421
C15H10	smoke particles Other	PAHs	Other	Cond Hydrocarbon	Other	-147.105	-2206.58	-8000.56	-43.1624	465.116	0.0527406	0.558314	1.01666	0.0944505	0.128435
C15H12	smoke particles, woody and grass chars; smoke particles, woody and grass chars Other	PAHs	Other	Unsat Hydrocarbon	Other	-148.632	-2229.48	-8189.01	-55.7258	465.116	0.0499927	0.571464	1.02685	0.100759	0.127105
C15H16O4	plant biochar leachate, smoke particles Other	Unknown, Phenols	Other	Lignin	Other	-145.578	-2183.67	-7812.11	-30.5991	465.116	0.055621	0.545163	1.00598	0.0882518	0.12983
C15H18	smoke particles Other	sesquiterpenoids	Other	Unsat Hydrocarbon	Other	-153.214	-2298.21	-8754.36	-93.4158	465.116	0.0424589	0.610917	1.05482	0.120244	0.123471
C15H18O4	plant biochar leachate, smoke particles Other	Unknown, sesquiterpenoids	Other	Lignin	Other	-147.105	-2206.58	-8000.56	-43.1624	465.116	0.0527406	0.558314	1.01666	0.0944505	0.128435
C15H22	smoke particles Other	sesquiterpenoids	Other	Unsat Hydrocarbon	Other	-156.268	-2344.02	-9131.26	-118.542	465.116	0.0379547	0.637219	1.07155	0.133606	0.121308
C15H22O	smoke particles Unsat Hydrocarbon	sesquiterpenoids	Unsat Hydrocarbon	Unsat Hydrocarbon	Other	-154.741	-2321.12	-8942.81	-105.979	465.116	0.0401593	0.624068	1.06336	0.126894	0.122366
C15H30	smoke particles Lipid	n-alkenes	Lipid	Unsat Hydrocarbon	Other	-162.377	-2435.65	-9885.06	-168.796	465.116	0.0299766	0.689822	1.10121	0.160928	0.117502
C16H10	smoke particles, woody and grass chars; forest duff; smoke particles Other	PAHs	Other	Cond Hydrocarbon	Other	-146.628	-2346.05	-8471.11	-39.2364	465.116	0.0502744	0.554204	1.01414	0.10751	0.128961
C16H10O8	plant biochar leachate, charred soil leachate and soil pore water Cond Hydrocarbon	Unknown	Cond Hydrocarbon	Cond Hydrocarbon	Other	-135.174	-2162.78	-6963.51	-14.0462	465.116	0.0647762	0.455572	0.917797	0.0598532	0.141579
C16H10O9	plant biochar leachate, charred soil leachate and soil pore water Cond Hydrocarbon	Unknown	Cond Hydrocarbon	Cond Hydrocarbon	Other	-133.742	-2139.88	-6775.06	-17.9215	465.116	0.066006	0.443244	0.902764	0.0545677	0.143529
C16H12	smoke particles Other	PAHs	Other	Cond Hydrocarbon	Other	-148.06	-2368.95	-8659.56	-51.0145	465.116	0.0478202	0.566533	1.02384	0.113971	0.127691
C16H14	woody and grass chars; smoke particles, smoke particles Other	PAHs	Other	Unsat Hydrocarbon	Other	-149.491	-2391.86	-8848.01	-62.7926	465.116	0.0454705	0.578862	1.03313	0.12051	0.126476
C16H16O4	plant biochar leachate, smoke particles Other	Unknown, Phenols	Other	Lignin	Other	-145.196	-2323.14	-8282.66	-27.4583	465.116	0.0528403	0.541875	1.004	0.101137	0.13029
C16H18O2	smoke particles Unsat Hydrocarbon	Phenols	Unsat Hydrocarbon	Unsat Hydrocarbon	Other	-149.491	-2391.86	-8848.01	-62.7926	465.116	0.0454705	0.578862	1.03313	0.12051	0.126476
C16H18O4	plant biochar leachate, smoke particles Other	Unknown, Phenols	Other	Lignin	Other	-146.628	-2346.05	-8471.11	-39.2364	465.116	0.0502744	0.554204	1.01414	0.10751	0.128961
C16H18O5	plant biochar leachate, smoke particles Lignin	Unknown, Phenols	Lignin	Lignin	Other	-145.196	-2323.14	-8282.66	-27.4583	465.116	0.0528403	0.541875	1.004	0.101137	0.13029
C16H31N	smoke particles Lipid	n-alkylnitriles	Lipid	Unsat Hydrocarbon	Other	-157.016	-2512.26	-10127.2	-142.742	465.116	0.0318325	0.66255	1.09679	0.167825	0.11816
C16H32	smoke particles Lipid	n-alkylcyclohexanes, n-alkenes	Lipid	Unsat Hydrocarbon	Other	-162.377	-2598.03	-10544.1	-168.796	465.116	0.0281031	0.689822	1.10187	0.181592	0.117573
C16H32O2	plant biochar leachate, smoke particles Lipid	Unknown, alkanoic acids	Lipid	Lipid;Unsat Hydrocarbon	Other	-159.513	-2552.22	-10167.2	-145.24	465.116	0.0314618	0.665164	1.08857	0.167801	0.119282
C17H12	smoke particles Other	PAHs	Other	Cond Hydrocarbon	Other	-147.554	-2508.42	-9130.12	-46.8575	465.116	0.0458109	0.562181	1.02113	0.127287	0.128216
C17H12O7	plant biochar leachate, charred soil leachate and soil pore water Cond Hydrocarbon	Unknown	Cond Hydrocarbon	Cond Hydrocarbon	Other	-138.122	-2348.07	-7810.97	-6.85336	465.116	0.0586692	0.480956	0.947061	0.0830534	0.13796
C17H12O8	plant biochar leachate, charred soil leachate and soil pore water Cond Hydrocarbon	Unknown	Cond Hydrocarbon	Cond Hydrocarbon	Other	-136.774	-2325.16	-7622.52	-10.0195	465.116	0.0597043	0.469352	0.934402	0.0771579	0.13962
C17H12O9	plant biochar leachate, charred soil leachate and soil pore water Cond Hydrocarbon	Unknown	Cond Hydrocarbon	Cond Hydrocarbon	Other	-135.427	-2302.25	-7434.07	-13.3899	465.116	0.0607644	0.457748	0.921106	0.0714001	0.141358
C17H12O10	plant biochar leachate, charred soil leachate and soil pore water Cond Hydrocarbon	Unknown	Cond Hydrocarbon	Cond Hydrocarbon	Other	-134.079	-2279.35	-7245.62	-16.985	465.116	0.0618486	0.446144	0.907123	0.0657915	0.143179
C17H16	smoke particles Other	PAHs	Other	Unsat Hydrocarbon	Other	-150.249	-2554.24	-9507.02	-69.0281	465.116	0.0416627	0.585389	1.03854	0.140597	0.125933
C17H20	smoke particles Other	diterpeneoids	Other	Unsat Hydrocarbon	Other	-152.944	-2600.05	-9883.92	-91.1987	465.116	0.0378309	0.608596	1.05463	0.154088	0.123831
C17H20O4	plant biochar leachate, smoke particles Other	Unknown, Phenols	Other	Lignin	Other	-147.554	-2508.42	-9130.12	-46.8575	465.116	0.0458109	0.562181	1.02113	0.127287	0.128216
C17H20O5	plant biochar leachate, smoke particles Lignin	Unknown, Phenols	Lignin	Lignin	Other	-146.207	-2485.52	-8941.67	-35.7722	465.116	0.0480161	0.550578	1.01188	0.120718	0.129432
C17H20O6	plant biochar leachate, smoke particles Lignin	Unknown, Phenols	Lignin	Lignin	Other	-144.859	-2462.61	-8753.22	-24.6869	465.116	0.0503163	0.538974	1.00223	0.114217	0.130701
C17H34	smoke particles Lipid	n-alkenes	Lipid	Unsat Hydrocarbon	Other	-162.377	-2760.41	-11203.1	-168.796	465.116	0.0264499	0.689822	1.10246	0.202018	0.117636
C18H10	smoke particles Other	PAHs	Other	Cond Hydrocarbon	Other	-145.832	-2624.98	-9412.22	-32.693	465.116	0.0459428	0.547354	1.00984	0.133986	0.129856
C18H10O6	plant biochar leachate, charred soil leachate and soil pore water Cond Hydrocarbon	Unknown	Cond Hydrocarbon	Cond Hydrocarbon	Other	-138.197	-2487.54	-8281.52	-6.68308	465.116	0.0553562	0.4816	0.94839	0.095505	0.137963
C18H10O7	plant biochar leachate, charred soil leachate and soil pore water Cond Hydrocarbon	Unknown	Cond Hydrocarbon	Cond Hydrocarbon	Other	-136.924	-2464.63	-8093.07	-9.65796	465.116	0.0562776	0.470641	0.936489	0.0893979	0.139528
C18H10O8	plant biochar leachate, charred soil leachate and soil pore water Cond Hydrocarbon	Unknown	Cond Hydrocarbon	Cond Hydrocarbon	Other	-135.651	-2441.72	-7904.62	-12.8131	465.116	0.0572201	0.459682	0.924025	0.0834039	0.141163
C18H10O9	plant biochar leachate, charred soil leachate and soil pore water Cond Hydrocarbon	Unknown	Cond Hydrocarbon	Cond Hydrocarbon	Other	-134.379	-2418.82	-7716.17	-16.1655	465.116	0.0581831	0.448723	0.910955	0.0775337	0.142871
C18H10O10	plant biochar leachate, charred soil leachate and soil pore water Cond Hydrocarbon	Unknown	Cond Hydrocarbon	Cond Hydrocarbon	Other	-133.106	-2395.91	-7527.72	-19.7342	465.116	0.0591656	0.437764	0.897236	0.0717982	0.144656
C18H10O11	plant biochar leachate, charred soil leachate and soil pore water Cond Hydrocarbon	Unknown	Cond Hydrocarbon	Cond Hydrocarbon	Other	-131.833	-2373	-7339.27	-23.5408	465.116	0.0601661	0.426805	0.882817	0.0662087	0.14652
C18H10O12	plant biochar leachate, charred soil leachate and soil pore water Cond Hydrocarbon	Unknown	Cond Hydrocarbon	Cond Hydrocarbon	Other	-130.561	-2350.09	-7150.82	-27.6099	465.116	0.0611827	0.415846	0.867644	0.060777	0.148466
C18H12	woody and grass chars; forest duff; smoke particles Other	PAHs	Other	Cond Hydrocarbon	Other	-147.105	-2647.89	-9600.67	-43.1624	465.116	0.0439505	0.558314	1.01869	0.140625	0.128691
C18H18	smoke particles; woody and grass chars Other	diterpeneoids, PAHs	Other	Unsat Hydrocarbon	Other	-150.923	-2716.62	-10166	-74.5708	465.116	0.0384168	0.591191	1.04326	0.160783	0.125461
C18H20	smoke particles Other	diterpeneoids	Other	Unsat Hydrocarbon	Other	-152.196	-2739.52	-10354.5	-85.0402	465.116	0.0367065	0.60215	1.05086	0.167561	0.124465
C18H20O	smoke particles Unsat Hydrocarbon	diterpeneoids	Unsat Hydrocarbon	Unsat Hydrocarbon	Other	-150.923	-2716.62	-10166	-74.5708	465.116	0.0384168	0.591191	1.04326	0.160783	0.125461
C18H22	smoke particles Other	diterpeneoids	Other	Unsat Hydrocarbon	Other	-153.468	-2762.43	-10542.9	-95.5097	465.116	0.0350573	0.613109	1.05818	0.174358	0.123507
C18H22O3	plant biochar leachate, smoke particles Other	Unknown, diterpeneoids	Other	Lignin	Other	-149.65	-2693.71	-9977.57	-64.1013	465.116	0.0401916	0.580232	1.03538	0.15403	0.126496
C18H22O4	plant biochar leachate, smoke particles Other	Unknown, Phenols	Other	Lignin	Other	-148.378	-2670.8	-9789.12	-53.6319	465.116	0.0420349	0.569273	1.02719	0.147309	0.127571
C18H22O6	plant biochar leachate, smoke particles Lignin	Unknown, Phenols	Lignin	Lignin	Other	-145.832	-2624.98	-9412.22	-32.693	465.116	0.0459428	0.547354	1.00984	0.133986	0.129856
C18H26O3	smoke particles Other	diterpeneoids	Other	Lignin	Other	-152.196	-2739.52	-10354.5	-85.0402	465.116	0.0367065	0.60215	1.05086	0.167561	0.124465
C18H30O2	smoke particles Lipid	alkanoic acids	Lipid	Lipid;Unsat Hydrocarbon	Other	-156.014	-2808.25	-10919.8	-116.449	465.116	0.0319298	0.635027	1.07208	0.187992	0.121694
C18H34O2	plant biochar leachate, smoke particles Lipid	Unknown, alkanoic acids	Lipid	Lipid;Unsat Hydrocarbon	Other	-158.559	-2854.06	-11296.7	-137.387	465.116	0.029011	0.656945	1.08506	0.201646	0.120008
C18H35N	smoke particles Lipid	n-alkylnitriles	Lipid	Unsat Hydrocarbon	Other	-157.612	-2837.02	-11445.2	-145.637	465.116	0.0279138	0.665581	1.09852	0.208654	0.118216
C18H36	smoke particles Lipid	n-alkylcyclohexanes; other, n-alkenes	Lipid	Unsat Hydrocarbon	Other	-162.377	-2922.78	-11862.1	-168.796	465.116	0.0249805	0.689822	1.10298	0.222095	0.117692
C18H36O	smoke particles Lipid	other	Lipid	Lipid;Unsat Hydrocarbon	Other	-161.104	-2899.88	-11673.6	-158.326	465.116	0.0262806	0.678863	1.0972	0.215288	0.118437
C18H24O2	smoke particles Unsat Hydrocarbon	diterpeneoids	Unsat Hydrocarbon	Unsat Hydrocarbon	Other	-152.196	-2739.52	-10354.5	-85.0402	465.116	0.0367065	0.60215	1.05086	0.167561	0.124465
C19H14	smoke particles Other	PAHs	Other	Cond Hydrocarbon	Other	-147.909	-2810.27	-10259.7	-49.7747	465.116	0.0404829	0.565235	1.02463	0.16063	0.128045
C19H24	smoke particles Other	PAHs	Other	Unsat Hydrocarbon	Other	-153.937	-2924.81	-11201.9	-99.3668	465.116	0.0326506	0.617146	1.06132	0.194446	0.123221
C19H26	smoke particles Other	diterpeneoids	Other	Unsat Hydrocarbon	Other	-155.143	-2947.72	-11390.4	-109.285	465.116	0.0312396	0.627529	1.06793	0.201229	0.122356
C19H26O	smoke particles Unsat Hydrocarbon	diterpeneoids	Unsat Hydrocarbon	Unsat Hydrocarbon	Other	-153.937	-2924.81	-11201.9	-99.3668	465.116	0.0326506	0.617146	1.06132	0.194446	0.123221
C19H36O2	plant biochar leachate, smoke particles Lipid	Unknown, alkanoic acids, diterpeneoids	Lipid	Lipid;Unsat Hydrocarbon	Other	-158.76	-3016.44	-11955.7	-139.041	465.116	0.0272736	0.658675	1.08653	0.221546	0.119933
C19H38	smoke particles Lipid	n-alkenes	Lipid	Unsat Hydrocarbon	Other	-162.377	-3085.16	-12521.1	-168.796	465.116	0.0236657	0.689822	1.10345	0.241744	0.117742
C19H38O4	plant biochar leachate, smoke particles Lipid	Unknown, other	Lipid	Lipid	Other	-157.554	-2993.53	-11767.3	-129.122	465.116	0.0285533	0.648293	1.08053	0.214782	0.120714
C20H8O6	plant biochar leachate, charred soil leachate and soil pore water Cond Hydrocarbon	Unknown	Cond Hydrocarbon	Cond Hydrocarbon	Other	-137.178	-2743.57	-9034.18	-9.04907	465.116	0.0504824	0.472833	0.940017	0.114613	0.139374
C20H8O7	plant biochar leachate, charred soil leachate and soil pore water Cond Hydrocarbon	Unknown	Cond Hydrocarbon	Cond Hydrocarbon	Other	-136.033	-2720.66	-8845.73	-11.8467	465.116	0.0512416	0.46297	0.92894	0.108297	0.140834
C20H8O8	plant biochar leachate, charred soil leachate and soil pore water Cond Hydrocarbon	Unknown	Cond Hydrocarbon	Cond Hydrocarbon	Other	-134.888	-2697.75	-8657.28	-14.7997	465.116	0.052016	0.453107	0.917382	0.102061	0.142353
C20H8O9	plant biochar leachate, charred soil leachate and soil pore water Cond Hydrocarbon	Unknown	Cond Hydrocarbon	Cond Hydrocarbon	Other	-133.742	-2674.85	-8468.83	-17.9215	465.116	0.0528048	0.443244	0.905314	0.0959154	0.143934
C20H8O10	plant biochar leachate, charred soil leachate and soil pore water Cond Hydrocarbon	Unknown	Cond Hydrocarbon	Cond Hydrocarbon	Other	-132.597	-2651.94	-8280.38	-21.227	465.116	0.0536074	0.43338	0.892699	0.0898683	0.145578
C20H8O11	plant biochar leachate, charred soil leachate and soil pore water Cond Hydrocarbon	Unknown	Cond Hydrocarbon	Cond Hydrocarbon	Other	-131.452	-2629.03	-8091.93	-24.7327	465.116	0.0544226	0.423517	0.8795	0.0839298	0.147288
C20H8O12	plant biochar leachate, charred soil leachate and soil pore water Cond Hydrocarbon	Unknown	Cond Hydrocarbon	Cond Hydrocarbon	Other	-130.306	-2606.12	-7903.48	-28.4576	465.116	0.0552489	0.413654	0.865676	0.0781101	0.149065
C20H8O13	plant biochar leachate, charred soil leachate and soil pore water Cond Hydrocarbon	Unknown	Cond Hydrocarbon	Cond Hydrocarbon	Other	-129.161	-2583.22	-7715.03	-32.4228	465.116	0.0560845	0.403791	0.85118	0.0724197	0.150912
C20H12	woody and grass chars; forest duff; smoke particles, woody and grass chars; smoke particles, forest duff; smoke particles, smoke particles Other	PAHs	Other	Cond Hydrocarbon	Other	-146.342	-2926.83	-10541.8	-36.8808	465.116	0.0406227	0.551738	1.01444	0.167119	0.129515
C20H12O5	plant biochar leachate, charred soil leachates and woody char leachates Cond Hydrocarbon	Unknown	Cond Hydrocarbon	Cond Hydrocarbon	Other	-140.615	-2812.29	-9599.53	-1.47501	465.116	0.0482983	0.502422	0.970653	0.133963	0.135319
C20H14O6	plant biochar leachate, charred soil leachate and soil pore water Cond Hydrocarbon	Unknown	Cond Hydrocarbon	Cond Hydrocarbon	Other	-140.615	-2812.29	-9599.53	-1.47501	465.116	0.0482983	0.502422	0.970653	0.133963	0.135319
C20H14O7	plant biochar leachate, charred soil leachate and soil pore water Cond Hydrocarbon	Unknown	Cond Hydrocarbon	Cond Hydrocarbon	Other	-139.469	-2789.38	-9411.08	-3.87346	465.116	0.0490106	0.492559	0.960848	0.127454	0.136619
C20H14O8	plant biochar leachate, charred soil leachate and soil pore water Cond Hydrocarbon	Unknown	Cond Hydrocarbon	Cond Hydrocarbon	Other	-138.324	-2766.48	-9222.63	-6.39491	465.116	0.0497387	0.482696	0.950644	0.121001	0.137969
C20H14O9	plant biochar leachate, charred soil leachate and soil pore water Cond Hydrocarbon	Unknown	Cond Hydrocarbon	Cond Hydrocarbon	Other	-137.178	-2743.57	-9034.18	-9.04907	465.116	0.0504824	0.472833	0.940017	0.114613	0.139374
C20H14O10	plant biochar leachate, charred soil leachate and soil pore water Cond Hydrocarbon	Unknown	Cond Hydrocarbon	Cond Hydrocarbon	Other	-136.033	-2720.66	-8845.73	-11.8467	465.116	0.0512416	0.46297	0.92894	0.108297	0.140834
C20H14O11	plant biochar leachate, charred soil leachate and soil pore water Cond Hydrocarbon	Unknown	Cond Hydrocarbon	Cond Hydrocarbon	Other	-134.888	-2697.75	-8657.28	-14.7997	465.116	0.052016	0.453107	0.917382	0.102061	0.142353
C20H14O12	plant biochar leachate, charred soil leachate and soil pore water Cond Hydrocarbon	Unknown	Cond Hydrocarbon	Cond Hydrocarbon	Other	-133.742	-2674.85	-8468.83	-17.9215	465.116	0.0528048	0.443244	0.905314	0.0959154	0.143934
C20H14O13	plant biochar leachate, charred soil leachate and soil pore water Tannin;Cond Hydrocarbon	Unknown	Tannin;Cond Hydrocarbon	Cond Hydrocarbon	Other	-132.597	-2651.94	-8280.38	-21.227	465.116	0.0536074	0.43338	0.892699	0.0898683	0.145578
C20H22O6	plant biochar leachate, smoke particles Lignin	Unknown, Phenols	Lignin	Lignin	Other	-145.196	-2903.92	-10353.3	-27.4583	465.116	0.0422722	0.541875	1.00632	0.160427	0.130591
C20H24O2	smoke particles Unsat Hydrocarbon	diterpeneoids	Unsat Hydrocarbon	Unsat Hydrocarbon	Other	-150.923	-3018.46	-11295.6	-74.5708	465.116	0.0345751	0.591191	1.04424	0.194027	0.125579
C20H24O3	smoke particles Unsat Hydrocarbon	diterpeneoids	Unsat Hydrocarbon	Lignin	Other	-149.778	-2995.55	-11107.1	-65.1483	465.116	0.03601	0.581328	1.03717	0.187288	0.126511
C20H24O5	plant biochar leachate, smoke particles Other	Unknown, Phenols	Other	Lignin	Other	-147.487	-2949.74	-10730.2	-46.3033	465.116	0.0390311	0.561601	1.02228	0.173829	0.128477
C20H26O	smoke particles Unsat Hydrocarbon	diterpeneoids	Unsat Hydrocarbon	Unsat Hydrocarbon	Other	-153.214	-3064.28	-11672.5	-93.4158	465.116	0.0318442	0.610917	1.0577	0.207504	0.123808
C20H26O2	plant biochar leachate, smoke particles Unsat Hydrocarbon	Unknown, diterpeneoids	Unsat Hydrocarbon	Unsat Hydrocarbon	Other	-152.068	-3041.37	-11484	-83.9933	465.116	0.0331872	0.601054	1.05108	0.200767	0.124678
C20H26O3	plant biochar leachate, smoke particles Unsat Hydrocarbon	Unknown, diterpeneoids	Unsat Hydrocarbon	Lignin	Other	-150.923	-3018.46	-11295.6	-74.5708	465.116	0.0345751	0.591191	1.04424	0.194027	0.125579
C20H28O	smoke particles Unsat Hydrocarbon	diterpeneoids	Unsat Hydrocarbon	Unsat Hydrocarbon	Other	-154.359	-3087.18	-11860.9	-102.838	465.116	0.0305438	0.62078	1.06411	0.214235	0.122967
C20H28O2	smoke particles Unsat Hydrocarbon	diterpeneoids	Unsat Hydrocarbon	Unsat Hydrocarbon	Other	-153.214	-3064.28	-11672.5	-93.4158	465.116	0.0318442	0.610917	1.0577	0.207504	0.123808
C20H28O3	plant biochar leachate, smoke particles Unsat Hydrocarbon	Unknown, diterpeneoids	Unsat Hydrocarbon	Lignin	Other	-152.068	-3041.37	-11484	-83.9933	465.116	0.0331872	0.601054	1.05108	0.200767	0.124678
C20H30O	smoke particles Unsat Hydrocarbon	diterpeneoids	Unsat Hydrocarbon	Lipid;Unsat Hydrocarbon	Other	-155.505	-3110.09	-12049.4	-112.261	465.116	0.0292841	0.630643	1.07032	0.220955	0.122153
C20H30O2	smoke particles Unsat Hydrocarbon	diterpeneoids	Unsat Hydrocarbon	Lipid;Unsat Hydrocarbon	Other	-154.359	-3087.18	-11860.9	-102.838	465.116	0.0305438	0.62078	1.06411	0.214235	0.122967
C20H30O5	plant biochar leachate, smoke particles Other	Unknown, diterpeneoids	Other	Lipid	Other	-150.923	-3018.46	-11295.6	-74.5708	465.116	0.0345751	0.591191	1.04424	0.194027	0.125579
C20H32	smoke particles Lipid	diterpeneoids	Lipid	Unsat Hydrocarbon	Other	-157.795	-3155.91	-12426.3	-131.106	465.116	0.0268794	0.65037	1.08218	0.234354	0.120604
C20H34O2	smoke particles Lipid	diterpeneoids	Lipid	Lipid;Unsat Hydrocarbon	Other	-156.65	-3133	-12237.8	-121.683	465.116	0.0280632	0.640506	1.07634	0.227663	0.121366
C20H34O3	plant biochar leachate, smoke particles Lipid	Unknown, diterpeneoids	Lipid	Lipid	Other	-155.505	-3110.09	-12049.4	-112.261	465.116	0.0292841	0.630643	1.07032	0.220955	0.122153
C20H38	smoke particles Lipid	other	Lipid	Unsat Hydrocarbon	Other	-161.232	-3224.63	-12991.6	-159.373	465.116	0.0235339	0.679959	1.09868	0.254307	0.118458
C20H39N	smoke particles Lipid	n-alkylnitriles	Lipid	Unsat Hydrocarbon	Other	-158.088	-3161.77	-12763.2	-147.953	465.116	0.0248498	0.668005	1.09989	0.248007	0.11826
C20H40	smoke particles Lipid	n-alkenes	Lipid	Unsat Hydrocarbon	Other	-162.377	-3247.54	-13180.1	-168.796	465.116	0.0224825	0.689822	1.10387	0.26091	0.117787
C20H40O	smoke particles Lipid	other	Lipid	Lipid;Unsat Hydrocarbon	Other	-161.232	-3224.63	-12991.6	-159.373	465.116	0.0235339	0.679959	1.09868	0.254307	0.118458
C21H12O5	plant biochar leachate, charred soil leachate and soil pore water Cond Hydrocarbon	Unknown	Cond Hydrocarbon	Cond Hydrocarbon	Other	-140.56	-2951.76	-10070.1	-1.58656	465.116	0.0460304	0.501953	0.970655	0.146952	0.135444
C21H12O6	plant biochar leachate, charred soil leachate and soil pore water Cond Hydrocarbon	Unknown	Cond Hydrocarbon	Cond Hydrocarbon	Other	-139.469	-2928.85	-9881.63	-3.87346	465.116	0.0466768	0.492559	0.961313	0.140391	0.136685
C21H12O7	plant biochar leachate, charred soil leachate and soil pore water Cond Hydrocarbon	Unknown	Cond Hydrocarbon	Cond Hydrocarbon	Other	-138.378	-2905.95	-9693.18	-6.27191	465.116	0.0473368	0.483166	0.951608	0.133872	0.137972
C21H12O8	plant biochar leachate, charred soil leachate and soil pore water Cond Hydrocarbon	Unknown	Cond Hydrocarbon	Cond Hydrocarbon	Other	-137.288	-2883.04	-9504.73	-8.79029	465.116	0.0480104	0.473772	0.941521	0.127401	0.139307
C21H12O9	plant biochar leachate, charred soil leachate and soil pore water Cond Hydrocarbon	Unknown	Cond Hydrocarbon	Cond Hydrocarbon	Other	-136.197	-2860.13	-9316.28	-11.4378	465.116	0.0486974	0.464379	0.931028	0.120986	0.140694
C21H12O10	plant biochar leachate, charred soil leachate and soil pore water Cond Hydrocarbon	Unknown	Cond Hydrocarbon	Cond Hydrocarbon	Other	-135.106	-2837.22	-9127.83	-14.2247	465.116	0.0493975	0.454985	0.920104	0.114634	0.142134
C21H12O11	plant biochar leachate, charred soil leachate and soil pore water Cond Hydrocarbon	Unknown	Cond Hydrocarbon	Cond Hydrocarbon	Other	-134.015	-2814.32	-8939.38	-17.1622	465.116	0.0501102	0.445592	0.908721	0.108352	0.143629
C21H12O12	plant biochar leachate, charred soil leachate and soil pore water Cond Hydrocarbon	Unknown	Cond Hydrocarbon	Cond Hydrocarbon	Other	-132.924	-2791.41	-8750.93	-20.2629	465.116	0.050835	0.436198	0.896851	0.10215	0.145181
C21H12O13	plant biochar leachate, charred soil leachate and soil pore water Cond Hydrocarbon	Unknown	Cond Hydrocarbon	Cond Hydrocarbon	Other	-131.833	-2768.5	-8562.48	-23.5408	465.116	0.051571	0.426805	0.884461	0.0960353	0.146792
C21H22	smoke particles Other	PAHs	Other	Unsat Hydrocarbon	Other	-151.468	-3180.84	-11954.6	-79.0577	465.116	0.0322938	0.595887	1.04794	0.213646	0.125196
C21H30O2	smoke particles Unsat Hydrocarbon	diterpeneoids	Unsat Hydrocarbon	Unsat Hydrocarbon	Other	-153.65	-3226.65	-12331.5	-97.0053	465.116	0.0298513	0.614674	1.06058	0.22699	0.123532
C21H34	smoke particles Lipid	steroids	Lipid	Unsat Hydrocarbon	Other	-158.014	-3318.28	-13085.3	-132.901	465.116	0.0253885	0.652248	1.08367	0.253473	0.120506
C21H42	smoke particles Lipid	n-alkenes	Lipid	Unsat Hydrocarbon	Other	-162.377	-3409.91	-13839.1	-168.796	465.116	0.0214119	0.689822	1.10425	0.279557	0.117827
C21H42O	smoke particles Lipid	n-alkanals	Lipid	Lipid;Unsat Hydrocarbon	Other	-161.286	-3387.01	-13650.6	-159.822	465.116	0.0223649	0.680429	1.09932	0.27308	0.118467
C21H42O4	plant biochar leachate, smoke particles Lipid	Unknown, other	Lipid	Lipid	Other	-158.014	-3318.28	-13085.3	-132.901	465.116	0.0253885	0.652248	1.08367	0.253473	0.120506
C22H12	smoke particles, woody and grass chars; forest duff; smoke particles Other	PAHs	Other	Cond Hydrocarbon	Other	-145.717	-3205.77	-11482.9	-31.7412	465.116	0.037741	0.546358	1.01089	0.193059	0.130205
C22H14	forest duff Other	PAHs	Other	Cond Hydrocarbon	Other	-146.758	-3228.68	-11671.3	-40.3071	465.116	0.0363976	0.555325	1.01816	0.199715	0.129239
C22H32O4	plant biochar leachate, smoke particles Other	Unknown, diterpeneoids	Other	Lignin	Other	-151.964	-3343.22	-12613.6	-83.1367	465.116	0.0302832	0.600157	1.05126	0.23289	0.124853
C22H36O4	plant biochar leachate, smoke particles Lipid	Unknown, diterpeneoids	Lipid	Lipid	Other	-154.047	-3389.03	-12990.5	-100.268	465.116	0.0280858	0.61809	1.06316	0.246054	0.123284
C22H42O3	plant biochar leachate, smoke particles Lipid	Unknown, alkanoic acids	Lipid	Lipid	Other	-158.212	-3480.66	-13744.3	-134.532	465.116	0.0240525	0.653956	1.08501	0.272097	0.120417
C22H43N	smoke particles Lipid	n-alkylnitriles	Lipid	Unsat Hydrocarbon	Other	-158.478	-3486.52	-14081.2	-149.848	465.116	0.0223893	0.669988	1.10101	0.2854	0.118296
C22H44	smoke particles Lipid	n-alkenes	Lipid	Unsat Hydrocarbon	Other	-162.377	-3572.29	-14498.1	-168.796	465.116	0.0204386	0.689822	1.1046	0.297663	0.117864
C23H32O2	smoke particles Unsat Hydrocarbon	diterpeneoids	Unsat Hydrocarbon	Unsat Hydrocarbon	Other	-153.413	-3528.5	-13461	-95.0545	465.116	0.0274913	0.612632	1.05996	0.258188	0.123792
C23H45N	smoke particles Lipid	n-alkylnitriles	Lipid	Unsat Hydrocarbon	Other	-158.648	-3648.9	-14740.2	-150.672	465.116	0.0213324	0.67085	1.1015	0.303291	0.118312
C23H46	smoke particles Lipid	n-alkenes	Lipid	Unsat Hydrocarbon	Other	-162.377	-3734.67	-15157.1	-168.796	465.116	0.01955	0.689822	1.10491	0.315217	0.117898
C24H8O6	plant biochar leachate, charred soil leachate and soil pore water Cond Hydrocarbon	Unknown	Cond Hydrocarbon	Cond Hydrocarbon	Other	-137.56	-3301.45	-10916.4	-8.14896	465.116	0.0418607	0.476121	0.945261	0.165663	0.139143
C24H8O7	plant biochar leachate, charred soil leachate and soil pore water Cond Hydrocarbon	Unknown	Cond Hydrocarbon	Cond Hydrocarbon	Other	-136.606	-3278.54	-10727.9	-10.4292	465.116	0.0423834	0.467901	0.936202	0.159132	0.140346
C24H8O8	plant biochar leachate, charred soil leachate and soil pore water Cond Hydrocarbon	Unknown	Cond Hydrocarbon	Cond Hydrocarbon	Other	-135.651	-3255.63	-10539.5	-12.8131	465.116	0.0429151	0.459682	0.926821	0.152624	0.14159
C24H8O9	plant biochar leachate, charred soil leachate and soil pore water Cond Hydrocarbon	Unknown	Cond Hydrocarbon	Cond Hydrocarbon	Other	-134.697	-3232.72	-10351	-15.3079	465.116	0.0434554	0.451463	0.917099	0.146144	0.142876
C24H8O10	plant biochar leachate, charred soil leachate and soil pore water Cond Hydrocarbon	Unknown	Cond Hydrocarbon	Cond Hydrocarbon	Other	-133.742	-3209.82	-10162.6	-17.9215	465.116	0.044004	0.443244	0.907018	0.139698	0.144205
C24H8O11	plant biochar leachate, charred soil leachate and soil pore water Cond Hydrocarbon	Unknown	Cond Hydrocarbon	Cond Hydrocarbon	Other	-132.788	-3186.91	-9974.14	-20.6626	465.116	0.0445606	0.435024	0.896557	0.133291	0.145578
C24H8O12	plant biochar leachate, charred soil leachate and soil pore water Cond Hydrocarbon	Unknown	Cond Hydrocarbon	Cond Hydrocarbon	Other	-131.833	-3164	-9785.69	-23.5408	465.116	0.0451246	0.426805	0.885695	0.126931	0.146997
C24H8O13	plant biochar leachate, charred soil leachate and soil pore water Cond Hydrocarbon	Unknown	Cond Hydrocarbon	Cond Hydrocarbon	Other	-130.879	-3141.09	-9597.24	-26.5665	465.116	0.0456954	0.418586	0.874408	0.120623	0.148463
C24H32O5	plant biochar leachate, smoke particles Other	Unknown, diterpeneoids	Other	Lignin	Other	-149.969	-3599.25	-13366.2	-66.7187	465.116	0.0298063	0.582971	1.03985	0.250766	0.126534
C24H38O	smoke particles Lipid	triterpenoids	Lipid	Lipid;Unsat Hydrocarbon	Other	-156.65	-3759.6	-14685.4	-121.683	465.116	0.023386	0.640506	1.07774	0.295325	0.121524
C24H46O3	smoke particles Lipid	alkanoic acids	Lipid	Lipid;Unsat Hydrocarbon	Other	-158.559	-3805.41	-15062.3	-137.387	465.116	0.0217582	0.656945	1.08735	0.307768	0.120262
C24H47N	smoke particles Lipid	n-alkylnitriles	Lipid	Unsat Hydrocarbon	Other	-158.803	-3811.28	-15399.2	-151.427	465.116	0.0203705	0.671641	1.10194	0.32063	0.118326
C24H48	smoke particles Lipid	n-alkylcyclohexanes, n-alkenes	Lipid	Unsat Hydrocarbon	Other	-162.377	-3897.05	-15816.1	-168.796	465.116	0.0187354	0.689822	1.1052	0.332216	0.117929
C24H48O3	plant biochar leachate, smoke particles Lipid	Unknown, alkanoic acids	Lipid	Lipid;Unsat Hydrocarbon	Other	-159.513	-3828.32	-15250.7	-145.24	465.116	0.0209745	0.665164	1.09198	0.313936	0.119656
C25H50	smoke particles Lipid	n-alkenes	Lipid	Unsat Hydrocarbon	Other	-162.377	-4059.42	-16475.1	-168.796	465.116	0.017986	0.689822	1.10547	0.348663	0.117957
C25H50O3	plant biochar leachate, smoke particles Lipid	Unknown, alkanoic acids	Lipid	Lipid;Unsat Hydrocarbon	Other	-159.628	-3990.7	-15909.7	-146.182	465.116	0.0200465	0.666151	1.0928	0.33082	0.119614
C26H16O4	plant biochar leachate, charred soil leachates and woody char leachates Cond Hydrocarbon	Unknown	Cond Hydrocarbon	Cond Hydrocarbon	Other	-142.993	-3717.83	-12988.2	-9.33808	465.116	0.0350917	0.522907	0.992028	0.229532	0.133069
C26H16O5	plant biochar leachate, charred soil leachates and woody char leachates Cond Hydrocarbon	Unknown	Cond Hydrocarbon	Cond Hydrocarbon	Other	-142.112	-3694.92	-12799.7	-2.09	465.116	0.0361746	0.51532	0.985115	0.223073	0.133994
C26H51N	smoke particles Lipid	n-alkylnitriles	Lipid	Unsat Hydrocarbon	Other	-159.078	-4136.03	-16717.2	-152.763	465.116	0.0186845	0.673039	1.10272	0.353658	0.118351
C26H52	smoke particles Lipid	n-alkenes, n-alkylcyclohexanes	Lipid	Unsat Hydrocarbon	Other	-162.377	-4221.8	-17134.1	-168.796	465.116	0.0172942	0.689822	1.10572	0.364567	0.117984
C26H52O	smoke particles Lipid	n-alkanals	Lipid	Lipid;Unsat Hydrocarbon	Other	-161.496	-4198.89	-16945.6	-161.548	465.116	0.0179142	0.682235	1.10175	0.358806	0.118502
C27H54	smoke particles Lipid	n-alkenes	Lipid	Unsat Hydrocarbon	Other	-162.377	-4384.18	-17793.1	-168.796	465.116	0.0166537	0.689822	1.10595	0.379939	0.118008
C28H38	smoke particles Other	isoprenoids, steroids	Other	Unsat Hydrocarbon	Other	-155.014	-4340.38	-16756.1	-108.223	465.116	0.0212994	0.626416	1.07012	0.344108	0.122778
C28H40	smoke particles Other	steroids	Other	Unsat Hydrocarbon	Other	-155.832	-4363.29	-16944.5	-114.953	465.116	0.0206653	0.633461	1.07448	0.349897	0.122201
C28H42	smoke particles Other	steroids	Other	Unsat Hydrocarbon	Other	-156.65	-4386.2	-17133	-121.683	465.116	0.0200452	0.640506	1.07874	0.355647	0.121637
C28H44	smoke particles Lipid	steroids	Lipid	Unsat Hydrocarbon	Other	-157.468	-4409.11	-17321.4	-128.414	465.116	0.0194385	0.647551	1.08292	0.361359	0.121086
C28H44O	smoke particles Lipid	steroids	Lipid	Lipid;Unsat Hydrocarbon	Other	-156.65	-4386.2	-17133	-121.683	465.116	0.0200452	0.640506	1.07874	0.355647	0.121637
C28H50	smoke particles Lipid	n-alkylbenzenes	Lipid	Unsat Hydrocarbon	Other	-159.923	-4477.83	-17886.8	-148.605	465.116	0.0176953	0.668687	1.0949	0.378256	0.119507
C28H55N	smoke particles Lipid	n-alkylnitriles	Lipid	Unsat Hydrocarbon	Other	-159.314	-4460.78	-18035.3	-153.908	465.116	0.0172555	0.674238	1.10339	0.384538	0.118372
C28H56	smoke particles Lipid	n-alkylcyclohexanes, n-alkenes	Lipid	Unsat Hydrocarbon	Other	-162.377	-4546.55	-18452.1	-168.796	465.116	0.0160589	0.689822	1.10616	0.394793	0.118031
C2H6O2	smoke particles Other	other	Other	Other	Other	-150.923	-301.846	-1129.56	-74.5708	465.116	0.345751	0.591191	0.967704	4.74651e-08	0.116375
C29H18O4	plant biochar leachate, charred soil leachate and soil pore water Cond Hydrocarbon	Unknown	Cond Hydrocarbon	Cond Hydrocarbon	Other	-143.419	-4159.15	-14588.3	-12.8371	465.116	0.0310028	0.52657	0.996047	0.270597	0.132732
C29H18O5	plant biochar leachate, charred soil leachate and soil pore water Cond Hydrocarbon	Unknown	Cond Hydrocarbon	Cond Hydrocarbon	Other	-142.629	-4136.24	-14399.9	-6.33887	465.116	0.0318598	0.519768	0.989949	0.264393	0.13355
C29H18O6	plant biochar leachate, charred soil leachate and soil pore water Cond Hydrocarbon	Unknown	Cond Hydrocarbon	Cond Hydrocarbon	Other	-141.839	-4113.33	-14211.4	0.159404	465.819	0.032789	0.512589	0.985154	0.258292	0.134187
C29H18O7	plant biochar leachate, charred soil leachate and soil pore water Cond Hydrocarbon	Unknown	Cond Hydrocarbon	Cond Hydrocarbon	Other	-141.049	-4090.42	-14023	-0.595576	465.116	0.0331257	0.506164	0.977264	0.251906	0.135254
C29H18O8	plant biochar leachate, charred soil leachate and soil pore water Cond Hydrocarbon	Unknown	Cond Hydrocarbon	Cond Hydrocarbon	Other	-140.259	-4067.51	-13834.5	-2.20674	465.116	0.0334605	0.499361	0.970663	0.245626	0.13614
C29H18O9	plant biochar leachate, charred soil leachate and soil pore water Cond Hydrocarbon	Unknown	Cond Hydrocarbon	Cond Hydrocarbon	Other	-139.469	-4044.61	-13646.1	-3.87346	465.116	0.0338004	0.492559	0.96388	0.239325	0.13705
C29H18O10	plant biochar leachate, charred soil leachate and soil pore water Cond Hydrocarbon	Unknown	Cond Hydrocarbon	Cond Hydrocarbon	Other	-138.679	-4021.7	-13457.6	-5.59866	465.116	0.0341456	0.485757	0.956907	0.233003	0.137984
C29H44	smoke particles Other	steroids	Other	Unsat Hydrocarbon	Other	-156.847	-4548.58	-17792	-123.308	465.116	0.0192114	0.642207	1.07997	0.370989	0.121526
C29H46	smoke particles Lipid	steroids, triterpenoids	Lipid	Unsat Hydrocarbon	Other	-157.637	-4571.48	-17980.4	-129.806	465.116	0.0186486	0.649009	1.08397	0.376559	0.120997
C29H46O	smoke particles Lipid	steroids, triterpenoids	Lipid	Lipid;Unsat Hydrocarbon	Other	-156.847	-4548.58	-17792	-123.308	465.116	0.0192114	0.642207	1.07997	0.370989	0.121526
C29H46O2	smoke particles Lipid	triterpenoids	Lipid	Lipid;Unsat Hydrocarbon	Other	-156.058	-4525.67	-17603.5	-116.81	465.116	0.0197862	0.635405	1.07587	0.36538	0.122068
C29H48	smoke particles Lipid	steroids, triterpenoids	Lipid	Unsat Hydrocarbon	Other	-158.427	-4594.39	-18168.9	-136.304	465.116	0.0180976	0.655811	1.0879	0.382089	0.120479
C29H48O	smoke particles Lipid	steroids	Lipid	Lipid;Unsat Hydrocarbon	Other	-157.637	-4571.48	-17980.4	-129.806	465.116	0.0186486	0.649009	1.08397	0.376559	0.120997
C29H50	smoke particles Lipid	steroids	Lipid	Unsat Hydrocarbon	Other	-159.217	-4617.3	-18357.3	-142.803	465.116	0.0175578	0.662613	1.09174	0.38758	0.119972
C29H58	smoke particles Lipid	n-alkenes	Lipid	Unsat Hydrocarbon	Other	-162.377	-4708.93	-19111.1	-168.796	465.116	0.0155051	0.689822	1.10636	0.409144	0.118052
C29H58O	smoke particles Lipid	n-alkanals	Lipid	Lipid;Unsat Hydrocarbon	Other	-161.587	-4686.02	-18922.7	-162.297	465.116	0.016003	0.68302	1.10281	0.403813	0.118517
C30H12O6	plant biochar leachate, charred soil leachate and soil pore water Cond Hydrocarbon	Unknown	Cond Hydrocarbon	Cond Hydrocarbon	Other	-139.469	-4184.08	-14116.6	-3.87346	465.116	0.0326738	0.492559	0.964105	0.250759	0.137082
C30H12O7	plant biochar leachate, charred soil leachate and soil pore water Cond Hydrocarbon	Unknown	Cond Hydrocarbon	Cond Hydrocarbon	Other	-138.706	-4161.17	-13928.2	-5.54018	465.116	0.0329962	0.485984	0.957369	0.244511	0.137986
C30H12O8	plant biochar leachate, charred soil leachate and soil pore water Cond Hydrocarbon	Unknown	Cond Hydrocarbon	Cond Hydrocarbon	Other	-137.942	-4138.26	-13739.7	-7.26438	465.116	0.0333232	0.479408	0.950449	0.238241	0.138913
C30H12O9	plant biochar leachate, charred soil leachate and soil pore water Cond Hydrocarbon	Unknown	Cond Hydrocarbon	Cond Hydrocarbon	Other	-137.178	-4115.35	-13551.3	-9.04907	465.116	0.033655	0.472833	0.943336	0.231952	0.139866
C30H12O10	plant biochar leachate, charred soil leachate and soil pore water Cond Hydrocarbon	Unknown	Cond Hydrocarbon	Cond Hydrocarbon	Other	-136.415	-4092.45	-13362.8	-10.8975	465.116	0.0339912	0.466258	0.936024	0.225645	0.140843
C30H12O11	plant biochar leachate, charred soil leachate and soil pore water Cond Hydrocarbon	Unknown	Cond Hydrocarbon	Cond Hydrocarbon	Other	-135.651	-4069.54	-13174.4	-12.8131	465.116	0.0343321	0.459682	0.928502	0.219323	0.141847
C30H12O12	plant biochar leachate, charred soil leachate and soil pore water Cond Hydrocarbon	Unknown	Cond Hydrocarbon	Cond Hydrocarbon	Other	-134.888	-4046.63	-12985.9	-14.7997	465.116	0.0346773	0.453107	0.920763	0.212988	0.142878
C30H46	smoke particles Other	triterpenoids	Other	Unsat Hydrocarbon	Other	-157.032	-4710.95	-18451	-124.824	465.116	0.0184431	0.643794	1.0811	0.385826	0.121423
C30H46O	smoke particles Other	triterpenoids	Other	Lipid;Unsat Hydrocarbon	Other	-156.268	-4688.05	-18262.5	-118.542	465.116	0.0189773	0.637219	1.07717	0.380357	0.121944
C30H46O2	smoke particles Other	triterpenoids	Other	Lipid;Unsat Hydrocarbon	Other	-155.505	-4665.14	-18074.1	-112.261	465.116	0.0195228	0.630643	1.07315	0.374848	0.122477
C30H48	smoke particles Lipid	triterpenoids	Lipid	Unsat Hydrocarbon	Other	-157.795	-4733.86	-18639.4	-131.106	465.116	0.0179196	0.65037	1.08496	0.391256	0.120914
C30H48O	smoke particles Lipid	triterpenoids	Lipid	Lipid;Unsat Hydrocarbon	Other	-157.032	-4710.95	-18451	-124.824	465.116	0.0184431	0.643794	1.0811	0.385826	0.121423
C30H50O2	smoke particles Lipid	triterpenoids	Lipid	Lipid;Unsat Hydrocarbon	Other	-157.032	-4710.95	-18451	-124.824	465.116	0.0184431	0.643794	1.0811	0.385826	0.121423
C30H60	smoke particles Lipid	n-alkylcyclohexanes, n-alkenes	Lipid	Unsat Hydrocarbon	Other	-162.377	-4871.31	-19770.1	-168.796	465.116	0.0149883	0.689822	1.10654	0.423009	0.118072
C31H10O8	charred soil leachate and soil pore water Cond Hydrocarbon	Unknown	Cond Hydrocarbon	Cond Hydrocarbon	Other	-137.252	-4254.82	-14021.8	-8.87362	465.116	0.0325381	0.473469	0.944248	0.243368	0.139804
C31H48O3	smoke particles Other	triterpenoids	Other	Lipid;Unsat Hydrocarbon	Other	-154.987	-4804.61	-18544.6	-108.005	465.116	0.0192568	0.626189	1.07057	0.38406	0.122865
C31H50O	smoke particles Lipid	triterpenoids	Lipid	Lipid;Unsat Hydrocarbon	Other	-157.204	-4873.33	-19110	-126.243	465.116	0.0177328	0.645279	1.08216	0.400172	0.121328
[truncated: 16,733 more rows]

## Sheet: Table S3 Sediment NOM Model Out
Molecular Formula	Group	𝚫GCox	𝚫Gd	𝚫GCat	𝚫Gan	𝚫Gdis	λ	CUE	Aerobic Respiration	Aerobic Respiration, C limited	Aerobic Respiration, O limited
[truncated: 398 more rows]

## Sheet: Table S4 Suface Water NOM Out
Molecular Formula	Group	𝚫GCox	𝚫Gd	𝚫GCat	𝚫Gan	𝚫Gdis	λ	CUE	Aerobic Respiration	Aerobic Respiration, C limited	Aerobic Respiration, O limited
[truncated: 811 more rows]

[truncated: 1 more sheets: References]
